# Supplementary material for: Construction of a high-density linkage map and detection of sex-specific markers in Penaeus japonicus
Source: PeerJ journal article supplement (doi:10.7717/peerj.12390), 2021-10-29

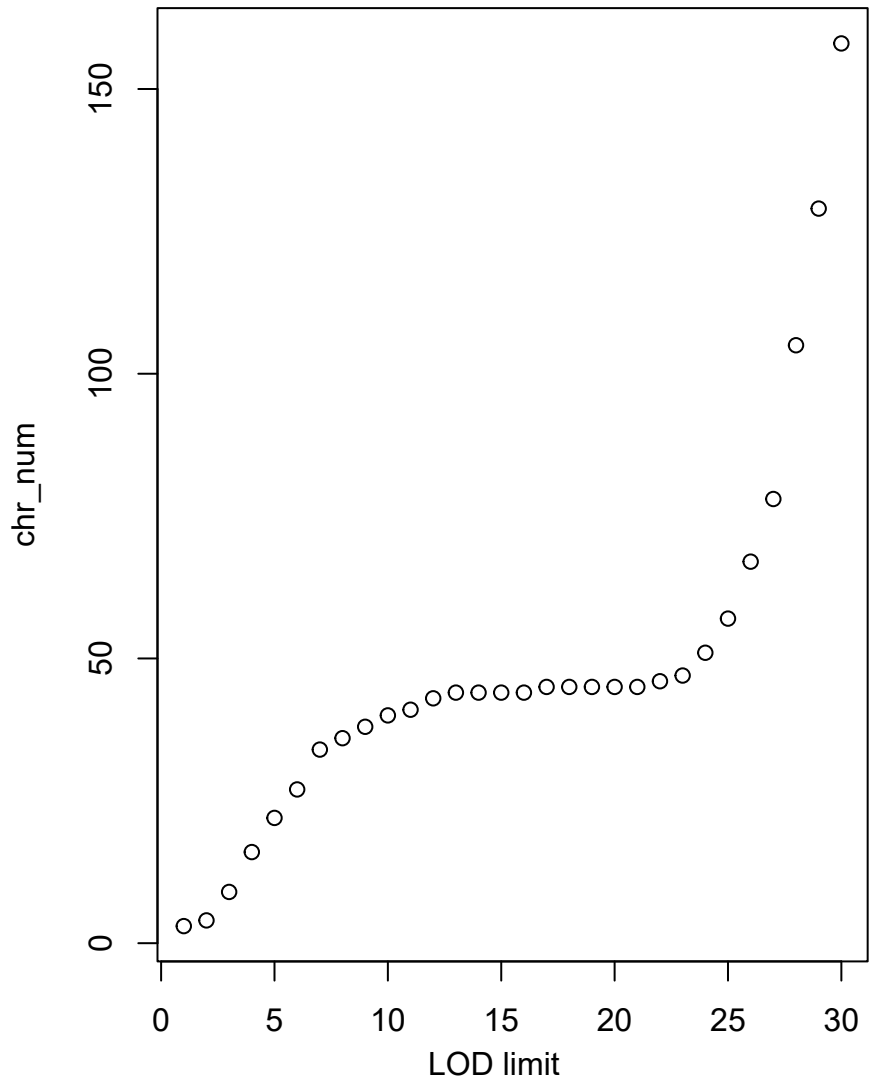

Supplement: FigureS1.pdf [file FigureS1.pdf]
