# Supplementary material for: Construction of a high-density linkage map and detection of sex-specific markers in Penaeus japonicus
Source: PeerJ. 2021 Oct 29;9:e12390. doi: 10.7717/peerj.12390 (PMC8559604; doi:10.7717/peerj.12390)
Supplement: Supplemental Information 1 [file peerj-09-12390-s001.xlsx]

## Sheet: Sheet1
Table S1. Genotypes of SNPs on the genetic linkage map.
Marker_ID	REF	ALT	C1	C2	C3	C4	C5	C6	C7	C8	C9	C10	C11	C12	C13	C14	C15	C16	C17	C18	C19	C20	C21	C22	C23	C24	C25	C26	C27	C28	C29	C30	C31	C32	C33	C34	C35	C36	C37	C38	C39	C40	C41	C42	C43	C44	C45	C46	C47
contig28319_82	G	A	AG	AG	AG	GG	GG	AG	AG	AG	AG	GG	AG	AG	GG	AG	AG	GG	AG	AG	GG	AG	GG	GG	GG	AG	AG	AG	GG	AG	GG	GG	GG	AG	GG	GG	GG	GG	AG	GG	AG	GG	AG	GG	GG	AG	AG	GG	GG
contig28319_96	G	A	AG	AG	AG	GG	GG	AG	AG	AG	AG	GG	AG	AG	GG	AG	AG	GG	AG	AG	GG	AG	GG	GG	GG	AG	AG	AG	GG	AG	GG	GG	GG	AG	GG	GG	GG	GG	AG	GG	AG	GG	AG	GG	GG	AG	AG	GG	GG
contig28319_83	G	A	AG	AG	AG	GG	GG	AG	AG	AG	AG	GG	AG	AG	GG	AG	AG	GG	AG	AG	GG	AG	GG	GG	GG	AG	AG	AG	GG	AG	AG	GG	GG	AG	GG	GG	GG	GG	AG	GG	AG	GG	AG	GG	GG	AG	AG	GG	GG
contig12932_90	T	C	TT	TT	TT	CT	TT	CT	CT	CT	TT	CT	CT	CT	CT	TT	CT	CT	TT	CT	CT	TT	TT	CT	TT	CT	TT	CT	TT	TT	CT	TT	CT	TT	TT	CT	TT	TT	CT	TT	CT	CT	CT	CT	TT	TT	TT	TT	TT
contig784270_26	G	A	AG	AG	AG	GG	AG	AG	GG	GG	AG	GG	GG	GG	GG	AG	GG	GG	AG	GG	GG	AG	AG	GG	AG	GG	AG	GG	AG	AG	GG	AG	GG	AG	AG	GG	AG	AG	GG	AG	GG	GG	GG	GG	AG	AG	AG	AG	AG
contig21440_98	T	C	TT	TT	TT	CT	CT	TT	TT	TT	TT	CT	TT	TT	CT	TT	TT	CT	TT	TT	CT	TT	CT	CT	CT	TT	TT	TT	CT	TT	TT	CT	CT	TT	CT	CC	CT	CT	TT	CT	TT	CT	TT	CT	CT	TT	TT	CT	CT
contig21440_52	G	A	GG	GG	GG	AG	AG	GG	GG	GG	GG	AG	GG	GG	AG	GG	GG	AG	GG	GG	AG	GG	AG	AG	AG	GG	GG	GG	AG	GG	GG	AG	AG	GG	AG	AA	AG	AG	GG	AG	GG	AG	GG	AG	AG	GG	GG	AG	AG
contig21440_53	C	A	CC	CC	CC	AC	AC	CC	CC	CC	CC	AC	CC	CC	AC	CC	CC	AC	CC	CC	AC	CC	AC	AC	AC	CC	CC	CC	AC	CC	CC	AC	AC	CC	AC	AA	AC	AC	CC	AC	CC	AC	CC	AC	AC	AC	CC	AC	AC
contig423427_7	C	T	CC	CC	CC	TC	TC	CC	CC	CC	CC	TC	CC	CC	TC	CC	CC	TC	CC	CC	TC	CC	TC	TC	TC	CC	CC	CC	TC	CC	TC	TC	TC	CC	TC	TC	TC	TC	CC	TC	CC	TC	CC	TC	TC	TC	CC	TC	TC
contig784270_92	C	A	AC	AC	AC	CC	AC	AC	AC	CC	AC	CC	CC	CC	CC	AC	CC	CC	AC	CC	CC	AC	AC	CC	CC	CC	AC	CC	AC	AC	CC	AC	CC	AC	AC	CC	AC	AC	CC	AC	CC	CC	CC	CC	CC	AC	AC	AC	AC
contig59559_57	A	T	TA	TA	TA	AA	AA	TA	TA	TA	TA	AA	TA	TA	AA	TA	TA	AA	TA	TA	AA	TA	AA	AA	AA	TA	TA	TA	AA	TA	AA	AA	AA	TA	AA	TT	AA	AA	TA	AA	TA	AA	TA	AA	AA	AA	TA	AA	AA
contig14927_283	A	C	CA	CA	CA	AA	AA	CA	CA	CA	CA	AA	CA	CA	AA	CA	CA	AA	CA	CA	AA	CA	AA	AA	AA	CA	CA	CA	AA	CA	AA	AA	AA	CA	AA	AA	AA	AA	CA	AA	CA	AA	CA	AA	AA	AA	CA	AA	AA
contig51826_174	A	G	AA	AA	AA	GA	GA	AA	AA	AA	AA	GA	AA	AA	GA	AA	AA	GA	AA	AA	GA	AA	GA	GA	GA	AA	AA	AA	GA	AA	GA	GA	GA	AA	GA	GA	GA	GA	AA	GA	AA	GA	AA	GA	AA	GA	AA	GA	GA
contig784270_27	T	C	CT	CT	CT	TT	CT	CT	CT	TT	CT	TT	TT	TT	TT	CT	TT	TT	CT	TT	TT	CT	CT	TT	TT	TT	CT	TT	CT	CT	TT	CT	TT	CT	CT	TT	CT	CT	TT	CT	TT	TT	TT	TT	CT	CT	CT	CT	CT
contig59559_44	C	T	TC	TC	TC	CC	CC	TC	TC	TC	TC	CC	TC	TC	CC	TC	TC	CC	TC	TC	CC	TC	CC	CC	CC	TC	TC	TC	CC	TC	CC	CC	CC	TC	CC	CC	CC	CC	TC	CC	TC	CC	TC	CC	TT	CC	TC	CC	CC
contig38211_62	T	G	TT	TT	TT	GT	GT	TT	TT	TT	TT	GT	TT	TT	GT	TT	TT	GT	TT	TT	GT	TT	GT	GT	GT	TT	TT	TT	GT	TT	GT	GT	GT	TT	GT	GT	GT	GT	TT	GT	TT	GT	TT	GT	TT	GT	TT	GT	GT
contig41284_168	A	T	AA	AA	AA	TA	TA	AA	AA	AA	AA	TA	TA	AA	TA	AA	AA	TA	AA	AA	TA	AA	TA	TA	TA	AA	AA	AA	TA	AA	TA	TA	TA	AA	TA	TA	TA	TA	TA	TA	AA	TA	AA	TA	AA	TA	AA	TA	TA
contig33850_138	C	T	CC	TC	TC	CC	CC	TC	TC	TC	TC	CC	TC	TC	CC	TC	TC	CC	TC	TC	CC	TC	CC	CC	CC	TC	TC	TC	CC	TC	CC	CC	CC	TC	CC	CC	CC	CC	TC	CC	TC	CC	TC	CC	TC	CC	TC	CC	CC
contig3286_267	C	T	TC	TC	TC	CC	CC	TC	TC	TC	TC	CC	CC	TC	CC	TC	TC	CC	TC	TC	CC	TC	CC	CC	CC	TC	TC	TC	CC	TC	CC	CC	CC	TC	CC	CC	CC	CC	CC	CC	CC	CC	TC	CC	TC	CC	CC	CC	CC
contig33850_82	A	G	AA	AA	AA	GA	GA	AA	AA	AA	AA	GA	AA	AA	GA	AA	AA	GA	AA	AA	GA	AA	GA	GA	GA	AA	AA	AA	GA	AA	GA	GA	GA	AA	GA	GA	GA	GA	AA	GA	AA	GA	AA	GA	AA	GA	AA	GA	GA
contig41284_176	A	G	GA	GA	GA	AA	AA	GA	GA	GA	GA	AA	AA	GA	AA	GA	GA	AA	GA	GA	AA	GA	AA	AA	AA	GA	GA	GA	AA	GA	AA	AA	AA	GA	AA	AA	AA	AA	AA	AA	GA	AA	GA	AA	GA	AA	GA	AA	AA
contig33850_89	G	A	AG	AG	AG	GG	GG	AG	AG	AG	AG	GG	AG	AG	GG	AG	AG	GG	AG	AG	GG	AG	GG	GG	GG	AG	AG	AG	GG	AG	GG	GG	GG	AG	GG	GG	GG	GG	AG	GG	AG	GG	AG	GG	AG	GG	AG	GG	GG
contig45545_180	G	C	CG	CG	CG	GG	GG	CG	CG	CG	CG	GG	GG	CG	GG	CG	CG	GG	CG	CG	GG	CG	GG	GG	GG	CG	CG	CG	GG	CG	GG	GG	GG	CG	GG	GG	GG	GG	GG	GG	CG	GG	CG	GG	CG	GG	CG	GG	GG
contig38211_101	T	C	TT	TT	TT	CT	CT	TT	TT	TT	TT	CT	TT	TT	CT	TT	TT	CT	TT	TT	CT	TT	CT	CT	CT	TT	TT	TT	CT	TT	CT	CT	CT	TT	CT	CT	CT	CT	TT	CT	TT	CT	TT	CT	TT	CT	TT	CT	CT
contig766776_138	C	T	CC	CC	CC	TC	TC	CC	CC	CC	CC	TC	CC	CC	TC	CC	CC	TC	CC	CC	TC	CC	TC	TC	TC	CC	CC	CC	TC	CC	TC	TC	TC	CC	TC	TC	TC	TC	CC	TC	CC	TC	CC	TC	CC	TC	CC	TC	TC
contig45545_221	A	G	GA	GA	GA	AA	AA	GA	GA	GA	GA	AA	AA	GA	AA	GA	GA	AA	GA	GA	AA	GA	AA	AA	AA	GA	GA	GA	AA	GA	AA	AA	AA	GA	AA	AA	AA	AA	AA	AA	GA	AA	GA	AA	GA	AA	GA	AA	AA
contig3286_122	T	A	AT	AT	AT	TT	TT	AT	AT	AT	AT	TT	TT	AT	TT	AT	AT	TT	AT	AT	TT	AT	TT	TT	TT	AT	AT	AT	TT	AT	TT	TT	TT	AT	TT	TT	TT	TT	TT	TT	TT	TT	AT	TT	AT	TT	TT	TT	TT
contig11031_216	G	A	GG	GG	GG	AG	AG	GG	GG	GG	GG	AG	GG	GG	AG	GG	GG	AG	GG	GG	AG	GG	AG	AG	AG	GG	GG	GG	AG	GG	AG	AG	AG	GG	AG	AG	AG	AG	GG	AG	GG	AG	GG	AG	AA	AG	GG	AG	AG
contig766776_134	T	C	TT	TT	TT	CT	CT	TT	TT	TT	TT	CT	TT	TT	CT	TT	TT	CT	TT	TT	CT	TT	CT	CT	CT	TT	TT	TT	CT	TT	CT	CT	CT	TT	CT	CT	CT	CT	TT	CT	TT	CT	TT	CT	TT	CT	TT	CT	CT
contig766776_106	T	C	CT	CT	CT	TT	TT	CT	CT	CT	CT	TT	CT	CT	TT	CT	CT	TT	CT	CT	TT	CT	TT	TT	TT	CT	CT	CT	TT	CT	TT	TT	TT	CT	TT	TT	TT	TT	CT	TT	CT	TT	CT	TT	CT	TT	CT	TT	TT
contig41284_143	A	T	TA	TA	TA	AA	AA	TA	TA	TA	TA	AA	AA	TA	AA	TA	TA	AA	TA	TA	AA	TA	AA	AA	AA	TA	TA	TA	AA	TA	AA	AA	AA	TA	AA	AA	AA	AA	AA	AA	TA	AA	TA	AA	TA	AA	TA	AA	AA
contig45545_204	G	A	AG	AG	AG	GG	GG	AG	AG	AG	AG	GG	GG	AG	GG	AG	AG	GG	AG	AG	GG	AG	GG	GG	GG	AG	AG	AG	GG	AG	GG	GG	GG	AG	GG	GG	GG	GG	GG	GG	AG	GG	AG	GG	AG	GG	AG	GG	GG
contig71349_103	C	T	CC	CC	CC	TC	TC	CC	CC	CC	CC	TC	CC	CC	TC	CC	CC	TC	CC	CC	TC	CC	TC	TC	TC	CC	CC	CC	TC	CC	TC	TC	TC	CC	TC	TC	TC	TC	CC	TC	CC	TC	CC	TC	CC	TC	CC	TC	TC
contig41284_83	T	A	AT	AT	AT	TT	TT	AT	AT	AT	AT	TT	TT	AT	TT	AT	AT	TT	AT	AT	TT	AT	TT	TT	TT	AT	AT	AT	TT	AT	TT	TT	TT	AT	TT	TT	TT	TT	TT	TT	AT	TT	AT	TT	AT	TT	AT	TT	TT
contig884999_56	C	T	CC	CC	CC	TC	TC	CC	CC	CC	CC	TC	CC	CC	TC	CC	CC	TC	CC	CC	TC	CC	TC	TC	TC	CC	CC	CC	TC	CC	TC	TC	TC	CC	TC	TC	TC	TC	CC	TC	CC	TC	CC	TC	CC	TC	CC	TC	TC
contig658660_26	G	A	GG	GG	GG	AG	AG	GG	GG	GG	GG	AG	AG	GG	AG	GG	GG	AG	GG	GG	AG	GG	AG	AG	AG	GG	GG	GG	AG	GG	AG	AG	AG	GG	AG	AG	AG	AG	GG	AG	GG	AG	GG	AG	GG	AG	GG	AG	AG
contig59559_58	G	A	AG	AG	AG	GG	GG	AG	AG	AG	AG	GG	AG	AG	GG	AG	AG	GG	AG	AG	GG	AG	GG	GG	GG	AG	AG	AG	GG	AG	GG	GG	GG	AG	GG	GG	GG	GG	AG	GG	AG	GG	AG	GG	AA	GG	AG	GG	GG
contig68905_163	C	A	CC	CC	CC	AC	AC	CC	CC	CC	CC	AC	CC	CC	AC	CC	CC	AC	CC	CC	AC	CC	AC	AC	AC	CC	CC	CC	AC	CC	AC	AC	AC	CC	AC	AC	AC	AC	CC	AC	CC	AC	CC	AC	CC	AC	CC	AC	AC
contig3286_141	T	C	CT	CT	CT	TT	TT	CT	CT	CT	CT	TT	TT	CT	TT	CT	CT	TT	CT	CT	TT	CT	TT	TT	TT	CT	CT	CT	TT	CT	TT	TT	TT	CT	TT	TT	TT	TT	TT	TT	TT	TT	CT	TT	CT	TT	TT	TT	TT
contig3286_127	A	C	CA	CA	CA	AA	AA	CA	CA	CA	CA	AA	AA	CA	AA	CA	CA	AA	CA	CA	AA	CA	AA	AA	AA	CA	CA	CA	AA	CA	AA	AA	AA	CA	AA	AA	AA	AA	AA	AA	AA	AA	CA	AA	CA	AA	AA	AA	AA
contig54884_124	G	A	AG	AG	AG	GG	GG	AG	AG	AG	AG	GG	AG	AG	GG	AG	AG	GG	AG	AG	GG	AG	GG	GG	GG	AG	AG	AG	GG	AG	GG	GG	GG	AG	GG	GG	GG	GG	AG	GG	AG	GG	AG	GG	AA	GG	AG	GG	GG
contig59559_72	G	C	CG	CG	CG	GG	GG	CG	CG	CG	CG	GG	CG	CG	GG	CG	CG	GG	CG	CG	GG	CG	GG	GG	GG	CG	CG	CG	GG	CG	GG	GG	GG	CG	GG	GG	GG	GG	CG	GG	CG	GG	CG	GG	CC	GG	CG	GG	GG
contig33850_71	C	T	TC	TC	TC	CC	CC	TC	TC	TC	TC	CC	TC	TC	CC	TC	TC	CC	TC	TC	CC	TC	CC	CC	CC	TC	TC	TC	CC	TC	CC	CC	CC	TC	CC	CC	CC	CC	TC	CC	TC	CC	TC	CC	TC	CC	TC	CC	CC
contig51826_26	A	T	AA	AA	AA	TA	TA	AA	AA	AA	AA	TA	AA	AA	TA	AA	AA	TA	AA	AA	TA	AA	TA	TA	TA	AA	AA	AA	TA	AA	TA	TA	TA	AA	TA	TA	TA	TA	AA	TA	AA	TA	AA	TA	AA	TA	AA	TA	TA
contig45545_210	G	T	TG	TG	TG	GG	GG	TG	TG	TG	TG	GG	GG	TG	GG	TG	TG	GG	TG	TG	GG	TG	GG	GG	GG	TG	TG	TG	GG	TG	GG	GG	GG	TG	GG	GG	GG	GG	GG	GG	TG	GG	TG	GG	TG	GG	TG	GG	GG
contig68905_188	G	A	GG	GG	GG	AG	AG	GG	GG	GG	GG	AG	GG	GG	AG	GG	GG	AG	GG	GG	AG	GG	AG	AG	AG	GG	GG	GG	AG	GG	AG	AG	AG	GG	AG	AG	AG	AG	GG	AG	GG	AG	GG	AG	AG	AG	GG	AG	AG
contig11031_236	A	G	AA	AA	AA	GA	GA	AA	AA	AA	AA	GA	AA	AA	GA	AA	AA	GA	AA	AA	GA	AA	GA	GA	GA	AA	AA	AA	GA	AA	GA	GA	GA	AA	GA	GA	GA	GA	AA	GA	AA	GA	AA	GA	GA	GA	AA	GA	GA
contig68905_76	A	G	GA	GA	GA	AA	AA	GA	GA	GA	GA	AA	GA	GA	AA	GA	GA	AA	GA	GA	AA	GA	AA	AA	AA	GA	GA	GA	AA	GA	AA	AA	AA	GA	AA	AA	AA	AA	GA	AA	GA	AA	GA	AA	GA	AA	GA	AA	AA
contig71349_127	G	A	AG	AG	AG	GG	GG	AG	AG	AG	AG	GG	AG	AG	GG	AG	AG	GG	AG	AG	GG	AG	GG	GG	GG	AG	AG	AG	GG	AG	GG	GG	GG	AG	GG	GG	GG	GG	AG	GG	AG	GG	AG	GG	GG	GG	AG	GG	GG
contig3286_152	T	C	CT	CT	CT	TT	TT	CT	CT	CT	CT	TT	TT	CT	TT	CT	CT	TT	CT	CT	TT	CT	TT	TT	TT	CT	CT	CT	TT	CT	TT	TT	TT	CT	TT	TT	TT	TT	TT	TT	TT	TT	CT	TT	CT	TT	TT	TT	TT
contig41830_91	C	T	TC	CC	CC	TC	CC	CC	CC	TC	CC	CC	TC	CC	TC	TC	CC	TC	TC	CC	CC	TC	TC	CC	CC	CC	CC	TC	TC	TC	CC	TC	TC	CC	TC	TC	TC	CC	TC	CC	TC	CC	CC	CC	TC	CC	TC	TC	TC
contig11031_155	T	C	TT	TT	TT	CT	CT	TT	TT	TT	TT	CT	TT	TT	CT	TT	TT	CT	TT	TT	CT	TT	CT	CT	CT	TT	TT	TT	CT	TT	CT	CT	CT	TT	CT	CT	CT	CT	TT	CT	TT	CT	TT	CT	TT	CT	TT	CT	CT
contig3286_202	G	A	AG	AG	AG	GG	GG	AG	AG	AG	AG	GG	GG	AG	GG	AG	AG	GG	AG	AG	GG	AG	GG	GG	GG	AG	AG	AG	GG	AG	GG	GG	GG	AG	GG	GG	GG	GG	GG	GG	GG	GG	AG	GG	AG	GG	GG	GG	GG
contig884999_28	A	C	AA	AA	AA	CA	CA	AA	AA	AA	AA	CA	AA	AA	CA	AA	AA	CA	AA	AA	CA	AA	CA	CA	CA	AA	AA	AA	CA	AA	CA	CA	CA	AA	CA	CA	CA	CA	AA	CA	AA	CA	AA	CA	AA	CA	AA	CA	CA
contig11031_218	A	T	AA	AA	AA	TA	TA	AA	AA	AA	AA	TA	AA	AA	TA	AA	AA	TA	AA	AA	TA	AA	TA	TA	TA	AA	AA	AA	TA	AA	TA	TA	TA	AA	TA	TA	TA	TA	AA	TA	AA	TA	AA	TA	AA	TT	AA	TA	TA
contig22477_140	C	T	CC	CC	CC	TC	TC	CC	CC	CC	CC	TC	CC	CC	TC	CC	CC	TC	CC	CC	TC	CC	TC	TC	TC	CC	CC	CC	TC	CC	TC	TC	TC	CC	TC	TC	TC	TC	CC	TC	CC	TC	CC	TC	CC	TT	CC	TC	TC
contig514019_126	T	C	CT	TT	TT	CT	TT	TT	TT	CT	TT	TT	CT	TT	CT	CT	TT	CT	CT	TT	TT	CT	TT	TT	TT	TT	TT	CT	CT	CT	TT	CT	CT	TT	CT	CT	CT	TT	CT	TT	CT	TT	TT	TT	CT	TT	CT	CT	CT
contig22477_144	C	T	CC	CC	CC	TC	TC	CC	CC	CC	CC	TC	CC	CC	TC	CC	CC	TC	CC	CC	TC	CC	TC	TC	TC	CC	CC	CC	TC	CC	TC	TC	TC	CC	TC	TC	TC	TC	CC	TC	CC	TC	CC	TC	CC	TT	CC	TC	TC
contig514019_30	C	T	TC	CC	CC	TC	CC	CC	CC	TC	CC	CC	TC	CC	TC	TC	CC	TC	TC	CC	CC	TC	CC	CC	CC	CC	CC	TC	TC	TC	CC	TC	TC	CC	TC	TC	TC	CC	TC	CC	TC	CC	CC	CC	TC	CC	TC	TC	TC
contig41830_76	C	T	TC	CC	CC	TC	CC	CC	CC	TC	CC	CC	TC	CC	TC	TC	CC	TC	TC	CC	CC	TC	CC	CC	CC	CC	CC	TC	TC	TC	CC	TC	TC	CC	TC	TC	TC	CC	TC	CC	TC	CC	CC	CC	TC	CC	TC	TC	TC
contig398333_57	T	A	AT	AT	AT	TT	TT	AT	AT	AT	AT	TT	AT	AT	TT	AT	AT	TT	AT	AT	TT	AT	TT	TT	TT	AT	AT	AT	TT	AT	TT	TT	TT	AT	TT	TT	TT	TT	AT	TT	AT	TT	AT	TT	TT	TT	AT	TT	TT
contig55714_137	A	G	AA	AA	AA	GA	GA	AA	AA	AA	AA	GA	AA	AA	GA	AA	AA	GA	AA	AA	GA	AA	GA	GA	GA	AA	AA	AA	GA	AA	GA	GA	GA	AA	GA	GA	GA	GA	AA	GA	AA	GA	AA	GA	GA	GA	AA	GA	GA
contig398333_142	T	C	TT	TT	TT	CT	CT	TT	TT	TT	TT	CT	TT	TT	CT	TT	TT	CT	TT	TT	CT	TT	CT	CT	CT	TT	TT	TT	CT	TT	CT	CT	CT	TT	CT	CT	CT	CT	TT	CT	TT	CT	TT	CT	CT	CT	TT	CT	CT
contig25759_14	G	T	GG	GG	GG	TG	TG	GG	GG	GG	GG	TG	GG	GG	TG	GG	GG	TG	GG	GG	TG	GG	TG	TG	TG	GG	GG	GG	TG	GG	TG	TG	TG	GG	TG	TG	TG	TG	GG	TG	GG	TG	GG	TG	GG	TG	GG	TG	TG
contig545223_22	T	A	TT	TT	TT	AT	AT	TT	TT	TT	TT	AT	TT	TT	AT	TT	TT	AT	TT	TT	AT	TT	AT	AT	AT	TT	TT	TT	AT	TT	AT	AT	AT	TT	AT	AT	AT	AT	TT	AT	TT	AT	TT	AT	AT	AT	TT	AT	AT
contig55714_182	T	C	TT	TT	TT	CT	CT	TT	TT	TT	TT	CT	TT	TT	CT	TT	TT	CT	TT	TT	CT	TT	CT	CT	CT	TT	TT	TT	CT	TT	CT	CT	CT	TT	CT	CT	CT	CT	TT	CT	TT	CT	TT	CT	CT	CT	TT	CT	CT
contig398333_111	C	T	TC	TC	TC	CC	CC	TC	TC	TC	TC	CC	TC	TC	CC	TC	TC	CC	TC	TC	CC	TC	CC	CC	CC	TC	TC	TC	CC	TC	CC	CC	CC	TC	CC	CC	CC	CC	TC	CC	TC	CC	TC	CC	CC	CC	TC	CC	CC
contig533857_134	G	A	GG	GG	GG	AG	AG	GG	GG	GG	GG	AG	GG	GG	AG	GG	GG	AG	GG	GG	AG	GG	AG	AG	AG	GG	GG	GG	AG	GG	AG	AG	AG	GG	AG	AG	AG	AG	GG	AG	GG	AG	GG	AG	AG	AG	GG	AG	AG
contig55714_51	A	G	GA	GA	GA	AA	AA	GA	GA	GA	GA	AA	GA	GA	AA	GA	GA	AA	GA	GA	AA	GA	AA	AA	AA	GA	GA	GA	AA	GA	AA	AA	AA	GA	AA	AA	AA	AA	GA	AA	GA	AA	GA	AA	AA	AA	GA	AA	AA
contig724673_171	C	A	AC	AC	AC	CC	CC	AC	AC	AC	AC	CC	AC	AC	CC	AC	AC	CC	AC	CC	CC	AC	CC	CC	CC	CC	AC	CC	CC	CC	CC	CC	CC	CC	CC	CC	CC	CC	AC	CC	AC	CC	AC	CC	CC	CC	CC	CC	CC
contig724673_147	C	T	TC	TC	TC	CC	CC	TC	TC	TC	TC	CC	TC	TC	CC	TC	TC	CC	TC	CC	CC	TC	CC	CC	CC	CC	TC	CC	CC	CC	CC	CC	CC	CC	CC	CC	CC	CC	TC	CC	TC	CC	TC	CC	CC	CC	CC	CC	CC
contig724673_162	C	T	TC	TC	TC	CC	CC	TC	TC	TC	TC	CC	TC	TC	CC	TC	TC	CC	TC	CC	CC	TC	CC	CC	CC	CC	TC	CC	CC	CC	CC	CC	CC	CC	CC	CC	CC	CC	TC	CC	TC	CC	TC	CC	CC	CC	CC	CC	CC
contig724673_172	T	C	CT	CT	CT	TT	TT	CT	CT	CT	CT	TT	CT	CT	TT	CT	CT	TT	CT	TT	TT	CT	TT	TT	TT	TT	CT	TT	TT	TT	TT	TT	TT	TT	TT	TT	TT	TT	CT	TT	CT	TT	CT	TT	TT	TT	TT	TT	TT
contig724673_182	C	A	AC	AC	AC	CC	CC	AC	AC	AC	AC	CC	AC	AC	CC	AC	AC	CC	AC	CC	CC	AC	CC	CC	CC	CC	AC	CC	CC	CC	CC	CC	CC	CC	CC	CC	CC	CC	AC	CC	AC	CC	AC	CC	CC	CC	CC	CC	CC
contig40481_10	G	C	CG	CC	GG	CC	GG	CC	CG	CC	CG	CC	CC	CG	GG	CC	CG	GG	GG	GG	CG	CC	CG	CG	CG	CC	CG	GG	GG	CG	CG	GG	GG	GG	GG	CG	GG	CG	GG	CG	CG	CC	CG	CC	CG	CG	CC	CG	CC
contig1108_112	C	T	TC	CC	CC	TC	CC	CC	TC	CC	CC	CC	TC	CC	TC	TC	CC	TC	TC	CC	CC	TC	CC	CC	CC	CC	CC	TC	TC	TC	CC	TC	TC	CC	CC	TC	TC	CC	TC	CC	TC	CC	CC	CC	TC	CC	TC	TC	TC
contig514019_111	G	A	GG	AA	AA	GG	AA	AG	AG	AG	AG	AG	GG	AG	GG	GG	AG	AG	AG	AG	AA	GG	AA	AA	AA	AG	AA	AG	AG	GG	AG	AG	AG	AA	AG	GG	AG	AG	AG	AG	AG	AG	AG	AG	GG	AG	AG	AG	GG
contig17615_58	G	A	AG	GG	GG	AG	GG	GG	AG	GG	AG	AG	AG	AG	AG	AG	AG	GG	GG	AG	GG	AG	GG	GG	GG	AG	GG	GG	GG	AG	AG	GG	GG	GG	GG	AG	GG	AG	GG	AG	GG	AG	AG	AG	AG	AG	GG	AG	AG
contig80284_96	G	A	GG	AA	AA	AA	AA	AG	AG	AG	AG	GG	GG	AG	GG	GG	AG	AG	AG	AA	AA	GG	AA	AG	AG	AG	AG	AG	AG	GG	AG	AG	AG	AA	AG	GG	AG	AG	AG	AG	AA	AG	AG	AG	GG	AG	AG	AG	GG
contig26848_138	C	G	CC	GG	GG	GG	GG	GC	GC	GC	GC	CC	CC	GC	CC	CC	GC	GC	GC	GG	GG	CC	GG	GC	GC	GC	CC	GC	GG	CC	GC	GC	GC	GG	GC	CC	GC	GC	GC	GC	GC	GC	GC	GC	CC	GC	GC	GC	CC
contig26848_167	T	C	TT	CC	CC	CC	CC	CT	CT	CT	CT	TT	TT	CT	TT	TT	CT	CT	CT	CC	CC	TT	CC	CT	CT	CT	TT	CT	CC	TT	CT	CT	CT	CC	CT	TT	CT	CT	CT	CT	CT	CT	CT	CT	TT	CT	CT	CT	TT
contig80284_15	A	T	TA	AA	AA	AA	AA	AA	AA	TA	AA	TA	TA	AA	TA	TA	AA	TA	TA	AA	AA	TA	AA	AA	AA	AA	AA	TA	TA	TA	AA	TA	TA	AA	TA	TA	TA	AA	TA	AA	AA	AA	AA	AA	AA	AA	TA	AA	TA
contig26848_96	G	T	GG	TT	TT	TT	TT	TG	TG	TG	TG	GG	GG	TG	GG	GG	TG	TG	TG	TT	TT	GG	TT	TG	TG	TG	GG	TG	TT	GG	TG	TG	TG	TT	TG	GG	TG	TG	TG	TG	TG	TG	TG	TG	GG	GG	TG	TG	GG
contig26848_166	G	T	GG	TT	TT	TT	TT	TG	TG	TG	TG	GG	GG	TG	GG	GG	TG	TG	TG	TT	TT	GG	TT	TG	TG	TG	GG	TG	TT	GG	TG	TG	TG	TT	TG	GG	TG	TG	TG	TG	TG	TG	TG	TG	GG	GG	TG	TG	GG
contig26848_149	C	T	TC	CC	CC	CC	CC	CC	CC	TC	CC	TC	TC	CC	TC	TC	CC	TC	TC	CC	CC	TC	CC	CC	CC	CC	TC	TC	CC	TC	CC	TC	TC	CC	TC	TC	TC	CC	TC	CC	CC	CC	CC	CC	TC	CC	TC	CC	TC
contig450641_76	C	T	TC	CC	CC	CC	CC	CC	CC	TC	CC	TC	TC	CC	TC	TC	CC	TC	TC	CC	CC	TC	CC	CC	CC	CC	TC	TC	CC	TC	CC	TC	TC	CC	TC	TC	TC	CC	TC	CC	CC	CC	CC	CC	TC	CC	TC	TC	TC
contig450641_110	C	T	CC	TT	TT	TT	TT	TC	TC	TC	TC	CC	CC	TC	CC	CC	TC	TC	TC	TT	TT	CC	TT	TC	TC	TC	CC	TC	TT	CC	TC	TC	TC	TT	TC	CC	TC	TC	TC	TC	TC	TC	TC	TT	CC	CC	TC	TC	CC
contig25808_41	C	T	TC	CC	CC	CC	CC	CC	CC	TC	CC	TC	TC	CC	TC	TC	CC	TC	TC	CC	CC	TC	CC	CC	CC	CC	TC	TC	CC	TC	CC	CC	TC	CC	TC	TC	TC	CC	TC	CC	CC	CC	CC	CC	TC	CC	TC	TC	TC
contig25808_37	T	C	CT	TT	TT	TT	TT	TT	TT	CT	TT	CT	CT	TT	CT	CT	TT	CT	CT	TT	TT	CT	TT	TT	TT	TT	CT	CT	TT	CT	TT	TT	CT	TT	CT	CT	CT	TT	CT	TT	TT	TT	TT	TT	CT	TT	CT	CT	CT
contig46862_42	C	T	TC	CC	CC	CC	CC	CC	CC	TC	CC	TC	TT	CC	TC	TC	CC	TT	TC	CC	CC	TC	CC	CC	CC	CC	TC	TC	CC	TC	CC	CC	TC	CC	TC	TC	TC	CC	TC	CC	CC	CC	CC	CC	TC	CC	TC	TT	TC
contig25808_187	G	A	AG	GG	GG	GG	GG	GG	GG	AG	GG	AG	AG	GG	AG	AG	GG	AG	AG	GG	GG	AG	GG	GG	GG	GG	AG	AG	GG	AG	GG	GG	AG	GG	AG	AG	AG	GG	AG	GG	GG	GG	GG	GG	AG	GG	AG	AG	AG
contig46862_174	A	G	GA	AA	AA	AA	AA	AA	AA	GA	AA	GA	GG	AA	GA	GA	AA	GG	GA	AA	AA	GA	AA	AA	AA	AA	GA	GA	AA	GA	AA	AA	GA	AA	GA	GA	GA	AA	GA	AA	AA	AA	AA	AA	GA	AA	GA	GA	GA
contig25808_265	G	A	AG	GG	GG	GG	GG	GG	GG	AG	GG	AG	AG	GG	AG	AG	GG	AG	AG	GG	GG	AG	GG	GG	GG	GG	AG	AG	GG	AG	GG	GG	AG	GG	AG	AG	AG	GG	AG	GG	GG	GG	GG	GG	AG	AG	AG	AG	AG
contig561612_17	C	A	AC	CC	CC	CC	CC	CC	CC	AC	CC	AC	AC	CC	AC	AC	CC	AC	AC	CC	CC	AC	CC	CC	CC	CC	AC	AC	CC	AC	CC	AC	AC	CC	AC	AC	AC	CC	AC	CC	CC	CC	CC	CC	AC	AC	AC	AC	AC
contig66249_54	C	A	AC	CC	CC	CC	CC	CC	CC	AC	CC	AC	AC	CC	AC	AC	CC	AC	AC	CC	CC	AC	CC	CC	CC	CC	AC	AC	CC	AC	CC	CC	AC	CC	AC	AC	AC	CC	AC	CC	CC	CC	CC	CC	AC	AC	AC	AC	AC
contig40554_36	T	G	GT	TT	TT	TT	TT	TT	TT	GT	TT	GT	GT	TT	GT	GT	TT	GT	GT	TT	TT	GT	TT	TT	TT	TT	GT	GT	TT	GT	TT	TT	GT	TT	GT	GT	GT	TT	GT	TT	TT	TT	TT	TT	GT	GT	GT	GT	GT
contig46862_151	C	T	CC	TT	TT	TT	TT	TC	TC	TC	TC	CC	CC	TC	CC	CC	TC	TC	TC	TT	TT	CC	TT	TC	TT	TC	CC	TC	TT	CC	TC	TT	TC	TT	TC	CC	TC	TC	TC	TC	TC	TC	TC	TC	TC	CC	TC	TC	CC
contig29396_95	G	A	AG	GG	GG	GG	GG	GG	GG	AA	GG	AG	AG	GG	AG	AG	GG	AA	AA	GG	GG	AG	GG	GG	GG	GG	AG	AA	GG	AG	GG	GG	AA	GG	AA	AG	AA	GG	AA	GG	GG	GG	GG	GG	AG	AG	AA	AG	AG
contig46862_39	C	T	CC	TT	TT	TT	TT	TC	TC	TC	TC	CC	CC	TC	CC	CC	TC	TC	TC	TT	TT	CC	TT	TC	TT	TC	CC	TC	TT	CC	TC	TT	TC	TT	TC	CC	TC	TC	TC	TC	TC	TC	TC	TC	TC	CC	TC	TC	CC
contig66249_107	T	A	TT	AA	AA	AA	AA	AT	AT	AT	AT	TT	TT	AT	TT	TT	AT	AT	AT	AA	AA	TT	AA	AT	AT	AT	TT	AT	AA	TT	AT	AA	AT	AA	AT	TT	AT	AT	AT	AT	AT	AT	AT	AT	AT	TT	AT	AT	TT
contig29396_75	A	G	GA	AA	AA	AA	AA	AA	AA	GG	AA	GA	GA	AA	GA	GA	AA	GG	GG	AA	AA	GA	AA	AA	AA	AA	GA	GG	AA	GA	AA	AA	GG	AA	GG	GA	GG	AA	GG	AA	AA	AA	AA	AA	GA	GA	GG	GA	GA
contig356885_87	G	A	GG	AA	AA	AA	AA	AG	AG	AG	AG	GG	GG	AG	AG	GG	AG	AG	AG	AA	AG	GG	AA	AG	AA	AG	GG	AG	AA	GG	AG	AA	AG	AA	AG	GG	AG	AG	AG	AG	AG	AG	AG	AG	AG	AG	AG	AG	GG
contig7906_148	A	G	AA	GG	GG	GG	GG	GA	GA	GA	GA	AA	AA	GA	AA	AA	GA	GA	GA	GG	GG	AA	GG	GA	GA	GA	AA	GA	GG	AA	GA	GG	GA	GG	GA	AA	GA	GA	GA	GA	GA	GA	GA	GA	GA	GA	GA	GA	AA
contig46862_158	C	A	CC	AA	AA	AA	AA	AC	AC	AC	AC	CC	CC	AC	CC	CC	AC	AC	AC	AA	AA	CC	AA	AC	AA	AC	CC	AC	AA	CC	AC	AA	AC	AA	AC	CC	AC	AC	AC	AC	AC	AC	AC	AC	AC	CC	AC	AC	CC
contig38463_104	A	G	GA	AA	AA	AA	AA	AA	AA	GA	AA	GA	GA	AA	GA	GA	AA	GA	GA	AA	AA	GA	AA	AA	AA	AA	GA	GA	AA	GA	AA	AA	GA	AA	GA	GA	GA	AA	GA	AA	AA	AA	AA	AA	GA	GA	GA	GA	GA
contig29396_159	C	A	AC	CC	CC	CC	CC	CC	CC	AA	CC	AC	AC	CC	AC	AC	CC	AA	AA	CC	CC	AC	CC	CC	CC	CC	AC	AA	CC	AC	CC	CC	AA	CC	AA	AC	AA	CC	AA	CC	CC	CC	CC	CC	AC	AC	AA	AC	AC
contig40554_147	A	T	TA	AA	AA	AA	AA	AA	AA	TA	AA	TA	TA	AA	TA	TA	AA	TA	TA	AA	AA	TA	AA	AA	AA	AA	TA	TA	AA	TA	AA	AA	TA	AA	TA	TA	TA	AA	TA	AA	AA	AA	AA	AA	TA	TA	TA	TA	TA
contig66249_20	A	G	AA	GG	GG	GG	GG	GA	GA	GA	GA	AA	AA	GA	AA	AA	GA	GA	GA	GG	GG	AA	GG	GA	GA	GA	AA	GA	GG	AA	GA	GG	GA	GG	GA	AA	GA	GA	GA	GA	GA	GA	GA	GA	GA	AA	GA	GA	AA
contig535543_70	G	A	AG	GG	GG	GG	GG	AG	AG	GG	AG	AG	AG	AG	AG	AG	AG	GG	GG	GG	GG	AG	GG	AG	AG	AG	AG	GG	GG	AG	AG	GG	GG	GG	GG	AG	GG	AG	GG	AG	GG	AG	AG	AG	AG	AG	GG	AG	AG
contig40554_135	G	A	AG	GG	GG	GG	GG	GG	GG	AG	GG	AG	AG	GG	AG	AG	GG	AG	AG	GG	GG	AG	GG	GG	GG	GG	AG	AG	GG	AG	GG	GG	AG	GG	AG	AG	AG	GG	AG	GG	GG	GG	GG	GG	AG	AG	AG	AG	AG
contig40554_140	A	G	AA	GG	GG	GG	GG	GA	GA	GA	GA	AA	AA	GA	AA	AA	GA	GA	GA	GG	GG	AA	GG	GA	GA	GA	AA	GA	GG	AA	GA	GG	GA	GG	GA	AA	GA	GA	GA	GA	GA	GA	GA	GA	AA	AA	GA	AA	AA
contig356885_82	G	T	TG	GG	GG	GG	GG	GG	GG	TG	GG	TG	TG	GG	TG	TG	GG	TG	TG	GG	GG	TG	GG	GG	GG	GG	TG	TG	GG	TG	GG	GG	TG	GG	TG	TT	TG	GG	TG	GG	GG	GG	GG	GG	TT	TG	TG	TT	TG
contig535543_82	G	T	TG	GG	GG	GG	GG	TG	TG	GG	TG	TG	TG	TG	TG	TG	TG	GG	GG	GG	GG	TG	GG	TG	TG	TG	TG	GG	GG	TG	TG	GG	GG	GG	GG	TG	GG	TG	GG	TG	GG	TG	TG	TG	TG	TG	GG	TG	TG
contig46862_57	C	T	TC	CC	CC	CC	CC	CC	CC	TC	CC	TC	TT	CC	TC	TC	CC	TT	TC	CC	CC	TC	CC	CC	CC	CC	TC	TC	CC	TC	CC	CC	TC	CC	TC	TC	TC	CC	TC	CC	CC	CC	CC	CC	TC	TC	TC	TC	TC
contig66249_115	C	T	TC	CC	CC	CC	CC	TC	TC	CC	TC	TC	TC	TC	TC	TC	TC	CC	CC	CC	CC	TC	CC	TC	TC	TC	TC	CC	CC	TC	TC	CC	CC	CC	CC	TC	CC	TC	CC	TC	TC	TC	TC	TC	TC	TC	CC	TC	TC
contig25808_175	G	A	GG	AA	AA	AA	AA	AG	AG	AG	AG	GG	GG	AG	GG	GG	AG	AG	AG	AA	AG	GG	AA	AG	AG	AG	GG	AG	AA	GG	AG	AA	AG	AA	AG	GG	AG	AG	AG	AG	AG	AG	AG	AG	GG	GG	AG	GG	GG
contig38463_76	T	A	TT	AA	AA	AA	AA	AT	AT	AT	AT	TT	TT	AT	TT	TT	AT	AT	AA	AA	AA	TT	AA	AT	AT	AT	TT	AT	AA	TT	AT	AA	AT	AA	AT	TT	AT	AT	AT	AT	AT	AT	AT	AT	TT	TT	AT	TT	TT
contig15608_77	A	T	TA	AA	AA	AA	AA	TA	TA	AA	TA	TA	TA	TA	TA	TA	TA	AA	AA	AA	AA	TA	AA	TA	TA	TA	TA	AA	AA	TA	TA	AA	AA	AA	AA	TA	AA	TA	AA	TA	TA	TA	TA	TA	TA	TA	AA	TA	TA
contig46862_40	C	A	AC	CC	CC	CC	CC	AC	AC	CC	AC	AC	CC	AC	AC	AC	AC	CC	CC	CC	CC	AC	CC	AC	CC	AC	AC	CC	CC	AC	AC	CC	CC	CC	CC	AC	CC	AC	CC	AC	AC	AC	AC	AC	AC	AC	CC	AC	AC
contig434348_73	T	C	CC	TT	TT	TT	TT	CT	CT	TT	CT	CC	CC	CT	CC	CC	CT	TT	TT	TT	TT	CC	TT	CT	CT	CT	CC	TT	TT	CC	CT	TT	TT	TT	TT	CC	TT	CT	TT	CT	CT	CT	CT	CT	CT	CT	TT	CT	CC
contig561612_102	A	G	GA	AA	AA	AA	AA	GA	GA	AA	GA	GA	GA	GA	GA	GA	GA	AA	AA	AA	AA	GA	AA	GA	GA	GA	GA	AA	AA	GA	GA	AA	AA	AA	AA	GA	AA	GA	AA	GA	GA	GA	GA	GA	GA	GA	AA	GA	GA
contig434348_26	T	A	AA	TT	TT	TT	TT	AT	AT	TT	AT	AA	AA	AT	AA	AA	AT	TT	TT	TT	TT	AA	TT	AT	AT	AT	AA	TT	TT	AA	AT	TT	TT	TT	TT	AT	TT	AT	TT	AT	AT	AT	AT	AT	AT	AT	TT	AT	AA
contig15608_167	A	T	TA	AA	AA	AA	AA	TA	TA	AA	TA	TA	TA	TA	TA	TA	TA	AA	AA	AA	AA	TA	AA	TA	TA	TA	TA	AA	AA	TA	TA	AA	AA	AA	AA	TA	AA	TA	AA	TA	TA	TA	TA	TA	TA	TA	AA	TA	TA
contig46862_203	T	C	CT	TT	TT	TT	TT	CT	CT	TT	CT	CT	TT	CT	CT	CT	CT	TT	TT	TT	TT	CT	TT	CT	TT	CT	CT	TT	TT	CT	CT	TT	TT	TT	TT	CT	TT	CT	TT	CT	CT	CT	CT	CT	CT	CT	TT	CT	CT
contig46862_154	T	C	CT	TT	TT	TT	TT	CT	CT	TT	CT	CT	TT	CT	CT	CT	CT	TT	TT	TT	TT	CT	TT	CT	TT	CT	CT	TT	TT	CT	CT	TT	TT	TT	TT	CT	TT	CT	TT	CT	CT	CT	CT	CT	TT	CT	TT	CT	CT
contig66249_66	A	G	GA	AA	AA	AA	AA	GA	GA	AA	GA	GA	GA	GA	GA	GA	GA	AA	AA	AA	AA	GA	AA	GA	GA	GA	GA	AA	AA	GA	GA	AA	AA	AA	AA	GA	AA	GA	AA	GA	GA	GA	GA	GA	GA	AA	AA	GA	GA
contig46862_37	C	T	TC	CC	CC	CC	CC	TC	TC	CC	TC	TC	CC	TC	TC	TC	TC	CC	CC	CC	CC	TC	CC	TC	CC	TC	TC	CC	CC	TC	TC	CC	CC	CC	CC	TC	CC	TC	CC	TC	TC	TC	TC	TC	TC	CC	CC	TC	TC
contig25808_223	A	T	TA	AA	AA	AA	AA	TA	TA	AA	TA	TA	TA	TA	TA	TA	TA	AA	AA	AA	TA	TA	AA	TA	TA	TA	TA	AA	AA	TA	TA	AA	AA	AA	AA	TA	AA	TA	AA	TA	TA	TA	TA	TA	TA	AA	AA	TA	TA
contig404765_119	G	A	AG	GG	GG	GG	GG	GG	GG	AG	GG	AG	AG	GG	GG	AG	GG	GG	AG	GG	GG	AG	GG	GG	GG	GG	AG	AG	GG	AG	GG	GG	AG	GG	AG	GG	AG	GG	AG	GG	GG	GG	GG	GG	AG	AG	GG	AG	AG
contig356885_80	G	A	AG	GG	GG	GG	GG	AG	AG	GG	AG	AG	AG	AG	GG	AG	AG	GG	GG	GG	AG	AG	GG	AG	GG	AG	AG	GG	GG	AG	AG	GG	GG	GG	GG	AG	GG	AG	GG	AG	AG	AG	AG	AG	GG	GG	GG	AG	AG
contig356885_29	C	A	AC	CC	CC	CC	CC	AC	AC	CC	AC	AC	AC	AC	CC	AC	AC	CC	CC	CC	AC	AC	CC	AC	CC	AC	AC	CC	CC	AC	AC	CC	CC	CC	CC	AC	CC	AC	CC	AC	AC	AC	AC	AC	AC	CC	CC	AC	AC
contig25808_119	C	T	TC	CC	CC	CC	CC	TC	TC	CC	TC	TC	TC	TC	CC	TC	TC	CC	CC	CC	TC	TC	CC	TC	TC	TC	TC	CC	CC	TC	TC	CC	CC	CC	CC	TC	CC	TC	CC	TC	TC	TC	TC	TC	TC	TC	CC	TC	TC
contig819321_62	T	C	TT	CC	CC	CC	CC	CT	CT	CT	CT	TT	TT	CT	CT	TT	CT	CC	CC	CC	CT	TT	CC	TT	CT	CT	TT	CT	CC	TT	CT	CC	CC	CC	CT	TT	CT	CT	CT	CT	CT	CT	CT	CT	TT	TT	CT	TT	TT
contig25808_218	A	C	CA	AA	AA	AA	AA	CA	CA	AA	CA	CA	CA	CA	AA	CA	CA	AA	AA	AA	CA	CA	AA	CA	CA	CA	CA	AA	AA	CA	CA	AA	AA	AA	AA	CA	AA	CA	AA	CA	CA	CA	CA	CA	CA	CA	AA	CA	CA
contig970105_32	A	G	GA	AA	AA	AA	AA	GA	GA	AA	GA	GA	GA	GA	AA	GA	GA	AA	AA	AA	GA	GA	AA	GA	GA	GA	GA	AA	AA	GA	GA	AA	AA	AA	AA	GA	AA	GA	AA	GA	GA	GA	GA	GA	GA	GA	AA	GA	GA
contig970105_43	C	T	TC	CC	CC	CC	CC	TC	TC	CC	TC	TC	TC	TC	CC	TC	TC	CC	CC	CC	TC	TC	CC	TC	TC	TC	TC	CC	CC	TC	TC	CC	CC	CC	CC	TC	CC	TC	CC	TC	TC	TC	TC	TC	TC	TC	CC	TC	TC
contig970105_23	G	A	AG	GG	GG	GG	GG	AG	AG	GG	AG	AG	AG	AG	GG	AG	AG	GG	GG	GG	AG	AG	GG	AG	AG	AG	AG	GG	GG	AG	AG	GG	GG	GG	GG	AG	GG	AG	GG	AG	AG	AG	AG	AG	AG	AG	GG	AG	AG
contig819321_84	C	A	AC	CC	CC	CC	CC	AC	AC	CC	AC	AC	AC	AC	CC	AC	AC	CC	CC	CC	AC	AC	CC	AC	AC	AC	AC	CC	CC	AC	AC	CC	CC	CC	CC	AC	CC	AC	CC	AC	AC	AC	AC	AC	AC	AC	CC	AC	AC
contig47208_227	G	A	AG	GG	GG	GG	GG	GG	GG	AG	GG	AG	AG	GG	GG	AG	GG	GG	AG	GG	GG	AG	GG	GG	GG	GG	AG	AG	GG	AG	GG	GG	AG	GG	AG	AG	AG	GG	AG	GG	GG	AG	GG	GG	AG	AG	AG	AG	AG
contig819321_70	T	C	CT	TT	TT	TT	TT	CT	CT	TT	CT	CT	CT	CT	TT	CT	CT	TT	TT	TT	CT	CT	TT	CT	CT	CT	CT	TT	TT	CT	CT	TT	TT	TT	TT	CT	TT	CT	TT	CT	CT	CT	CT	CT	CT	CT	TT	CT	CT
contig47208_2	T	G	GT	TT	TT	TT	TT	TT	TT	GT	TT	GT	GT	TT	TT	GT	TT	TT	GT	TT	TT	GT	TT	TT	TT	TT	GT	GT	TT	GT	TT	TT	GT	TT	GT	GT	GT	TT	GT	TT	TT	GT	TT	TT	GT	GT	GT	GT	GT
contig47208_146	G	T	TG	GG	GG	GG	GG	GG	GG	TG	GG	TG	TG	GG	GG	TG	GG	GG	TG	GG	GG	TG	GG	GG	GG	GG	TG	TG	GG	TG	GG	GG	TG	GG	TG	TG	TG	GG	TG	GG	GG	TG	GG	GG	TG	TG	TG	TG	TG
contig47208_121	T	C	TT	CC	CC	CC	CC	CT	CT	CT	CT	TT	TT	CT	CC	TT	CT	CC	CT	CC	CT	TT	CC	CT	CT	CT	TT	CC	CC	TT	CT	CC	CT	CC	CC	TT	CT	CT	CT	CT	CT	TT	CT	CT	TT	TT	CT	TT	TT
contig47208_189	G	T	TG	GG	GG	GG	GG	GG	GG	TG	GG	TG	TG	GG	GG	TG	GG	GG	TG	GG	GG	TG	GG	GG	GG	GG	TG	TG	GG	TG	GG	GG	TG	GG	TG	TG	TG	GG	TG	GG	GG	TG	GG	GG	GG	GG	TG	GG	TG
contig47208_178	C	T	CC	TT	TT	TT	TT	TC	TC	TC	TC	CC	CC	TC	TT	CC	TC	TT	TC	TT	TC	CC	TT	TC	TC	TC	CC	TT	TT	CC	TC	TT	TC	TT	TT	CC	TC	TC	TC	TC	TC	CC	TC	TC	CC	CC	TC	CC	CC
contig47208_201	C	A	AC	CC	CC	CC	CC	CC	CC	AC	CC	AC	AC	CC	CC	AC	CC	CC	AC	CC	CC	AC	CC	CC	CC	CC	AC	CC	CC	AC	CC	CC	AC	CC	CC	AC	AC	CC	AC	CC	CC	AC	CC	CC	CC	CC	AC	CC	AC
contig47208_157	A	C	AA	CC	CC	CC	CC	CA	CA	CA	CA	AA	AA	CA	CC	AA	CA	CC	CA	CC	CA	AA	CC	CA	CA	CA	AA	AA	CC	AA	CA	CC	CA	CC	AA	AA	CA	CA	CA	CA	CA	AA	CA	CA	AA	AA	CA	AA	AA
contig47208_207	C	A	AC	CC	CC	CC	CC	CC	CC	AC	CC	AC	AC	CC	CC	AC	CC	CC	AC	CC	CC	AC	CC	CC	CC	CC	AC	CC	CC	AC	CC	CC	AC	CC	CC	AC	AC	CC	AC	CC	CC	AC	CC	CC	CC	CC	AC	CC	AC
contig47208_176	A	T	AA	TT	TT	TT	TT	TA	TA	TA	TA	AA	AA	TA	TT	AA	TA	TT	TA	TT	TA	AA	TT	TA	TA	TA	AA	TT	TT	AA	TA	TT	TA	TT	TT	AA	TA	TA	TA	TA	TA	AA	TA	TA	AA	AA	TA	AA	AA
contig47208_221	T	C	TT	CC	CC	CC	CC	CT	CT	CT	CT	TT	TT	CT	CC	TT	CT	CC	CT	CC	CT	TT	CC	CT	CT	CT	TT	CT	CC	TT	CT	CC	CT	CC	CT	TT	CT	CT	CT	CT	CT	TT	CT	CT	TT	TT	CT	TT	TT
contig47208_196	A	G	AA	GG	GG	GG	GG	GA	GA	GA	GA	AA	AA	GA	GG	AA	GA	GG	GA	GG	GA	AA	GG	GA	GA	GA	AA	GA	GG	AA	GA	GG	GA	GG	GA	AA	GA	GA	GA	GA	GA	AA	GA	GA	AA	AA	GA	AA	AA
contig47208_149	T	A	TT	AA	AA	AA	AA	AT	AT	AT	AT	TT	TT	AT	AA	TT	AT	AA	AT	AA	AT	TT	AA	AT	AT	AT	TT	AA	AA	TT	AT	AA	AT	AA	AA	TT	AT	AT	AT	AT	AT	TT	AT	AT	TT	TT	AT	TT	TT
contig47208_145	T	C	TT	CC	CC	CC	CC	CT	CT	CT	CT	TT	TT	CT	CC	TT	CT	CC	CT	CC	CT	TT	CC	CT	CT	CT	TT	CC	CC	TT	CT	CC	CT	CC	CC	TT	CT	CT	CT	CT	CT	TT	CT	CT	TT	TT	CT	TT	TT
contig30570_124	T	A	AT	TT	TT	TT	TT	AT	AT	TT	AT	AT	AT	AT	TT	AT	AT	TT	TT	TT	AT	AT	TT	AT	AT	AT	AT	TT	TT	AT	AT	TT	TT	TT	TT	AT	TT	AT	TT	AT	AT	AT	AT	AT	TT	TT	TT	TT	AT
contig30570_8	T	C	TT	CC	CC	CC	CC	CT	CT	CT	CT	TT	CT	CT	CC	TT	CT	CC	CT	CC	CT	TT	CC	CT	TT	CT	TT	CT	CC	TT	CT	CC	CT	CC	CT	TT	CT	CT	CT	CT	CT	TT	CT	CT	TT	TT	CT	TT	TT
contig624313_118	T	C	CT	TT	TT	TT	TT	CT	CT	TT	CT	CT	CT	CT	TT	CT	CT	TT	TT	TT	CT	CT	TT	CT	CT	CT	TT	TT	TT	CT	CT	TT	TT	TT	TT	TT	TT	CT	TT	CT	CT	CT	CT	CT	CT	CT	TT	CT	CT
contig30570_119	C	A	AC	CC	CC	CC	CC	AC	AC	CC	AC	AC	AC	AC	CC	AC	AC	CC	CC	CC	AC	AC	CC	AC	AC	AC	AC	CC	CC	AC	AC	CC	CC	CC	CC	AC	CC	AC	CC	AC	AC	AC	AC	AC	AC	AC	CC	AC	AC
contig47208_105	A	C	CA	AA	AA	AA	AA	CA	CA	AA	CA	CA	CA	CA	AA	CA	CA	AA	AA	AA	CA	CA	AA	CA	CA	CA	CA	AA	AA	CA	CA	AA	AA	AA	AA	CA	AA	CA	AA	CA	CA	CA	CA	CA	CA	CA	AA	CA	CA
contig47208_237	A	G	GA	AA	AA	AA	AA	GA	GA	AA	GA	GA	GA	GA	AA	GA	GA	AA	AA	AA	GA	GA	AA	GA	GA	GA	GA	AA	AA	GA	GA	AA	AA	AA	AA	GA	AA	GA	AA	GA	GA	GA	GA	GA	GA	GA	AA	GA	GA
contig30570_53	A	G	GA	AA	AA	AA	AA	GA	GA	AA	GA	GA	GA	GA	AA	GA	GA	AA	AA	AA	GA	GA	AA	GA	GA	GA	GA	AA	AA	GA	GA	AA	AA	AA	AA	GA	AA	GA	AA	GA	GA	GA	GA	GA	GA	GA	AA	GA	GA
contig16726_122	G	T	TG	GG	GG	GG	GG	TG	TG	GG	TG	TG	TG	TG	GG	TG	TG	GG	GG	GG	TG	GG	GG	TG	TG	TG	TG	GG	GG	TG	TG	GG	GG	GG	GG	TG	GG	TG	GG	TG	TG	TG	TG	TG	TG	TG	GG	TG	TG
contig30570_11	C	T	CC	TT	TT	TT	TT	TC	TC	TC	TC	CC	TC	TC	TT	CC	TC	TT	TC	TT	TC	CC	TT	TC	CC	TC	CC	TC	TT	CC	TC	TT	TC	TT	TC	CC	TC	TC	TC	TC	TC	CC	TC	TC	CC	CC	TC	CC	CC
contig625697_86	C	T	CC	TT	TT	TT	TT	TC	TC	CC	TC	CC	TC	TC	TT	CC	TC	TT	TC	TC	TC	CC	TT	TC	CC	TC	CC	TC	TT	CC	TC	TT	TC	TT	TC	CC	TC	TC	TC	TC	TC	CC	TC	TT	CC	CC	TC	CC	CC
contig57968_152	A	G	AA	GG	GG	GG	GG	GA	GA	AA	GA	AA	GA	GA	GG	AA	GA	GG	GA	GA	GA	AA	GG	GA	AA	GA	AA	GA	GG	AA	GA	GG	GA	GG	GA	AA	GA	GA	GA	GA	GA	AA	GA	GA	AA	AA	GA	AA	AA
contig49696_121	A	T	TA	AA	AA	AA	AA	AA	AA	TA	AA	TA	AA	AA	AA	TA	AA	AA	TA	TA	AA	TA	AA	AA	TA	AA	TA	TA	AA	TA	AA	AA	TA	AA	TA	TA	TA	AA	TA	AA	AA	TA	AA	AA	AA	AA	TA	AA	TA
contig625697_61	T	A	TT	AA	AA	AA	AA	AT	AT	TT	AT	TT	AT	AT	AA	TT	AT	AA	AT	AT	AT	TT	AA	AT	TT	AT	TT	AT	AA	TT	AT	AA	AT	AA	AT	TT	AT	AT	AT	AT	AT	TT	AT	AA	AT	AT	AT	AT	TT
contig625697_85	A	T	AA	TT	TT	TT	TT	TA	TA	AA	TA	AA	TA	TA	TT	AA	TA	TT	TA	TA	TA	AA	TT	TA	AA	TA	AA	TA	TT	AA	TA	TT	TA	TT	TA	AA	TA	TA	TA	TA	TA	AA	TA	TT	TA	TA	TA	TA	AA
contig623889_71	C	A	CC	CC	CC	CC	CC	AC	AC	AC	AC	AC	AC	AC	CC	AC	AC	CC	CC	CC	AC	AC	CC	AC	AC	AC	AC	CC	CC	AC	AC	CC	CC	CC	CC	AC	CC	AC	CC	AC	AC	AC	AC	AC	AC	AC	CC	AC	AC
contig625697_62	T	G	GT	TT	TT	TT	TT	GT	GT	GT	GT	GT	GT	GT	TT	GT	GT	TT	TT	TT	GT	GT	TT	GT	GT	GT	GT	TT	TT	GT	GT	TT	TT	TT	TT	GT	TT	GT	TT	GT	GT	GT	GT	TT	GG	GG	TT	GG	GT
contig57968_159	G	A	AG	GG	GG	GG	GG	GG	GG	AG	GG	AG	GG	GG	GG	AG	GG	GG	AG	AG	GG	AG	GG	GG	AG	GG	AG	AG	GG	AG	GG	GG	AG	GG	AG	AG	AG	GG	AG	GG	GG	AG	GG	GG	GG	GG	AG	GG	AG
contig889690_203	T	C	CC	TT	TT	TT	TT	CT	CT	CC	CT	CC	CT	CT	TT	CC	CT	TT	TT	TT	CT	CC	TT	CT	CC	CT	CC	TT	TT	CC	CT	TT	TT	TT	TT	CC	TT	CT	TT	CT	CT	CC	CT	CT	CT	CT	TT	CT	CC
contig889690_202	C	A	AA	CC	CC	CC	CC	AC	AC	AA	AC	AA	AC	AC	CC	AA	AC	CC	CC	CC	AC	AA	CC	AC	AA	AC	AA	CC	CC	AA	AC	CC	CC	CC	CC	AA	CC	AC	CC	AC	AC	AA	AC	AC	AC	AC	CC	AC	AA
contig623889_31	G	A	GG	GG	GG	GG	GG	AG	AG	AG	AG	AG	AG	AG	GG	AG	AG	GG	GG	GG	AG	AG	GG	AG	AG	AG	AG	GG	GG	AG	AG	GG	GG	GG	GG	AG	GG	AG	GG	AG	AG	AG	AG	AG	AG	AG	GG	AG	AG
contig57968_161	A	T	TA	AA	AA	AA	AA	TA	TA	TA	TA	TA	TA	TA	AA	TA	TA	AA	AA	AA	TA	TA	AA	TA	TA	TA	TA	AA	AA	TA	TA	AA	AA	AA	AA	TA	AA	TA	AA	TA	TA	TA	TA	TA	TA	TA	AA	TA	TA
contig623889_92	G	A	GG	GG	GG	GG	GG	AG	AG	AG	AG	AG	AG	AG	GG	AG	AG	GG	GG	GG	AG	AG	GG	AG	AG	AG	AG	GG	GG	AG	AG	GG	GG	GG	GG	AG	GG	AG	GG	AG	AG	AG	AG	AG	AG	AG	GG	AG	AG
contig699342_36	T	G	GG	TT	TT	TT	TT	GT	GT	GG	GT	GG	GT	GT	TT	GG	GT	TT	TT	TT	GT	GG	TT	GT	GG	GT	GG	TT	TT	GG	GT	TT	TT	TT	TT	GG	TT	GT	TT	GT	GT	GG	GT	GT	GT	GT	TT	GT	GG
contig18437_129	C	A	AC	CC	CC	CC	AC	CC	CC	AC	CC	AC	CC	CC	CC	AC	CC	CC	AC	AC	CC	AC	CC	CC	AC	CC	AC	AC	CC	AC	CC	CC	AC	CC	AC	AC	AC	CC	AC	CC	CC	AC	CC	CC	CC	CC	AC	CC	AC
contig18437_87	G	A	AG	GG	GG	GG	AG	GG	GG	AG	GG	AG	GG	GG	GG	AG	GG	GG	AG	AG	GG	AG	GG	GG	AG	GG	AG	AG	GG	AG	GG	GG	AG	GG	AG	AG	AG	GG	AG	GG	GG	AG	GG	GG	AG	GG	AG	GG	AG
contig49696_108	C	T	TC	CC	CC	CC	CC	TC	TC	TC	TC	TC	TC	TC	CC	TC	TC	CC	CC	CC	TC	TC	CC	TC	TC	TC	TC	CC	CC	TC	TC	CC	CC	CC	CC	CC	CC	TC	CC	TC	TC	TC	TC	TC	TC	TC	CC	TC	TC
contig18437_109	A	C	CA	AA	AA	AA	CA	AA	AA	CA	AA	CA	AA	AA	AA	CA	AA	AA	CA	CA	AA	CA	AA	AA	CA	AA	CA	CA	AA	CA	AA	AA	CA	AA	CA	CA	CA	AA	CA	AA	AA	CA	AA	AA	CA	AA	CA	AA	CA
contig18437_119	G	A	AG	GG	GG	GG	GG	AG	AG	AG	AG	AG	AG	AG	GG	AG	AG	GG	GG	GG	AG	AG	GG	AG	AG	AG	AG	GG	GG	AG	AG	GG	GG	GG	GG	GG	GG	AG	GG	AG	AG	AG	AG	AG	AG	AG	GG	AG	AG
contig716842_94	A	C	CC	AA	AA	AA	AA	CA	CA	CC	CA	CC	CA	CA	AA	CC	CA	AA	AA	AA	CA	CC	AA	CC	CC	CA	CC	AA	AA	CC	CA	AA	AA	AA	AA	AA	AA	CA	AA	CA	CA	CC	CA	CA	CC	CA	AA	CA	CC
contig716842_23	A	G	GG	AA	AA	AA	AA	GA	GA	GG	GA	GG	GA	GA	AA	GG	GA	AA	AA	AA	GA	GG	AA	GG	GG	GA	GG	AA	AA	GG	GA	AA	AA	AA	AA	AA	AA	GA	AA	GA	GA	GG	GA	GA	GG	GA	AA	GA	GG
contig716842_63	A	G	GG	AA	AA	AA	AA	GA	GA	GG	GA	GG	GA	GA	AA	GG	GA	AA	AA	AA	GA	GG	AA	GG	GG	GA	GG	AA	AA	GG	GA	AA	AA	AA	AA	AA	AA	GA	AA	GA	GA	GG	GA	GA	GG	GA	AA	GA	GG
contig278927_39	G	T	TG	GG	GG	GG	GG	TG	TG	TG	TG	GG	TG	TG	GG	TG	TG	GG	GG	GG	TG	TG	GG	TG	TG	TG	TG	GG	GG	TG	TG	GG	GG	GG	GG	GG	GG	TG	GG	TG	TG	TG	TG	TG	GG	GG	GG	GG	TG
contig11078_222	G	A	GG	AA	AA	AA	AA	AG	AG	GG	AG	GG	AG	AG	AA	GG	AG	AA	AG	AG	AG	GG	AA	AG	GG	AG	GG	AG	AA	GG	AG	AA	AG	AG	AG	AG	AG	AG	AG	AG	AG	GG	AG	AG	GG	AG	AG	AG	GG
contig11078_180	G	T	GG	TT	TT	TT	TT	TG	TG	GG	TG	GG	TG	TG	TT	GG	TG	TT	TG	TG	TG	GG	TT	TG	GG	TG	GG	TG	TT	GG	TG	TT	TG	TG	TG	TG	TG	TG	TG	TG	TG	GG	TG	TG	GG	TG	TG	TG	GG
contig521309_107	C	G	GC	CC	CC	CC	CC	GC	GC	GC	GC	GC	GC	GC	CC	GC	GC	CC	CC	CC	GC	GC	CC	GC	GC	GC	GC	CC	CC	GC	GC	CC	CC	CC	CC	CC	CC	GC	CC	GC	GC	GC	GC	GC	CC	GC	CC	GC	GC
contig11826_113	A	G	AA	GG	GG	GG	GG	GA	GA	AA	GA	AA	GA	GA	GG	AA	GA	GG	GA	GA	GA	AA	GG	GA	AA	GA	AA	GA	GG	AA	GA	GG	GA	GA	GA	GA	GA	GA	GA	GA	GA	AA	GA	GA	AA	GA	GA	GA	AA
contig521309_157	G	A	GG	AA	AA	AA	AA	AG	AG	GG	AG	GG	AG	AG	AA	GG	AG	AA	AG	AG	AG	GG	AA	AG	GG	AG	GG	AG	AA	GG	AG	AA	AG	AG	AG	AG	AG	AG	AG	AG	AG	GG	AG	AG	AG	AG	AG	AG	GG
contig708267_73	C	T	CC	TT	TT	TT	TT	TC	TC	CC	TC	CC	TC	TC	TT	CC	TC	TT	TC	TC	TC	CC	TT	TC	CC	TC	CC	TC	TT	CC	TC	TT	TC	TC	TC	TC	TC	TC	TC	TC	TC	CC	TC	TC	TC	CC	TC	TC	CC
contig11826_162	T	G	GT	TT	TT	TT	TT	TT	TT	GT	TT	GT	TT	TT	TT	GT	TT	TT	GT	GT	TT	GT	TT	TT	GT	TT	GT	GT	TT	GT	TT	TT	GT	GT	GT	GT	GT	TT	GT	TT	TT	GT	TT	TT	GT	GT	GT	GT	GT
contig69671_65	G	A	AG	GG	GG	GG	GG	GG	GG	AG	GG	AG	GG	GG	GG	AG	GG	GG	AG	AG	GG	AG	GG	GG	AG	GG	AG	AG	GG	AG	GG	GG	AG	AG	AG	AG	AG	GG	AG	GG	GG	AG	GG	GG	AG	AG	AG	AG	AG
contig11826_218	A	T	TA	AA	AA	AA	AA	AA	AA	TA	AA	TA	AA	AA	AA	TA	AA	AA	TA	TA	AA	TA	AA	AA	TA	AA	TA	TA	AA	TA	AA	AA	TA	TA	TA	TA	TA	AA	TA	AA	AA	TA	AA	AA	TA	TA	TA	TA	TA
contig278927_6	A	G	AA	GG	GG	GG	GG	GA	GA	AA	GA	AA	GA	GA	GG	AA	GA	GG	GA	GA	GA	AA	GG	GA	AA	GA	AA	GA	GG	AA	GA	GG	GA	GA	GA	AA	GA	GA	GA	GA	GA	AA	GG	GA	GA	GA	GA	GA	AA
contig372676_56	G	A	AG	GG	GG	GG	GG	GG	GG	AG	GG	AG	GG	GG	GG	AG	GG	GG	AG	AG	GG	AG	GG	GG	AG	GG	AG	AG	GG	AG	GG	GG	AG	AG	AG	AG	AG	GG	AG	GG	GG	AG	GG	GG	AG	AG	AG	AG	AG
contig487800_47	A	G	GG	AA	AA	AA	AA	AA	AA	GG	AA	GA	AA	AA	AA	GA	AA	AA	GA	GA	AA	GA	AA	AA	GA	AA	GA	GA	AA	GA	AA	AA	GA	GA	GA	GG	GA	AA	GA	AA	AA	GA	AA	AA	GA	GA	GA	GA	GA
contig708267_31	C	T	TC	CC	CC	CC	CC	CC	CC	TC	CC	TC	CC	CC	CC	TC	CC	CC	TC	TC	CC	TC	CC	CC	TC	CC	TC	TC	CC	TC	CC	CC	TC	TC	TC	TC	TC	CC	TC	CC	CC	TC	CC	CC	TC	TC	TC	TC	TC
contig69671_251	C	A	AC	CC	CC	CC	CC	CC	CC	AC	CC	AC	CC	CC	CC	AC	CC	CC	AC	AC	CC	AC	CC	CC	AC	CC	AC	AC	CC	AC	CC	CC	AC	AC	AC	AC	AC	CC	AC	CC	CC	AC	CC	CC	AC	AC	AC	AC	AC
contig11826_263	T	C	CT	TT	TT	TT	TT	TT	TT	CT	TT	CT	TT	TT	TT	CT	TT	TT	CT	CT	TT	CT	TT	TT	CT	TT	CT	CT	TT	CT	TT	TT	CT	CT	CT	CT	CT	TT	CT	TT	TT	CT	TT	TT	CT	CT	CT	CT	CT
contig372676_98	T	A	AT	TT	TT	TT	TT	TT	TT	AT	TT	AT	TT	TT	TT	AT	TT	TT	AT	AT	TT	AT	TT	TT	AT	TT	AT	AT	TT	AT	TT	TT	AT	AT	AT	AT	AT	TT	AT	TT	TT	AT	TT	TT	AT	AT	AT	AT	AT
contig45787_65	G	A	AG	GG	GG	GG	GG	GG	GG	AG	GG	AG	GG	GG	GG	AG	GG	GG	AG	AG	GG	AG	GG	GG	AG	GG	AG	AG	GG	AG	GG	GG	AG	AG	AG	AG	AG	GG	AG	GG	GG	AG	GG	GG	AG	AG	AG	AG	AG
contig487800_81	T	A	AA	TT	TT	TT	TT	TT	TT	AA	TT	AT	TT	TT	TT	AT	TT	TT	AT	AT	TT	AT	TT	TT	AT	TT	AT	AT	TT	AT	TT	TT	AT	AT	AT	AT	AT	TT	AT	TT	TT	AT	TT	TT	AA	AA	AT	AA	AT
contig785723_33	G	T	TG	GG	GG	GG	GG	GG	GG	TG	GG	TG	GG	GG	GG	TG	GG	GG	TG	TG	GG	TG	GG	GG	TG	GG	TG	TG	GG	TG	GG	GG	TG	TG	GG	TG	TG	GG	TG	GG	GG	TG	GG	GG	TT	TT	TG	TT	TG
contig785723_50	C	T	CC	TT	TT	TT	TT	TC	TC	CC	TC	CC	TC	TC	TT	CC	TC	TT	TC	TC	TC	CC	TT	TC	CC	TC	CC	TC	TT	CC	TC	TT	TC	TC	TT	TC	TC	CC	TC	TC	TC	CC	CC	TC	CC	CC	TC	CC	CC
contig11826_92	G	A	AG	GG	GG	GG	GG	GG	GG	AG	GG	AG	GG	GG	GG	AG	GG	GG	AG	AG	GG	AG	GG	GG	AG	GG	AG	AG	GG	AG	GG	GG	AG	AG	AG	AG	AG	GG	AG	GG	GG	AG	GG	GG	AG	AG	AG	AG	AG
contig393806_87	A	C	CA	AA	AA	AA	AA	AA	AA	CA	AA	CA	AA	AA	AA	CA	AA	AA	CA	CA	AA	CA	AA	AA	CA	AA	CA	CA	AA	CA	AA	AA	CA	CA	CA	CA	CA	AA	CA	AA	AA	CA	AA	AA	CA	CA	CA	CA	CA
contig785723_37	A	T	AA	TT	TT	TT	TT	TA	TA	AA	TA	AA	TA	TA	TT	AA	TA	TT	TA	TA	TA	AA	TT	TA	AA	TA	AA	TA	TT	AA	TA	TT	TA	TA	TT	TA	TA	AA	TA	TA	TA	AA	AA	TA	AA	AA	TA	AA	AA
contig606865_8	G	C	CC	GG	GG	GG	GG	GG	GG	CC	GG	CG	GG	GG	GG	CG	GG	GG	CG	CG	GG	GG	GG	GG	CG	GG	CG	CG	GG	CG	GG	GG	CG	CG	CG	CG	CG	GG	CG	GG	GG	CG	GG	GG	CG	CG	CG	CG	CG
contig372676_95	C	T	TC	CC	CC	CC	CC	CC	CC	TC	CC	TC	CC	CC	CC	TC	CC	CC	TC	TC	CC	TC	CC	CC	TC	CC	TC	TC	CC	TC	CC	CC	TC	TC	TC	TC	TC	CC	TC	CC	CC	TC	CC	CC	TC	TC	TC	TC	TC
contig785723_39	A	C	AA	CC	CC	CC	CC	CA	CA	AA	CA	AA	CA	CA	CC	AA	CA	CC	CA	CA	CA	AA	CC	CA	AA	CA	AA	CA	CC	AA	CA	CC	CA	CA	CC	CA	CA	AA	CA	CA	CA	AA	AA	CA	AA	AA	CA	AA	AA
contig45787_17	T	C	CT	TT	TT	TT	TT	CT	CT	CT	CT	CT	CT	CT	TT	CT	CT	TT	TT	TT	CT	CT	TT	CT	CT	CT	CT	TT	TT	CT	CT	TT	TT	TT	TT	TT	TT	CT	TT	CT	CT	CT	CT	CT	CT	CT	TT	CT	CT
contig45787_142	A	C	CA	AA	AA	AA	AA	CA	CA	CA	CA	CA	CA	CA	AA	CA	CA	AA	AA	AA	CA	CA	AA	CA	CA	CA	CA	AA	AA	CA	CA	AA	AA	AA	AA	AA	AA	CA	AA	CA	CA	CA	CA	CA	CA	CA	AA	CA	CA
contig572755_31	G	A	AG	GG	GG	GG	GG	AG	AG	AG	AG	AG	AG	AG	GG	AG	AG	GG	GG	GG	AG	AG	GG	AG	AG	AG	AG	GG	GG	AG	AG	GG	GG	GG	GG	GG	GG	AG	GG	AG	AG	AG	AG	AG	AG	AG	GG	AG	AG
contig45787_137	C	T	TC	CC	CC	CC	CC	TC	TC	TC	TC	TC	TC	TC	CC	TC	TC	CC	CC	CC	TC	TC	CC	TC	TC	TC	TC	CC	CC	TC	TC	CC	CC	CC	CC	CC	CC	TC	CC	TC	TC	TC	TC	TC	TC	TC	CC	TC	TC
contig45787_61	T	A	AT	TT	TT	TT	TT	AT	AT	AT	AT	AT	AT	AT	TT	AT	AT	TT	TT	TT	AT	AT	TT	AT	AT	AT	AT	TT	TT	AT	AT	TT	TT	TT	TT	TT	TT	AT	TT	AT	AT	AT	AT	AT	AT	AT	TT	AT	AT
contig45787_187	A	G	GA	AA	AA	AA	AA	GA	GA	GA	GA	GA	GA	GA	AA	GA	GA	AA	AA	AA	GA	GA	AA	GA	GA	GA	GA	AA	AA	GA	GA	AA	AA	AA	AA	AA	AA	GA	AA	GA	GA	GA	GA	GA	GA	GA	AA	GA	GA
contig372676_131	C	G	CC	GG	GG	GG	GG	GC	GC	CC	GC	CC	GC	GC	GG	CC	GC	GG	GC	GC	GC	CC	GG	GC	CC	GC	CC	GC	GG	CC	GC	GG	GC	GC	GC	GC	GC	GC	GC	GC	GC	CC	GC	GC	CC	CC	GG	CC	CC
contig45787_210	G	C	CG	GG	GG	GG	GG	CG	CG	CG	CG	CG	CG	CG	GG	CG	CG	GG	GG	GG	CG	CG	GG	CG	CG	CG	CG	GG	GG	CG	CG	GG	GG	GG	GG	GG	GG	CG	GG	CG	CG	CG	CG	CG	CG	CG	GG	CG	CG
contig45787_35	C	T	TC	CC	CC	CC	CC	TC	TC	TC	TC	TC	TC	TC	CC	TC	TC	CC	CC	CC	TC	TC	CC	TC	TC	TC	TC	CC	CC	TC	TC	CC	CC	CC	CC	CC	CC	TC	CC	TC	TC	TC	TC	TC	CC	CC	CC	CC	TC
contig487800_82	T	A	AT	TT	TT	TT	TT	AT	AT	AT	AT	AT	AT	AT	TT	AT	AT	TT	TT	TT	AT	AT	TT	AT	AT	AT	AT	TT	TT	AT	AT	TT	TT	TT	TT	TT	TT	AT	TT	AT	AT	AT	AT	AT	TT	TT	TT	TT	AT
contig45787_156	T	C	CT	TT	TT	TT	TT	CT	CT	CT	CT	CT	CT	CT	TT	CT	CT	TT	TT	TT	CT	CT	TT	CT	CT	CT	CT	TT	TT	CT	CT	TT	TT	TT	TT	TT	TT	CT	TT	CT	CT	CT	CT	CT	TT	TT	TT	TT	CT
contig487800_110	A	G	GA	AA	AA	AA	AA	GA	GA	GA	GA	GA	GA	GA	AA	GA	GA	AA	AA	AA	GA	GA	AA	GA	GA	GA	GA	AA	AA	GA	GA	AA	AA	AA	AA	AA	AA	GA	AA	GA	GA	GA	GA	GA	GA	GA	AA	GA	GA
contig487800_54	G	A	AG	GG	GG	GG	GG	AG	AG	AG	AG	AG	AG	AG	GG	AG	AG	GG	GG	GG	AG	AG	GG	AG	AG	AG	AG	GG	GG	AG	AG	GG	GG	GG	GG	GG	GG	AG	GG	AG	AG	AG	AG	AG	AG	AG	GG	AG	AG
contig774368_184	G	A	GG	AA	AA	AA	AA	AG	AG	GG	AG	GG	GG	AG	AA	GG	AG	AA	AG	AG	AG	GG	AA	GG	GG	AG	GG	AG	AA	GG	AG	AA	AG	AG	AG	AA	AG	AG	AG	AG	AG	GG	AG	AG	GG	GG	AG	GG	GG
contig774368_114	T	C	TT	CC	CC	CC	CC	CT	CT	TT	CT	TT	TT	CT	CC	TT	CT	CC	CT	CT	CT	TT	CC	TT	TT	CT	TT	CT	CC	TT	CT	CC	CT	CT	CT	CC	CT	CT	CT	CT	CT	TT	CT	CT	TT	TT	CT	TT	TT
contig774368_78	A	G	GA	AA	AA	AA	AA	GA	GA	GA	GA	GA	GA	GA	AA	GA	GA	AA	AA	AA	GA	GA	AA	GA	GA	GA	GA	AA	AA	GA	GA	AA	AA	AA	AA	AA	AA	GA	AA	GA	GA	GA	GA	GA	GA	GA	AA	GA	GA
contig44815_139	C	G	GC	CC	CC	CC	CC	GC	GC	GC	GC	GC	GC	GC	CC	GC	GC	CC	CC	CC	GC	GC	GC	GC	GC	GC	GC	CC	CC	GC	GC	CC	CC	CC	CC	CC	CC	GC	CC	GC	GC	GC	GC	GC	GC	GC	GC	GC	GC
contig22873_176	C	T	TC	CC	CC	CC	CC	TC	TC	TC	TC	TC	TC	TC	CC	TC	TC	CC	CC	CC	TC	TC	TC	TC	TC	TC	TC	CC	CC	TC	TC	CC	CC	CC	CC	CC	CC	TC	CC	TC	TC	TC	TC	TC	TC	TC	CC	TC	TC
contig55156_154	C	T	CC	TT	TT	TT	TT	TC	TC	CC	TC	CC	TC	TC	TT	CC	TC	TT	TC	TC	TC	CC	TC	TC	CC	TC	CC	TC	TT	CC	TC	TT	TC	TC	TC	TC	TC	TC	TC	CC	TC	CC	TC	TC	CC	CC	TC	CC	CC
contig55078_51	T	A	AT	TT	TT	TT	TT	AT	AT	AT	AT	AT	AT	AT	TT	AT	AT	TT	TT	TT	AT	AT	AT	AT	AT	AT	AT	TT	TT	AT	AT	TT	TT	TT	TT	TT	TT	AT	TT	AT	AT	AT	AT	AT	AT	AT	AA	AT	AT
contig495158_30	G	A	AG	GG	GG	GG	GG	AG	AG	AG	AG	AG	AG	AG	GG	AG	AG	GG	GG	GG	AG	AG	AG	AG	AG	AG	AG	GG	GG	AG	AG	GG	GG	GG	GG	GG	GG	AG	GG	AG	AG	AG	AG	AG	AG	AG	AG	AG	AG
contig55156_136	A	C	CA	AA	AA	AA	AA	CA	CA	CA	CA	CA	CA	CA	AA	CA	CA	AA	AA	AA	CA	CA	CA	CA	CA	CA	CA	AA	AA	CA	CA	AA	AA	AA	AA	AA	AA	CA	AA	CA	CA	CA	CA	CA	CA	CA	CA	CA	CA
contig22873_41	G	A	AG	GG	GG	GG	GG	AG	AG	AG	AG	AG	AG	AG	GG	AG	AG	GG	GG	GG	AG	AG	AG	AG	AG	AG	AG	GG	GG	AG	AG	GG	GG	GG	GG	GG	GG	AG	GG	AG	AG	AG	AG	AG	AG	AG	GG	GG	AG
contig46536_53	T	G	GT	TT	TT	TT	TT	GT	GT	GT	GT	GT	GT	GT	TT	GT	GT	TT	TT	TT	GT	GT	GT	GT	GT	GT	GT	TT	TT	GT	GT	TT	TT	TT	TT	TT	TT	GT	TT	GT	GT	GT	GT	GT	GT	GT	TT	TT	GT
contig42624_50	G	A	AG	GG	GG	GG	GG	AG	AG	AG	AG	AG	AG	AG	GG	AG	AG	GG	GG	GG	AG	AG	AG	AG	AG	AG	AG	GG	GG	AG	AG	GG	GG	GG	GG	GG	GG	AG	GG	AG	AG	AG	AG	AG	AG	AG	GG	GG	AG
contig51411_180	C	T	CC	TT	TT	TT	TT	TC	TC	CC	TC	CC	TC	TC	TT	CC	TC	TT	TC	TC	TC	CC	TC	TC	CC	TC	CC	TC	TT	CC	TC	TT	TC	TC	TC	TC	TC	TC	TC	TC	TC	CC	TC	TC	TC	CC	CC	CC	CC
contig51411_238	G	A	GG	AA	AA	AA	AA	AG	AG	GG	AG	GG	AG	AG	AA	GG	AG	AA	AG	AG	AG	GG	AG	AG	GG	AG	GG	AG	AA	GG	AG	AA	AG	AG	AG	AG	AG	AG	AG	AG	AG	GG	AG	AG	AG	GG	GG	GG	GG
contig46536_26	C	A	AA	CC	CC	CC	CC	AC	AC	AA	AC	AA	AC	AC	CC	AA	AC	CC	AC	AC	AC	AA	AC	AC	AA	AC	AA	AC	CC	AA	AC	CC	AC	AC	AC	AC	AC	AC	AC	AC	AC	AA	AC	AC	AC	AA	CC	CC	AA
contig22873_66	T	C	TT	CC	CC	CC	CC	CT	CT	TT	CT	TT	CT	CT	CC	TT	CT	CC	CT	CT	CT	TT	CT	CT	TT	CT	TT	CT	CC	TT	CT	CC	CT	CT	CT	CT	CT	CT	CT	CT	CT	TT	CT	CT	CT	CT	TT	TT	TT
contig55078_183	A	T	AA	TT	TT	TT	TT	TA	TA	AA	TA	AA	TA	TA	TT	AA	TA	TT	TA	TA	TA	AA	TA	TA	AA	TA	AA	TA	TT	AA	TA	TT	TA	TA	TA	TA	TA	TA	TA	TA	TA	AA	TA	TA	TA	AA	AA	AA	AA
contig581556_65	A	T	AA	TT	TT	TT	TT	TA	TA	AA	TA	AA	TA	TA	TT	AA	TA	TT	TA	TA	TA	AA	TA	TA	AA	TA	AA	TA	TT	AA	TA	TT	TA	TA	TA	TA	TA	TA	TA	TA	TA	AA	TA	TA	TA	AA	TA	TA	AA
contig42624_28	T	C	TT	CC	CC	CC	CC	CT	CT	TT	CT	TT	CT	CT	CC	TT	CT	CC	CT	CT	CT	TT	CT	CT	TT	CT	TT	CT	CC	TT	CT	CC	CT	CT	CT	CT	CT	CT	CT	CT	CT	TT	CT	CT	CT	CT	CT	CT	TT
contig55078_62	G	T	GG	TT	TT	TT	TT	TG	TG	GG	TG	GG	TG	TG	TT	GG	TG	TT	TG	TG	TG	GG	TG	TG	GG	TG	GG	TG	TT	GG	TG	TT	TG	TG	TG	TG	TG	TG	TG	TG	TG	GG	TG	TG	TG	GG	TG	TG	GG
contig55156_149	C	A	CC	AA	AA	AA	AA	AC	AC	CC	AC	CC	AC	AC	AA	CC	AC	AA	AC	AC	AC	CC	AC	AC	CC	AC	CC	AC	AA	CC	AC	AA	AC	AC	AC	AC	AC	AC	AC	AC	AC	CC	AC	AC	AC	AC	AC	AC	CC
contig55078_63	A	G	AA	GG	GG	GG	GG	GA	GA	AA	GA	AA	GA	GA	GG	AA	GA	GG	GA	GA	GA	AA	GA	GA	AA	GA	AA	GA	GG	AA	GA	GG	GA	GA	GA	GA	GA	GA	GA	GA	GA	AA	GA	GA	GA	AA	GA	GA	AA
contig24900_39	T	G	TT	GG	GG	GG	GG	GT	GT	TT	GT	TT	GT	GT	GG	TT	GT	GG	GT	GT	GT	TT	GT	GT	TT	GT	TT	GT	GG	TT	GT	GG	GT	GT	GT	GT	GT	GT	GT	GT	GT	TT	GT	GT	GT	GT	GT	GT	TT
contig41783_6	T	C	TT	CC	CC	CC	CC	CT	CT	TT	CT	TT	CT	CT	CC	TT	CT	CC	CT	CT	CT	TT	CT	CT	TT	CT	TT	CT	CC	TT	CT	CC	CT	CT	CT	CT	CT	CT	CT	CT	CT	TT	CT	CT	CT	CT	CT	CT	TT
contig35175_94	G	A	GG	AA	AA	AA	AA	AG	AG	GG	AG	GG	AG	AG	AA	GG	AG	AA	AG	AG	AG	GG	AG	AG	GG	AG	GG	AG	AA	GG	AG	AA	AG	AG	AG	AG	AG	AG	AG	AG	AG	GG	AG	AG	AG	AG	AG	AG	GG
contig41783_268	C	T	CC	TT	TT	TT	TT	TC	TC	CC	TC	CC	TC	TC	TT	CC	TC	TT	TC	TC	TC	CC	TC	TC	CC	TC	CC	TC	TT	CC	TC	TT	TC	TC	TC	TC	TC	TC	TC	TC	TC	CC	TC	TC	TC	TC	TC	TC	CC
contig46536_74	T	G	TT	GG	GG	GG	GG	GT	GT	TT	GT	TT	GT	GT	GG	TT	GT	GG	GT	GT	GT	TT	GT	GT	TT	GT	TT	GT	GG	TT	GT	GG	GT	GT	GT	GT	GT	GT	GT	GT	GT	TT	GT	GT	GT	GT	GT	GT	TT
contig51411_171	A	G	AA	GG	GG	GG	GG	GA	GA	AA	GA	AA	GA	GA	GG	AA	GA	GG	GA	GA	GA	AA	GA	GA	AA	GA	AA	GA	GG	AA	GA	GG	GA	GA	GA	GA	GA	GA	GA	GA	GA	AA	GA	GA	GA	GA	GA	GA	AA
contig55078_105	T	G	TT	GG	GG	GG	GG	GT	GT	TT	GT	TT	GT	GT	GG	TT	GT	GG	GT	GT	GT	TT	GT	GT	TT	GT	TT	GT	GG	TT	GT	GG	GT	GT	GT	GT	GT	GT	GT	GT	GT	TT	GT	GT	GT	TT	GT	GT	TT
contig58311_24	T	C	TT	CC	CC	CC	CC	CT	CT	TT	CT	TT	CT	CT	CC	TT	CT	CC	CT	CT	CT	TT	CT	CT	TT	CT	TT	CT	CC	TT	CT	CC	CT	CT	CT	CT	CT	CT	CT	CT	CT	TT	CT	CT	CT	CT	CT	CT	TT
contig51411_166	A	G	AA	GG	GG	GG	GG	GA	GA	AA	GA	AA	GA	GA	GG	AA	GA	GG	GA	GA	GA	AA	GA	GA	AA	GA	AA	GA	GG	AA	GA	GG	GA	GA	GA	GA	GA	GA	GA	GA	GA	AA	GA	GA	GA	GA	GA	GA	AA
contig627356_47	C	G	CC	GG	GG	GG	GG	GC	GC	CC	GC	CC	GC	GC	GG	CC	GC	GG	GC	GC	GC	CC	GC	GC	CC	GC	CC	GC	GG	CC	GC	GG	GC	GC	GC	GC	GC	GC	GC	GC	GC	CC	GC	GC	GC	GC	GC	GC	CC
contig7174_93	T	G	GT	TT	TT	TT	TT	GT	GT	GT	GT	GT	GT	GT	TT	GT	GT	TT	TT	TT	GT	GT	GT	GT	GT	GT	GT	TT	TT	GT	GT	TT	TT	TT	TT	TT	TT	GT	TT	GT	GT	GT	GT	GT	GT	GT	GT	GT	GT
contig1527_118	A	C	CA	AA	AA	AA	AA	CA	CA	CA	CA	CA	CA	CA	AA	CA	CA	AA	AA	AA	CA	CA	CA	CA	CA	CA	CA	AA	AA	CA	CA	AA	AA	AA	AA	AA	AA	CA	AA	CA	CA	CA	CA	CA	CA	CA	CA	CA	CA
contig729237_70	T	G	TT	GG	GG	GG	GG	GT	GT	TT	GT	TT	GT	GT	GG	TT	GT	GG	GT	GT	GT	TT	GT	GT	TT	GT	TT	GT	GG	TT	GT	GG	GT	GT	GT	GT	GT	GT	GT	GT	GT	TT	GT	GT	GT	GT	GT	GT	TT
contig699690_112	G	A	AG	GG	GG	GG	GG	AG	AG	AG	AG	AG	AG	AG	GG	AG	AG	GG	GG	GG	AG	AG	AG	AG	AG	AG	AG	GG	GG	AG	AG	GG	GG	GG	GG	GG	GG	AG	GG	AG	AG	AG	AG	AG	AG	AG	AG	AG	AG
contig1527_255	A	T	TT	AA	AA	AA	AA	TA	TA	TT	TA	TT	TA	TA	AA	TT	TA	AA	TA	TA	TA	TT	TA	TA	TT	TA	TT	TA	AA	TT	TA	AA	TA	TA	TA	TA	TA	TA	TA	TA	TA	TT	TA	TA	TA	TA	TA	TA	TT
contig7174_38	T	C	CT	TT	TT	TT	TT	CT	CT	CT	CT	CT	CT	CT	TT	CT	CT	TT	TT	TT	CT	CT	CT	CT	CT	CT	CT	TT	TT	CT	CT	TT	TT	TT	TT	TT	TT	CT	TT	CT	CT	CT	CT	CT	CT	CT	CT	CT	CT
contig42409_130	G	A	AA	GG	GG	GG	GG	AG	AG	AA	AG	AA	AG	AG	GG	AA	AA	GG	AG	AG	GG	AA	AG	AG	AA	AG	AA	AG	GG	AA	AG	GG	AG	GG	AG	AG	AG	AG	AG	AG	AG	AA	AG	AG	AG	AG	AG	AA	AA
contig42409_190	C	T	TC	CC	CC	CC	CC	TC	TC	TC	TC	TC	TC	TC	CC	TC	TT	CC	CC	CC	CC	TC	TC	TC	TC	TC	TC	CC	CC	TC	TC	CC	CC	CC	CC	CC	CC	TC	CC	TC	TC	TC	TC	TC	TT	TT	TT	TC	TC
contig1527_22	A	G	GA	AA	AA	AA	AA	GA	GA	GA	GA	GA	GA	GA	AA	GA	GA	AA	AA	AA	GA	GA	GA	GA	GA	GA	GA	AA	AA	GA	GA	AA	AA	AA	AA	AA	AA	GA	AA	GA	GA	GA	GA	GA	GA	GA	GA	GA	GA
contig726248_179	A	G	GG	AA	AA	AA	AA	GA	GA	GG	GA	GG	GA	GA	AA	GG	GA	AA	GA	GA	GA	GG	GA	GA	GG	GA	GG	GA	AA	GG	GA	AA	GA	GA	GA	GA	GA	GA	GA	GA	GA	GG	GA	GA	GA	GG	GA	GG	GG
contig7174_156	C	T	CC	TT	TT	TT	TT	TC	TC	CC	TC	CC	TC	TC	TT	CC	TC	TT	TC	TC	TC	CC	TC	TC	CC	TC	CC	TC	TT	CC	TC	TT	TC	TT	TC	TC	TC	TC	TC	TC	TC	CC	CC	TC	TC	CC	TC	CC	CC
contig42409_32	C	T	TT	CC	CC	CC	CC	TC	TC	TT	TC	TT	TC	TC	CC	TT	TT	CC	TC	TC	CC	TT	TC	TC	TT	TC	TT	TC	CC	TT	TC	CC	TC	TC	TC	TC	TC	TC	TC	TC	TC	TT	TC	TC	TC	TT	TC	TT	TT
contig46972_54	T	A	AT	TT	TT	TT	TT	TT	TT	AT	TT	AT	TT	TT	TT	AT	TT	TT	AT	AT	TT	AT	TT	TT	AT	TT	AT	AT	TT	AT	TT	TT	AT	AT	AT	AT	AT	TT	AT	TT	TT	AT	TT	TT	AT	AT	AT	AT	AT
contig54590_43	T	A	TT	AA	AA	AA	AA	AT	AT	TT	AT	TT	AT	AT	AA	TT	AT	AA	AT	AT	AA	TT	AT	AT	TT	AT	TT	AT	AA	TT	AT	AA	AT	AT	AT	AT	AT	AT	AT	AT	AT	TT	AT	AT	AT	AT	AT	AT	TT
contig42409_65	T	C	CC	TT	TT	TT	TT	CT	CT	CC	CT	CC	CT	CT	TT	CC	CC	TT	CT	CT	TT	CC	CT	CT	CC	CT	CC	CT	TT	CC	CT	TT	CT	CT	CT	CT	CT	CT	CT	CT	CT	CC	CT	CT	CC	CC	CC	CC	CC
contig42409_94	G	T	TT	GG	GG	GG	GG	TG	TG	TT	TG	TT	TG	TG	GG	TT	TT	GG	TG	TG	GG	TT	TG	TG	TT	TG	TT	TG	GG	TT	TG	GG	TG	TT	TG	TG	TG	TG	TG	TG	TG	TT	TG	TG	TT	TT	TT	TT	TT
contig42409_85	G	A	GG	AA	AA	AA	AA	AG	AG	GG	AG	GG	AG	AG	AA	GG	GG	AA	AG	AG	AA	GG	AG	AG	GG	AG	GG	AG	AA	GG	AG	AA	AG	GG	AG	AG	AG	AG	AG	AG	AG	GG	AG	AG	GG	GG	GG	GG	GG
contig26089_179	A	T	TA	AA	AA	AA	AA	AA	AA	TA	AA	TA	AA	AA	AA	TA	AA	AA	TA	TA	AA	TA	AA	AA	TA	AA	TA	TA	AA	TA	AA	AA	TA	TA	TA	TA	TA	AA	TA	AA	AA	TA	AA	AA	TA	TA	TA	TA	TA
contig726248_112	C	T	CC	TT	TT	TT	TT	TC	TC	CC	TC	CC	TC	TC	TT	CC	TC	TT	TC	TC	TC	CC	TC	TC	CC	TC	CC	TC	TT	CC	TC	TT	TC	TC	TC	TC	TC	TC	TC	TC	TC	CC	TC	TC	CC	CC	CC	CC	CC
contig55078_61	T	A	AT	TT	TT	TT	TT	TT	TT	AT	TT	AT	TT	TT	TT	AT	TT	TT	AT	AT	TT	AT	TT	TT	AT	TT	AT	AT	TT	AT	TT	TT	AT	AT	AT	AT	AT	TT	AT	TT	TT	AT	TT	TT	AT	AT	AT	AT	AT
contig726248_70	G	A	AG	GG	GG	GG	GG	GG	GG	AG	GG	AG	GG	GG	GG	AG	GG	GG	AG	AG	GG	AG	GG	GG	AG	GG	AG	AG	GG	AG	GG	GG	AG	AG	AG	AG	AG	GG	AG	GG	GG	AG	GG	GG	AG	AG	AG	AG	AG
contig55078_151	A	G	GA	AA	AA	AA	AA	AA	AA	GA	AA	GA	AA	AA	AA	GA	AA	AA	GA	GA	AA	GA	AA	AA	GA	AA	GA	GA	AA	GA	AA	AA	GA	GA	GA	GA	GA	AA	GA	AA	AA	GA	AA	AA	GA	GA	GA	GA	GA
contig18865_87	C	A	AC	CC	CC	CC	CC	CC	CC	AC	CC	AC	CC	CC	CC	AC	CC	CC	AC	AC	CC	AC	CC	CC	AC	CC	AC	AC	CC	AC	CC	CC	AC	AC	AC	AC	CC	CC	AC	CC	CC	AC	CC	CC	AC	AC	AC	AC	AC
contig55078_168	C	T	TC	CC	CC	CC	CC	CC	CC	TC	CC	TC	CC	CC	CC	TC	CC	CC	TC	TC	CC	TC	CC	CC	TC	CC	TC	TC	CC	TC	CC	CC	TC	TC	TC	TC	TC	CC	TC	CC	CC	TC	CC	CC	TC	TC	TC	TC	TC
contig814328_10	A	G	GA	AA	AA	AA	AA	AA	AA	GA	AA	GA	AA	AA	AA	GA	AA	AA	GA	GA	AA	GA	AA	AA	GA	AA	GA	GA	AA	GA	AA	AA	GA	GA	GA	GA	GA	AA	GA	AA	AA	GA	AA	AA	GA	GA	GA	GA	GA
contig602139_39	T	C	CT	TT	TT	TT	TT	TT	TT	CT	TT	CT	TT	TT	TT	CT	TT	TT	CT	CT	TT	CT	TT	TT	CT	TT	CT	CT	TT	CT	TT	TT	CT	CT	CT	CT	CT	TT	CT	TT	TT	CT	TT	TT	CT	CT	CT	CT	CT
contig26089_163	G	T	TG	GG	GG	GG	GG	GG	GG	TG	GG	TG	GG	GG	GG	TG	GG	GG	TG	TG	GG	TG	GG	GG	TG	GG	TG	TG	GG	TG	GG	GG	TG	TG	TG	TG	TG	GG	TG	GG	GG	TG	GG	GG	TG	TG	TG	TG	TG
contig7174_167	C	A	AC	CC	CC	CC	CC	CC	CC	AC	CC	AC	CC	CC	CC	AC	CC	CC	AC	AC	CC	AC	CC	CC	AC	CC	AC	AC	CC	AC	CC	CC	AC	CC	AC	AC	AC	CC	AC	CC	CC	AC	CC	CC	AC	AC	AC	AC	AC
contig42624_18	A	G	GA	AA	AA	AA	AA	AA	AA	GA	AA	GA	AA	AA	AA	GA	AA	AA	GA	GA	AA	GA	AA	AA	GA	AA	GA	GA	AA	GA	AA	AA	GA	GA	GA	GA	GA	AA	GA	AA	AA	GA	AA	AA	GA	GA	GA	GA	GA
contig30205_25	T	C	CT	TT	TT	TT	TT	TT	TT	CT	TT	CT	TT	TT	TT	CT	TT	TT	CT	CT	TT	CT	TT	TT	CT	TT	CT	CT	TT	CT	TT	TT	CT	CT	CT	CT	CT	TT	CT	TT	TT	CT	TT	TT	CT	CT	CT	TT	CT
contig7174_174	A	T	TA	AA	AA	AA	AA	AA	AA	TA	AA	TA	AA	AA	AA	TA	AA	AA	TA	TA	AA	TA	AA	AA	TA	AA	TA	TA	AA	TA	AA	AA	TA	AA	TA	TA	TA	AA	TA	AA	AA	TA	AA	AA	TA	TA	TA	TA	TA
contig55156_112	G	T	TG	GG	GG	GG	GG	GG	GG	TG	GG	TG	GG	GG	GG	TG	GG	GG	TG	TG	GG	TG	GG	GG	TG	GG	TG	TG	GG	TG	GG	GG	TG	TG	TG	TG	TG	GG	TG	GG	GG	TG	GG	GG	TG	TG	TG	TG	TG
contig783106_102	T	C	CT	TT	TT	TT	TT	TT	TT	CT	TT	CT	TT	TT	TT	CT	TT	TT	CT	CT	TT	CT	TT	TT	CT	TT	CT	CT	TT	CT	TT	TT	CT	CT	CT	CT	CT	TT	CT	TT	TT	CT	TT	TT	TT	CT	TT	TT	CT
contig581556_137	A	G	GA	AA	AA	AA	AA	AA	AA	GA	AA	GA	AA	AA	AA	GA	AA	AA	GA	GA	AA	GA	AA	AA	GA	AA	GA	GA	AA	GA	AA	AA	GA	GA	GA	GA	GA	AA	GA	AA	AA	GA	AA	AA	AA	GA	AA	AA	GA
contig16107_89	A	T	TA	AA	AA	AA	AA	AA	AA	TA	AA	TA	AA	AA	AA	TA	AA	AA	TA	TA	AA	TA	AA	AA	TA	AA	TA	TA	AA	TA	AA	AA	TA	TA	TA	TA	TA	AA	TA	AA	AA	TA	AA	AA	AA	TA	AA	AA	TA
contig42409_234	G	T	TG	GG	GG	GG	GG	GG	GG	TG	GG	TG	GG	GG	GG	TG	GG	GG	TG	TG	GG	TG	GG	GG	TG	GG	TG	TG	GG	TG	GG	GG	TG	TG	TG	TG	TG	GG	TG	GG	GG	TG	GG	GG	GG	TG	GG	TG	TG
contig55156_17	G	A	AG	GG	GG	GG	GG	GG	GG	AG	GG	AG	GG	GG	GG	AG	GG	GG	AG	AG	GG	AG	GG	GG	AG	GG	AG	AG	GG	AG	GG	GG	AG	AG	AG	AG	AG	GG	AG	GG	GG	AG	GG	GG	GG	AG	GG	AG	AG
contig1527_268	A	G	GA	AA	AA	AA	AA	AA	AA	GA	AA	GA	AA	AA	AA	GA	AA	AA	GA	GA	AA	GA	AA	AA	GA	AA	GA	GA	AA	GA	AA	AA	GA	GA	GA	GA	GA	AA	GA	AA	AA	GA	AA	AA	GA	GA	AA	GA	GA
contig46536_168	A	G	GA	AA	AA	AA	AA	AA	AA	GA	AA	GA	AA	AA	AA	GA	AA	AA	GA	GA	AA	GA	AA	AA	GA	AA	GA	GA	AA	GA	AA	AA	GA	GA	GA	GA	GA	AA	GA	AA	AA	GA	AA	AA	GA	GA	AA	GA	GA
contig495158_73	C	T	TC	CC	CC	CC	CC	CC	CC	TC	CC	TC	CC	CC	CC	TC	CC	CC	TC	TC	CC	TC	CC	CC	TC	CC	TC	TC	CC	TC	CC	CC	TC	TC	TC	TC	TC	CC	TC	CC	CC	TC	CC	CC	TC	TC	CC	TC	TC
contig581556_47	G	A	AG	GG	GG	GG	GG	GG	GG	AG	GG	AG	GG	GG	GG	AG	GG	GG	AG	AG	GG	AG	GG	GG	AG	GG	AG	AG	GG	AG	GG	GG	AG	AG	AG	AG	AG	GG	AG	GG	GG	AG	GG	GG	AG	AG	GG	AG	AG
contig55078_147	C	T	TC	CC	CC	CC	CC	CC	CC	TC	CC	TC	CC	CC	CC	TC	CC	CC	TC	TC	CC	TC	CC	CC	TC	CC	TC	TC	CC	TC	CC	CC	TC	TC	TC	TC	TC	CC	TC	CC	CC	TC	CC	CC	TC	CC	CC	TC	TC
contig51411_76	A	G	GA	AA	AA	AA	AA	AA	AA	GA	AA	GA	AA	AA	AA	GA	AA	AA	GA	GA	AA	GA	AA	AA	GA	AA	GA	GA	AA	GA	AA	AA	GA	GA	GA	GA	GA	AA	GA	AA	AA	GA	AA	AA	GA	AA	AA	GA	GA
contig5005_3	G	A	GG	AA	AA	AA	AA	AG	AG	GG	AG	GG	AG	AG	AA	GG	AG	AA	AG	GG	AG	GG	AG	AG	GG	AG	GG	AA	AA	GG	AG	AA	GG	GG	AA	AA	GG	AG	AG	AG	AG	GG	AG	AG	GG	AG	AG	GG	GG
contig783106_116	C	T	TC	CC	CC	CC	CC	TC	TC	CC	TC	TC	TC	TC	CC	TC	TC	CC	CC	CC	TC	TC	TC	TC	TC	TC	TC	CC	CC	TC	TC	CC	CC	CC	CC	CC	CC	TC	CC	TC	TC	TC	TC	TC	CC	CC	TC	TC	TC
contig42624_36	T	C	CT	TT	TT	TT	TT	TT	TT	CT	TT	CT	TT	TT	TT	CT	TT	TT	CT	CT	TT	CT	TT	TT	CT	TT	CT	CT	TT	CT	TT	TT	CT	CT	CT	CT	CT	TT	CT	TT	TT	CT	TT	TT	CT	TT	CT	CT	CT
contig22873_108	T	A	AT	TT	TT	TT	TT	TT	TT	AT	TT	AT	TT	TT	TT	AT	TT	TT	AT	AT	TT	AT	TT	TT	AT	TT	AT	AT	TT	AT	TT	TT	AT	AT	AT	AT	AT	TT	AT	TT	TT	AT	TT	TT	AT	TT	AT	AT	AT
contig55078_161	G	A	AG	GG	GG	GG	GG	GG	GG	AG	GG	AG	GG	GG	GG	AG	GG	GG	AG	AG	GG	AG	GG	GG	AG	GG	AG	AG	GG	AG	GG	GG	AG	AG	AG	AG	AG	GG	AG	GG	GG	AG	GG	GG	AG	AG	AG	AG	AG
contig46972_86	T	G	GT	TT	TT	TT	TT	TT	TT	GT	TT	GT	TT	TT	TT	GT	TT	TT	GT	GT	TT	GT	TT	TT	GT	TT	GT	GT	TT	GT	TT	TT	GT	GT	GT	GT	GT	TT	GT	TT	TT	GT	TT	TT	GT	GT	GT	GT	GT
contig783106_189	C	T	TC	CC	CC	CC	CC	TC	TC	TC	TC	TC	TC	TC	CC	TC	TC	CC	CC	CC	TC	TC	TC	TC	TC	TC	TC	CC	CC	TC	TC	CC	CC	CC	CC	CC	CC	TC	CC	TC	TC	TC	TC	TC	CC	CC	CC	CC	TC
contig55078_173	G	A	AG	GG	GG	GG	GG	GG	GG	AG	GG	AG	GG	GG	GG	AG	GG	GG	AG	AG	GG	AG	GG	GG	AG	GG	AG	AG	GG	AG	GG	GG	AG	AG	AG	AG	AG	GG	AG	GG	GG	AG	GG	GG	AG	AG	AG	AG	AG
contig18865_54	C	T	TC	CC	CC	CC	CC	CC	CC	TC	CC	TC	CC	CC	CC	TC	CC	CC	TC	TC	CC	TC	CC	CC	TC	CC	TC	TC	CC	TC	CC	CC	TC	TC	TC	TC	CC	CC	TC	CC	CC	TC	CC	CC	TC	TC	TC	TC	TC
contig602139_51	G	A	AG	GG	GG	GG	GG	AG	AG	AG	AG	AG	AG	AG	GG	AG	AG	GG	GG	GG	AG	AG	AG	AG	AG	AG	AG	GG	GG	AG	AG	GG	GG	GG	GG	GG	GG	AG	GG	AG	AG	AG	AG	AG	GG	GG	AG	AG	AG
contig672213_58	A	G	GA	AA	AA	AA	AA	AA	AA	GA	AA	GA	AA	AA	AA	GA	AA	AA	GA	GA	AA	GA	AA	AA	GA	AA	GA	GA	AA	GA	AA	AA	GA	GA	GA	GA	GA	AA	GA	AA	AA	GA	AA	AA	GA	GA	GA	GA	GA
contig4439_198	C	T	TC	CC	CC	CC	CC	CC	CC	TC	CC	TC	CC	CC	CC	TC	CC	CC	TC	TC	CC	TC	CC	CC	TC	CC	TC	TC	CC	TC	CC	CC	TC	TC	TC	TC	TC	CC	TC	CC	CC	TC	CC	CC	CC	TC	TC	TC	TC
contig602139_128	A	G	GA	AA	AA	AA	AA	GA	GA	GA	GA	GA	GA	GA	AA	GA	GA	AA	AA	AA	GA	GA	GA	GA	GA	GA	GA	AA	AA	GA	GA	AA	AA	AA	AA	AA	AA	GA	AA	GA	GA	GA	GA	GA	GA	GA	AA	GA	GA
contig5005_82	G	C	GG	CC	CC	CC	CC	CG	CG	GG	CG	GG	CG	CG	CC	GG	CG	CC	CG	GG	CG	GG	CG	CG	GG	CG	GG	CC	CC	GG	CG	CC	GG	GG	CC	CC	CC	CG	CG	CG	CG	GG	CG	CG	GG	GG	CG	GG	GG
contig783106_177	T	A	AT	TT	TT	TT	TT	AT	AT	AT	AT	AT	AT	AT	TT	AT	AT	TT	TT	TT	AT	AT	AT	AT	AT	AT	AT	TT	TT	AT	AT	TT	TT	TT	TT	TT	TT	AT	TT	AT	AT	AT	AT	AT	AT	AT	AT	AT	AT
contig11438_30	A	T	AA	TT	TT	TT	TT	TA	TA	AA	TA	AA	TA	TA	TT	AA	TA	TT	TA	TA	TA	AA	TA	TA	AA	TA	AA	TA	TT	AA	TA	TT	TA	TA	TT	TA	TA	TA	TA	TA	TA	AA	TA	TA	TA	TA	TA	TA	AA
contig5005_52	G	A	GG	AA	AA	AA	AA	AG	AG	GG	AG	GG	AG	AG	AA	GG	AG	AA	AG	GG	AG	GG	AG	AG	GG	AG	GG	AA	AA	GG	AG	AA	GG	GG	AA	AA	AA	AG	AG	AG	AG	GG	AG	AG	AG	AG	AG	GG	GG
contig113_44	T	A	AT	TT	TT	TT	TT	AT	AT	AT	AT	AT	AT	TT	TT	AT	AT	TT	TT	TT	AT	AT	AT	AT	AT	AT	AT	TT	TT	AT	AT	TT	TT	TT	TT	TT	TT	AT	TT	AT	AT	AT	AT	AT	AT	AT	TT	AT	AT
contig602728_32	T	C	CT	TT	TT	TT	TT	CT	CT	CT	CT	CT	CT	CT	TT	CT	CT	TT	TT	TT	CT	CT	CT	CT	CT	CT	CT	TT	TT	CT	CT	TT	TT	TT	TT	TT	TT	CT	TT	CT	CT	CT	CT	CT	CT	CT	CT	CT	CT
contig729514_73	G	T	TG	GG	GG	GG	GG	TG	TG	TG	TG	TG	TG	TG	GG	TG	TG	GG	GG	GG	TG	TG	TG	TG	TG	TG	TG	GG	GG	TG	TG	GG	GG	GG	GG	GG	GG	TG	GG	TG	TG	TG	TG	TG	TG	TG	TG	TG	TG
contig45097_167	A	G	AA	GG	GG	GG	GG	GA	GA	AA	GA	AA	GA	GA	GG	AA	GA	GG	GA	GA	GA	AA	GA	GA	AA	GA	AA	GA	GG	AA	GA	GG	GA	GA	GA	GA	GA	GA	GA	GA	GA	AA	GA	GA	GA	GA	GA	GA	AA
contig30205_28	C	A	AC	CC	CC	CC	CC	AC	AC	AC	AC	AC	AC	AC	CC	AC	AC	CC	CC	CC	AC	AC	AC	AC	AC	AC	AC	CC	CC	AC	AC	CC	CC	CC	CC	CC	CC	AC	CC	AC	AC	AC	AC	AC	AC	AC	AC	AC	AC
contig30205_31	T	A	AT	TT	TT	TT	TT	AT	AT	AT	AT	AT	AT	AT	TT	AT	AT	TT	TT	TT	AT	AT	AT	AT	AT	AT	AT	TT	TT	AT	AT	TT	TT	TT	TT	TT	TT	AT	TT	AT	AT	AT	AT	AT	AT	AT	AT	AT	AT
contig45097_155	A	T	TT	AA	AA	AA	AA	TA	TA	TT	TA	TT	TA	TA	AA	TT	TA	AA	TA	TA	TA	TT	TA	TA	TT	TA	TT	TA	AA	TT	TA	AA	TA	TA	TA	TA	TA	TA	TA	TA	TA	TT	TA	TA	TA	TA	TA	TA	TT
contig15702_76	A	G	GA	AA	AA	AA	AA	GA	GA	GA	GA	GA	GA	GA	AA	GA	GA	AA	AA	AA	GA	GA	GA	GA	GA	GA	GA	AA	AA	GA	GA	AA	AA	AA	AA	AA	AA	GA	AA	GA	GA	GA	GA	GA	GA	GA	GA	GA	GA
contig518468_19	C	T	TC	CC	CC	CC	CC	TC	TC	TC	TC	TC	TC	TC	CC	TC	TC	CC	CC	CC	TC	TC	TC	TC	TC	TC	TC	CC	CC	TC	TC	CC	CC	CC	CC	CC	CC	TC	CC	TC	TC	TC	TC	TC	TC	TC	TC	TC	TC
contig30205_237	A	G	AA	GG	GG	GG	GG	GA	GA	AA	GA	AA	GA	GA	GG	AA	GA	GG	GA	GA	GA	AA	GA	GA	AA	GA	AA	GA	GG	AA	GA	GG	GA	GA	GA	GA	GA	GA	GA	GA	GA	AA	GA	GA	GA	GA	GA	GA	AA
contig16107_203	A	G	AA	GG	GG	GG	GG	GA	GA	AA	GA	AA	GA	GA	GG	AA	GA	GG	GA	GA	GA	AA	GA	GA	AA	GA	AA	GA	GG	AA	GA	GG	GA	GA	GA	GA	GA	GA	GA	GA	GA	AA	GA	GA	GA	GA	GA	GA	AA
contig45097_240	C	T	CC	TT	TT	TT	TT	TC	TC	CC	TC	CC	TC	TC	TT	CC	TC	TT	TC	TC	TC	CC	TC	TC	CC	TC	CC	TC	TT	CC	TC	TT	TC	TC	TC	TC	TC	TC	TC	TC	TC	CC	TC	TC	TC	TC	TC	TC	CC
contig4439_128	G	A	AG	GG	GG	GG	GG	AG	AG	AG	AG	AG	AG	AG	GG	AG	AG	GG	GG	GG	AG	AG	AG	AG	AG	AG	AG	GG	GG	AG	AG	GG	GG	GG	GG	GG	GG	AG	GG	AG	AG	AG	AG	AG	AG	AG	AG	AG	AG
contig4439_245	G	C	GG	CC	CC	CC	CC	CG	CG	GG	CG	GG	CG	CG	CC	GG	CG	CC	CG	CG	CG	GG	CG	GG	GG	CG	GG	CG	CC	GG	CG	CC	CG	CG	CG	CG	CG	CG	CG	CG	CG	GG	CG	CG	CG	CG	CG	CG	GG
contig502675_112	G	A	GG	AA	AA	AA	AA	AG	AG	GG	AG	GG	AG	AG	AA	GG	AG	AA	AG	AG	AG	GG	AG	AG	GG	AG	GG	AG	AA	GG	AG	AA	AG	AG	AG	AG	AG	AG	AG	AG	AG	GG	AG	AG	AG	AG	AG	AG	GG
contig386668_71	G	A	GG	AA	AA	AA	AA	AG	AG	GG	AG	GG	AG	AG	AA	GG	AG	AA	AG	AG	AG	GG	AG	AG	GG	AG	GG	AG	AA	GG	AG	AA	AG	AG	AG	AA	AG	AG	AG	AG	AG	GG	AG	AG	AG	AG	AG	AG	GG
contig53771_142	A	C	CA	AA	AA	AA	AA	CA	CA	CA	CA	CA	CA	CA	AA	CA	CA	AA	AA	AA	CA	CA	CA	CA	CA	CA	CA	AA	AA	CA	CA	AA	AA	AA	AA	AA	AA	CA	AA	CA	CA	CA	CA	CA	CA	AA	CA	CA	CA
contig76932_42	C	T	TC	CC	CC	CC	CC	TC	TC	TC	TC	TC	TC	TC	CC	TC	TC	CC	CC	CC	TC	TC	TC	TC	TC	TC	TC	CC	CC	TC	TC	CC	CC	CC	CC	CC	CC	TC	CC	TC	TC	TC	TC	TC	TC	CC	TC	TC	TC
contig386668_116	G	A	GG	AA	AA	AA	AA	AG	AG	GG	AG	GG	AG	AG	AA	GG	AG	AA	AG	AA	AG	GG	AG	AG	GG	AG	GG	AG	AA	GG	AG	AA	AG	AG	AG	AA	AG	AG	AG	AG	AG	GG	AG	AG	AG	AG	AG	AG	GG
contig53771_153	A	G	GA	AA	AA	AA	AA	GA	GA	GA	GA	GA	GA	GA	AA	GA	GA	AA	AA	AA	GA	GA	GA	GA	GA	GA	GA	AA	AA	GA	GA	AA	AA	AA	AA	AA	AA	GA	AA	GA	GA	GA	GA	GA	GA	AA	GA	GA	GA
contig33362_92	G	A	AG	GG	GG	GG	GG	GG	GG	AG	GG	AG	GG	GG	GG	AG	GG	GG	AG	GG	GG	AG	GG	GG	AG	GG	AG	AG	GG	AG	GG	GG	AG	AG	AG	GG	AG	GG	AG	GG	GG	AG	GG	GG	AG	AG	AG	GG	AG
contig27193_97	C	T	TC	CC	CC	CC	CC	CC	CC	TC	CC	TC	CC	CC	CC	TC	CC	CC	TC	TC	CC	TC	CC	CC	TC	CC	TC	TC	CC	TC	CC	CC	TC	TC	TC	CC	TC	CC	TC	CC	CC	TC	CC	CC	TC	TC	TC	CC	TC
contig16749_83	A	T	TA	AA	AA	AA	AA	AA	AA	TA	AA	TA	AA	AA	AA	TA	AA	AA	TA	TA	AA	TA	AA	AA	TA	AA	TA	TA	AA	TA	AA	AA	TA	TA	TA	AA	TA	AA	TA	AA	AA	TA	AA	AA	TA	TA	TA	AA	TA
contig33362_7	G	C	GG	CC	CC	CC	CC	CG	CG	GG	CG	GG	CG	CG	CC	GG	CG	CC	CG	CC	CG	GG	CG	CG	GG	CG	GG	CG	CC	GG	CG	CC	CG	GG	CG	CC	CG	CG	CG	CG	CG	GG	CG	CG	GG	GG	GG	CG	GG
contig964449_39	T	A	TT	AT	AA	AA	AA	AT	AT	TT	TT	TT	AT	AT	AA	TT	AT	AA	AT	AT	AT	TT	AT	AT	TT	AT	TT	AA	AA	TT	AT	AA	AA	TT	AT	AA	AT	AT	AT	AT	AT	TT	AT	AT	AT	AT	AT	AT	TT
contig570560_34	T	C	CT	CT	TT	TT	TT	TT	TT	CT	CT	CT	TT	TT	TT	CT	TT	TT	CT	CT	TT	CT	TT	TT	CT	TT	CT	TT	TT	CT	TT	TT	TT	CT	CT	TT	CT	TT	CT	TT	TT	CT	TT	TT	CT	CT	CT	TT	CT
contig570560_43	G	A	AG	AG	GG	GG	GG	GG	GG	AG	AG	AG	GG	GG	GG	AG	GG	GG	AG	AG	GG	AG	GG	GG	AG	GG	AG	GG	GG	AG	GG	GG	GG	AG	AG	GG	AG	GG	AG	GG	GG	AG	GG	GG	AG	AG	AG	GG	AG
contig570560_94	G	A	AG	AG	GG	GG	GG	GG	GG	AG	AG	AG	GG	GG	GG	AG	GG	GG	AG	AG	GG	AG	GG	GG	AG	GG	AG	GG	GG	AG	GG	GG	GG	AG	AG	GG	AG	GG	AG	GG	GG	AG	GG	GG	AG	AG	AG	GG	AG
contig66689_162	C	A	AC	AC	CC	CC	CC	CC	CC	AC	AC	AC	CC	CC	CC	AC	CC	CC	AC	AC	CC	AC	CC	CC	AC	CC	AC	CC	CC	AC	CC	CC	CC	AC	AC	CC	AC	CC	AC	CC	CC	AC	CC	CC	AC	AC	AC	CC	AC
contig781828_129	A	T	TA	TA	AA	AA	AA	AA	AA	TA	TA	TA	AA	AA	AA	TA	AA	AA	TA	TA	AA	TA	AA	AA	TA	AA	TA	AA	AA	TA	AA	AA	AA	TA	TA	AA	TA	AA	TA	AA	AA	TA	AA	AA	TA	TA	TA	AA	TA
contig15198_87	C	T	CC	CC	TT	TT	TT	TC	TC	CC	CC	CC	TC	TC	TT	CC	TC	TT	TC	TC	TC	CC	TC	TC	CC	TC	CC	TT	TT	CC	TC	TT	TT	TC	CC	TT	TC	TC	TC	TC	TC	CC	TC	TC	TC	TC	TC	TC	CC
contig964449_45	C	T	CC	TC	TT	TT	TT	TC	TC	CC	CC	CC	TC	TC	TT	CC	TC	TT	TC	TC	TC	CC	TC	TC	CC	TC	CC	TT	TT	CC	TC	TT	TT	TC	TC	TT	TC	TC	TC	TC	TC	CC	TC	TC	TC	TC	TC	TC	CC
contig84792_92	T	C	CT	TT	TT	TT	TT	CT	CT	CT	CT	CT	CT	CT	TT	CT	CT	TT	TT	TT	CT	CT	CT	CT	CT	CT	CT	TT	TT	CT	CT	TT	TT	TT	TT	TT	TT	CT	TT	CT	CT	CT	CT	CT	CT	CT	CT	CT	CT
contig15198_159	T	C	TT	CT	CC	CC	CC	CT	CT	TT	TT	TT	CT	CT	CC	TT	CT	CC	CT	CT	CT	TT	CT	CT	TT	CT	TT	CC	CC	TT	CT	CC	CC	CT	CT	CC	CT	CT	CT	CT	CT	TT	CT	CT	CT	CT	CT	CT	TT
contig15198_75	C	T	CC	TC	TT	TT	TT	TC	TC	CC	CC	CC	TC	TC	TT	CC	TC	TT	TC	TC	TC	CC	TC	TC	CC	TC	CC	TT	TT	CC	TC	TT	TT	TC	TC	TT	TC	TC	TC	TC	TC	CC	TC	TC	TC	TC	TC	TC	CC
contig964449_43	G	A	GG	AG	AA	AA	AA	AG	AG	GG	GG	GG	AG	AG	AA	GG	AG	AA	AG	AG	AG	GG	AG	AG	GG	AG	GG	AA	AA	GG	AG	AA	AA	AG	AG	AA	AG	AG	AG	AG	AG	GG	AG	AG	AG	AG	AG	AG	GG
contig415548_26	C	G	GC	GC	CC	CC	CC	CC	CC	GC	GC	GC	CC	CC	CC	GC	CC	CC	GC	GC	CC	GC	CC	CC	GC	CC	GC	CC	CC	GC	CC	CC	CC	GC	GC	CC	GC	CC	GC	CC	CC	GC	CC	CC	GC	GC	GC	CC	GC
contig15198_143	C	A	CC	AA	AA	AA	AA	AC	CC	CC	CC	CC	AC	AC	AA	CC	AC	AA	AC	AC	AC	CC	AC	AC	CC	AC	CC	AA	AA	CC	AC	AA	AA	AC	AA	AA	AC	AC	AC	AC	AC	CC	CC	AC	AC	AC	AC	CC	CC
contig56874_167	A	T	TA	AA	TA	AA	AA	TA	TA	TA	TA	TA	TA	TA	AA	TA	TA	AA	AA	AA	TA	TA	TA	TA	TA	TA	TA	AA	AA	TA	TA	AA	AA	AA	AA	AA	AA	TA	AA	TA	TA	TA	TA	TA	TA	TA	TA	TA	TA
contig66689_185	C	T	TC	CC	CC	CC	CC	TC	TC	TC	TC	TC	TC	TC	CC	TC	TC	CC	CC	CC	TC	TC	TC	TC	TC	TC	TC	CC	CC	TC	TC	CC	CC	CC	CC	CC	CC	TC	CC	TC	TC	TC	TC	TC	TC	TC	TC	TC	TC
contig17319_61	T	C	CT	TT	CT	TT	TT	CT	CT	CT	CT	CT	CT	CT	TT	CT	CT	TT	TT	TT	CT	CT	CT	CT	CT	CT	CT	TT	TT	CT	CT	TT	TT	TT	TT	TT	TT	CT	TT	CT	CT	CT	CT	CT	CT	CT	CT	CT	CT
contig76044_10	G	A	AG	GG	AG	GG	GG	AG	AG	AG	AG	AG	AG	AG	GG	AG	AG	GG	GG	GG	AG	AG	AG	AG	AG	AG	AG	GG	GG	AG	AG	GG	GG	GG	GG	GG	GG	AG	GG	AG	AG	AG	AG	AG	AG	AG	AG	AG	AG
contig42809_215	A	T	TA	AA	TA	AA	AA	TA	TA	TA	TA	TA	TA	TA	AA	TA	TA	AA	AA	AA	TA	TA	TA	TA	TA	TA	TA	AA	AA	TA	TA	AA	AA	AA	AA	AA	AA	TA	AA	TA	TA	TA	TA	TA	TA	TA	AA	TA	TA
contig17319_38	C	T	TC	CC	TC	CC	CC	TC	TC	TC	TC	TC	TC	TC	CC	TC	TC	CC	CC	CC	TC	TC	TC	TC	TC	TC	TC	CC	CC	TC	TC	CC	CC	CC	CC	CC	CC	TC	CC	TC	TC	TC	TC	TC	TC	TC	TC	TC	TC
contig8546_54	G	A	AG	GG	AG	GG	GG	AG	AG	AG	AG	AG	AG	AG	GG	AG	AG	GG	GG	GG	AG	AG	AG	AG	AG	AG	AG	GG	GG	AG	AG	GG	GG	GG	GG	GG	GG	AG	GG	AG	AG	AG	AG	AG	AG	AG	AG	AG	AG
contig372731_57	G	T	TG	GG	GG	GG	GG	TG	TG	TG	TG	TG	TG	TG	GG	TG	TG	GG	GG	GG	TG	TG	TG	TG	TG	TG	TG	GG	GG	TG	TG	GG	GG	GG	GG	GG	GG	TG	GG	TG	TG	TG	TG	TG	TG	TG	TG	TG	TG
contig781828_35	C	A	AC	CC	CC	CC	CC	AC	AC	AC	AC	AC	AC	AC	CC	AC	AC	CC	CC	CC	AC	AC	AC	AC	AC	AC	AC	CC	CC	AC	AC	CC	CC	CC	CC	CC	CC	AC	CC	AC	AC	AC	AC	AC	AC	AC	AC	AC	AC
contig781828_41	C	T	CC	TC	TT	TT	TT	CC	CC	CC	CC	CC	TC	CC	TT	CC	CC	TT	TC	TC	TC	CC	TC	CC	CC	TC	CC	TT	TT	CC	TC	TT	TT	TC	TT	TT	TC	TC	TC	TC	TC	CC	TC	TC	CC	CC	CC	TC	CC
contig31628_194	T	C	CT	TT	TT	TT	TT	CT	CT	CT	CT	CT	CT	CT	TT	CT	CT	TT	TT	TT	CT	CT	CT	CT	CT	CT	CT	TT	TT	CT	CT	TT	TT	TT	TT	TT	TT	CT	TT	CT	CT	CT	CT	CT	CT	CT	CT	CT	CT
contig66689_181	A	G	GA	AA	AA	AA	AA	GA	GA	GA	GA	GA	GA	GA	AA	GA	GA	AA	AA	AA	GA	GA	GA	GA	GA	GA	GA	AA	AA	GA	GA	AA	AA	AA	AA	AA	AA	GA	AA	GA	GA	GA	GA	GA	GA	GA	GA	GA	GA
contig578595_129	C	T	TC	CC	CC	CC	CC	TC	TC	TC	TC	TC	TC	TC	CC	TC	TC	CC	CC	CC	TC	TC	TC	TC	TC	TC	TC	CC	CC	TC	TC	CC	CC	CC	CC	CC	CC	TC	CC	TC	TC	TC	TC	TC	TC	TC	TC	TC	TC
contig531123_135	G	C	CG	GG	GG	GG	GG	CG	CG	CG	CG	CG	CG	CG	GG	CG	CG	GG	GG	GG	CG	CG	CG	CG	CG	CG	CG	GG	GG	CG	CG	GG	GG	GG	GG	GG	GG	CG	GG	CG	CG	CG	CG	CG	CG	CG	CG	CG	CG
contig531123_182	G	C	CG	GG	GG	GG	GG	CG	CG	CG	CG	CG	CG	CG	GG	CG	CG	GG	GG	GG	CG	CG	CG	CG	CG	CG	CG	GG	GG	CG	CG	GG	GG	GG	GG	GG	GG	CG	GG	CG	CG	CG	CG	CG	CG	CG	CG	CG	CG
contig531123_106	G	A	AG	GG	GG	GG	GG	AG	AG	AG	AG	AG	AG	AG	GG	AG	AG	GG	GG	GG	AG	AG	AG	AG	AG	AG	AG	GG	GG	AG	AG	GG	GG	GG	GG	GG	GG	AG	GG	AG	AG	AG	AG	AG	AG	AG	AG	AG	AG
contig25293_89	T	G	GT	TT	TT	TT	TT	GT	GT	GT	GT	TT	GT	GT	TT	GT	GT	TT	TT	TT	GT	GT	TT	GT	GT	GT	GT	TT	TT	GT	TT	TT	TT	TT	TT	TT	TT	TT	TT	GT	TT	GT	GT	GT	GT	GT	GT	GT	GT
contig578595_19	G	A	GG	AA	AA	AA	AA	AG	AG	GG	GG	GG	AG	AG	AA	GG	AG	AA	AG	AA	AG	GG	AG	AG	GG	AG	GG	AA	AA	GG	AG	AA	AA	AG	AG	AA	AG	AG	AG	AG	AG	GG	AG	AG	GG	GG	GG	AG	GG
contig41989_132	A	T	TA	AA	AA	AA	AA	TA	TA	TA	TA	TA	TA	TA	AA	TA	TA	AA	AA	AA	TA	TA	TA	TA	TA	TA	TA	AA	AA	TA	TA	AA	AA	AA	AA	AA	AA	TA	AA	TA	TA	TA	TA	TA	TA	TA	TA	TA	TA
contig578595_15	G	A	AG	GG	GG	GG	GG	AG	AG	AG	AG	AG	AG	AG	GG	AG	AG	GG	GG	GG	AG	AG	AG	AG	AG	AG	AG	GG	GG	AG	AG	GG	GG	GG	GG	GG	GG	AG	GG	AG	AG	AG	AG	AG	AG	AG	AG	AG	AG
contig578595_2	C	T	CC	TT	TT	TT	TT	TC	TC	CC	CC	CC	TC	TC	TT	CC	TC	TT	TC	TT	TC	CC	TC	TC	CC	TC	CC	TT	TT	CC	TC	TT	TT	TC	TC	TT	TC	TC	TC	TC	TC	CC	TC	TC	CC	CC	CC	TC	CC
contig33362_183	G	A	AG	GG	GG	GG	GG	AG	AG	AG	AG	AG	AG	AG	GG	AG	AG	GG	GG	GG	AG	AG	AG	AG	AG	AG	AG	GG	GG	AG	AG	GG	GG	GG	GG	GG	GG	AG	GG	AG	AG	AG	AG	AG	AG	AG	AG	AG	AG
contig531123_46	A	G	AA	GA	GG	GG	GG	GA	AA	AA	AA	AA	GA	GA	GG	AA	GA	GG	GA	GA	GA	AA	GA	AA	AA	GA	AA	GG	GG	AA	GA	GG	GG	GA	GA	GG	GA	GA	GA	GA	AA	AA	GA	GA	AA	AA	AA	GA	AA
contig16749_93	G	T	TG	GG	GG	GG	GG	TG	TG	TG	TG	TG	TG	TG	GG	TG	TG	GG	GG	GG	TG	TG	TG	TG	TG	TG	TG	GG	GG	TG	TG	GG	GG	GG	GG	GG	GG	TG	GG	TG	TG	TG	TG	TG	TG	TG	TG	TG	TG
contig16749_144	G	A	AG	GG	GG	GG	GG	AG	AG	AG	AG	AG	AG	AG	GG	AG	AG	GG	GG	GG	AG	AG	AG	AG	AG	AG	AG	GG	GG	AG	AG	GG	GG	GG	GG	GG	GG	AG	GG	AG	AG	AG	AG	AG	AG	AG	AG	AG	AG
contig33362_107	C	T	TC	CC	CC	CC	CC	TC	TC	TC	TC	TC	TC	TC	CC	TC	TC	CC	CC	CC	TC	TC	TC	TC	TC	TC	TC	CC	CC	TC	TC	CC	CC	CC	CC	CC	CC	TC	CC	TC	TC	TC	TC	TC	TC	TC	TC	TC	TC
contig800030_37	A	G	GA	AA	AA	AA	AA	GA	GA	GA	GA	GA	GA	GA	AA	GA	GA	AA	AA	AA	GA	GA	GA	GA	GA	GA	GA	AA	AA	GA	GA	AA	AA	AA	AA	AA	AA	GA	AA	GA	GA	GA	GA	GA	GA	GA	GA	GA	GA
contig545287_67	A	G	GA	AA	AA	AA	AA	GA	GA	GA	GA	GA	GA	GA	AA	GA	GA	AA	AA	AA	GA	GA	GA	GA	GA	GA	GA	AA	AA	GA	GA	AA	AA	AA	AA	AA	AA	GA	AA	GA	GA	GA	GA	GA	GA	GA	GA	GA	GA
contig28935_115	A	C	CA	AA	AA	AA	AA	CA	CA	CA	CA	CA	CA	CA	AA	CA	CA	AA	AA	AA	CA	CA	CA	CA	CA	CA	CA	AA	AA	CA	CA	AA	AA	AA	AA	AA	AA	CA	AA	CA	CA	CA	CA	CA	CA	CA	CA	CA	CA
contig41989_76	A	C	CA	AA	AA	AA	AA	CA	CA	CA	CA	CA	CA	CA	AA	CA	CA	AA	AA	AA	CA	CA	CA	CA	CA	CA	CA	AA	AA	CA	CA	AA	AA	AA	AA	AA	AA	CA	AA	CA	CA	CA	CA	CA	CA	CA	CA	CA	CA
contig41989_77	G	T	TG	GG	GG	GG	GG	TG	TG	TG	TG	TG	TG	TG	GG	TG	TG	GG	GG	GG	TG	TG	TG	TG	TG	TG	TG	GG	GG	TG	TG	GG	GG	GG	GG	GG	GG	TG	GG	TG	TG	TG	TG	TG	TG	TG	TG	TG	TG
contig583544_29	G	C	CG	GG	GG	GG	GG	GG	GG	CG	CG	CG	GG	GG	GG	CG	GG	GG	CG	CG	GG	CG	GG	GG	CG	GG	CG	GG	GG	CG	GG	GG	CG	CG	CG	GG	CG	GG	CG	GG	GG	CG	GG	GG	CG	CG	CG	GG	CG
contig33362_34	G	A	AG	GG	GG	GG	GG	AG	AG	AG	AG	AG	AG	AG	GG	AG	AG	GG	GG	GG	AG	AG	AG	AG	AG	AG	AG	GG	GG	AG	AG	GG	GG	GG	GG	GG	GG	AG	GG	AG	AG	AG	AG	AG	AG	AG	AG	AG	AG
contig583544_86	C	T	TC	CC	CC	CC	CC	CC	CC	TC	TC	TC	CC	CC	CC	TC	CC	CC	TC	TC	CC	TC	CC	CC	TC	CC	TC	CC	CC	TC	CC	CC	TC	TC	TC	CC	TC	CC	TC	CC	CC	TC	CC	CC	TC	TC	TC	CC	TC
contig800030_92	A	G	GA	GA	AA	AA	AA	AA	AA	GA	GA	GA	AA	AA	AA	GA	AA	AA	GA	GA	AA	GA	AA	AA	GA	AA	GA	AA	AA	GA	AA	AA	GA	GA	GA	AA	GA	AA	GA	AA	AA	GA	AA	AA	GA	GA	GA	AA	GA
contig53771_170	C	T	CC	TT	TT	TT	TT	TC	TC	CC	TC	CC	TC	TC	TT	CC	TC	TT	TC	TC	TC	CC	TC	TC	CC	TC	CC	TC	TT	CC	TC	TT	TC	TC	TC	TT	TC	TC	TC	TC	TC	CC	TC	TC	TC	TC	TC	CC	CC
contig33362_167	G	A	GG	AA	AA	AA	AA	AG	AG	GG	AG	GG	AG	AG	AA	GG	AG	AA	AG	AA	AG	GG	AG	AG	GG	AG	GG	AG	AA	GG	AG	AA	AG	AG	AG	AA	AG	AG	AG	AG	AG	GG	AG	AG	AG	AG	AG	AG	GG
contig86515_48	C	T	CC	TT	TT	TT	TT	TC	TC	CC	CC	CC	TC	TC	TT	CC	TC	TT	TC	TC	TC	CC	TC	TC	CC	TC	CC	TT	TT	CC	TC	TT	TC	TC	TC	TT	TC	TC	TC	TC	TC	CC	TC	TC	TC	TC	TC	TC	CC
contig800030_137	T	C	TT	CT	CC	CC	CC	CT	CT	TT	TT	TT	CT	CT	CC	TT	CT	CC	CT	CT	CT	TT	CT	CT	TT	CT	TT	CC	CC	TT	CT	CC	CT	CT	CT	CC	CT	CT	CT	CT	CT	TT	CT	CT	CT	CT	CT	CT	TT
contig53771_113	A	T	AA	TT	TT	TT	TT	TA	TA	AA	TA	AA	TA	TA	TT	AA	TA	TT	TA	TA	TA	AA	TA	TA	AA	TA	AA	TA	TT	AA	TA	TT	TA	TA	TA	TT	TA	TA	TA	TA	TA	AA	TA	TA	TA	TA	TA	AA	AA
contig730930_62	A	G	AA	GG	GG	GG	GG	GA	GA	AA	AA	AA	GA	GA	GG	AA	GA	GG	GA	GA	GA	AA	GA	GA	AA	GA	AA	GA	GG	AA	GA	GG	GA	GA	GA	GG	GA	GA	GA	GA	GA	AA	GA	GA	GA	GA	GA	GA	AA
contig730930_95	C	T	CC	TT	TT	TT	TT	TC	TC	CC	CC	CC	TC	TC	TT	CC	TC	TT	TC	TC	TC	CC	TC	TC	CC	TC	CC	TC	TT	CC	TC	TT	TC	TC	TC	TT	TC	TC	TC	TC	TC	CC	TC	TC	TC	TC	TC	TC	CC
contig426585_54	C	T	TC	TC	CC	CC	CC	CC	CC	TT	TC	TC	CC	CC	CC	TC	CC	CC	TC	TC	CC	TC	CC	CC	TC	CC	CC	CC	CC	TC	CC	CC	CC	TC	TC	CC	TC	CC	TC	CC	CC	TC	CC	CC	TC	TC	TC	CC	TC
contig426585_57	C	T	TC	TC	CC	CC	CC	CC	CC	TT	TC	TC	CC	CC	CC	TC	CC	CC	TC	TC	CC	TC	CC	CC	TC	CC	CC	CC	CC	TC	CC	CC	CC	TC	TC	CC	TC	CC	TC	CC	CC	TC	CC	CC	TC	TT	TC	CC	TC
contig426585_43	A	T	TA	TA	AA	AA	AA	AA	AA	TT	TA	TA	AA	AA	AA	TA	AA	AA	TA	TA	AA	TA	AA	AA	TA	AA	AA	AA	AA	TA	AA	AA	AA	TA	TA	AA	TA	AA	TA	AA	AA	TA	AA	AA	TA	TT	TA	AA	TA
contig426585_63	T	C	CT	CT	TT	TT	TT	TT	TT	CC	CT	CT	TT	TT	TT	CT	TT	TT	CT	CT	TT	CT	TT	TT	CT	TT	TT	TT	TT	CT	TT	TT	TT	CT	CT	TT	CT	TT	CT	TT	TT	CT	TT	TT	CT	CC	CT	TT	CT
contig295020_8	G	A	AG	AG	GG	GG	GG	GG	GG	AG	AG	AG	GG	GG	GG	AG	GG	GG	AG	AG	GG	AG	GG	GG	AG	GG	AG	GG	GG	AG	GG	GG	GG	AG	AG	GG	AG	GG	AG	GG	GG	AG	GG	GG	AG	AG	AG	GG	AG
contig42809_204	C	T	TC	TC	CC	CC	CC	CC	CC	TC	TC	TC	CC	CC	CC	TC	CC	CC	TC	TC	CC	TC	CC	CC	TC	CC	TC	CC	CC	TC	CC	CC	CC	TC	TC	CC	TC	CC	TC	CC	CC	TC	CC	CC	TC	TC	TC	CC	TC
contig494054_46	T	C	CT	CT	TT	TT	TT	TT	TT	CT	CT	CT	TT	TT	TT	CT	TT	TT	CT	CT	TT	CT	TT	TT	CT	TT	CT	TT	TT	CT	TT	TT	TT	CT	CT	TT	CT	TT	CT	TT	TT	CT	TT	TT	CT	CT	CT	TT	CT
contig70326_99	A	G	GA	GA	AA	AA	AA	AA	AA	GA	GA	GA	AA	AA	AA	GA	AA	AA	GA	GA	AA	GA	AA	AA	GA	AA	GA	AA	AA	GA	AA	AA	AA	GA	GA	AA	GA	AA	GA	AA	AA	GA	AA	AA	GA	GA	GA	AA	GA
contig807242_126	G	C	CG	CG	GG	GG	GG	GG	GG	CG	CG	CG	GG	GG	GG	CG	GG	GG	CG	CG	GG	CG	GG	GG	CG	GG	CG	GG	GG	CG	GG	GG	GG	CG	CG	GG	CG	GG	CG	GG	GG	CG	GG	GG	CG	CG	GG	GG	CG
contig76044_43	G	A	AG	AG	GG	GG	GG	GG	GG	AG	AG	AG	GG	GG	GG	AG	GG	GG	AG	AG	GG	AG	GG	GG	AG	GG	AG	GG	GG	AG	GG	GG	GG	AG	AG	GG	AG	GG	AG	GG	GG	AG	GG	GG	AG	AG	AG	GG	AG
contig28038_81	C	T	TC	TC	CC	CC	CC	CC	CC	TC	TC	TC	CC	CC	CC	TC	CC	CC	TC	TC	CC	TC	CC	CC	TC	CC	TC	CC	CC	TC	CC	CC	CC	TC	TC	CC	TC	CC	TC	CC	CC	TC	CC	CC	TC	TC	TC	CC	TC
contig76044_81	G	A	AG	AG	GG	GG	GG	GG	GG	AG	AG	AG	GG	GG	GG	AG	GG	GG	AG	AG	GG	AG	GG	GG	AG	GG	AG	GG	GG	AG	GG	GG	GG	AG	AG	GG	AG	GG	AG	GG	GG	AG	GG	GG	AG	AG	AG	GG	AG
contig3166_128	C	T	TC	TC	CC	CC	CC	CC	CC	TC	TC	TC	CC	CC	CC	TC	CC	CC	TC	TC	CC	TC	CC	CC	TC	CC	TC	CC	CC	TC	CC	CC	CC	TC	TC	CC	TC	CC	TC	CC	CC	TC	CC	CC	TC	TC	TC	CC	TC
contig84792_182	G	C	CG	CG	GG	GG	GG	GG	GG	CG	CG	CG	GG	GG	GG	CG	GG	GG	CG	CG	GG	CG	GG	GG	CG	GG	CG	GG	GG	CG	GG	GG	GG	CG	CG	GG	CG	GG	CG	GG	GG	CG	GG	GG	CG	CG	CG	GG	CG
contig42809_53	A	G	GA	GA	AA	AA	AA	AA	AA	GA	GA	GA	AA	AA	AA	GA	AA	AA	GA	GA	AA	GA	AA	AA	GA	AA	GA	AA	AA	GA	AA	AA	AA	GA	GA	AA	GA	AA	GA	AA	AA	GA	AA	AA	GA	GA	GA	AA	GA
contig41089_241	C	T	TC	TC	CC	CC	CC	CC	CC	TC	TC	TC	CC	CC	CC	TC	CC	CC	TC	TT	CC	TC	CC	CC	TC	CC	TC	CC	CC	TC	CC	CC	CC	TC	TC	CC	TC	CC	TC	CC	CC	TC	CC	CC	TT	TT	TC	CC	TC
contig8546_208	G	A	GG	AG	AG	AA	AA	AG	AG	GG	GG	GG	AG	AG	AA	GG	AG	AA	AG	AG	AG	GG	AG	AG	GG	AG	GG	AA	AA	GG	AG	AA	AA	AG	AG	AA	AG	AG	AG	AG	AG	GG	AG	AG	AG	GG	AG	AG	GG
contig749256_88	C	A	CC	AC	AA	AA	AA	AC	AC	CC	CC	CC	AC	AC	AA	CC	AC	AA	CC	AC	AC	CC	AC	AC	CC	AC	CC	AA	AA	CC	AC	AA	AA	AC	CC	AA	CC	AC	AC	AC	AC	CC	AC	AA	AC	AC	AC	AC	CC
contig3166_26	A	G	GA	GA	AA	AA	AA	AA	AA	GA	GA	GA	AA	AA	AA	GA	AA	AA	GA	GA	AA	GA	AA	AA	GA	AA	GA	AA	AA	GA	AA	AA	AA	GA	GA	AA	GA	AA	GA	AA	AA	GA	AA	AA	AA	GA	GA	AA	GA
contig76044_173	C	T	TC	TC	CC	CC	CC	CC	CC	TC	TC	TC	CC	CC	CC	TC	CC	CC	TC	TC	CC	TC	CC	CC	TC	CC	TC	CC	CC	TC	CC	CC	CC	TC	TC	CC	TC	CC	TC	CC	CC	TC	CC	CC	CC	TC	TC	CC	TC
contig42809_229	C	T	CC	TC	TC	TT	TT	TC	TC	CC	CC	CC	TC	TC	TT	CC	TC	TT	TC	TC	TC	CC	TC	TC	CC	TC	CC	TT	TT	CC	TC	TT	TT	TC	TC	TT	TC	TC	TC	TC	TC	CC	TC	TC	TC	TC	TC	TC	CC
contig42809_160	T	G	GT	GT	TT	TT	TT	TT	TT	GT	GT	GT	TT	TT	TT	GT	TT	TT	GT	GT	TT	GT	TT	TT	GT	TT	GT	TT	TT	GT	TT	TT	TT	GT	GT	TT	GT	TT	GT	TT	TT	GT	TT	TT	TT	GT	GT	TT	GT
contig41089_218	A	G	GA	GA	AA	AA	AA	AA	AA	GA	GA	GA	AA	AA	AA	GA	AA	AA	GA	GG	AA	GA	AA	AA	GA	AA	GA	AA	AA	GA	AA	AA	AA	GA	GA	AA	GA	AA	GA	AA	AA	GA	AA	AA	GG	GG	GA	AA	GA
contig21169_136	A	C	AA	CA	CA	CC	CC	CA	CA	AA	CA	AA	CA	CA	CC	AA	CA	CC	CA	CA	CA	AA	CA	CA	AA	CA	AA	CC	CC	AA	CA	CC	CC	CA	CA	CC	CA	CA	CA	CA	CA	AA	CA	CA	CA	CA	CA	CA	AA
contig42809_211	G	A	AA	GG	AG	GG	GG	AG	AG	AA	AA	AA	AG	AG	GG	AA	AG	GG	GG	AG	AG	AA	AG	AG	AA	AG	AA	GG	GG	AA	AG	GG	GG	GG	GG	GG	GG	AG	GG	AG	AG	AA	AG	AG	AG	AG	AG	AG	AA
contig3166_82	A	C	AA	CA	CA	CC	CC	CA	CA	AA	AA	AA	CA	CA	CC	AA	CA	CC	CA	CA	CA	AA	CA	CA	AA	CA	AA	CC	CC	AA	CA	CC	CC	CA	CA	CC	CA	CA	CA	CA	CA	AA	CA	CA	CA	CA	CA	CA	AA
contig41089_164	T	G	TT	GT	GT	GG	GG	GT	GT	TT	TT	TT	GT	GT	GG	TT	GT	GG	GT	TT	GT	TT	GT	GT	TT	GT	TT	GG	GG	TT	GT	GG	GG	GT	GT	GG	GT	GT	GT	GT	GT	TT	GT	GT	GT	GT	GT	GT	TT
contig41089_6	A	G	AA	GA	GA	GG	GG	GA	GA	AA	AA	AA	GA	GA	GG	AA	GA	GG	GA	AA	GA	AA	GA	GA	AA	GA	AA	GG	GG	AA	GA	GG	GG	GA	GA	GG	GA	GA	GA	GA	GA	AA	GA	GA	GA	GA	GA	GA	AA
contig56874_145	T	G	TT	GT	GT	GG	GG	GT	GT	TT	TT	TT	GT	GT	GG	TT	GT	GG	GT	GT	GT	TT	GT	GT	TT	GT	TT	GG	GG	TT	GT	GG	GG	GT	GT	GG	GT	GT	GT	GT	GT	TT	GT	GT	GT	GT	GT	GT	TT
contig42809_213	A	C	AA	CA	CA	CC	CC	CA	CA	AA	AA	AA	CA	CA	CC	AA	CA	CC	CA	CA	CA	AA	CA	CA	AA	CA	AA	CC	CC	AA	CA	CC	CC	CA	CA	CC	CA	CA	CA	CA	CA	AA	CA	CA	CA	CA	CA	CA	AA
contig401834_63	C	T	CC	TC	TC	TT	TT	TC	TC	CC	CC	CC	TC	TC	TT	CC	TC	TT	TC	TC	TC	CC	TC	TC	CC	TC	CC	TT	TT	CC	TC	TT	TT	TC	TC	TT	TC	TC	TC	TC	TC	CC	TC	TC	TC	TC	TC	TC	CC
contig56874_47	A	G	AA	GA	GA	GG	GG	GA	GA	AA	AA	AA	GA	GA	GG	AA	GA	GG	GA	GA	GA	AA	GA	GA	AA	GA	AA	GG	GG	AA	GA	GG	GG	GA	GA	GG	GA	GA	GA	GA	GA	AA	GA	GA	GA	GA	GA	GA	AA
contig84792_164	G	A	GG	AG	AG	AA	AA	AG	AG	GG	GG	GG	AG	AG	AA	GG	AG	AA	AG	AG	AG	GG	AG	AG	GG	AG	GG	AA	AA	GG	AG	AA	AA	AG	AG	AA	AG	AG	AG	AG	AG	GG	AG	AG	AG	AG	AG	AG	GG
contig56874_144	A	G	AA	GA	GA	GG	GG	GA	GA	AA	AA	AA	GA	GA	GG	AA	GA	GG	GA	GA	GA	AA	GA	GA	AA	GA	AA	GG	GG	AA	GA	GG	GG	GA	GA	GG	GA	GA	GA	GA	GA	AA	GA	GA	GA	GA	GA	GA	AA
contig51386_78	A	T	AA	TA	TT	TT	TT	TA	TA	AA	AA	AA	TA	TA	TT	AA	TA	TT	TA	TA	TA	AA	TA	TA	AA	TA	AA	TT	TT	AA	TA	TT	TT	TA	TA	TT	TA	TA	TA	TA	TA	AA	TA	TA	TA	TA	TA	TA	AA
contig56874_115	T	C	TT	CT	CT	CC	CC	CT	CT	TT	TT	TT	CT	CT	CC	TT	CT	CC	CT	CT	CT	TT	CT	CT	TT	CT	TT	CC	CC	TT	CT	CC	CC	CT	CT	CC	CT	CT	CT	CT	CT	TT	CT	CT	CT	CT	TT	CT	TT
contig3800_129	C	G	GC	GC	CC	CC	CC	CC	CC	GC	GC	GC	CC	CC	CC	GC	CC	CC	GC	GC	CC	GC	CC	CC	GC	CC	GC	CC	CC	GC	CC	CC	CC	GC	GC	CC	GC	CC	GC	CC	CC	GC	CC	CC	GC	CC	GC	CC	GC
contig42626_82	T	G	GT	TT	GT	TT	TT	GT	GT	GT	TT	GT	GT	GT	TT	GT	GT	TT	TT	TT	GT	GT	GT	GT	GT	GT	GT	TT	TT	GT	GT	TT	TT	TT	TT	TT	TT	GT	TT	GT	GT	GT	GG	GT	GG	GT	GT	GT	GT
contig42626_17	C	G	CC	GC	GC	GG	GG	GC	GC	CC	GC	CC	GC	GC	GG	CC	GC	GG	GC	GC	GC	CC	GC	GC	CC	GC	CC	GG	GG	CC	GC	GG	GG	GC	GC	GG	GC	GC	GC	GC	GC	CC	GC	GC	CC	GC	CC	GC	CC
contig42626_3	C	A	CC	AC	AC	AA	AA	AC	AC	CC	AC	CC	AC	AC	AA	CC	AC	AA	AC	AC	AC	CC	AC	AC	CC	AC	CC	AA	AA	CC	AC	AA	AA	AC	AC	AA	AC	AC	AC	AC	AC	CC	AC	AC	AC	AC	CC	AC	CC
contig54597_149	T	C	CT	CT	TT	TT	TT	TT	TT	CT	CT	CT	TT	TT	TT	CT	TT	TT	CT	CT	TT	CT	TT	TT	CT	TT	CT	TT	TT	CT	TT	TT	TT	CT	CT	TT	CT	TT	CT	TT	TT	CT	TT	TT	CT	TT	CT	TT	CT
contig42626_62	C	A	AC	CC	AC	CC	CC	AC	AC	AC	CC	AC	AC	AC	AA	AC	AC	AA	CC	CC	AC	AC	AC	AC	AC	AC	AC	CC	CC	AC	AC	CC	CC	CC	CC	CC	CC	AC	CC	AC	AC	AC	AA	AC	CC	AC	AC	AC	AC
contig42626_54	T	C	CT	TT	CT	TT	TT	CT	CT	CT	TT	CT	CT	CT	CC	CT	CT	CC	TT	TT	CT	CT	CT	CT	CT	CT	CT	TT	TT	CT	CT	TT	TT	TT	TT	TT	TT	CT	TT	CT	CT	CT	CC	CT	CC	CT	CT	CT	CT
contig74052_51	G	C	CG	CG	GG	GG	GG	GG	GG	CG	CG	CG	GG	GG	GG	CG	GG	GG	CG	CG	GG	CG	GG	GG	CG	GG	CG	GG	GG	CG	GG	GG	GG	CG	CG	GG	CG	GG	CG	GG	GG	CG	GG	GG	CG	GG	CG	GG	CG
contig2087_78	C	T	TC	TC	CC	CC	CC	CC	CC	TC	TC	TC	CC	CC	CC	TC	CC	CC	TC	TC	CC	TC	CC	CC	TC	CC	CC	CC	CC	TC	CC	CC	CC	TC	TC	CC	TC	CC	TC	CC	CC	TC	CC	CC	CC	CC	TC	CC	TC
contig42626_207	C	A	CC	AC	AC	AA	AA	AC	AC	CC	AC	CC	AC	AC	AA	CC	AC	AA	AC	AC	AC	CC	AC	AC	CC	AC	CC	AA	AC	CC	AC	AA	AA	AC	AC	AA	AC	AC	AC	AC	AC	CC	AA	AC	AC	AC	CC	AC	CC
contig2087_76	C	T	TC	TC	CC	CC	CC	CC	CC	TC	TC	TC	CC	CC	CC	TC	CC	CC	TC	TC	CC	TC	CC	CC	TC	CC	CC	CC	CC	TC	CC	CC	CC	TC	TC	CC	TC	CC	TC	CC	CC	TC	CC	CC	CC	CC	TC	CC	TC
contig2087_275	T	C	CT	CT	TT	TT	TT	TT	TT	CT	CT	CT	TT	TT	TT	CT	TT	TT	CT	CT	TT	CT	TT	TT	CT	TT	TT	TT	TT	CT	TT	TT	TT	CT	CT	TT	CT	TT	CT	TT	TT	CT	TT	TT	TT	TT	CT	TT	CT
contig70752_9	G	A	AG	AG	GG	GG	GG	GG	GG	AG	AG	AG	GG	GG	GG	AG	GG	GG	AG	AG	GG	AG	GG	GG	AG	GG	AG	GG	GG	AG	GG	GG	GG	AG	AG	GG	AG	GG	AG	GG	GG	AG	GG	GG	GG	GG	AG	GG	AG
contig70752_48	C	A	AC	AC	CC	CC	CC	CC	CC	AC	AC	AC	CC	CC	CC	AC	CC	CC	AC	AC	CC	AC	CC	CC	AC	CC	AC	CC	CC	AC	CC	CC	CC	AC	AC	CC	AC	CC	AC	CC	CC	AC	CC	CC	CC	CC	AC	CC	AC
contig2087_79	A	C	CA	AA	CA	AA	AA	CA	CA	CA	AA	CA	CA	CA	AA	CA	CA	AA	AA	AA	CA	CA	CA	CA	CA	CA	CC	AA	AA	CA	CA	AA	AA	AA	AA	AA	AA	CA	AA	CA	CA	CA	CA	CA	CA	CA	CC	CA	CA
contig70752_99	G	A	AG	AG	GG	GG	GG	GG	GG	AG	AG	AG	GG	GG	GG	AG	GG	GG	AG	AG	GG	AG	GG	GG	AG	GG	AG	GG	GG	AG	GG	GG	GG	AG	AG	GG	AG	GG	AG	GG	GG	AG	GG	GG	GG	GG	AG	GG	AG
contig54597_84	G	A	AG	AG	GG	GG	GG	GG	GG	AG	AG	AG	GG	GG	GG	AG	GG	GG	AG	AG	GG	AG	GG	GG	AG	GG	AG	GG	GG	AG	GG	GG	GG	AG	AG	GG	AG	GG	AG	GG	GG	AG	GG	GG	GG	GG	AG	GG	AG
contig54597_143	T	C	CT	CT	TT	TT	TT	TT	TT	CT	CT	CT	TT	TT	TT	CT	TT	TT	CT	CT	TT	CT	TT	TT	CT	TT	CT	TT	TT	CT	TT	TT	TT	CT	CT	TT	CT	TT	CT	TT	TT	CT	TT	TT	CT	CT	CT	TT	CT
contig779353_46	G	C	CG	CG	GG	GG	GG	GG	GG	CG	CG	CG	GG	GG	GG	CG	GG	GG	CG	CG	GG	CG	GG	GG	CG	GG	CG	GG	GG	CG	GG	GG	GG	CG	CG	GG	CG	GG	CG	GG	GG	CG	GG	GG	CG	CG	CG	GG	CG
contig2087_50	A	G	AA	GA	GA	GG	GG	GA	GA	AA	GA	AA	GA	GA	GG	AA	GA	GG	GA	GA	GA	AA	GA	GA	AA	GA	AA	GG	GG	AA	GA	GG	GG	GA	GA	GG	GA	GA	GA	GA	GA	AA	GA	GA	GA	GA	AA	GA	AA
contig54597_92	G	T	TG	GG	TG	GG	GG	TG	TG	TG	GG	TG	TG	TG	GG	TG	TG	GG	GG	GG	TG	TG	TG	TG	TG	TG	TG	GG	GG	TG	TG	GG	GG	GG	GG	GG	GG	TG	GG	TG	TG	TG	TG	TG	TT	TT	GG	TT	TG
contig2087_207	C	T	CC	TC	TC	TT	TT	TC	TC	CC	TC	CC	TC	TC	TT	CC	TC	TT	TC	TC	TC	CC	TC	TC	CC	TC	CC	TT	TT	CC	TC	TT	TT	TC	TC	TT	TC	TC	TC	TC	TC	CC	TC	TC	TC	TC	CC	TC	CC
contig2087_258	C	T	TC	CC	TC	CC	CC	TC	TC	TC	CC	TC	TC	TC	CC	TC	TC	CC	CC	CC	TC	TC	TC	TC	TC	TC	TT	CC	CC	TC	TC	CC	CC	CC	CC	CC	CC	TC	CC	TC	TC	TC	TC	TC	TC	TC	TT	TC	TC
contig54597_110	G	A	AG	GG	AG	GG	GG	AG	AG	AG	GG	AG	AG	AG	GG	AG	AG	GG	GG	GG	AG	AG	AG	AG	AG	AG	AG	GG	GG	AG	AG	GG	GG	GG	GG	GG	GG	AG	GG	AG	AG	AG	AG	AG	AA	AA	GG	AA	AG
contig70326_117	G	A	AG	GG	AG	GG	GG	AG	AG	AG	GG	AG	AG	AG	GG	AG	AG	GG	GG	GG	AG	AG	AG	AG	AG	AG	AG	GG	GG	AG	AG	GG	GG	GG	GG	GG	GG	AG	GG	AG	AG	AG	AG	AG	AG	AG	GG	AG	AG
contig2087_189	G	A	GG	AG	AG	AA	AA	AG	AG	GG	AG	GG	AG	AG	AA	GG	AG	AA	AG	AG	AG	GG	AG	AG	GG	AG	GG	AA	AA	GG	AG	AA	AA	AG	AG	AA	AG	AG	AG	AG	AG	GG	AG	AG	AG	AG	GG	AG	GG
contig54597_162	A	G	GA	AA	GA	AA	AA	GA	GA	GA	AA	GA	GA	GA	AA	GA	GA	AA	AA	AA	GA	GA	GA	GA	GA	GA	GA	AA	AA	GA	GA	AA	AA	AA	AA	AA	AA	GA	AA	GA	GA	GA	GA	GA	GG	GG	GA	GG	GA
contig54597_72	T	C	CT	TT	CT	TT	TT	CT	CT	CT	TT	CT	CT	CT	TT	CT	CT	TT	TT	TT	CT	CT	CT	CT	CT	CT	CT	TT	TT	CT	CT	TT	TT	TT	TT	TT	TT	CT	TT	CT	CT	CT	CT	CT	CC	CC	CT	CC	CT
contig54597_48	C	G	CC	GC	GC	GG	GG	GC	GC	CC	GC	CC	GC	GC	GG	CC	GC	GG	GC	GC	GC	CC	GC	GC	CC	GC	CC	GG	GG	CC	GC	GG	GG	GC	GC	GG	GC	GC	GC	GC	GC	CC	GC	GC	GC	GC	CC	CC	CC
contig54597_170	A	T	TT	TA	TA	AA	AA	TA	TA	TT	TA	TT	TA	TA	AA	TT	TA	AA	TA	TA	TA	TT	TA	TA	TT	TA	TT	AA	AA	TT	TA	AA	AA	TA	TA	AA	TA	TA	TA	TA	TA	TT	TA	TA	TA	TA	TT	TT	TT
contig94075_250	T	G	GT	TT	GT	TT	TT	GT	GT	GT	TT	GT	GT	GT	TT	GT	GT	TT	TT	TT	GT	GT	GT	GT	GT	GT	GT	TT	TT	GT	GT	TT	TT	TT	TT	TT	TT	GT	TT	GT	GT	GT	GT	GT	GT	GT	GT	GT	GT
contig94075_253	G	T	TG	GG	TG	GG	GG	TG	TG	TG	GG	TG	TG	TG	GG	TG	TG	GG	GG	GG	TG	TG	TG	TG	TG	TG	TG	GG	GG	TG	TG	GG	GG	GG	GG	GG	GG	TG	GG	TG	TG	TG	TG	TG	TG	TG	TG	TG	TG
contig54597_126	T	A	TT	AT	AT	AA	AA	AT	AT	TT	AT	TT	AT	AT	AA	TT	AT	AA	AT	AT	AT	TT	AT	AT	TT	AT	TT	AA	AA	TT	AT	AA	AA	AT	AT	AA	AT	AT	AT	AT	AT	TT	AT	AT	TT	TT	TT	TT	TT
contig54597_161	C	T	CC	TC	TC	TT	TT	TC	TC	CC	TC	CC	TC	TC	TT	CC	TC	TT	TC	TC	TC	CC	TC	TC	CC	TC	CC	TT	TT	CC	TC	TT	TT	TC	TC	TT	TC	TC	TC	TC	TC	CC	TC	TC	CC	CC	CC	CC	CC
contig53479_21	A	T	AA	TA	TA	TT	TA	TA	TA	AA	TA	AA	TA	TA	TT	AA	TA	TT	TA	TA	TA	AA	TA	TA	AA	TA	AA	TT	TT	AA	TA	TT	TT	TA	TA	TT	TA	TA	TA	TA	TA	AA	TA	TA	AA	AA	AA	TA	AA
contig53479_65	A	C	AA	CA	CA	CC	CA	CA	CA	AA	CA	AA	CA	CA	CC	AA	CA	CC	CA	CA	CA	AA	CA	CA	AA	CA	AA	CC	CC	AA	CA	CC	CC	CA	CA	CC	CA	CA	CA	CA	CA	AA	CA	CA	AA	AA	AA	CA	AA
contig70752_145	G	A	AG	GG	AG	GG	GG	AG	AG	AG	GG	AG	AG	AG	GG	AG	AG	GG	GG	GG	AG	AG	AG	AG	AG	AG	AG	GG	GG	AG	AG	GG	GG	GG	GG	GG	GG	AG	GG	AG	AG	AG	AG	AG	AG	AG	AG	AG	AG
contig53479_40	T	C	CT	TT	CT	TT	TT	CT	CT	CT	TT	CT	CT	CT	TT	CT	CT	TT	TT	TT	CT	CT	CT	CT	CT	CT	CT	TT	TT	CT	CT	TT	TT	TT	TT	TT	TT	CT	TT	CT	CT	CT	CT	CT	CT	CT	CT	CT	CT
contig555417_9	C	G	GC	GC	CC	CC	GC	CC	CC	GC	GC	GC	CC	CC	CC	GC	CC	CC	CC	GC	CC	GC	CC	CC	GC	CC	GC	CC	CC	GC	CC	CC	CC	GC	GC	CC	GC	CC	GC	CC	CC	GC	CC	CC	CC	CC	CC	CC	GC
contig53479_112	A	T	AA	TA	TA	TT	TA	TA	TA	AA	TA	AA	TA	TA	TT	AA	TA	TT	TA	TA	TA	AA	TA	TA	AA	TA	AA	TT	TT	AA	TA	TT	TT	TA	TA	TT	TA	TA	TA	TA	TA	AA	TA	TA	AA	AA	AA	TA	AA
contig53479_168	C	T	CC	TC	TC	TT	TC	TC	TC	CC	TC	CC	TC	TC	TT	CC	TC	TT	TC	TC	TC	CC	TC	TC	CC	TC	CC	TT	TT	CC	TC	TT	TT	TC	TC	TT	TC	TC	TC	TC	TC	CC	TC	TC	CC	CC	CC	TC	CC
contig555417_150	G	A	AG	GG	AG	GG	GG	AG	AG	AG	GG	AG	AG	AG	GG	AG	AG	GG	GG	GG	AG	AG	AG	AG	AG	AG	AG	AG	GG	AG	AG	GG	GG	GG	GG	GG	GG	AG	GG	AG	AG	AG	AG	AG	AG	AG	AG	AG	AG
contig25715_19	C	G	GC	CC	GC	CC	CC	GC	GC	GC	CC	GC	GC	GC	CC	GC	GC	CC	CC	CC	GC	GC	GC	GC	GC	GC	GC	GC	CC	GC	GC	CC	CC	CC	CC	CC	CC	GC	CC	GC	GC	GC	GC	GC	GC	GC	GC	GC	GC
contig555417_149	A	G	GG	GA	GA	AA	GA	GA	GA	GG	GA	GG	GA	GA	AA	GG	GA	AA	GA	GA	GA	GG	GA	GA	GG	GA	GG	GA	AA	GG	GA	AA	AA	GA	GA	AA	GA	GA	GA	GA	GA	GG	GA	GA	GG	GG	GG	GA	GG
contig46376_218	C	T	TC	CC	TT	CC	CC	TT	TT	TC	CC	TC	TT	TT	CC	TC	TT	CC	CC	CC	TT	CC	TT	TT	TC	TT	TC	TT	CC	TC	TT	CC	CC	CC	CC	CC	CC	TC	CC	TC	TT	TC	TT	TT	TC	TC	TC	TT	TC
contig636477_79	A	G	AA	GA	GA	GG	GG	GA	GA	AA	GA	AA	GA	GA	GG	AA	GA	GG	GG	GA	GA	GA	GA	GA	AA	GA	AA	GA	GG	AA	GA	GG	GG	GA	GA	GG	GA	GA	GG	GA	GA	AA	GA	GA	GA	GA	GA	GA	AA
contig25892_28	G	A	GG	AG	AG	AA	AG	AG	AG	GG	AG	GG	AG	GG	AA	GG	AG	AA	AG	AG	AG	AG	AG	AG	GG	AG	GG	AG	AA	GG	AG	AA	AA	AG	AG	AA	AA	AG	AA	AG	AG	GG	AG	AG	AG	AG	AG	AG	GG
contig10351_27	G	T	TG	GG	TG	GG	GG	TG	TG	TG	GG	TG	TG	TG	GG	TG	TG	GG	GG	GG	TG	GG	TG	TG	TG	TG	TG	TG	GG	TG	TG	GG	GG	GG	GG	GG	GG	TG	GG	TG	TG	TG	TG	TG	TG	TG	TG	TG	TG
contig10351_72	A	G	GA	AA	GA	AA	AA	GA	GA	GA	AA	GA	GA	GA	AA	GA	GA	AA	AA	AA	GA	AA	GA	GA	GA	GA	GA	GA	AA	GA	GA	AA	AA	AA	AA	AA	AA	GA	AA	GA	GA	GA	GA	GA	GA	GA	GA	GA	GA
contig53387_92	A	G	GA	AA	GA	AA	AA	GA	GA	GA	AA	GA	GA	GA	AA	GA	GA	AA	AA	AA	GA	AA	GA	GA	GA	GA	GA	GA	AA	GA	GA	AA	AA	AA	AA	AA	AA	GA	AA	GA	GA	GA	GA	GA	GA	GA	GA	GA	GA
contig10351_82	A	T	TA	AA	TA	AA	AA	TA	TA	TA	AA	TA	TA	TA	AA	TA	TA	AA	AA	AA	TA	AA	TA	TA	TA	TA	TA	TA	AA	TA	TA	AA	AA	AA	AA	AA	AA	TA	AA	TA	TA	TA	TA	TA	TA	TA	TA	TA	TA
contig51854_103	C	T	TC	CC	TC	CC	CC	TC	TC	TC	CC	TC	TC	TC	CC	TC	TC	CC	CC	CC	TC	CC	TC	TC	TC	TC	TC	TC	CC	TC	TC	CC	CC	CC	CC	CC	CC	TC	CC	TC	TC	TC	TC	TC	TC	TC	TC	TC	TC
contig577826_143	G	A	AA	AG	AG	GG	AG	AA	AG	AA	AG	AA	AG	AG	GG	AA	AG	GG	AG	AG	AG	AG	AG	AG	AA	AG	AA	AA	GG	AA	AG	GG	GG	AG	GG	GG	AG	AA	GG	AG	AG	AA	AG	AA	AG	AG	AG	AG	AA
contig699004_87	A	T	TA	AA	TA	AA	AA	TA	TA	TA	AA	TA	TA	TA	AA	TA	TA	AA	AA	AA	TA	AA	TA	TA	TA	TA	TA	TA	AA	TA	TA	AA	AA	AA	AA	AA	AA	TA	AA	TA	TA	TA	TA	TA	TA	TA	TA	TA	TA
contig699004_30	T	A	AT	TT	AT	TT	TT	AT	AT	AT	TT	AT	AT	AT	TT	AT	AT	TT	TT	TT	AT	TT	AT	AT	AT	AT	AT	AT	TT	AT	AT	TT	TT	TT	TT	TT	TT	AT	TT	AT	AT	AT	AT	AT	AT	AT	AT	AT	AT
contig25892_248	C	T	CC	TC	TC	TT	TC	TC	TC	CC	TC	CC	TC	TC	TT	CC	TC	TT	TC	TC	TC	TC	TC	TC	CC	TC	CC	TC	TT	CC	TC	TT	TT	TC	TC	TT	CC	TC	TT	TC	TC	TC	TC	TC	TC	TC	TC	TC	CC
contig215_35	A	G	GA	AA	GA	AA	AA	GA	GA	GA	AA	GA	GA	GA	AA	GA	GA	AA	AA	AA	GA	AA	GA	GA	GA	GA	GA	GA	AA	GA	GA	AA	AA	AA	AA	AA	AA	GA	AA	GA	GA	GA	GA	GA	GA	GA	AA	GA	GA
contig636477_56	T	C	TT	CT	CT	CC	CT	CT	CT	TT	CT	TT	CT	CT	CC	TT	CT	CC	CT	CT	CT	CT	CT	CT	TT	CT	TT	CT	CC	TT	CT	CC	CC	CT	CT	CC	CT	CT	CC	CT	CT	TT	CT	CT	CT	CT	CT	CT	TT
contig577826_106	T	C	CC	CT	CT	TT	CT	CT	CT	CC	CT	CC	CT	CT	TT	CC	CT	TT	CT	CT	CT	CT	CT	CT	CC	CT	CC	CT	TT	CC	CT	TT	TT	CT	CT	TT	CT	CC	TT	CT	CT	CC	CT	CT	CT	CT	CT	CT	CC
contig636477_67	T	A	TT	AT	AT	AA	AT	AT	AT	TT	AT	TT	AT	AT	AA	TT	AT	AA	AT	AT	AT	AT	AT	AT	TT	AT	TT	AT	AA	TT	AT	AA	AA	AT	AT	AA	AT	AT	AA	AT	AT	TT	AT	AT	AT	AT	AT	AT	TT
contig53387_122	A	G	AA	GA	GA	GG	GA	GA	GA	AA	GA	AA	GA	GA	GG	AA	GA	GG	GA	GA	GA	GA	GA	GA	AA	GA	AA	GA	GG	AA	GA	GG	GG	GA	GA	GG	GA	AA	GG	GA	GA	AA	GA	GA	GA	GA	GA	GA	AA
contig9607_26	G	A	AA	AG	AG	GG	AG	AG	AG	AA	AG	AA	AG	AG	GG	AA	AG	GG	AG	AG	AG	AG	AG	AG	AA	AG	AA	AG	GG	AA	AG	GG	GG	AG	AG	GG	AG	AA	GG	AG	AG	AA	AG	AG	AG	AG	AG	AG	AA
contig596833_24	T	C	TT	CT	CT	CC	CT	CT	CT	TT	CT	TT	CT	CT	CC	TT	CT	CC	CT	CT	CT	CT	CT	CT	TT	CT	TT	CT	CC	TT	CT	CC	CC	CT	CT	CC	CT	TT	CC	CT	CT	TT	CT	CT	CT	CT	CT	CT	TT
contig49433_135	C	T	CC	TC	TC	TT	TC	TC	TC	CC	TC	CC	TC	TC	TT	CC	TC	TT	TC	TC	TC	TC	TC	TC	CC	TC	CC	TC	TT	CC	TC	TT	TT	TC	TC	TT	TC	CC	TT	TC	TC	CC	TC	TC	TC	TC	TC	TC	CC
contig8075_136	T	A	TT	AT	AT	AA	AT	AT	AT	TT	AT	TT	AT	AT	AT	TT	AT	AA	AT	AT	AT	AT	AT	AT	TT	AT	TT	AT	AA	TT	AT	AA	AA	AT	AT	AA	AT	TT	AA	AT	AT	TT	AT	AT	AT	AT	AT	AT	TT
contig699004_66	G	C	GG	CG	CG	CC	CG	CG	CG	GG	CG	GG	CG	CG	CC	GG	CG	CC	CG	CG	CG	CG	CG	CG	GG	CG	GG	CG	CC	GG	CG	CC	CC	CG	CG	CC	CG	GG	CC	CG	CG	GG	CG	CG	CG	CG	CG	CG	GG
contig49433_49	C	T	CC	TC	TC	TT	TC	TC	TC	CC	TC	CC	TC	TC	TT	CC	TC	TT	TC	TC	TC	TC	TC	TC	CC	TC	CC	TC	TT	CC	TC	TT	TT	TC	TC	TT	TC	CC	TT	TC	TC	CC	TC	TC	TC	TC	TC	TC	CC
contig53820_35	G	A	GG	AG	AG	AA	AG	AG	AG	GG	AG	GG	AG	AG	AA	GG	AG	AA	AG	AG	AG	AG	AG	AG	GG	AG	GG	AG	AA	GG	AG	AA	AA	AG	AG	AA	AG	GG	AA	AG	AG	GG	AG	AG	AG	AG	AG	AG	GG
contig224279_24	T	C	TT	CT	CT	CC	CT	CT	CT	TT	CT	TT	CT	CT	CC	TT	CT	CC	CT	CT	CT	CT	CT	CT	TT	CT	TT	CT	CC	TT	CT	CC	CC	CT	CT	CC	CT	TT	CC	CT	CT	TT	CT	CT	CT	CT	CT	CT	TT
contig8075_207	A	G	GA	AA	GA	AA	AA	GA	GA	GA	AA	GA	GA	GA	AA	GA	GA	AA	AA	AA	GA	AA	GA	GA	GA	GA	GA	GA	AA	GA	GA	AA	AA	AA	AA	AA	AA	GA	AA	GA	GA	GA	GA	GA	GA	GA	GA	GA	GA
contig215_27	C	T	CC	TC	TC	TT	TC	TC	TC	CC	TC	CC	TC	TC	TT	CC	TC	TT	TC	TC	TC	TC	TC	TC	CC	TC	CC	TC	TT	CC	TC	TT	TT	TC	TC	TT	TC	CC	TT	TC	TC	CC	TC	TC	TC	TC	TC	TC	CC
contig53820_67	T	C	TT	CT	CT	CC	CT	CT	CT	TT	CT	TT	CT	CT	CC	TT	CT	CC	CT	CT	CT	CT	CT	CT	TT	CT	TT	CT	CC	TT	CT	CC	CC	CT	CT	CC	CT	TT	CC	CT	CT	TT	CT	CT	CT	CT	CT	CT	TT
contig49433_137	A	T	AA	TA	TA	TT	TA	TA	TA	AA	TA	AA	TA	TA	TT	AA	TA	TT	TA	TA	TA	TA	TA	TA	AA	TA	AA	TA	TT	AA	TA	TT	TT	TA	TA	TT	TA	AA	TT	TA	TA	AA	TA	TA	TA	TA	TA	TA	AA
contig8075_203	A	G	GA	AA	GA	AA	AA	GA	GA	GA	AA	GA	GA	GA	AA	GA	GA	AA	AA	AA	GA	AA	GA	GA	GA	GA	GA	GA	AA	GA	GA	AA	AA	AA	AA	AA	AA	GA	AA	GA	GA	GA	GA	GA	AA	GA	GA	GA	GA
contig36899_16	A	G	AA	GA	GA	GG	GA	GA	GA	AA	GA	AA	GA	GA	GG	AA	GA	GG	GA	GA	GA	GA	GA	GA	AA	GA	AA	GA	GG	AA	GA	GG	GG	GA	GA	GG	GA	AA	GG	GA	GA	AA	GA	GA	GA	AA	AA	GA	AA
contig8075_143	G	T	TG	GG	TG	GG	GG	TG	TG	TG	GG	TG	TG	TG	GG	TG	TG	GG	GG	GG	TG	GG	TG	TG	TG	TG	TG	TG	GG	TG	TG	GG	GG	GG	GG	GG	GG	TG	GG	TG	TG	TG	TG	TG	GG	GG	TG	TG	TG
contig215_105	G	T	TG	TG	GG	GG	TG	GG	GG	TG	TG	TG	GG	GG	GG	TG	GG	GG	TG	TG	GG	TG	GG	GG	TG	GG	TG	GG	GG	TG	GG	GG	GG	TG	TG	GG	TG	TG	GG	GG	GG	TG	GG	GG	GG	GG	TG	GG	TG
contig8075_212	C	A	AC	CC	AC	CC	CC	AC	AC	AC	CC	AC	AC	AC	CC	AC	AC	CC	CC	CC	AC	CC	AC	AC	AC	AC	AC	AC	CC	AC	AC	CC	CC	CC	CC	CC	CC	AC	CC	AC	AC	AC	AC	AC	CC	CC	AC	AC	AC
contig8075_144	A	G	GA	AA	GA	AA	AA	GA	GA	GA	AA	GA	GA	GA	AA	GA	GA	AA	AA	AA	GA	AA	GA	GA	GA	GA	GA	GA	AA	GA	GA	AA	AA	AA	AA	AA	AA	GA	AA	GA	GA	GA	GA	GA	AA	AA	GA	GA	GA
contig8075_215	G	C	CG	GG	CG	GG	GG	CG	CG	CG	GG	CG	CG	CG	GG	CG	CG	GG	GG	GG	CG	GG	CG	CG	CG	CG	CG	CG	GG	CG	CG	GG	GG	GG	GG	GG	GG	CG	GG	CG	CG	CG	CG	CG	GG	GG	CG	CG	CG
contig8075_222	T	G	GT	TT	GT	TT	TT	GT	GT	GT	TT	GT	GT	GT	TT	GT	GT	TT	TT	TT	GT	TT	GT	GT	GT	GT	GT	GT	TT	GT	GT	TT	TT	TT	TT	TT	TT	GT	TT	GT	GT	GT	GT	GT	TT	TT	GT	GT	GT
contig8075_217	T	C	CT	TT	CT	TT	TT	CT	CT	CT	TT	CT	CT	CT	TT	CT	CT	TT	TT	TT	CT	TT	CT	CT	CT	CT	CT	CT	TT	CT	CT	TT	TT	TT	TT	TT	TT	CT	TT	CT	CT	CT	CT	CT	TT	TT	CT	CT	CT
contig8075_220	C	T	TC	CC	TC	CC	CC	TC	TC	TC	CC	TC	TC	TC	CC	TC	TC	CC	CC	CC	TC	CC	TC	TC	TC	TC	TC	TC	CC	TC	TC	CC	CC	CC	CC	CC	CC	TC	CC	TC	TC	TC	TC	TC	CC	CC	TC	TC	TC
contig501492_180	T	C	CT	CT	TT	TT	CT	TT	TT	CT	CT	CT	TT	TT	TT	CT	TT	TT	CT	CT	TT	CT	TT	TT	CT	TT	CT	TT	TT	CT	TT	TT	TT	CT	CT	TT	CT	CT	TT	TT	TT	CT	TT	TT	CT	CT	CT	TT	CT
contig286430_78	C	T	TC	TC	CC	CC	TC	CC	CC	TC	TC	TC	CC	CC	CC	TC	CC	CC	TC	TC	CC	TC	CC	CC	TC	CC	TC	CC	CC	TC	CC	CC	CC	TC	TC	CC	TC	TC	CC	CC	CC	TC	CC	CC	TC	TC	TC	CC	TC
contig8075_214	T	A	AT	TT	AT	TT	TT	AT	AT	AT	TT	AT	AT	AT	TT	AT	AT	TT	TT	TT	AT	TT	AT	AT	AT	AT	AT	AT	TT	AT	AT	TT	TT	TT	TT	TT	TT	AT	TT	AT	AT	AT	AT	AT	TT	TT	AT	AT	AT
contig50207_45	G	C	CG	CG	GG	GG	CG	GG	GG	CG	CG	CG	GG	GG	GG	CG	GG	GG	CG	CG	GG	CG	GG	GG	CG	GG	CG	GG	GG	CG	GG	GG	GG	CG	CG	GG	CG	CG	GG	GG	GG	CG	GG	GG	CG	CG	CG	GG	CG
contig840657_218	T	C	CT	CT	TT	TT	CT	TT	TT	CT	CT	CT	TT	TT	TT	CT	TT	TT	CT	CT	TT	CT	TT	TT	CT	TT	CT	TT	TT	CT	TT	TT	TT	CT	CT	TT	CT	CT	TT	TT	TT	CT	TT	TT	CT	CT	CT	TT	CT
contig511045_96	T	C	CT	CT	TT	TT	CT	TT	TT	CT	CT	CT	TT	TT	TT	CT	TT	TT	CT	CT	TT	CT	TT	TT	CT	TT	CT	TT	TT	CT	TT	TT	TT	CT	CT	TT	CT	CT	TT	TT	TT	CT	TT	TT	CT	CT	CT	TT	CT
contig511045_139	A	G	GA	GA	AA	AA	GA	AA	AA	GA	GA	GA	AA	AA	AA	GA	AA	AA	GA	GA	AA	GA	AA	AA	GA	AA	GA	AA	AA	GA	AA	AA	AA	GA	GA	AA	GA	GA	AA	AA	AA	GA	AA	AA	GA	GA	GA	AA	GA
contig50207_158	G	C	CG	CG	GG	GG	CG	GG	GG	CG	CG	CG	GG	GG	GG	CG	GG	GG	CG	CG	GG	CG	GG	GG	CG	GG	CG	GG	GG	CG	GG	GG	GG	CG	CG	GG	CG	CG	GG	GG	GG	CG	GG	GG	CG	CG	CG	GG	CG
contig41542_41	G	A	AG	AG	GG	GG	AG	GG	GG	AG	AG	AG	GG	GG	GG	AG	GG	GG	AG	AG	GG	AG	GG	GG	AG	GG	AG	GG	GG	AG	GG	GG	GG	AG	AG	GG	AG	AG	GG	GG	GG	AG	GG	GG	AG	AG	AG	GG	AG
contig15532_168	C	T	TC	TC	CC	CC	TC	CC	CC	TC	TC	TC	CC	CC	CC	TC	CC	CC	TC	TC	CC	TC	CC	CC	TC	CC	TC	CC	CC	TC	CC	CC	CC	TC	TC	CC	TC	TC	CC	CC	CC	TC	CC	CC	TC	TC	TC	CC	TC
contig41542_92	C	A	CC	AC	AC	AA	AC	AC	AC	CC	AC	CC	AC	AA	AA	CC	AC	AA	AC	AC	AC	AC	AC	AC	CC	AC	CC	AC	AA	CC	AC	AA	AA	AC	AC	AA	AC	CC	AA	AC	AC	CC	AC	AC	AC	AC	CC	AC	CC
contig41542_58	T	C	CT	CT	TT	TT	CT	TT	TT	CT	CT	CT	TT	TT	TT	CT	TT	TT	CT	CT	TT	CT	TT	TT	CT	TT	CT	TT	TT	CT	TT	TT	TT	CT	CT	TT	CT	CT	TT	TT	TT	CT	TT	TT	CT	CT	CT	TT	CT
contig41542_199	C	T	TC	TC	CC	CC	TC	CC	CC	TC	TC	TC	CC	CC	CC	TC	CC	CC	TC	TC	CC	TC	CC	CC	TC	CC	TC	CC	CC	TC	CC	CC	CC	TC	TC	CC	TC	TC	CC	CC	CC	TC	CC	CC	TC	TC	TC	CC	TC
contig23073_32	T	C	CC	CT	CT	TT	CT	CT	CT	CC	CT	CC	CT	TT	TT	CC	CT	TT	CT	CT	CT	CT	CT	CT	CC	CT	CC	CT	TT	CC	CT	TT	TT	CT	CT	TT	CT	CC	TT	CT	CT	CC	CT	CT	CT	CT	CT	CT	CC
contig840657_176	A	C	CA	CA	AA	AA	CA	AA	AA	CA	CA	CA	AA	AA	AA	CA	AA	AA	CA	CA	AA	CA	AA	AA	CA	AA	CA	AA	AA	CA	AA	AA	AA	CA	CA	AA	CA	CA	AA	AA	AA	CA	AA	AA	CA	CA	CA	AA	CA
contig35942_34	G	C	CG	CG	GG	GG	CG	GG	GG	CG	CG	CG	GG	GG	GG	CG	GG	GG	CG	CG	GG	CG	GG	GG	CG	GG	CG	GG	GG	CG	GG	GG	GG	CG	CG	GG	CG	CG	GG	GG	GG	CG	GG	GG	CG	CG	CG	GG	CG
contig36899_100	T	C	CT	CT	TT	TT	CT	TT	TT	CT	CT	CT	TT	TT	TT	CT	TT	TT	CT	CT	TT	CT	TT	TT	CT	TT	CT	TT	TT	CT	TT	TT	TT	CT	CT	TT	CT	CT	TT	TT	TT	CT	TT	TT	CT	CT	CT	TT	CT
contig50207_230	G	A	AG	AG	GG	GG	AG	GG	GG	AG	AG	AG	GG	GG	GG	AG	GG	GG	AG	AG	GG	AG	GG	GG	AG	GG	AG	GG	GG	AG	GG	GG	GG	AG	AG	GG	AG	AG	GG	GG	GG	AG	GG	GG	AG	AG	AG	GG	AG
contig50207_181	G	A	AG	AG	GG	GG	AG	GG	GG	AG	AG	AG	GG	GG	GG	AG	GG	GG	AG	AG	GG	AG	GG	GG	AG	GG	AG	GG	GG	AG	GG	GG	GG	AG	AG	GG	AG	AG	GG	GG	GG	AG	GG	GG	AG	AG	AG	GG	AG
contig41542_124	A	T	AA	TA	TA	TT	TA	TA	TA	AA	TA	AA	TA	TT	TT	AA	TA	TT	TA	TA	TA	TA	TA	TA	AA	TA	AA	TA	TT	AA	TA	TT	TT	TA	TA	TT	TA	AA	TT	TA	TA	AA	TA	TA	AA	AA	AA	TA	AA
contig35942_33	A	T	TA	TA	AA	AA	TA	AA	AA	TA	TA	TA	AA	AA	AA	TA	AA	AA	TA	TA	AA	TA	AA	AA	TA	AA	TA	AA	AA	TA	AA	AA	AA	TA	TA	AA	TA	TA	AA	AA	AA	TA	AA	AA	TA	TA	TA	AA	TA
contig840657_164	A	T	TA	TA	AA	AA	TA	AA	AA	TA	TA	TA	AA	AA	AA	TA	AA	AA	TA	TA	AA	TA	AA	AA	TA	AA	TA	AA	AA	TA	AA	AA	AA	TA	TA	AA	TA	TA	AA	AA	AA	TA	AA	AA	TA	TA	TA	AA	TA
contig35942_115	A	G	GA	GA	AA	AA	GA	AA	AA	GA	GA	GA	AA	AA	AA	GA	AA	AA	GA	GA	AA	GA	AA	AA	GA	AA	GA	AA	AA	GA	AA	AA	AA	GA	GA	AA	GA	GA	AA	AA	AA	GA	AA	AA	GA	GA	GA	AA	GA
contig53820_108	G	A	AG	AG	GG	GG	AG	GG	GG	AG	AG	AG	GG	GG	GG	AG	GG	GG	AG	AG	GG	AG	GG	GG	AG	GG	AG	GG	GG	AG	GG	GG	GG	AG	AG	GG	AG	AG	GG	GG	GG	AG	GG	GG	AG	AG	AG	GG	AG
contig701481_66	T	A	TT	AT	AT	AA	AT	AT	AT	TT	AT	TT	AT	AA	AA	TT	AT	AA	AT	AT	AT	AT	AT	AT	TT	AT	TT	AT	AA	TT	AT	AA	AA	AT	AT	AA	AT	TT	AA	AT	AT	TT	AT	AT	AT	AT	AT	AT	TT
contig840657_183	A	G	GA	GA	AA	AA	GA	AA	AA	GA	GA	GA	AA	AA	AA	GA	AA	AA	GA	GA	AA	GA	AA	AA	GA	AA	GA	AA	AA	GA	AA	AA	AA	GA	GA	AA	GA	GA	AA	AA	AA	GA	AA	AA	AA	AA	AA	AA	GA
contig15532_138	C	T	CC	TC	TC	TT	TC	TC	TC	CC	TC	CC	TC	TT	TT	CC	TC	TT	TC	TC	TC	TC	TC	TC	CC	TC	CC	TC	TT	CC	TC	TT	TT	TC	TC	TT	TC	CC	TT	TC	TC	CC	TC	TC	TC	TC	TC	TC	CC
contig447852_155	A	G	AA	GA	GA	GG	GA	GA	GA	AA	GA	AA	GA	GG	GG	AA	GA	GG	GA	GA	GA	GA	GA	GA	AA	GA	AA	GA	GG	AA	GA	GG	GG	GA	GA	GG	GA	AA	GG	GA	GA	AA	GA	GA	GA	GA	GA	GA	AA
contig447852_106	A	C	AA	CA	CA	CC	CA	CA	CA	AA	CA	AA	CA	CC	CC	AA	CA	CC	CA	CA	CA	CA	CA	CA	AA	CA	AA	CA	CC	AA	CA	CC	CC	CA	CA	CC	CA	AA	CC	CA	CA	AA	CA	CA	CA	CA	CA	CA	AA
contig15532_166	C	A	AC	CC	AC	CC	CC	AC	AC	AC	CC	AC	AC	CC	CC	AC	AC	CC	CC	CC	AC	CC	AC	AC	AC	AC	AC	AC	CC	AC	AC	CC	CC	CC	CC	CC	CC	AC	CC	AC	AC	AC	AC	AC	AC	AC	AC	AC	AC
contig59445_238	T	G	TT	GT	GT	GG	GT	GT	GT	TT	GT	TT	GT	GG	GG	TT	GT	GG	GT	GT	GT	GT	GT	GT	TT	GT	TT	GT	GG	TT	GT	GG	GG	GT	GT	GG	GT	TT	GG	GT	GT	TT	GT	GT	GT	GT	GT	GT	TT
contig35942_81	A	G	GA	AA	GA	AA	AA	GA	GA	GA	AA	GA	GA	AA	AA	GA	GA	AA	AA	AA	GA	AA	GA	GA	GA	GA	GA	GA	AA	GA	GA	AA	AA	AA	AA	AA	AA	GA	AA	GA	GA	GA	GA	GA	GA	GA	GA	GA	GA
contig18085_98	G	A	GG	AG	AG	AA	AG	AG	AG	GG	AG	GG	AG	AA	AA	GG	AG	AA	AG	AG	AG	AG	AG	AG	GG	AG	GG	AG	AA	GG	AG	AA	AA	AG	AG	AA	AG	GG	AA	AG	AG	GG	AG	AG	AG	AG	AG	AG	GG
contig35942_17	T	C	CT	TT	CT	TT	TT	CT	CT	CT	TT	CT	CT	TT	TT	CT	CT	TT	TT	TT	CT	TT	CT	CT	CT	CT	CT	CT	TT	CT	CT	TT	TT	TT	TT	TT	TT	CT	TT	CT	CT	CT	CT	CT	CT	CT	CT	CT	CT
contig563900_51	G	A	GG	AG	AG	AA	AG	AG	AG	GG	AA	GG	AG	AA	AA	GG	AG	AA	AG	AG	AG	AG	AG	AG	GG	AG	GG	AG	AA	GG	AG	AA	AA	AG	AA	AA	AG	GG	AA	AG	AG	GG	AG	AG	AG	AG	AG	AG	GG
contig641679_111	G	C	CG	GG	CG	GG	GG	CG	CG	CG	GG	CG	CG	GG	GG	CG	CG	GG	GG	GG	CG	GG	CG	CG	CG	CG	CG	CG	GG	CG	CG	GG	GG	GG	GG	GG	GG	CG	GG	CG	CG	CG	CG	CG	CG	CG	CG	CG	CG
contig563900_80	T	C	CT	TT	CT	TT	TT	CT	CT	CT	TT	CT	CT	TT	TT	CT	CT	TT	TT	TT	CT	TT	CT	CT	CT	CT	CT	CT	TT	CT	CT	TT	TT	TT	TT	TT	TT	CT	TT	CT	CT	CT	CT	CT	CT	CT	CT	CT	CT
contig501492_195	G	A	AG	GG	AG	GG	GG	AG	AG	AG	GG	AG	AG	GG	GG	AG	AG	GG	GG	GG	AG	GG	AG	AG	AG	AG	AG	AG	GG	AG	AG	GG	GG	GG	GG	GG	GG	AG	GG	AG	AG	AG	AG	AG	AG	AG	AG	AG	AG
contig20070_30	C	G	GG	GC	GC	CC	GC	GC	GC	GG	GC	GG	GC	CC	CC	GG	GC	CC	GC	GC	GC	GC	GC	GC	GG	GC	GG	GC	CC	GG	GC	CC	CC	GC	GC	CC	GC	GG	CC	GC	GC	GG	GC	GC	CC	CC	CC	GC	GG
contig840657_59	T	C	CT	TT	CT	TT	TT	CT	CT	CT	TT	CT	CT	TT	TT	CT	CT	TT	TT	TT	CT	TT	CT	CT	CT	CT	CT	CT	TT	CT	CT	TT	TT	TT	TT	TT	TT	CT	TT	CT	CT	CT	CT	CT	TT	TT	TT	CT	CT
contig20070_16	C	T	TC	CC	TC	CC	CC	TC	TC	TC	CC	TC	TC	CC	CC	TC	TC	CC	CC	CC	TC	CC	TC	TC	TC	TC	TC	TC	CC	TC	TC	CC	CC	CC	CC	CC	CC	TC	CC	TC	TC	TC	TC	TC	CC	CC	CC	TC	TC
contig641679_119	T	G	TT	GT	GT	GG	GG	GT	GT	TT	GT	TT	GT	GG	GG	TT	GT	GG	GT	GG	GT	GT	GT	GT	TT	GT	TT	GT	GG	TT	GT	GG	GG	GT	GT	GG	GT	TT	GG	GT	GT	TT	GT	GT	TT	TT	TT	GT	TT
contig38710_66	C	G	GC	CC	GC	CC	CC	GC	GC	GC	CC	GC	GC	CC	CC	GC	GC	CC	CC	CC	GC	CC	GC	GC	GC	GC	GC	GC	CC	GC	GC	CC	CC	CC	CC	CC	CC	GC	CC	GC	GC	GC	GC	GC	CC	CC	CC	GC	GC
contig641679_102	A	G	AA	GA	GA	GG	GG	GA	GA	AA	GA	AA	GA	GG	GG	AA	GA	GG	GA	GG	GA	GA	GA	GA	AA	GA	AA	GA	GG	AA	GA	GG	GG	GA	GA	GG	GA	AA	GG	GA	GA	AA	GA	GA	AA	AA	AA	GA	AA
contig641679_142	T	C	TT	CT	CT	CC	CC	CT	CT	TT	CT	TT	CT	CC	CC	TT	CT	CC	CT	CC	CT	CT	CT	CT	TT	CT	TT	CT	CC	TT	CT	CC	CC	CT	CT	CC	CT	TT	CC	CT	CT	TT	CT	CT	TT	TT	TT	CT	TT
contig38710_109	C	A	CC	AC	AC	AA	AC	AC	AC	CC	AC	CC	AC	AA	AA	CC	AC	AA	AC	AC	AC	AC	AC	AC	CC	AC	CC	AC	AA	CC	AC	AA	AA	AC	AC	AA	AC	CC	AA	AC	AC	CC	AC	AC	CC	AC	CC	AC	CC
contig563900_66	T	A	AT	TT	AT	TT	TT	AT	AT	AT	TT	AT	AT	TT	TT	AT	AT	TT	TT	TT	AT	TT	AT	AT	AT	AT	AT	AT	TT	AT	AT	TT	TT	TT	TT	TT	TT	AT	TT	AT	AT	AT	AT	AT	TT	AT	TT	AT	AT
contig641679_88	C	T	CC	TC	TC	TT	TT	TC	TC	CC	TC	CC	TC	TT	TT	CC	TC	TT	TC	TT	TC	TC	TC	TC	CC	TC	CC	TC	TT	CC	TC	TT	TT	TC	TC	TT	TC	CC	TT	TC	TC	CC	TC	TC	CC	TC	CC	TC	CC
contig13520_180	A	G	GA	AA	GA	AA	AA	GA	GA	GA	AA	GA	GA	AA	AA	GA	GA	AA	AA	AA	GA	AA	GA	GA	GA	GA	GA	GA	AA	GA	GA	AA	AA	AA	AA	AA	AA	GA	AA	GA	GA	GA	GA	GA	AA	GA	AA	GA	GA
contig470338_157	C	G	CC	GC	GC	GG	GC	GC	GC	CC	GC	CC	GC	GG	GG	CC	GC	GG	GC	GC	GC	GC	GC	GC	CC	GC	CC	GC	GG	CC	GC	GG	GG	GC	GC	GG	GC	CC	GG	GC	GC	CC	GC	GC	CC	GC	CC	GC	CC
contig17756_187	A	C	AA	CA	CA	CC	CA	CA	CA	AA	CA	AA	CA	CC	CC	AA	CA	CC	CA	CA	CA	CA	CA	CA	AA	CA	AA	CA	CC	AA	CA	CC	CC	CA	CA	CC	CA	AA	CC	CA	CA	AA	CA	CA	CA	CA	CA	CA	AA
contig470338_169	C	G	CC	GC	GC	GG	GC	GC	GC	CC	GC	CC	GC	GG	GG	CC	GC	GG	GC	GG	GC	GC	GC	GC	CC	GC	CC	GC	GG	CC	GC	GG	GG	GC	GC	GG	GG	CC	GG	GC	GC	CC	GC	GC	GC	GC	GC	GC	CC
contig22060_2	G	A	AG	GG	AG	GG	GG	AG	AG	AG	GG	AG	AG	GG	GG	AG	AG	GG	GG	GG	AG	GG	AG	AG	AG	AG	AG	AG	GG	AG	AG	GG	GG	GG	GG	GG	GG	AG	GG	AG	AG	AG	AG	AG	AG	AG	AG	AG	AG
contig22060_59	G	A	AG	GG	AG	GG	GG	AG	AG	AG	GG	AG	AG	GG	GG	AG	AG	GG	GG	GG	AG	GG	AG	AG	AG	AG	AG	AG	GG	AG	AG	GG	GG	GG	GG	GG	GG	AG	GG	AG	AG	AG	AG	AG	AG	GG	AG	AG	AG
contig17756_46	A	G	AA	GA	GA	GG	GA	GA	GA	AA	GA	AA	GA	GG	GG	AA	GA	GG	GA	GA	GA	GA	GA	GA	AA	GA	AA	GA	GG	AA	GA	GG	GG	GA	GA	GG	GG	AA	GG	GA	GA	AA	GA	GA	GA	GA	GA	GA	AA
contig211828_80	A	G	AA	GA	GA	GG	GA	GA	GA	AA	GA	AA	GA	GG	GG	AA	GA	GG	GA	GA	GA	GA	GA	GA	AA	GA	AA	GA	GG	AA	GA	GG	GG	GA	GA	GG	GA	AA	GG	GA	GA	AA	GA	GA	GA	GA	GA	GA	AA
contig470338_136	G	A	AG	GG	AG	GG	GG	AG	AG	AG	GG	AG	AG	GG	GG	AG	AG	GG	GG	GG	AG	GG	AG	AG	AG	AG	AG	AG	GG	AG	AG	GG	GG	GG	GG	GG	GG	AG	GG	AG	AG	AG	AG	AG	AG	GG	AG	AG	AG
contig470338_170	A	G	AA	GA	GA	GG	GG	GA	GA	AA	GA	AA	GA	GG	GG	AA	GA	GG	GG	GG	GA	GA	GA	GA	AA	GA	AA	GA	GG	AA	GA	GG	GG	GA	GA	GG	GG	AA	GG	GA	GA	AA	GA	GA	GA	GA	GA	GA	AA
contig17756_202	T	G	GT	TT	GT	TT	TT	GT	GT	GT	TT	GT	GT	TT	TT	GT	GT	TT	TT	TT	GT	TT	GT	GT	GT	GT	GT	GT	TT	GT	GT	TT	TT	TT	TT	TT	TT	GT	TT	GT	GT	GT	GT	GT	GT	TT	GT	GT	GT
contig22060_92	C	T	CC	TC	TC	TT	TC	TC	TC	CC	TC	CC	TC	TT	TT	CC	TC	TT	TC	TC	TC	TC	TC	TC	CC	TC	CC	TC	TT	CC	TC	TT	TT	TC	TC	TT	TC	CC	TT	TC	TC	CC	TC	TC	TC	TC	TC	TC	CC
contig17756_180	T	C	CT	TT	CT	TT	TT	CT	CT	CT	TT	CT	CT	TT	TT	CT	CT	TT	TT	TT	CT	TT	CT	CT	CT	CT	CT	CT	TT	CT	CT	TT	TT	TT	TT	TT	TT	CT	TT	CT	CT	CT	CT	CT	CT	TT	CT	CT	CT
contig13520_149	G	A	AG	GG	AG	GG	GG	AG	AG	AG	GG	AG	AG	GG	GG	AG	AG	GG	GG	GG	AG	GG	AG	AG	AG	AG	AG	AG	GG	AG	AG	GG	GG	GG	GG	GG	GG	AG	GG	AG	AG	AG	AG	AG	GG	GG	GG	AG	AG
contig17756_124	T	C	CT	TT	CT	TT	TT	CT	CT	CT	TT	CT	CT	TT	TT	CT	CT	TT	TT	TT	CT	TT	CT	CT	CT	CT	CT	CT	TT	CT	CT	TT	TT	TT	TT	TT	TT	CT	TT	CT	CT	CT	CT	CT	TT	TT	TT	CT	CT
contig22060_72	C	T	CC	TC	TC	TT	TC	TC	TC	CC	TC	CC	TC	TT	TT	CC	TC	TT	TC	TC	TC	TC	TC	TC	CC	TC	CC	TC	TT	CC	TC	TT	TT	TC	TC	TT	TC	CC	TT	TC	TC	CC	TC	TC	TC	TT	TC	CC	CC
contig14787_157	T	A	AT	TT	AT	TT	TT	AT	AT	AT	TT	AT	AT	TT	TT	AT	AT	TT	TT	TT	AT	TT	AT	AT	AT	AT	AT	AT	TT	AT	AT	TT	TT	TT	TT	TT	TT	AT	TT	AT	AT	AT	AT	AT	AT	TT	AT	AT	AT
contig14787_176	A	G	AA	GA	GA	GG	GA	GA	GA	AA	GA	AA	GA	GG	GG	AA	GA	GG	GA	GA	GA	GA	GA	GA	AA	GA	AA	GA	GG	AA	GA	GG	GG	GA	GA	GG	GA	AA	GG	GA	GA	AA	GA	GA	GA	GA	GA	GA	AA
contig470338_25	A	C	CA	AA	CA	AA	AA	CA	CA	CA	AA	CA	CA	AA	AA	CA	CA	AA	AA	AA	CA	AA	CA	CA	CA	CA	CA	CA	AA	CA	CA	AA	AA	AA	AA	AA	AA	CA	AA	CA	CA	CA	CA	CA	CA	CA	CA	CA	CA
contig13520_141	A	G	GA	AA	GA	AA	AA	GA	GA	GA	AA	GA	GA	AA	AA	GA	GA	AA	AA	AA	GA	AA	GA	GA	GA	GA	GA	GA	AA	GA	GA	AA	AA	AA	AA	AA	AA	GA	AA	GA	GA	GA	GA	GA	GA	GA	GA	GA	GA
contig4550_23	C	T	TT	TC	TC	CC	TC	TC	TC	TT	TC	TT	TC	CC	CC	TT	TC	CC	TC	TC	TC	TC	TC	TC	TT	TC	TT	TC	CC	TT	TC	CC	CC	TC	TC	CC	TC	TT	CC	TC	TC	TT	TC	TC	TC	TC	TC	TC	TT
contig14787_139	A	C	AA	CA	CA	CC	CA	CA	CA	AA	CA	AA	CA	CC	CC	AA	CA	CC	CA	CA	CA	CA	CA	CA	AA	CA	AA	CA	CC	AA	CA	CC	CC	CA	CA	CC	CA	AA	CC	CA	CA	AA	CA	CA	CA	AA	CA	CA	AA
contig17756_203	A	G	GA	GA	AA	AA	GA	AA	AA	GA	GA	GA	AA	AA	AA	GA	AA	AA	GA	GA	AA	GA	AA	AA	GA	AA	GA	AA	AA	GA	AA	AA	AA	GA	GA	AA	GG	GA	AA	AA	AA	GA	AA	AA	GG	GA	GG	AA	GA
contig79196_46	T	C	TT	CT	CT	CC	CT	CT	CT	TT	CT	TT	CT	CC	CC	TT	CT	CC	CT	CT	CT	CT	CT	CT	TT	CT	TT	CT	CC	TT	CT	CC	CC	CT	CT	CC	CT	TT	CC	CT	CT	TT	CT	CT	CT	TT	CT	CT	TT
contig79196_148	T	C	TT	CT	CT	CC	CT	CT	CT	TT	CT	TT	CT	CC	CC	TT	CT	CC	CT	CT	CT	CT	CT	CT	TT	CT	TT	CT	CC	TT	CT	CC	CC	CT	CT	CC	CT	TT	CC	CT	CT	TT	CT	CT	CT	TT	CT	CT	TT
contig17756_73	G	A	AG	AG	GG	GG	AG	GG	GG	AG	AG	AG	GG	GG	GG	AG	GG	GG	AG	AG	GG	AG	GG	GG	AG	GG	AG	GG	GG	AG	GG	GG	GG	AG	AG	GG	AA	AG	GG	GG	GG	AG	GG	GG	AA	AG	AA	GG	AG
contig79196_57	G	C	GG	CG	CG	CC	CG	CG	CG	GG	CG	GG	CG	CC	CC	GG	CG	CC	CG	CG	CG	CG	CG	CG	GG	CG	GG	CG	CC	GG	CG	CC	CC	CG	CG	CC	CG	GG	CC	CG	CG	GG	CG	CG	GG	GG	GG	CG	GG
contig470338_106	A	G	GA	GA	AA	AA	GA	AA	AA	GA	GA	GA	AA	AA	AA	GA	AA	AA	GA	GA	AA	GA	AA	AA	GA	AA	GA	AA	AA	GA	AA	AA	AA	GA	GA	AA	GA	GA	AA	AA	AA	GA	AA	AA	GA	GA	GA	AA	GA
contig4064_129	A	G	GA	GA	AA	AA	GA	AA	AA	GA	GA	GA	AA	AA	AA	GA	AA	AA	GA	GA	AA	GA	AA	AA	GA	AA	GA	AA	AA	GA	AA	AA	AA	GA	GA	AA	GA	GA	AA	AA	GA	GA	AA	AA	GA	GA	GA	AA	GA
contig522050_87	G	A	GG	AG	AG	AA	AG	AG	AG	GG	AG	GG	AG	AA	AA	GG	AG	AA	AG	AG	AG	AG	AG	AG	GG	AG	GG	AG	AA	GG	AG	AA	AA	GG	AG	AA	AG	GG	AA	AG	AG	GG	AG	AG	GG	GG	GG	AG	GG
contig49293_233	T	C	CT	CT	TT	TT	CT	TT	TT	CT	CT	CT	TT	TT	TT	CT	TT	TT	CT	CT	TT	CT	TT	TT	CT	TT	CT	TT	TT	CT	TT	TT	TT	CT	CT	TT	CT	CT	TT	TT	TT	CT	TT	TT	CT	CT	CT	TT	CT
contig17756_157	T	C	CT	CT	TT	TT	CT	TT	TT	CT	CT	CT	TT	TT	TT	CT	TT	TT	CT	CT	TT	CT	TT	TT	CT	TT	CT	TT	TT	CT	TT	TT	TT	CT	CT	TT	CC	CT	TT	TT	TT	CT	TT	TT	CT	CT	CT	TT	CT
contig49293_216	G	A	GG	AG	AG	AA	AG	AG	AG	GG	AG	GG	AG	AA	AA	GG	AG	AA	AG	AG	AG	AG	AG	AG	GG	AG	GG	AG	AA	GG	AG	AA	AA	AG	AG	AA	AG	GG	AA	AG	AA	GG	AG	AG	GG	GG	GG	AG	GG
contig43029_112	G	T	TG	TG	GG	GG	TG	GG	GG	TG	TG	TG	GG	GG	GG	TG	GG	GG	TG	TG	GG	TG	GG	GG	TG	GG	TG	GG	GG	TG	GG	GG	GG	TG	TG	GG	TG	TG	GG	GG	GG	TG	GG	GG	TG	TG	TG	GG	TG
contig79196_170	T	C	CT	TT	CT	TT	TT	CT	CT	CT	TT	CT	CT	TT	TT	CT	CT	TT	TT	TT	CT	TT	CT	CT	CT	CT	CT	CT	TT	CT	CT	TT	TT	TT	TT	TT	TT	CT	TT	CT	CT	CT	CT	CT	TT	TT	TT	CT	CT
contig4064_178	T	C	CT	CT	TT	TT	CT	TT	TT	CT	CT	CT	TT	TT	TT	CT	TT	TT	CT	CT	TT	CT	TT	TT	CT	TT	CT	TT	TT	CT	TT	TT	TT	CT	CT	TT	CT	CT	TT	TT	TT	CT	TT	TT	CT	CT	CT	TT	CT
contig49293_85	G	A	AG	AG	GG	GG	AG	GG	GG	AG	AG	AG	GG	GG	GG	AG	GG	GG	AG	AG	GG	AG	GG	GG	AG	GG	AG	GG	GG	AG	GG	GG	GG	AG	AG	GG	AG	AG	GG	GG	GG	AG	GG	GG	AG	AG	AG	GG	AG
contig470338_134	T	G	GT	GT	TT	TT	GT	TT	TT	GT	GT	GT	TT	TT	TT	GT	TT	TT	GT	GT	TT	GT	TT	TT	GT	TT	GT	TT	TT	GT	TT	TT	TT	GT	GT	TT	GT	GT	TT	TT	TT	GT	TT	TT	GT	GT	GT	TT	GT
contig13520_166	C	T	TC	TC	CC	CC	TC	CC	CC	TC	TC	TC	CC	CC	CC	TC	CC	CC	TC	TC	CC	TC	CC	CC	TC	CC	TC	CC	CC	TC	CC	CC	CC	TC	TC	CC	TC	TC	CC	CC	CC	TC	CC	CC	TC	TC	TC	CC	TC
contig17756_179	A	C	CA	CA	AA	AA	CA	AA	AA	CA	CA	CA	AA	CA	AA	CA	AA	AA	CA	CA	AA	CA	AA	AA	CA	AA	CA	AA	AA	CA	AA	AA	AA	CA	CA	CA	CC	CA	AA	AA	AA	CA	AA	AA	CC	CA	CC	AA	CA
contig13520_64	T	A	AT	AT	TT	TT	AT	TT	TT	AT	AT	AT	TT	TT	TT	AT	TT	TT	AT	AT	TT	AT	TT	TT	AT	TT	AT	TT	TT	AT	TT	TT	TT	AT	AT	TT	AT	AT	TT	TT	TT	AT	TT	TT	AT	AT	AT	TT	AT
contig17756_175	T	G	GT	GT	TT	TT	GT	TT	TT	GT	GT	GT	TT	TT	TT	GT	TT	TT	GT	GT	TT	GT	TT	TT	GT	TT	GT	TT	TT	GT	TT	TT	TT	GT	GT	TT	GG	GT	TT	TT	TT	GT	TT	TT	TT	GT	TT	TT	GT
contig470338_92	A	G	GA	GA	AA	AA	GA	AA	AA	GA	GA	GA	AA	AA	AA	GA	AA	AA	GA	GA	AA	GA	AA	AA	GA	AA	GA	AA	AA	GA	AA	AA	AA	GA	GA	AA	GA	GA	AA	AA	AA	GA	AA	AA	AA	GA	AA	AA	GA
contig20070_104	G	C	CG	CG	GG	GG	CG	GG	GG	CG	CG	CG	GG	GG	GG	CG	GG	GG	CG	CG	GG	CG	GG	GG	CG	GG	CG	GG	GG	CG	GG	GG	GG	CG	CG	GG	CG	CG	GG	GG	GG	CG	GG	GG	GG	CG	GG	GG	CG
contig470338_125	T	C	CT	CT	TT	TT	CT	TT	TT	CT	CT	CT	TT	TT	TT	CT	TT	TT	CT	CT	TT	CT	TT	TT	CT	TT	CT	TT	TT	CT	TT	TT	TT	CT	CT	TT	CT	CT	TT	TT	TT	CT	TT	TT	TT	CT	TT	TT	CT
contig79196_191	T	G	GT	TT	GT	TT	TT	GT	GT	GT	TT	GT	GT	TT	TT	GT	GT	TT	TT	TT	GT	TT	GT	GT	GT	GT	GT	GT	TT	GT	GT	TT	TT	TT	TT	TT	TT	GT	TT	GT	GT	GT	GT	GT	TT	TT	TT	GT	GT
contig49293_4	A	G	AA	GA	GA	GG	GA	GA	GA	AA	GA	AA	GA	GG	GG	AA	GA	GG	GA	GA	GA	GA	GA	GA	AA	GA	AA	GA	GG	AA	GA	GG	GG	GA	GA	GG	GA	AA	GG	GA	GA	AA	GA	GA	AA	AA	AA	GA	AA
contig79196_68	A	T	AA	TA	TA	TT	TA	TA	TA	AA	TA	AA	TA	TT	TT	AA	TA	TT	TA	TA	TA	TA	TA	TA	AA	TA	AA	TA	TT	AA	TA	TT	TT	TA	TA	TT	TA	AA	TT	TA	TA	AA	TA	TA	AA	AA	AA	TA	AA
contig522050_86	A	G	AA	GA	GA	GG	GA	GA	GA	AA	GA	AA	GA	GG	GG	AA	GA	GG	GA	GA	GA	GA	GA	GA	AA	GA	AA	GA	GG	AA	GA	GG	GG	GA	GA	GG	GA	AA	GG	GA	GA	AA	GA	GA	AA	AA	AA	GA	AA
contig49293_219	G	T	GG	TG	TG	TT	TG	TG	TG	GG	TG	GG	TG	TT	TT	GG	TG	TT	TG	TG	TG	TG	TG	TG	GG	TG	GG	TG	TT	GG	TG	TT	TT	TG	TG	TT	TG	GG	TT	TG	TG	GG	TG	TG	GG	GG	GG	TG	GG
contig740267_15	T	A	AT	TT	TT	TT	AT	TT	TT	AT	AT	AT	TT	TT	TT	AT	TT	TT	AT	AT	TT	AT	TT	TT	AT	TT	AT	TT	TT	AT	TT	TT	TT	AT	AT	TT	AT	AT	TT	TT	TT	AT	TT	TT	TT	AT	AT	TT	AT
contig42237_189	G	A	GG	AG	AG	AA	AG	AG	AG	GG	AG	GG	AG	AA	AA	GG	AG	AA	AG	AG	AG	AG	AG	AG	GG	AG	GG	AG	AA	GG	AG	AA	AA	AG	AG	AA	AG	GG	AA	AG	AG	GG	AG	AG	AG	GG	GG	AG	GG
contig42237_132	C	T	TC	CC	TC	CC	CC	TC	TC	TC	CC	TC	TC	CC	CC	TC	TC	CC	CC	CC	TC	CC	TC	TC	TC	TC	TC	TC	CC	TC	TC	CC	CC	CC	CC	CC	CC	TC	CC	TC	TC	TC	TC	TC	TC	TC	TC	TC	TC
contig10923_4	G	T	TG	GG	TG	GG	GG	TG	TG	TG	GG	TG	TG	GG	GG	TG	TG	GG	GG	GG	TG	GG	TG	TG	TG	TG	TG	TG	GG	TG	TG	GG	GG	GG	GG	GG	GG	TG	GG	TG	TG	TG	TG	TG	TG	TG	TG	TG	TG
contig21634_152	G	A	AG	GG	AG	GG	GG	AG	AG	AG	GG	AG	AG	GG	GG	AG	AG	GG	GG	GG	AG	GG	AG	AG	AG	AG	AG	AG	GG	AG	AG	GG	GG	GG	GG	GG	GG	AG	GG	AG	AG	AG	AG	AG	AG	AG	AG	AG	AG
contig782027_87	C	T	TC	CC	TC	CC	CC	TC	TC	TC	CC	TC	TC	CC	CC	TC	TC	CC	CC	CC	TC	CC	TC	TC	TC	TC	TC	TC	CC	TC	TC	CC	CC	CC	CC	CC	CC	TC	CC	TC	TC	TC	TC	TC	TC	TC	TC	TC	TC
contig522764_130	T	C	TT	CT	CT	CC	CT	CT	CT	TT	CT	TT	CT	CC	CC	TT	CT	CC	CT	CT	CT	CT	CT	CT	TT	CT	TT	CT	CC	TT	CT	CC	CC	CT	CT	CC	CT	TT	CC	CT	CT	TT	CT	CT	CT	TT	CT	CT	TT
contig79196_185	G	C	CG	GG	CG	GG	GG	CG	CG	CG	GG	CG	CG	GG	GG	CG	CG	GG	GG	GG	CG	GG	CG	CG	CG	CG	CG	CG	GG	CG	CG	GG	GG	GG	GG	GG	GG	CG	GG	CG	CG	CG	CG	CG	CG	CG	CG	CG	CG
contig42237_209	C	T	TC	CC	TC	CC	CC	TC	TC	TC	CC	TC	TC	CC	CC	TC	TC	CC	CC	CC	TC	CC	TC	TC	TC	TC	TC	TC	CC	TC	TC	CC	CC	CC	CC	CC	CC	TC	CC	TC	TC	TC	TC	TC	TC	TC	TC	TC	TC
contig841515_93	A	T	TA	TA	AA	AA	TA	AA	AA	TA	TA	TA	AA	AA	AA	TA	AA	AA	TA	TA	AA	TA	AA	AA	TA	AA	TA	AA	AA	TA	AA	AA	AA	TA	TA	AA	TA	TA	AA	AA	AA	TA	AA	AA	TA	TA	AA	AA	TA
contig43029_39	C	A	AC	CC	AC	CC	CC	AC	AC	AC	CC	AC	AC	CC	CC	AC	AC	CC	CC	CC	AC	CC	AC	AC	AC	AC	AC	AC	CC	AC	AC	CC	CC	CC	CC	CC	CC	AC	CC	AC	AC	AC	AC	AC	AC	AC	AC	AC	AC
contig841515_85	A	C	CA	CA	AA	AA	CA	AA	AA	CA	CA	CA	AA	AA	AA	CA	AA	AA	CA	CA	AA	CA	AA	AA	CA	AA	CA	AA	AA	CA	AA	AA	AA	CA	CA	AA	CA	CA	AA	AA	AA	CA	AA	AA	CA	CA	AA	AA	CA
contig10923_172	T	C	CT	CT	TT	TT	CT	TT	TT	CT	CT	CT	TT	TT	TT	CT	TT	TT	CT	CT	TT	CT	TT	TT	CT	TT	CT	TT	TT	CT	TT	TT	TT	CT	CT	TT	CT	CT	TT	TT	TT	CT	TT	TT	CT	CT	TT	TT	CT
contig43029_3	G	A	AG	GG	AG	GG	GG	AG	AG	AG	GG	AG	AG	GG	GG	AG	AG	GG	GG	GG	AG	GG	AG	AG	AG	AG	AG	AG	GG	AG	AG	GG	GG	GG	GG	GG	GG	AG	GG	AG	AG	AG	AG	AG	AG	AG	GG	AG	AG
contig4545_64	T	C	CT	CT	TT	TT	CT	TT	TT	CT	CT	CT	TT	TT	TT	CT	TT	TT	CT	CT	TT	CT	TT	TT	CT	TT	CT	TT	TT	CT	TT	TT	TT	CT	CT	TT	CT	CT	TT	TT	TT	CT	TT	TT	CT	CT	TT	TT	CT
contig10923_191	T	C	TT	CT	CT	CC	CT	CT	CT	TT	CT	TT	CT	CC	CC	TT	CT	CC	CT	CT	CT	CT	CT	CT	TT	CT	CT	CT	CC	TT	CT	CC	CC	CT	CT	CC	CT	TT	CC	CT	CT	TT	CT	CT	CT	TT	CT	CT	TT
contig10923_206	T	C	CT	CT	TT	TT	CT	TT	TT	CT	CT	CT	TT	TT	TT	CT	TT	TT	CT	CT	TT	CT	TT	TT	CT	TT	CT	TT	TT	CT	TT	TT	TT	CT	CT	TT	CT	CT	TT	TT	TT	CT	TT	TT	CT	CT	CT	TT	CT
contig43487_68	G	A	AG	AG	GG	GG	AA	GG	GG	AG	AG	AG	GG	GG	GG	AG	GG	GG	AG	AA	GG	AG	GG	GG	AG	GG	AG	GG	GG	AG	GG	GG	GG	AG	AG	GG	AG	AG	GG	GG	GG	AG	GG	GG	AA	AG	AA	GG	AG
contig21634_53	G	A	AG	AG	GG	GG	AG	GG	GG	AG	AG	AG	GG	GG	GG	AG	GG	GG	AG	AG	GG	AG	GG	GG	AG	GG	AG	GG	GG	AG	GG	GG	GG	AG	AG	GG	AG	AG	GG	GG	GG	AG	GG	GG	AG	AG	AG	GG	AG
contig522764_161	T	G	TT	GT	GT	GG	GT	GT	GT	TT	GT	TT	GT	GG	GG	TT	GT	GG	GT	GT	GT	GT	GT	GT	TT	GT	TT	GT	GG	TT	GT	GG	GG	GT	GT	GG	GT	TT	GG	GT	GT	TT	GT	GT	GT	TT	GT	GT	TT
contig21634_169	G	A	AG	AG	GG	GG	AG	GG	GG	AG	AG	AG	GG	GG	GG	AG	GG	GG	AG	AG	GG	AG	GG	GG	AG	GG	AG	GG	GG	AG	GG	GG	GG	AG	AG	GG	AG	AG	GG	GG	GG	AG	GG	GG	AG	AG	AG	GG	AG
contig497442_10	A	T	TA	TA	AA	AA	TA	AA	AA	TA	TA	TA	AA	AA	AA	TA	AA	AA	TA	TA	AA	TA	AA	AA	TA	AA	TA	AA	AA	TA	AA	AA	AA	TA	TA	AA	TA	TA	AA	AA	AA	TA	AA	AA	TA	TA	TA	AA	TA
contig43487_107	T	G	GT	GT	TT	TT	GG	TT	TT	GT	GT	GT	TT	TT	TT	GT	TT	TT	GT	GG	TT	GT	TT	TT	GT	TT	GT	TT	TT	GT	TT	TT	TT	GT	GT	TT	GT	GT	TT	TT	TT	GT	TT	TT	GT	GT	GT	TT	GT
contig10923_65	T	G	GT	GT	TT	TT	GT	TT	TT	GT	GT	GT	TT	TT	TT	GT	TT	TT	GT	GT	TT	GT	TT	TT	GT	TT	GT	TT	TT	GT	TT	TT	TT	GT	GT	TT	GT	GT	TT	TT	TT	GT	TT	TT	GT	GT	GT	TT	GT
contig823810_117	A	G	GA	GA	AA	AA	GA	AA	AA	GA	GA	GA	AA	AA	AA	GA	AA	AA	GA	GA	AA	GA	AA	AA	GA	AA	GA	AA	AA	GA	AA	AA	AA	GA	GA	AA	GA	GA	AA	AA	AA	GA	AA	AA	GA	GA	GA	AA	GA
contig10923_122	T	G	TT	GT	GT	GG	GT	GT	GT	TT	GT	TT	GT	GG	GG	TT	GT	GG	GT	GT	GT	GT	GT	GT	TT	GT	TT	GT	GG	TT	GT	GG	GG	GT	GT	GG	GT	TT	GG	GT	GT	TT	GT	GT	TT	TT	TT	GT	TT
contig32442_89	A	G	GA	AA	GA	AA	AA	GA	GA	GA	AA	GA	GA	AA	AA	GA	GA	AA	AA	AA	GA	AA	GA	GA	GA	GA	GA	GA	AA	GA	GA	AA	AA	AA	AA	AA	AA	GA	AA	GA	GA	GA	GA	GA	GA	GA	GA	GA	GA
contig10923_186	C	T	TC	TC	CC	CC	TC	CC	CC	TC	TC	TC	CC	CC	CC	TC	CC	CC	TC	TC	CC	TC	CC	CC	TC	CC	TC	CC	CC	TC	CC	CC	CC	TC	TC	CC	TC	TC	CC	CC	CC	TC	CC	CC	TC	TC	TC	CC	TC
contig32442_51	A	T	TA	AA	TA	AA	AA	TA	TA	TA	AA	TA	TA	AA	AA	TA	TA	AA	AA	AA	TA	AA	TA	TA	TA	TA	TA	TA	AA	TA	TA	AA	AA	AA	AA	AA	AA	TA	AA	TA	TA	TA	TA	TA	TA	TA	TA	TA	TA
contig21634_62	A	T	TA	TA	AA	AA	TA	AA	AA	TA	TA	TA	AA	AA	AA	TA	AA	AA	TA	TA	AA	TA	AA	AA	TA	AA	TA	AA	AA	TA	AA	AA	AA	TA	TA	AA	TA	TA	AA	AA	AA	TA	AA	AA	TA	TA	TA	AA	TA
contig43487_65	G	A	AG	AG	GG	GG	AA	GG	GG	AG	AG	AG	GG	GG	GG	AG	GG	GG	AG	AA	GG	AG	GG	GG	AG	GG	AG	GG	GG	AG	GG	GG	GG	AG	AG	GG	AG	AG	GG	GG	GG	AG	GG	GG	AG	AG	GG	GG	AG
contig607605_48	G	A	AG	GG	AG	GG	GG	AG	AG	AG	GG	AG	AG	GG	GG	AG	AG	GG	GG	GG	AG	GG	AG	AG	AG	AG	AG	AG	GG	AG	AG	GG	GG	GG	GG	GG	GG	AG	GG	AG	AG	AG	AG	AG	AG	AG	AG	AG	AG
contig841515_95	G	A	AG	AG	GG	GG	AG	GG	GG	AG	AG	AG	GG	GG	GG	AG	GG	GG	AG	AG	GG	AG	GG	GG	AG	GG	AG	GG	GG	AG	GG	GG	GG	AG	AG	GG	AG	AG	GG	GG	GG	AG	GG	GG	AG	AG	GG	GG	AG
contig37982_77	T	G	GT	TT	GT	TT	TT	GT	GT	GT	TT	GT	GT	TT	TT	GT	GT	TT	TT	TT	GT	TT	GT	GT	GT	GT	GT	GT	TT	GT	GT	TT	TT	TT	TT	TT	TT	GT	TT	GT	GT	GT	GT	GT	GT	GT	GT	GT	GT
contig32442_47	A	G	GA	AA	GA	AA	AA	GA	GA	GA	AA	GA	GA	AA	AA	GA	GA	AA	AA	AA	GA	AA	GA	GA	GA	GA	GA	GA	AA	GA	GA	AA	AA	AA	AA	AA	AA	GA	AA	GA	GA	GA	GA	GA	GA	GA	GA	GA	GA
contig32442_96	A	G	GA	AA	GA	AA	AA	GA	GA	GA	AA	GA	GA	AA	AA	GA	GA	AA	AA	AA	GA	AA	GA	GA	GA	GA	GA	GA	AA	GA	GA	AA	AA	AA	AA	AA	AA	GA	AA	GA	GA	GA	GA	GA	GA	GA	GA	GA	GA
contig607605_120	G	A	AG	GG	AG	GG	GG	AG	AG	AG	GG	AG	AG	GG	GG	AG	AG	GG	GG	GG	AG	GG	AG	AG	AG	AG	AG	AG	GG	AG	AG	GG	GG	GG	GG	GG	GG	AG	GG	AG	AG	AG	AG	AG	AG	AG	AG	AG	AG
contig43487_177	G	A	GG	AG	AG	AA	AA	GG	GG	GG	AG	GG	AG	AA	AA	GG	AG	AA	AG	GG	AG	AG	AG	AG	GG	AG	GG	AG	AA	GG	AG	AG	AA	AG	AG	AA	AG	GG	AA	AG	AG	GG	AG	AG	GG	GG	GG	AG	GG
contig43487_201	C	G	GG	GC	GC	CC	CC	GG	GG	GG	GC	GG	GC	CC	CC	GG	GC	CC	GC	GG	GC	GC	GC	GC	GG	GC	GG	GC	CC	GG	GC	GC	CC	GC	GC	CC	GC	GG	CC	GC	GC	GG	GC	GC	GC	GG	GG	GC	GG
contig30807_25	T	C	CT	TT	CT	TT	TT	CT	CT	CT	TT	CT	CT	TT	TT	CT	CT	TT	TT	TT	CT	TT	CT	CT	CT	CT	CT	CT	TT	CT	CT	CT	TT	TT	TT	TT	TT	CT	TT	CT	CT	CT	CT	CT	CT	CT	CT	CT	CT
contig4545_34	G	A	AG	GG	AG	GG	GG	AG	AG	AG	GG	AG	AG	GG	GG	AG	AG	GG	GG	GG	AG	GG	AG	AG	AG	AG	AG	AG	GG	AG	AG	AG	GG	GG	GG	GG	GG	AG	GG	AG	AG	AG	AG	AG	AG	AG	AG	AG	AG
contig499528_7	A	C	CA	AA	CA	AA	AA	CA	CA	CA	AA	CA	CA	AA	AA	CA	CA	AA	AA	AA	CA	AA	CA	CA	CA	CA	CA	CA	AA	CA	CA	CA	AA	AA	AA	AA	AA	CA	AA	CA	CA	CA	CA	CA	CA	CA	CA	CA	CA
contig55043_263	C	A	AC	CC	AC	CC	CC	AC	AC	AC	CC	AC	AC	CC	CC	AC	AC	CC	CC	CC	AC	CC	AC	AC	AC	AC	AC	AC	CC	AC	AC	AC	CC	CC	CC	CC	CC	AC	CC	AC	AC	AC	AC	AC	AA	AC	AC	AC	AC
contig4545_96	C	T	TC	CC	TC	CC	CC	TC	TC	TC	CC	TC	TC	CC	CC	TC	TC	CC	CC	CC	TC	CC	TC	TC	TC	TC	TC	TC	CC	TC	TC	TC	CC	CC	CC	CC	CC	TC	CC	TC	TC	TC	TC	TC	TC	TC	TC	TC	TC
contig611117_32	T	C	CT	TT	CT	TT	TT	CT	CT	CT	TT	CT	CT	TT	TT	CT	CT	TT	TT	TT	CT	TT	CT	CT	CT	CT	CT	CT	TT	CT	CT	CT	TT	TT	TT	TT	TT	CT	TT	CT	CT	CT	CT	CT	CT	CT	CT	CT	CT
contig459339_50	G	T	TG	GG	TG	GG	GG	TG	TG	TG	GG	TG	TG	GG	GG	TG	TG	GG	GG	GG	TG	GG	TG	TG	TG	TG	TG	TG	GG	TG	TG	TG	GG	GG	GG	GG	GG	TG	GG	TG	TG	TG	TG	TG	TG	TG	TG	TG	TG
contig55043_240	C	A	AC	CC	AC	CC	CC	AC	AC	AC	CC	AC	AC	CC	CC	AC	AC	CC	CC	CC	AC	CC	AC	AC	AC	AC	AC	AC	CC	AC	AC	AC	CC	CC	CC	CC	CC	AC	CC	AC	AC	AC	AC	AC	AC	AC	AC	AC	AC
contig499528_45	T	C	CT	TT	CT	TT	TT	CT	CT	CT	TT	CT	CT	TT	TT	CT	CT	TT	TT	TT	CT	TT	CT	CT	CT	CT	CT	CT	TT	CT	CT	CT	TT	TT	TT	TT	TT	CT	TT	CT	CT	CT	CT	CT	CT	CT	CT	CT	CT
contig462760_59	G	A	AG	GG	AG	GG	GG	AG	AG	AG	GG	AG	AG	GG	GG	AG	AG	GG	GG	GG	AG	GG	AG	AG	AG	AG	AG	AG	GG	AG	AG	AG	GG	GG	GG	GG	GG	AG	GG	AG	AG	AG	AG	AG	AG	AG	AG	AG	AG
contig16466_24	A	G	GA	AA	GA	AA	AA	GA	GA	GA	AA	GA	GA	AA	AA	GA	GA	AA	AA	AA	GA	AA	GA	GA	GA	GA	GA	GA	AA	GA	GA	GA	AA	AA	AA	AA	AA	GA	AA	GA	GA	GA	GA	GA	GA	GA	GA	GA	GA
contig19056_238	G	A	AG	GG	AG	GG	GG	AG	AG	AG	GG	AG	AG	GG	GG	AG	AG	GG	GG	GG	AG	GG	AG	AG	AG	AG	AG	AG	GG	AG	AG	AG	GG	GG	GG	GG	GG	AG	GG	AG	AG	AG	AG	AG	AG	AG	AG	AG	AG
contig37982_17	G	C	CG	GG	CG	GG	GG	CG	CG	CG	GG	CG	CG	GG	GG	CG	CG	GG	GG	GG	CG	GG	CG	CG	CG	CG	CG	CG	GG	CG	CG	CG	GG	GG	GG	GG	GG	CG	GG	CG	CG	CG	CG	CG	CG	CG	CG	CG	CG
contig4545_58	T	A	TT	AT	AT	AA	AT	AT	AT	TT	AT	TT	AT	AA	AA	TT	AT	AA	AT	AT	AT	AT	TT	AT	TT	AT	TT	AT	AA	TT	AT	AT	AA	AT	AT	AA	AT	TT	AA	AT	AT	TT	AT	AT	TT	TT	TT	AT	TT
contig692706_142	T	G	GT	TT	GT	TT	TT	GT	GT	GT	TT	GT	GT	TT	TT	GT	GT	TT	TT	TT	GT	TT	GT	GT	GT	GT	GT	GT	TT	GT	GT	GT	TT	TT	TT	TT	TT	GT	TT	GT	GT	GT	GT	GT	GT	GT	GT	GT	GT
contig462760_68	A	T	TA	AA	TA	AA	AA	TA	TA	TA	AA	TA	TA	AA	AA	TA	TA	AA	AA	AA	TA	AA	TA	TA	TA	TA	TA	TA	AA	TA	TA	TA	AA	AA	AA	AA	AA	TA	AA	TA	TA	TA	TA	TA	TA	TA	TA	TA	TA
contig49904_133	A	T	TA	AA	TA	AA	AA	TA	TA	TA	AA	TA	TA	AA	AA	TA	TA	AA	AA	AA	TA	AA	TA	TA	TA	TA	TA	TA	AA	TA	TA	TA	AA	AA	AA	AA	AA	TA	AA	TA	TA	TA	TA	TA	TA	TA	TA	TA	TA
contig679975_56	C	T	CC	TT	TC	TT	TT	TC	TC	CC	TC	CC	TC	TT	TT	CC	TC	TT	TC	TC	TC	TC	TC	TC	CC	TC	CC	TC	TT	CC	TC	TC	TT	TC	TC	TT	TC	CC	TT	TC	TC	CC	TC	TC	CC	TC	TC	TC	CC
contig740210_88	T	G	GG	GT	GT	TT	GT	GT	GT	GG	GT	GG	GT	TT	TT	GG	GT	TT	GT	GG	GT	GT	GT	GG	GG	GT	GG	GT	TT	GG	GT	GT	TT	GT	GT	TT	GT	GG	TT	GT	GT	GG	GT	GT	GG	GT	GT	GT	GG
contig499528_53	G	A	AG	GG	AG	GG	GG	AG	AG	AG	GG	AG	AG	GG	GG	AG	AG	GG	GG	GG	AG	GG	AG	AG	AG	AG	AG	AG	GG	AG	AG	AG	GG	GG	GG	GG	GG	AG	GG	AG	AG	AG	AG	AG	AG	AG	AG	AG	AG
contig19049_248	G	C	CG	GG	CG	GG	GG	CG	CG	CG	GG	CG	CG	GG	GG	CG	CG	GG	GG	GG	CG	GG	CG	CG	CG	CG	CG	CG	GG	CG	CG	CG	GG	GG	GG	GG	GG	CG	GG	CG	CG	CG	CG	CG	CG	GG	CG	CG	CG
contig49904_172	A	G	GA	AA	GA	AA	AA	GA	GA	GA	AA	GA	GA	AA	AA	GA	GA	AA	AA	AA	GA	AA	GA	GA	GA	GA	GA	GA	AA	GA	GA	GA	AA	AA	AA	AA	AA	GA	AA	GA	GA	GA	GA	GA	GA	AA	GA	GA	GA
contig740210_79	C	A	CC	AC	AC	AA	AC	AC	AC	CC	AC	CC	AC	AA	AA	CC	AC	AA	AC	CC	AC	AC	AC	CC	CC	AC	CC	AC	AA	CC	AC	AC	AA	AC	AC	AA	AC	CC	AA	AC	AC	CC	AC	AC	CC	AC	AC	AC	CC
contig740210_170	G	A	AA	AG	AG	GG	AG	AG	AG	AA	AG	AA	AG	GG	GG	AA	AG	GG	AG	AA	AG	AG	AG	AA	AA	AG	AA	AG	GG	AA	AG	AG	GG	AG	AG	GG	AG	AA	GG	AG	AG	AA	AG	AG	AA	GG	AA	AG	AA
contig740210_77	A	C	CC	CA	CA	AA	CA	CA	CA	CC	CA	CC	CA	AA	AA	CC	CA	AA	CA	CC	CA	CA	CA	CC	CC	CA	CC	CA	AA	CC	CA	CA	AA	CA	CA	AA	CA	CC	AA	CA	CA	CC	CA	CA	CC	AA	CC	CA	CC
contig740210_18	G	T	GG	TG	TG	TT	TG	TG	TG	GG	TG	GG	TG	TT	TT	GG	TG	TT	TG	GG	TG	TG	TG	GG	GG	TG	GG	TG	TT	GG	TG	TG	TT	TG	TG	TT	TG	GG	TT	TG	TG	GG	TG	TG	GG	TT	GG	TG	GG
contig19049_42	C	G	CC	GC	GC	GG	GC	GC	GC	CC	GC	CC	GC	GG	GG	CC	GC	GG	GC	GC	GC	GC	GC	GC	CC	GC	CC	GC	GG	CC	GC	GC	GG	GC	GC	GG	GC	CC	GG	GC	GC	CC	GC	GC	CC	CC	CC	GC	CC
contig35799_186	A	G	GA	GA	AA	AA	GA	AA	AA	GA	GA	GA	AA	AA	AA	GA	AA	AA	GA	GA	AA	GA	AA	AA	GA	AA	GA	AA	AA	GA	AA	AA	AA	GA	GA	AA	GA	GA	AA	AA	AA	GA	AA	AA	GA	GA	GA	AA	GA
contig692706_65	G	A	GG	AG	AG	AA	AG	AG	AG	GG	AG	GG	AG	AA	AA	GG	AG	AA	AG	AG	AG	AG	AG	AG	GG	AG	GG	AG	AA	GG	AG	AG	AA	AG	AG	AA	AG	GG	AA	AG	AG	GG	AG	AG	GG	GG	GG	AG	GG
contig19049_225	C	A	CC	AC	AC	AA	AC	AC	AC	CC	AC	CC	AC	AA	AA	CC	AC	AA	AC	AC	AC	AC	AC	AC	CC	AC	CC	AC	AA	CC	AC	AC	AA	AC	AC	AA	AC	CC	AA	AC	AC	CC	AC	AC	AC	CC	CC	AC	CC
contig55043_164	C	T	CC	TC	TC	TT	TC	TC	TC	CC	TC	CC	TC	TT	TT	CC	TC	TT	TC	TC	TC	TC	TC	TC	CC	TC	CC	TC	TT	CC	TC	TC	TT	TC	TC	TT	TC	CC	TT	TC	TC	CC	TC	TC	TC	CC	CC	TC	CC
contig720665_113	A	C	CA	CA	AA	AA	CA	AA	AA	CA	CA	CA	AA	AA	AA	CA	AA	AA	CA	CA	AA	CA	AA	AA	CA	AA	CA	AA	AA	CA	AA	AA	AA	CA	CA	AA	CA	CA	AA	AA	AA	CA	AA	AA	CA	CA	CA	AA	CA
contig35799_233	A	G	GA	GA	AA	AA	GA	AA	AA	GA	GA	GA	AA	AA	AA	GA	AA	AA	GA	GA	AA	GA	AA	AA	GA	AA	GA	AA	AA	GA	AA	AA	AA	GA	GA	AA	GA	GA	AA	AA	AA	GA	AA	AA	GA	GA	GA	AA	GA
contig692706_140	A	T	TA	TA	AA	AA	TA	AA	AA	TA	TA	TA	AA	AA	AA	TA	AA	AA	TA	TA	AA	TA	AA	AA	TA	AA	TA	AA	AA	TA	AA	AA	AA	TA	TA	AA	TA	TA	AA	AA	AA	TA	AA	AA	TA	TA	TA	AA	TA
contig11049_99	A	T	AA	TA	TA	TT	TA	TA	TA	AA	TA	AA	TA	TT	TT	AA	TA	TT	AA	TA	TA	TA	TA	TA	AA	TA	AA	TA	TT	AA	TA	TA	TT	TA	TA	TT	TA	AA	TT	TA	TA	AA	TA	TA	TA	TA	TA	TA	AA
contig740210_236	T	C	CT	CT	TT	TT	CT	TT	TT	CT	CT	CT	TT	TT	TT	CT	TT	TT	CT	CC	TT	CT	TT	TT	CT	TT	CT	TT	TT	CT	TT	TT	TT	CT	CT	TT	CT	CT	TT	TT	TT	CT	TT	TT	CC	CC	CC	TT	CT
contig19056_91	G	A	GG	AG	AG	AA	AG	AG	AG	GG	AG	GG	AG	AA	AA	GG	AG	AA	AG	AG	AG	AG	AG	AG	GG	AG	GG	AG	AA	GG	AG	AG	AA	AG	AG	AA	AG	GG	AA	AG	AG	GG	AG	AG	GG	GG	GG	AG	GG
contig19049_224	G	A	GG	AG	AG	AA	AG	AG	AG	GG	AG	GG	AG	AA	AA	GG	AG	AA	AG	AG	AG	AG	AG	AG	GG	AG	GG	AG	AA	GG	AG	AG	AA	AG	AG	AA	AG	GG	AA	AG	AG	GG	AG	AG	GG	GG	GG	AG	GG
contig740210_23	A	G	GA	GA	AA	AA	GA	AA	AA	GA	GA	GA	AA	AA	AA	GA	AA	AA	GA	GG	AA	GA	AA	AA	GA	AA	GA	AA	AA	GA	AA	AA	AA	GA	GA	AA	GA	GA	AA	AA	AA	GA	AA	AA	GG	GG	GG	AA	GA
contig19049_50	C	T	TC	TC	CC	CC	TC	CC	CC	TC	TC	TC	CC	CC	CC	TC	CC	CC	TC	TC	CC	TC	CC	CC	TC	CC	TC	CC	CC	TC	CC	CC	CC	TC	TC	CC	TC	TC	CC	CC	CC	TC	CC	CC	TC	TC	TC	CC	TC
contig35799_96	T	C	CT	CT	TT	TT	CT	TT	TT	CT	CT	CT	TT	TT	TT	CT	TT	TT	CT	CT	TT	CT	TT	TT	CT	TT	CT	TT	TT	CT	TT	TT	TT	CT	CT	TT	CT	CT	TT	TT	TT	CT	TT	TT	CT	CT	CT	TT	CT
contig19049_65	C	T	CC	TC	TC	TT	TC	TC	TC	CC	TC	CC	TC	TT	TT	CC	TC	TT	TC	TC	TC	TC	TC	TC	CC	TC	CC	TC	TT	CC	TC	TC	TT	TC	TC	TT	TC	CC	TT	TC	TC	CC	TC	TC	CC	TC	TC	TC	CC
contig19049_118	A	T	AA	TA	TA	TT	TA	TA	TA	AA	TA	AA	TA	TT	TT	AA	TA	TT	TA	TA	TA	TA	TA	TA	AA	TA	AA	TA	TT	AA	TA	TA	TT	TA	TA	TT	TA	AA	TT	TA	TA	AA	TA	TA	AA	TA	TA	TA	AA
contig611117_97	G	A	GG	AG	AG	AA	AG	AG	AG	GG	AG	GG	AG	AA	AA	GG	AG	AA	AG	AG	AG	AG	AG	AG	GG	AG	GG	AG	AA	GG	AG	AG	AA	AG	AG	AA	AG	GG	AA	AG	AG	GG	AG	AG	GG	AG	AG	AG	GG
contig454690_25	C	T	CC	TC	TC	TT	TC	TC	TC	CC	TC	CC	TC	TT	TT	CC	TC	TT	TC	TC	TC	TC	TC	TC	CC	TC	CC	TC	TT	CC	TC	TC	TT	TC	TC	TT	TC	CC	TT	TC	TC	CC	TC	TC	CC	TC	TC	TC	CC
contig16466_45	T	C	TT	CT	CT	CC	CT	CT	CT	TT	CT	TT	CT	CC	CC	TT	CT	CC	CT	CT	CT	CT	CT	CT	TT	CT	TT	CT	CC	TT	CT	CT	CC	CT	CT	CC	CT	TT	CC	CT	CT	TT	CT	CT	TT	CT	CT	CT	TT
contig499528_157	T	A	TT	AT	AT	AA	AT	AT	AT	TT	AT	TT	AT	AA	AA	TT	AT	AA	AT	AT	AT	AT	AT	AT	TT	AT	TT	AT	AA	TT	AT	AT	AA	AT	AT	AA	AT	TT	AA	AT	AT	TT	AT	AT	TT	AT	AT	AT	TT
contig683959_181	T	A	AT	TT	AT	TT	TT	AT	AT	AT	TT	AT	AT	TT	TT	AT	AT	TT	TT	TT	AT	TT	AT	AT	AT	AT	AT	AT	TT	AT	AT	AT	TT	TT	TT	TT	TT	AT	TT	AT	AT	AT	AT	AT	AT	AT	AT	AT	AT
contig702402_58	A	G	GA	AA	GA	AA	AA	GA	GA	GA	AA	GA	GA	AA	AA	GA	GA	AA	AA	AA	GA	AA	GA	GA	GA	GA	GA	GA	AA	GA	GA	GA	AA	AA	AA	AA	AA	GA	AA	GA	GA	GA	GA	GA	GA	GA	GA	GA	GA
contig459339_116	G	C	CG	CG	GG	GG	CG	GG	GG	CG	CG	CG	GG	GG	GG	CG	GG	GG	CG	CG	GG	CG	GG	GG	CG	GG	CG	GG	GG	CG	GG	GG	GG	CG	CG	GG	CG	CG	GG	GG	GG	CG	GG	GG	GG	CG	CG	GG	CG
contig720665_72	A	G	GA	AA	GA	AA	AA	GA	GA	GA	AA	GA	GA	AA	AA	GA	GA	AA	AA	AA	GA	AA	GA	GA	GA	GA	GA	GA	AA	GA	GA	GA	AA	AA	AA	AA	AA	GA	AA	GA	GA	GA	GA	GA	GA	GA	GA	GA	GA
contig702402_129	C	T	TC	CC	TC	CC	CC	TC	TC	TC	CC	TC	TC	CC	CC	TC	TC	CC	CC	CC	TC	CC	TC	TC	TC	TC	TC	TC	CC	TC	TC	TC	CC	CC	CC	CC	CC	TC	CC	TC	TC	TC	TC	TC	TC	TC	TC	TC	TC
contig451_130	A	T	TA	AA	TA	AA	AA	TA	TA	TA	AA	TA	TA	AA	AA	TA	TA	AA	AA	AA	TA	AA	TA	TA	TA	TA	TA	TA	AA	TA	TA	TA	AA	AA	AA	AA	AA	TA	AA	TA	TA	TA	TA	TA	TA	TA	TA	TA	TA
contig49904_112	C	T	TC	TC	CC	CC	TC	CC	CC	TC	TC	TC	CC	CC	CC	TC	CC	CC	TC	TC	CC	TC	CC	CC	TC	CC	TC	CC	CC	TC	CC	CC	CC	TC	TC	CC	TC	TC	CC	CC	CC	TC	CC	CC	CC	TC	TC	CC	TC
contig29397_139	C	G	GC	GC	CC	CC	GC	CC	CC	GC	GC	GC	CC	CC	CC	GC	CC	CC	GC	GC	CC	GC	CC	CC	GC	CC	GC	CC	CC	GC	CC	CC	CC	GC	GC	CC	GC	GC	CC	CC	CC	GC	CC	CC	GC	GC	GC	CC	GC
contig683959_155	A	T	TA	AA	TA	AA	AA	TA	TA	TA	AA	TA	TA	AA	AA	TA	TA	AA	AA	AA	TA	AA	TA	TA	TA	TA	TA	TA	AA	TA	TA	TA	AA	AA	AA	AA	AA	TA	AA	TA	TA	TA	TA	TA	TA	TA	TA	TA	TA
contig55043_81	C	G	GC	GC	CC	CC	GC	CC	CC	GC	GC	GC	CC	CC	CC	GC	CC	CC	GC	GC	CC	GC	CC	CC	GC	CC	GC	CC	CC	GC	CC	CC	CC	GC	GC	CC	GC	GC	CC	CC	CC	GC	CC	CC	GC	GC	GC	CC	GC
contig42821_107	G	A	AG	GG	AG	GG	GG	AG	AG	AG	GG	AG	AG	GG	GG	AG	AG	GG	GG	GG	AG	GG	AG	AG	AG	AG	AG	AG	GG	AG	AG	AG	GG	GG	GG	GG	GG	AG	GG	AG	AG	AG	AG	AG	AG	AG	AG	AG	AG
contig611117_52	A	G	GA	GA	AA	AA	GA	AA	AA	GA	GA	GA	AA	AA	AA	GA	AA	AA	GA	GA	AA	GA	AA	AA	GA	AA	GA	AA	AA	GA	AA	AA	AA	GA	GA	AA	GA	GA	AA	AA	AA	GA	AA	AA	GA	GA	GA	AA	GA
contig49904_207	C	G	GC	GC	CC	CC	GC	CC	CC	GC	GC	GC	CC	CC	CC	GC	CC	CC	GC	GC	CC	GC	CC	CC	GC	CC	GC	CC	CC	GC	CC	CC	CC	GC	GC	CC	GC	GC	CC	CC	CC	GC	CC	CC	CC	GC	GC	CC	GC
contig16466_153	G	T	TG	TG	GG	GG	TG	GG	GG	TG	TG	TG	GG	GG	GG	TG	GG	GG	TG	TG	GG	TG	GG	GG	TG	GG	TG	GG	GG	TG	GG	GG	GG	TG	TG	GG	TG	TG	GG	GG	GG	TG	GG	GG	TG	TG	TG	GG	TG
contig29397_140	A	G	GA	GA	AA	AA	GA	AA	AA	GA	GA	GA	AA	AA	AA	GA	AA	AA	GA	GA	AA	GA	AA	AA	GA	AA	GA	AA	AA	GA	AA	AA	AA	GA	GA	AA	GA	GA	AA	AA	AA	GA	AA	AA	GA	GA	GA	AA	GA
contig451_192	T	C	TT	CT	CT	CC	CT	CT	CT	TT	CT	TT	CT	CC	CC	TT	CT	CC	CT	CT	CT	CT	CT	CT	TT	CT	TT	CT	CC	TT	CT	CT	CC	CT	CT	CC	CT	TT	CC	CT	CT	TT	CT	CT	TT	TT	TT	CT	TT
contig782928_59	G	A	GG	AG	AG	AA	GG	AG	AG	GG	AG	GG	AG	AA	AG	GG	AG	AA	AG	AG	AG	AG	AG	AG	GG	AG	GG	AG	AA	AG	AG	AG	AA	AG	AG	AA	AG	GG	AA	AA	AG	GG	AG	AG	AG	AG	AG	AG	GG
contig782928_103	C	T	TC	TC	CC	CC	TC	CC	CC	TC	TC	TC	CC	CC	CC	TC	CC	CC	TC	TC	CC	TC	CC	CC	TC	CC	TC	CC	CC	TC	CC	CC	CC	TC	TC	CC	TC	TC	CC	CC	CC	TC	CC	CC	CC	TC	TC	CC	TC
contig702402_46	A	T	TA	TA	AA	AA	TA	AA	AA	TA	TA	TA	AA	AA	AA	TA	AA	AA	TA	TA	AA	TA	AA	AA	TA	AA	TA	AA	AA	TA	AA	AA	AA	TA	TA	AA	TA	TA	AA	AA	AA	TA	AA	AA	TA	TA	TA	AA	TA
contig702402_151	G	A	AG	AG	GG	GG	AG	GG	GG	AG	AG	AG	GG	GG	GG	AG	GG	GG	AG	AG	GG	AG	GG	GG	AG	GG	AG	GG	GG	AG	GG	GG	GG	AG	AG	GG	AG	AG	GG	GG	GG	AG	GG	GG	AG	AG	AG	GG	AG
contig782928_34	G	C	CG	GG	CG	GG	GG	CG	CG	CG	GG	CG	CG	GG	CG	CG	CG	GG	GG	GG	CG	GG	CG	CG	CG	CG	CG	CG	GG	GG	CG	CG	GG	GG	GG	GG	GG	CG	GG	CG	CG	CG	CG	CG	GG	GG	GG	CG	CG
contig41673_142	C	T	CC	TC	TC	TT	TC	TT	TC	CC	TC	CC	TT	TT	TC	CC	TC	TT	TC	TC	TC	TC	TT	TC	CC	TC	CC	TT	TT	TC	TC	TC	TT	TC	TC	TT	TC	CC	TT	TC	TT	CC	TC	TC	TC	TC	TC	TC	CC
contig49162_132	A	G	AA	GA	GA	GG	GA	GA	GA	AA	GA	AA	GA	GG	GA	AA	GA	GG	GA	GA	GA	GA	GA	GA	AA	GA	AA	GA	GG	AA	GA	GA	GG	GA	AA	GG	GA	AA	GG	GA	GA	AA	GA	GA	GA	GA	GA	GA	AA
contig49162_151	A	T	TA	TA	AA	AA	TA	AA	AA	TA	TA	TA	AA	AA	AA	TA	AA	AA	TA	TA	AA	TA	AA	AA	TA	AA	TA	AA	AA	TA	AA	AA	AA	TA	TA	AA	TA	TA	AA	AA	AA	TA	AA	AA	TA	TA	TA	AA	TA
contig49162_149	G	T	TG	TG	GG	GG	TG	GG	GG	TG	TG	TG	GG	GG	GG	TG	GG	GG	TG	TG	GG	TG	GG	GG	TG	GG	TG	GG	GG	TG	GG	GG	GG	TG	TG	GG	TG	TG	GG	GG	GG	TG	GG	GG	TG	TG	TG	GG	TG
contig12845_67	A	G	GA	GA	AA	AA	GA	AA	AA	GA	GA	GA	AA	AA	AA	GA	AA	AA	GA	GA	AA	GA	AA	AA	GA	AA	GA	AA	AA	GA	AA	AA	AA	GA	GA	AA	GA	GA	AA	AA	AA	GA	AA	AA	GA	GA	GA	AA	GA
contig45034_12	G	A	AG	AG	GG	GG	AG	GG	GG	AG	AG	AG	GG	GG	GG	AG	GG	GG	AG	AG	GG	AG	GG	GG	AG	GG	AG	GG	GG	AG	GG	GG	GG	AG	AG	GG	AG	AG	GG	GG	GG	AG	GG	GG	AG	AG	AG	GG	AG
contig49162_98	T	A	TT	AT	AT	AA	AT	AT	AT	TT	AT	TT	AT	AA	AT	TT	AT	AA	AT	AT	AT	AT	AT	AT	TT	AT	TT	AT	AA	TT	AT	AT	AA	AT	TT	AA	AT	TT	AA	AT	AT	TT	AT	AT	TT	TT	TT	AT	TT
contig49162_97	A	T	AA	TA	TA	TT	TA	TA	TA	AA	TA	AA	TA	TT	TA	AA	TA	TT	TA	TA	TA	TA	TA	TA	AA	TA	AA	TA	TT	TA	TA	TA	TT	TA	TA	TT	TA	AA	TT	TA	TA	AA	TA	TA	AA	AA	AA	TA	AA
contig45034_41	A	T	AA	TA	TA	TT	TA	TA	TA	AA	TA	AA	TA	TT	TA	AA	TA	TT	TA	TA	TA	TA	TA	TA	AA	TA	AA	TA	TT	TA	TA	TA	TT	TA	TA	TT	TA	AA	TT	TA	TA	AA	TA	TA	AA	AA	AA	TA	AA
contig12845_91	T	C	CT	CT	TT	TT	CT	TT	TT	CT	CT	CT	TT	TT	TT	CT	TT	TT	CT	CT	TT	CT	TT	TT	CT	TT	CT	TT	TT	CT	TT	TT	TT	CT	CT	TT	CT	CT	TT	TT	TT	CT	TT	TT	CT	CT	CT	TT	CT
contig45034_114	C	T	CC	TC	TC	TT	TC	TC	TC	CC	TC	CC	TC	TT	TC	CC	TC	TT	TC	TC	TC	TC	TC	TC	CC	TC	CC	TC	TT	TC	TC	TC	TT	TC	TC	TT	TC	CC	TT	TC	TC	CC	TC	TC	CC	CC	CC	TC	CC
contig602330_127	C	T	TC	TC	CC	CC	TC	CC	CC	CC	TC	TC	CC	CC	CC	TC	CC	CC	TC	TC	CC	TC	TC	CC	TC	CC	TC	CC	CC	TC	CC	CC	CC	TC	TC	CC	TC	TC	CC	CC	CC	TC	CC	CC	TC	TC	TC	CC	TC
contig602330_52	G	A	GG	AG	AG	AA	AG	AG	AG	AG	AG	GG	AG	AA	AG	GG	AG	AA	AG	AG	AG	AG	GG	AG	GG	AG	GG	AG	AA	AG	AG	AG	AA	AG	AG	AA	AG	GG	AA	AG	AG	GG	AG	AG	GG	GG	GG	AG	GG
contig52906_173	A	G	GA	AA	GA	AA	AA	GA	GA	GA	AA	GA	GA	AA	GA	GA	GA	AA	AA	AA	GA	AA	GA	GA	GA	GA	GA	GA	AA	AA	GA	GA	AA	AA	AA	AA	AA	GA	AA	GA	GA	GA	GA	GA	GA	GA	GA	GA	GA
contig602330_229	C	T	TC	TC	CC	CC	TC	CC	CC	CC	TC	TC	CC	CC	CC	TC	CC	CC	TC	TC	CC	TC	TC	CC	TC	CC	TC	CC	CC	TC	CC	CC	CC	TC	TC	CC	TC	TC	CC	CC	CC	TC	CC	CC	TC	TC	TC	CC	TC
contig602330_47	G	A	GG	AG	AG	AA	AG	AG	AG	AG	AG	GG	AG	AA	AG	GG	AG	AA	AG	AG	AG	AG	GG	AG	GG	AG	GG	AG	AA	AG	AG	AG	AA	AG	AG	AA	AG	GG	AA	AG	AG	GG	AG	AG	AG	AG	AG	AG	GG
contig1577_113	A	C	CA	CA	CA	CC	CA	CA	CA	CA	AA	CA	CA	CC	CA	AA	CA	CC	CA	CA	CA	CA	AA	CA	AA	CA	AA	CA	CC	CA	CA	CA	CC	CA	CA	CC	CA	AA	CC	CA	CA	AA	CC	CA	CA	CA	CA	CA	AA
contig8877_22	C	T	CC	CC	TC	CC	CC	TC	TC	TC	TC	TC	TC	CC	TC	TC	TC	CC	CC	CC	TC	CC	TC	TC	TC	TC	TC	TC	CC	CC	TC	TC	CC	CC	CC	CC	TC	TC	CC	TC	TC	TC	CC	TC	TC	TC	TC	TC	TC
contig1577_89	G	C	CG	CG	CG	CC	CG	CG	CG	CG	GG	CG	CG	CC	CG	GG	CG	CC	CG	CG	CG	CG	GG	CG	GG	CG	GG	CG	CC	CG	CG	CG	CC	CG	CG	CC	CG	GG	CC	CG	CG	GG	CC	CG	CG	CG	CG	CG	GG
contig1577_194	G	A	AG	AG	AG	GG	AG	AG	AG	AG	AA	AG	AG	GG	AG	AA	AG	GG	AG	AG	AG	AG	AA	AG	AA	AG	AA	AG	GG	AG	AG	AG	GG	AG	AG	GG	AG	AA	GG	AG	AG	AA	GG	AG	AG	AG	AG	AG	AA
contig47978_6	G	T	TG	TG	TG	TT	TG	TG	TG	TG	GG	TG	TG	TT	TG	GG	TG	TT	TG	TG	GG	TG	GG	TG	GG	TG	GG	TG	TT	TG	TG	TG	TT	TG	TG	TT	TG	GG	TT	TG	TG	GG	TT	TG	GG	TG	TG	TG	GG
contig47978_211	T	C	CT	CT	CT	CC	CT	CT	CT	CT	TT	CT	CT	CC	CT	TT	CT	CC	CT	CT	TT	CT	TT	CT	TT	CT	TT	CT	CC	CT	CT	CT	CC	CT	CT	CC	CT	TT	CC	CT	CT	TT	CC	CT	TT	CT	CT	CT	TT
contig47978_123	G	A	AG	AG	AG	AA	AG	AG	AG	AG	GG	AG	AG	AA	AG	GG	AG	AA	AG	AG	GG	AG	GG	AG	GG	AG	GG	AG	AA	AG	AG	AG	AA	AG	AG	AA	AG	GG	AA	AG	AG	GG	AA	AG	GG	AG	AG	AG	GG
contig37925_22	T	C	CT	CT	CT	CC	CT	CT	CC	CT	TT	CT	CT	CC	CT	TT	CT	CC	CT	CT	CT	CT	TT	CT	TT	CT	TT	CT	CC	CT	CT	CT	CC	CT	CT	CC	CT	TT	CC	TT	CT	TT	CC	CT	TT	TT	CT	CT	TT
contig37925_107	C	T	TC	TC	TC	CC	TC	TC	CC	TC	TT	TC	TC	CC	TC	TT	TC	CC	TC	TC	TC	TC	TT	TC	TT	TC	TT	TC	CC	TC	TC	TC	CC	TC	TC	CC	TC	TT	CC	TT	TC	TT	CC	TC	TT	TT	TC	TC	TT
contig37925_187	T	A	AT	AT	TT	TT	AT	TT	TT	TT	AT	TT	TT	TT	TT	AT	TT	TT	AT	AT	TT	AT	AT	TT	AT	TT	AT	TT	AT	AT	TT	TT	TT	AT	AT	TT	AT	AT	TT	AT	TT	AT	TT	TT	AT	AT	TT	TT	AT
contig40899_20	A	G	AA	AA	GA	AA	AA	GA	AA	GA	GA	GA	GA	AA	GA	GA	GA	AA	AA	AA	GA	AA	GA	GA	GA	GA	AA	GA	AA	AA	GA	GA	AA	AA	AA	AA	AA	GA	AA	GA	GA	GA	AA	GA	GA	GA	AA	GA	GA
contig3957_46	C	A	AC	AC	CC	CC	AC	CC	CC	CC	AC	CC	CC	CC	CC	AC	CC	CC	AC	AC	CC	AC	AC	CC	AC	CC	AC	CC	AC	AC	CC	CC	CC	AC	AC	CC	AC	AC	CC	AC	CC	CC	CC	CC	AC	AC	CC	CC	AC
contig3957_6	T	C	CT	CT	CT	CC	CT	CT	CC	CT	TT	CT	CT	CC	CT	TT	CT	CC	CT	CT	CT	CT	TT	CT	TT	CT	CT	CT	CT	CT	CT	CT	CC	CT	CT	CC	CT	TT	CC	TT	CT	CT	CC	CT	TT	TT	TT	CT	TT
contig3957_113	T	C	TT	TT	CT	TT	TT	CT	TT	CT	CT	CT	CT	TT	CT	CT	CT	TT	TT	TT	CT	TT	CT	CT	CT	CT	TT	CT	TT	TT	CT	CT	TT	TT	TT	TT	TT	CT	TT	CT	CT	CT	TT	CT	TT	CT	TT	TT	CT
contig3957_127	A	T	TA	TA	AA	AA	TA	AA	AA	AA	TA	AA	AA	AA	AA	TA	AA	AA	TA	TA	AA	TA	TA	AA	TA	AA	TA	AA	TA	TA	AA	AA	AA	TA	TA	AA	TA	TA	AA	TA	AA	AA	AA	AA	TA	TA	AA	AA	TA
contig40899_119	A	G	GA	GA	AA	AA	GA	AA	AA	AA	GA	AA	AA	AA	AA	GA	AA	AA	GA	GA	AA	GA	GA	AA	GA	AA	GA	AA	GA	GA	AA	AA	AA	GA	GA	AA	GA	GA	AA	GA	AA	AA	AA	AA	GA	AA	AA	AA	GA
contig256682_8	A	G	AA	AA	GA	AA	AA	AA	AA	AA	GA	GA	GA	AA	GA	AA	GA	AA	AA	GA	AA	AA	AA	AA	AA	GA	AA	AA	AA	AA	GA	AA	AA	AA	AA	AA	AA	GA	AA	GA	GA	AA	AA	GA	GA	AA	AA	AA	GA
contig256682_22	A	G	GA	GA	AA	GG	GA	GG	GG	GG	AA	GA	GA	GG	GA	AA	GA	GG	GA	AA	GG	GA	AA	GG	AA	GA	GA	GG	GA	GA	GA	GG	GG	GA	GA	GG	GA	AA	GG	AA	GA	GG	GG	GA	AA	GG	AA	AA	AA
contig472423_123	A	G	AA	AA	GA	AA	AA	GA	AA	GA	GA	GA	GA	AA	GA	GA	GA	AA	AA	GA	GA	AA	GA	GA	GA	GA	AA	GA	AA	AA	GA	GA	AA	AA	AA	AA	AA	GA	AA	GA	GA	GA	AA	GA	GA	AA	AA	AA	GA
contig68869_165	C	T	TC	TC	CC	TT	TC	TT	TT	TC	CC	TC	TC	TT	TC	CC	TC	TT	TC	TC	TC	TT	CC	TC	CC	TC	TT	TC	TC	TC	TC	TC	TT	TC	TC	TT	TC	CC	TT	CC	TC	TC	TT	TC	CC	TT	CC	CC	CC
contig720849_207	A	T	AA	AA	TA	AA	AA	TA	AA	TA	TA	TA	TA	AA	TA	TA	TA	AA	AA	TA	TA	AA	TA	TA	TA	TA	AA	TA	AA	AA	TA	TA	AA	AA	AA	AA	AA	TA	AA	TA	TA	TA	AA	TA	TA	AA	AA	AA	TA
contig68869_21	T	C	TT	TT	CT	TT	TT	CT	TT	CT	CT	CT	CT	TT	CT	CT	CT	TT	TT	CT	CT	TT	CT	CT	CT	CT	TT	CT	TT	TT	CT	CT	TT	TT	TT	TT	TT	CT	TT	CT	CT	CT	TT	CT	CT	TT	TT	TT	CT
contig68869_14	C	A	CC	CC	AC	CC	CC	AC	CC	AC	AC	AC	AC	CC	AC	AC	AC	CC	CC	AC	AC	CC	AC	AC	AC	AC	CC	AC	CC	CC	AC	AC	CC	CC	CC	CC	CC	AC	CC	AC	AC	AC	CC	AC	AC	CC	CC	CC	AC
contig68869_24	G	A	GG	GG	AG	GG	GG	AG	GG	AG	AG	AG	AG	GG	AG	AG	AG	GG	GG	AG	AG	GG	AG	AG	AG	AG	GG	AG	GG	GG	AG	AG	GG	GG	GG	GG	GG	AG	GG	AG	AG	AG	GG	AG	AG	GG	GG	GG	AG
contig472423_156	C	T	TT	TC	CC	TT	TT	CC	TT	CC	CC	TC	TC	TT	CC	CC	TC	TT	TC	TC	CC	TT	CC	TC	CC	TC	TC	CC	TT	TC	TC	TC	TT	TC	TC	TT	TC	CC	TT	CC	TC	TC	TT	TC	CC	TT	CC	CC	CC
contig720849_166	T	A	TT	TT	AT	TT	TT	AT	TT	AT	AT	AT	AT	TT	AT	AT	AT	TT	TT	AT	AT	TT	AT	AT	AT	AT	TT	AT	TT	TT	AT	AT	TT	TT	TT	TT	TT	AT	TT	AT	AT	AT	TT	AT	TT	TT	TT	AT	AT
contig68869_206	G	A	GG	GG	AG	GG	GG	AG	GG	AG	AG	AG	AG	GG	AG	AG	AG	GG	GG	AG	AG	GG	AG	AG	AG	AG	GG	AG	GG	GG	AG	AG	GG	GG	GG	GG	GG	AG	GG	AG	AG	AG	GG	AG	AG	GG	GG	AG	AG
contig720849_177	A	G	GA	GA	GA	AA	GA	AA	AA	AA	GA	AA	AA	AA	AA	GA	AA	AA	GA	AA	AA	GA	GA	AA	GA	AA	GA	AA	GA	GA	AA	AA	AA	GA	GA	AA	GA	GA	AA	GA	AA	AA	AA	AA	GA	AA	AA	GA	GA
contig68869_170	T	C	CT	CT	CT	TT	CT	TT	TT	TT	CT	TT	TT	TT	TT	CT	TT	TT	CT	TT	TT	CT	CT	TT	CT	TT	CT	TT	CT	CT	TT	TT	TT	CT	CT	TT	CT	CT	TT	CT	TT	TT	TT	TT	CT	TT	TT	CT	CT
contig23345_204	C	A	CC	CC	AC	CC	CC	AC	CC	AC	CC	AC	AC	CC	AC	AC	AC	CC	CC	AC	AC	CC	AC	AC	AC	AC	CC	AC	CC	CC	AC	AC	CC	CC	CC	CC	CC	AC	CC	AC	AC	AC	CC	AC	AC	CC	CC	AC	AC
contig23345_151	T	A	TT	TT	AT	TT	TT	AT	TT	AT	TT	AT	AT	TT	AT	AT	AT	TT	TT	AT	AT	TT	AT	AT	AT	AT	TT	AT	TT	TT	AT	AT	TT	TT	TT	TT	TT	AT	TT	AT	AT	AT	TT	AT	AT	TT	TT	AT	AT
contig68869_143	A	T	TT	TA	AA	TT	TT	AA	TT	TA	AA	TA	TA	TT	TA	AA	TA	TT	TA	TA	TA	TT	AA	TA	AA	TA	TT	TA	TA	TA	TA	TA	TT	TA	TA	TT	TA	AA	TT	AA	TT	TA	TT	TA	AA	AA	AA	AA	AA
contig68869_167	C	T	TT	TC	CC	TT	TT	CC	TT	TC	CC	TC	TC	TT	TC	CC	TC	TT	TC	TC	TC	TT	CC	TC	CC	TC	CC	TC	TC	TC	TC	TC	TT	TC	TC	TT	TC	CC	TT	CC	TT	TC	TT	TC	CC	CC	CC	CC	CC
contig472423_39	C	T	CC	TC	TC	CC	CC	TC	CC	CC	TC	CC	CC	CC	CC	TC	CC	CC	TC	CC	CC	CC	TC	CC	TC	CC	TC	CC	TC	TC	CC	CC	CC	TC	TC	CC	TC	TC	CC	TC	CC	CC	CC	CC	TC	CC	CC	TC	TC
contig68869_149	T	C	CC	CT	TT	CC	CC	TT	CC	CT	TT	CT	CT	CC	CT	TT	CT	CC	CT	CT	CT	CC	TT	CT	TT	CT	CC	CT	CT	CT	CT	CT	CC	CT	CT	CC	CT	TT	CC	TT	CT	CT	CC	CT	TT	TT	TT	TT	TT
contig68869_85	C	T	TC	TC	TC	CC	TC	CC	CC	CC	TC	CC	CC	CC	CC	TC	CC	CC	TC	CC	CC	TC	TC	CC	TC	CC	TC	CC	TC	TC	CC	CC	CC	TC	TC	CC	TC	TC	CC	TC	CC	CC	CC	CC	TC	CC	CC	TC	TC
contig68869_227	A	G	AA	GA	AA	GG	GA	GA	GG	GA	AA	GA	GA	GG	GA	AA	GA	GG	GA	GA	GA	GA	AA	GA	AA	GA	AA	GA	GA	GA	GA	GA	GG	GA	GA	GG	GA	AA	GG	AA	GG	GA	GG	GA	AA	AA	AA	AA	AA
contig68869_177	G	A	GG	AG	GG	AA	AG	AG	AA	AG	GG	AG	AG	AA	AG	GG	AG	AA	AG	AG	AG	AG	GG	AG	GG	AG	GG	AG	AG	AG	AG	AG	AA	AG	AG	AA	AG	GG	AA	GG	AA	AG	AA	AG	GG	GG	GG	GG	GG
contig68869_164	T	A	TT	AT	TT	AA	AT	AT	AA	AT	TT	AT	AT	AA	AT	TT	AT	AA	AT	AT	AT	AT	TT	AT	TT	AT	TT	AT	AT	AT	AT	AT	AA	AT	AT	AA	AT	TT	AA	TT	AA	AT	AA	AT	TT	TT	TT	TT	TT
contig68869_163	T	C	TT	CT	TT	CC	CT	CT	CC	CT	TT	CT	CT	CC	CT	TT	CT	CC	CT	CT	CT	CT	TT	CT	TT	CT	CT	CT	CT	CT	CT	CT	CC	CT	CT	CC	CT	TT	CC	TT	CT	CT	CC	CT	TT	TT	TT	TT	TT
contig720849_120	C	T	TC	TC	TC	CC	TC	CC	CC	CC	TC	CC	CC	CC	CC	TC	CC	CC	TC	CC	CC	TC	TC	CC	TC	CC	TC	CC	TC	TC	CC	CC	CC	TC	TC	CC	TC	TC	CC	TC	CC	CC	CC	CC	TC	CC	CC	TC	TC
contig23345_176	C	A	CC	AC	CC	AA	AC	AC	AA	AC	CC	AC	AC	AA	AC	CC	AC	AA	AC	AC	AC	AC	CC	AC	CC	AC	AC	AC	AC	AC	AC	AC	AA	AC	AC	AA	AC	CC	AA	CC	AC	AC	AA	AC	AC	CC	CC	CC	CC
contig68869_16	G	A	AG	AG	AG	GG	AG	GG	GG	GG	AG	GG	GG	GG	GG	AG	GG	GG	AG	GG	GG	AG	AG	GG	AG	GG	AG	GG	AG	AG	GG	GG	GG	AG	AG	GG	AG	AG	GG	AG	GG	GG	GG	GG	AG	GG	GG	AG	AG
contig472423_162	A	T	TA	TA	TA	AA	TA	AA	AA	AA	TA	AA	AA	AA	AA	TA	AA	AA	TA	AA	AA	TA	TA	AA	TA	AA	TA	AA	TA	TA	AA	AA	AA	TA	TA	AA	TA	TA	AA	TA	AA	AA	AA	AA	TA	AA	AA	TA	TA
contig23345_140	G	A	GG	AG	GG	AA	AG	AG	AA	AG	GG	AG	AG	AA	AA	GG	AG	AA	AG	AG	AG	AG	GG	AA	GG	AA	AG	AG	AG	GG	AG	AG	AA	AG	AG	AA	AG	GG	AA	GG	AG	AG	AA	AG	AG	GG	GG	GG	GG
contig720849_172	G	T	TG	TG	TG	GG	TG	GG	GG	GG	TG	GG	GG	GG	GG	TG	GG	GG	TG	GG	GG	TG	TG	GG	TG	GG	TG	GG	TG	TG	GG	GG	GG	TG	TG	GG	TG	TG	GG	TG	GG	GG	GG	GG	TG	GG	GG	TG	TG
contig720849_149	A	G	GA	GA	GA	AA	GA	AA	AA	AA	GA	AA	AA	AA	AA	GA	AA	AA	GA	AA	AA	GA	GA	AA	GA	AA	GA	AA	GA	GA	AA	AA	AA	GA	GA	AA	GA	GA	AA	GA	AA	AA	AA	AA	GA	AA	AA	GA	GA
contig23345_118	A	G	GG	GA	GA	AA	GA	AA	AA	AA	GG	AA	AA	AA	AA	GA	AA	AA	GA	AA	AA	GA	GA	AA	GA	AA	GA	AA	GA	GA	AA	AA	AA	GA	GA	AA	GA	GA	AA	GA	AA	AA	AA	AA	GA	GG	GG	GA	GA
contig23345_109	G	A	GG	AG	GG	AA	AG	AG	AA	AG	GG	AG	AG	AA	AA	GG	AG	AA	AG	AG	AG	AG	GG	AA	GG	AA	AG	AG	AG	GG	AG	AG	AA	AG	AG	AA	AG	GG	AA	GG	AG	AG	AA	AG	AG	GG	GG	GG	GG
contig23345_184	A	G	AA	GA	AA	GG	GA	GA	GG	GA	AA	GA	GA	GG	GG	AA	GA	GG	GA	GA	GA	GA	AA	GG	AA	GG	GA	GA	GA	AA	GA	GA	GG	GA	GA	GG	GA	AA	GG	AA	GA	GA	GG	GA	GA	AA	AA	AA	AA
contig23345_145	G	T	GG	TG	GG	TT	TG	TG	TT	TG	GG	TG	TG	TT	TT	GG	TG	TT	TG	TG	TG	TG	GG	TT	GG	TT	TG	TG	TG	GG	TG	TG	TT	TG	TG	TT	TG	GG	TT	GG	TG	TG	TT	TG	TG	GG	GG	GG	GG
contig23345_166	A	G	AA	GA	AA	GG	GA	GA	GG	GA	AA	GA	GA	GG	GG	AA	GA	GG	GA	GA	GA	GA	AA	GG	AA	GG	GA	GA	GA	AA	GA	GA	GG	GA	GA	GG	GA	AA	GG	AA	GA	GA	GG	GA	GA	AA	AA	AA	AA
contig293882_94	T	C	CT	CT	CT	TT	CT	TT	TT	TT	CT	TT	TT	TT	TT	CT	TT	TT	CT	TT	TT	CT	CT	TT	CT	TT	CT	TT	CT	CT	TT	TT	TT	CT	CT	TT	CT	CT	TT	CT	TT	TT	TT	TT	CT	CT	CT	CT	CT
contig13817_105	G	T	GG	GG	TG	GG	GG	TG	GG	TG	TG	TG	TG	GG	TG	TG	TG	GG	GG	TG	TG	GG	TG	GG	TG	TG	GG	TG	GG	GG	TG	TG	GG	GG	GG	GG	GG	TG	GG	TG	TG	TG	GG	TG	TG	TG	TG	TG	TG
contig293882_93	T	G	GT	GT	GT	TT	GT	TT	TT	TT	GT	TT	TT	TT	TT	GT	TT	TT	GT	TT	TT	GT	GT	TT	GT	TT	GT	TT	GT	GT	TT	TT	TT	GT	GT	TT	GT	GT	TT	GT	TT	TT	TT	TT	GT	GT	GT	GT	GT
contig815570_170	A	G	AA	AA	AA	GA	AA	GA	GA	GA	AA	GA	GA	GA	GA	AA	GA	GA	AA	GA	GA	AA	AA	GA	AA	GA	AA	GA	AA	AA	GA	GA	GA	AA	AA	GA	AA	AA	GA	AA	GA	GA	GA	GA	AA	AA	AA	AA	AA
contig774955_186	G	C	GG	GG	GG	CG	GG	CG	CG	CG	GG	CG	CG	CG	CG	GG	CG	CG	GG	CG	CG	GG	GG	CG	GG	CG	GG	CG	GG	GG	CG	CG	CG	GG	GG	CG	GG	GG	CG	GG	CG	CG	CG	CG	GG	GG	GG	GG	GG
contig774955_2	A	G	AA	AA	AA	GA	AA	GA	GA	GA	AA	GA	GA	GA	GA	AA	GA	GA	AA	GA	GA	AA	AA	GA	AA	GA	AA	GA	AA	AA	GA	GA	GA	AA	AA	GA	AA	AA	GA	AA	GA	GA	GA	GA	AA	AA	AA	AA	AA
contig774955_56	C	T	TC	TC	TC	CC	TC	CC	CC	CC	TC	CC	CC	CC	CC	TC	CC	CC	TC	CC	CC	TC	TC	CC	TC	CC	TC	CC	TC	TC	CC	CC	CC	TC	TC	CC	TC	TC	CC	TC	CC	CC	CC	CC	TC	TC	TC	CC	TC
contig774955_67	A	G	AA	AA	AA	GA	AA	GA	GA	GA	AA	GA	GA	GA	GA	AA	GA	GA	AA	GA	GA	AA	AA	GA	AA	GA	AA	GA	AA	AA	GA	GA	GA	AA	AA	GA	AA	AA	GA	AA	GA	GA	GA	GA	AA	AA	AA	GA	AA
contig13817_93	T	A	TT	TT	TT	AT	TT	AT	AT	AT	TT	AT	AT	AT	AT	TT	AT	AT	TT	AT	AT	TT	TT	AT	TT	AT	TT	AT	TT	TT	AT	AT	AT	TT	TT	AT	TT	TT	AT	TT	AT	AT	AT	AT	TT	TT	TT	AT	TT
contig13817_11	A	T	TT	TT	TA	TA	TT	AA	TA	AA	TA	AA	AA	TA	AA	TA	AA	TA	TT	AA	AA	TT	TA	AA	TA	AA	TT	AA	TT	TT	AA	AA	TA	TT	TT	AA	TT	TA	TA	TA	AA	AA	TA	AA	TA	TA	AA	AA	TA
contig13817_6	C	T	CC	CC	TC	CC	CC	TC	CC	TC	TC	TC	TC	CC	TC	TC	TC	CC	CC	TC	TC	CC	TC	TC	TC	TC	CC	TC	CC	CC	TC	TC	CC	CC	CC	CC	CC	TC	CC	TC	TC	TC	CC	TC	TC	TC	CC	CC	TC
contig383171_112	G	A	GG	GG	GG	AG	GG	AG	AG	GG	GG	AG	AG	AG	AG	GG	AG	AG	GG	AG	AG	GG	GG	AA	GG	AA	GG	AG	GG	GG	AG	GG	AG	GG	GG	AG	GG	GG	AG	GG	AG	AG	AG	AG	GG	GG	GG	AG	GG
contig383171_51	A	C	AA	AA	AA	CA	AA	CA	CA	AA	AA	CA	CA	CA	CA	AA	CA	CA	AA	CA	CA	AA	AA	CC	AA	CC	AA	CA	AA	AA	CA	AA	CA	AA	AA	CA	AA	AA	CA	AA	CA	CA	CA	CA	AA	AA	AA	CA	AA
contig383171_87	C	T	TC	TC	TT	CC	TC	TC	CC	TT	TT	TC	TC	CC	TC	TT	TC	CC	TC	TC	TC	TC	TT	CC	TT	CC	TC	TC	TC	TC	TC	TT	CC	TC	TC	CC	TC	TT	CC	TT	TC	TC	CC	TC	TT	TC	TT	TC	TT
contig31619_187	G	A	AG	AG	AG	GG	AG	GG	GG	GG	AG	GG	GG	GG	GG	AG	GG	GG	AG	GG	GG	AG	AG	GG	AG	GG	AG	GG	AG	AG	GG	AG	GG	AG	AG	GG	AG	AG	GG	AG	GG	GG	GG	GG	AG	AG	AG	GG	AG
contig31619_196	A	T	TA	TA	AA	TT	TA	TA	TT	TA	AA	TA	TA	TT	TA	AA	TA	TT	TA	TA	TA	TA	AA	TA	AA	TA	TA	TA	TA	TA	TT	AA	TT	TA	TA	TT	TA	AA	TT	AA	TT	TA	TT	TA	AA	AA	AA	TT	AA
contig31619_206	C	T	CC	CC	CC	TC	CC	TC	TC	TC	CC	TC	TC	TC	TC	CC	TC	TC	CC	TC	TC	CC	CC	TC	CC	TC	CC	TC	CC	CC	TC	CC	TC	CC	CC	TC	CC	CC	TC	CC	TT	TC	TC	TC	CC	CC	CC	TT	CC
contig31619_21	G	A	GG	GG	GG	AG	GG	AG	AG	AG	GG	AG	AG	AG	AG	GG	AG	AG	GG	AG	AG	GG	GG	AG	GG	AG	GG	AG	GG	GG	AG	GG	AG	GG	GG	AG	GG	GG	AG	GG	AA	AG	AG	AG	GG	GG	GG	AA	GG
contig33326_11	G	T	TG	TG	TG	GG	TG	GG	GG	GG	TG	GG	GG	GG	GG	TG	GG	GG	TG	GG	GG	TG	TG	GG	TG	GG	TG	GG	TG	TG	GG	TG	GG	TG	TG	GG	TG	TG	GG	TG	GG	GG	GG	GG	TG	TG	TG	TG	TG
contig344406_28	A	T	AA	AA	AA	TA	AA	TA	TA	TA	AA	TA	TA	TA	TA	AA	TA	TA	AA	TA	TA	AA	AA	TA	AA	TA	AA	TA	AA	AA	TA	AA	TA	AA	AA	TA	AA	AA	TA	AA	TA	TA	TA	TA	AA	AA	AA	TA	AA
contig580308_16	T	C	TT	TT	TT	CT	TT	CT	CT	CT	TT	CT	CT	CT	CT	TT	CT	CT	TT	CT	CT	TT	TT	CT	TT	CT	TT	CT	TT	TT	CT	TT	CT	TT	TT	CT	TT	TT	CT	TT	CT	CT	CT	CT	TT	TT	TT	CT	TT
contig834881_179	A	G	GA	GA	AA	GG	GA	GA	GG	GA	AA	GA	GA	GG	GG	AA	GA	GG	GA	GA	GA	AA	AA	GA	AA	GA	GA	GA	GA	GA	GA	AA	GG	GA	GA	GG	GA	AA	GG	AA	GA	GA	GG	GA	GA	GA	GA	GA	AA
contig580308_14	G	A	AG	AG	AG	GG	AG	GG	GG	GG	AG	GG	GG	GG	GG	AG	GG	GG	AG	GG	GG	AG	AG	GG	AG	GG	AG	GG	AG	AG	GG	AG	GG	AG	AG	GG	AG	AG	GG	AG	GG	GG	GG	GG	AG	AG	AG	AG	AG
contig580308_24	T	C	CT	CT	CT	TT	CT	TT	TT	TT	CT	TT	TT	TT	TT	CT	TT	TT	CT	TT	TT	CT	CT	TT	CT	TT	CT	TT	CT	CT	TT	CT	TT	CT	CT	TT	CT	CT	TT	CT	TT	TT	TT	TT	CT	CT	CT	CT	CT
contig6292_152	G	C	GG	GG	GG	CG	GG	CG	CG	CG	GG	CG	CG	CG	CG	GG	CG	CG	GG	CG	CG	GG	GG	CG	GG	CG	GG	CG	GG	GG	CG	GG	CG	GG	GG	CG	GG	GG	CG	GG	CG	CG	CG	CG	GG	GG	GG	CG	GG
contig23916_191	A	G	GA	GA	GA	AA	GA	AA	AA	AA	GA	AA	AA	AA	AA	GA	AA	AA	GA	AA	AA	GA	GA	AA	GA	AA	GA	AA	GA	GA	AA	GA	AA	GA	GA	AA	GA	GA	AA	GA	AA	AA	AA	AA	GA	GA	GA	GA	GA
contig23916_147	A	G	GA	GA	GA	AA	GA	AA	AA	AA	GA	AA	AA	AA	AA	GA	AA	AA	GA	AA	AA	GA	GA	AA	GA	AA	GA	AA	GA	GA	AA	GA	AA	GA	GA	AA	GA	GA	AA	GA	AA	AA	AA	AA	GA	GA	GA	GA	GA
contig344406_17	A	T	AA	AA	AA	TA	AA	TA	TA	TA	AA	TA	TA	TA	TA	AA	TA	TA	AA	TA	TA	AA	AA	TA	AA	TA	AA	TA	AA	AA	TA	AA	TA	AA	AA	TA	AA	AA	TA	AA	TA	TA	TA	TA	AA	AA	AA	TA	AA
contig617952_62	C	A	CC	CC	CC	AC	CC	AC	AC	AC	CC	AC	AC	AC	AC	CC	AC	AC	CC	AC	AC	CC	CC	AC	CC	AC	CC	AC	CC	CC	AC	CC	AC	CC	CC	AC	CC	CC	AC	CC	AC	AC	AC	AC	CC	CC	CC	CC	CC
contig484024_71	C	A	AC	AC	AC	CC	AC	CC	CC	CC	AC	CC	CC	CC	CC	AC	CC	CC	AC	CC	CC	AC	AC	CC	AC	CC	AC	CC	AC	AC	CC	AC	CC	AC	AC	CC	AC	AC	CC	AC	CC	CC	CC	CC	AC	AC	AA	AC	AC
contig59606_36	T	G	TT	TT	GT	GT	TT	GG	GT	GG	GT	GG	GG	GT	GG	GT	GG	GT	TT	GG	GG	TT	GT	GG	GT	GG	TT	GG	TT	TT	GG	GT	GT	TT	TT	GG	TT	GT	GT	GT	GG	GG	GT	GG	GT	GT	TT	GT	GT
contig568094_44	C	T	TC	TC	TC	CC	TC	CC	CC	CC	TC	CC	CC	CC	CC	TC	CC	CC	TC	CC	CC	TC	TC	CC	TC	CC	TC	CC	TC	TC	CC	TC	CC	TC	TC	CC	TC	TC	CC	TC	CC	CC	CC	CC	TC	TC	TC	TC	TC
contig206777_98	C	T	TC	TC	TC	CC	TC	CC	CC	CC	TC	CC	CC	CC	CC	TC	CC	CC	TC	CC	CC	TC	TC	CC	TC	CC	TC	CC	TC	TC	CC	TC	CC	TC	TC	CC	TC	TC	CC	TC	CC	CC	CC	CC	TC	TC	TC	TC	TC
contig59606_39	G	T	GG	GG	TG	TG	GG	TT	TG	TT	TG	TT	TT	TG	TT	TG	TT	TG	GG	TT	TT	GG	TG	TT	TG	TT	GG	TT	GG	GG	TT	TG	TG	GG	GG	TT	GG	TG	TG	TG	TT	TT	TG	TT	TG	TG	GG	TG	TG
contig39271_191	C	T	TC	TC	TC	CC	TT	CC	CC	CC	TC	CC	CC	CC	CC	TC	CC	CC	TC	CC	CC	TC	TC	CC	TC	CC	TC	CC	TC	TC	CC	TC	CC	TC	TC	CC	TC	TC	CC	TC	CC	CC	CC	CC	TC	TC	TC	CC	TC
contig568094_5	C	A	AC	AC	AC	CC	AC	CC	CC	CC	AC	CC	CC	CC	CC	AC	CC	CC	AC	CC	CC	AC	AC	CC	AC	CC	AC	CC	AC	AC	CC	AC	CC	AC	AC	CC	AC	AC	CC	AC	CC	CC	CC	CC	AC	AC	AC	AC	AC
contig39271_2	C	G	GC	GC	GC	CC	GG	CC	CC	CC	GC	CC	CC	CC	CC	GC	CC	CC	GC	CC	CC	GC	GC	CC	GC	CC	GC	CC	GC	GC	CC	GC	CC	GC	GC	CC	GC	GC	CC	GC	CC	CC	CC	CC	GC	GC	GC	CC	GC
contig833960_38	A	G	AA	AA	AA	GA	AA	GA	GA	GA	AA	GA	GA	GA	GA	AA	GA	GA	AA	GA	GA	AA	AA	GA	AA	GA	AA	GA	AA	AA	GA	AA	GA	AA	AA	GA	AA	AA	GA	AA	GA	GA	GA	GA	AA	AA	GG	GA	AA
contig554988_50	G	A	GG	GG	GG	AG	GG	AG	AG	AG	GG	AG	AG	AG	AG	GG	AG	AG	GG	AG	AG	GG	GG	AG	GG	GG	GG	AG	GG	GG	AG	GG	AG	GG	GG	AG	GG	GG	AG	GG	AG	AG	AG	AG	GG	GG	GG	AG	GG
contig554988_154	A	G	AA	AA	AA	GA	AA	GA	GA	GA	AA	GA	GA	GA	GA	AA	GA	GA	AA	GA	GA	AA	AA	GA	AA	AA	AA	GA	AA	AA	GA	AA	GA	AA	AA	GA	AA	AA	GA	AA	GA	GA	GA	GA	AA	AA	AA	GA	AA
contig39271_135	C	T	CC	CC	CC	TC	CC	TC	TC	TC	CC	TC	TC	TC	TC	CC	TC	TC	CC	TC	TC	CC	CC	TC	CC	TC	CC	TC	CC	CC	TC	CC	TC	CC	CC	TC	CC	CC	TC	CC	TC	TC	TC	TC	CC	CC	CC	TC	CC
contig815570_108	C	A	AC	AC	CC	CC	AC	CC	AC	CC	CC	CC	CC	AC	CC	CC	CC	AC	AC	CC	CC	AC	CC	CC	CC	CC	AC	CC	AC	AC	CC	CC	AC	AC	AC	AC	AC	CC	AC	CC	CC	CC	AC	CC	AC	AC	CC	CC	CC
contig780631_12	G	A	AG	AG	AG	GG	AG	GG	GG	GG	AG	GG	GG	GG	GG	AG	GG	GG	AG	GG	GG	AG	AG	GG	AG	GG	AG	GG	AG	AG	GG	AG	GG	AG	AG	GG	AG	AG	GG	AG	GG	GG	GG	GG	AG	AG	AG	AG	AG
contig276401_27	C	T	CC	CC	CC	TC	CC	TC	TC	TC	CC	TC	TC	TC	TC	CC	TC	TC	CC	TC	TC	CC	CC	TC	CC	TC	CC	TC	CC	CC	TC	CC	TC	CC	CC	TC	CC	CC	TC	CC	TC	TC	TC	TC	CC	CC	TC	TC	CC
contig815570_79	T	A	AT	AT	TT	AT	AT	TT	AT	TT	TT	TT	TT	AT	TT	TT	TT	AT	AT	TT	TT	AT	TT	TT	TT	TT	AT	TT	AT	AT	TT	TT	AT	AT	AT	AT	AT	TT	AT	TT	TT	TT	AT	TT	AT	AT	AT	TT	TT
contig55643_52	G	C	GG	GG	GG	CG	GG	CG	CG	CG	GG	CG	CG	CG	CG	GG	CG	CG	GG	CG	CG	GG	GG	CG	GG	CG	GG	CG	GG	GG	CG	GG	CG	GG	GG	CG	GG	GG	CG	GG	CG	CG	CG	CG	GG	GG	GG	CG	GG
contig206777_37	A	T	AA	AA	TA	AA	AA	TA	AA	TA	TA	TA	TA	AA	TA	TA	TA	AA	AA	TA	TA	AA	TA	TA	TA	TA	AA	TA	AA	AA	TA	TA	AA	AA	AA	AA	AA	TA	AA	TA	TA	TA	AA	TA	AA	AA	AA	TA	TA
contig39271_189	T	C	CT	CT	TT	CT	TT	TT	CT	TT	TT	TT	TT	CT	TT	TT	TT	CT	CT	TT	TT	CT	TT	TT	TT	TT	CT	TT	CT	CT	TT	TT	CT	CT	CT	CT	CT	TT	CT	TT	TT	TT	CT	TT	CT	CT	CT	TT	TT
contig42901_126	A	C	CA	CA	CA	AA	CA	AA	AA	AA	CA	AA	AA	AA	AA	CA	AA	AA	CA	AA	AA	CA	CA	AA	CA	AA	CA	AA	CA	CA	AA	CA	AA	CA	CA	AA	CA	CA	AA	CA	AA	AA	AA	AA	CC	CA	CA	CA	CA
contig554988_9	G	A	AG	AG	GG	AG	AG	GG	AG	GG	GG	GG	GG	AG	GG	GG	GG	AG	AG	GG	GG	AG	GG	GG	GG	GG	AG	GG	AG	AG	GG	GG	AG	AG	AG	AG	AG	GG	AG	GG	GG	GG	AG	GG	AG	AG	AG	GG	GG
contig383171_100	C	T	TC	TC	CC	TC	TC	CC	TC	CC	CC	CC	CC	TC	CC	CC	CC	TC	TC	CC	CC	TC	CC	CC	CC	CC	TC	CC	TC	TC	CC	CC	TC	TC	TC	TC	TC	CC	TC	CC	CC	CC	TC	CC	TC	TC	TC	CC	CC
contig815570_109	G	T	TG	TG	GG	TG	TG	GG	TG	GG	GG	GG	GG	TG	GG	GG	GG	TG	TG	GG	GG	TG	GG	GG	GG	GG	TG	GG	TG	TG	GG	GG	TG	TG	TG	TG	TG	GG	TG	GG	GG	GG	TG	GG	TG	TG	TG	GG	GG
contig31619_61	A	G	AA	AA	GA	AA	AA	GA	AA	GA	GA	GA	GA	AA	GA	GA	GA	AA	AA	GA	GA	AA	GA	GA	GA	GA	AA	GA	AA	AA	GA	GA	AA	AA	AA	AA	AA	GA	AA	GA	AA	GA	AA	GA	AA	AA	AA	GA	GA
contig56292_59	A	G	GA	GA	AA	GA	GA	AA	GA	AA	AA	AA	AA	GA	AA	AA	AA	GA	GA	AA	AA	GA	AA	AA	AA	AA	GA	AA	GA	GA	AA	AA	GA	GA	GA	GA	GA	AA	GA	AA	AA	AA	GA	AA	GA	GA	GA	AA	AA
contig617952_194	T	C	TT	TT	CT	TT	TT	CT	TT	CT	CT	CT	CT	TT	CT	CT	CT	TT	TT	CT	CT	TT	CT	CT	CT	CT	TT	CT	TT	TT	CT	CT	TT	TT	TT	TT	TT	CT	TT	CT	CT	CT	TT	CT	TT	TT	TT	CT	CT
contig31619_34	C	G	CC	CC	GC	CC	CC	GC	CC	GC	GC	GC	GC	CC	GC	GC	GC	CC	CC	GC	GC	CC	GC	GC	GC	GC	CC	GC	CC	CC	GC	GC	CC	CC	CC	CC	CC	GC	CC	GC	CC	GC	CC	GC	GC	CC	CC	GC	GC
contig815570_145	T	C	TT	TT	CT	TT	TT	CT	TT	CT	CT	CT	CT	TT	CT	CT	CT	TT	TT	CT	CT	TT	CT	CT	CT	CT	TT	CT	TT	TT	CT	CT	TT	TT	TT	TT	TT	CT	TT	CT	CT	CT	TT	CT	CT	CT	TT	CT	CT
contig54386_111	C	T	CC	CC	TC	CC	CC	TC	CC	TC	TC	TC	TC	CC	TC	TC	TC	CC	CC	TT	TC	CC	TC	TC	TC	TC	CC	TC	CC	CC	TC	TC	CC	CC	CC	CC	CC	TC	CC	TC	TC	TC	CC	TC	TC	TC	TC	TC	TC
contig42901_96	C	G	GC	GC	GC	CC	GC	CC	CC	CC	GC	CC	CC	CC	CC	GC	CC	CC	GC	CC	CC	GC	GC	CC	GC	CC	GC	GG	GC	GC	CC	GC	CC	GC	GC	CC	GC	GC	CC	GC	CC	CC	CC	CC	GG	GC	GC	GC	GC
contig42901_106	T	A	AT	AT	AT	TT	AT	TT	TT	TT	AT	TT	TT	TT	TT	AT	TT	TT	AT	TT	TT	AT	AT	TT	AT	TT	AT	AA	AT	AT	TT	AT	TT	AT	AT	TT	AT	AT	TT	AT	TT	TT	TT	TT	AA	AT	AT	AT	AT
contig54386_116	C	T	CC	CC	TC	CC	CC	TC	CC	TC	TC	TC	TC	CC	TC	TC	TC	CC	CC	TC	TC	CC	TC	TC	TC	TC	CC	TC	CC	CC	TC	TC	CC	CC	CC	CC	CC	TC	CC	TC	TC	TC	CC	TC	TC	TC	TC	TC	TC
contig833421_139	T	C	TT	TT	CT	TT	TT	CT	TT	CT	CT	CT	CT	TT	CT	CT	CT	TT	TT	CT	CT	TT	CT	CT	CT	CT	TT	CT	TT	TT	CT	CT	TT	TT	TT	TT	TT	CT	TT	CT	CT	CT	TT	CT	CT	CT	CT	CT	CT
contig833421_33	G	A	GG	GG	AG	GG	GG	AG	GG	AG	AG	AG	AG	GG	AG	AG	AG	GG	GG	AG	AG	GG	AG	AG	AG	AG	GG	AG	GG	GG	AG	AG	GG	GG	GG	GG	GG	AG	GG	AG	AG	AG	GG	AG	AG	AG	AG	AG	AG
contig33101_115	G	T	TG	TG	TG	GG	TG	GG	GG	GG	TG	GG	GG	GG	GG	TG	GG	GG	TG	GG	GG	TG	TG	GG	TG	GG	TG	GG	TG	TG	GG	TG	GG	TG	TG	GG	TG	TG	GG	TG	GG	GG	GG	GG	TG	TG	TG	TG	TG
contig617952_94	G	C	GG	GG	CG	GG	GG	CG	GG	CG	CG	CG	CG	GG	CG	CG	CG	GG	GG	CG	CG	GG	CG	CG	CG	CG	GG	CG	GG	GG	CG	CG	GG	GG	GG	GG	GG	CG	GG	CG	CG	CG	GG	CG	CG	CG	CG	CG	CG
contig54386_105	G	C	GG	GG	CG	GG	GG	CG	GG	CG	CG	CG	CG	GG	CG	CG	CG	GG	GG	CG	CG	GG	CG	CG	CG	CG	GG	CG	GG	GG	CG	CG	GG	GG	GG	GG	GG	CG	GG	CG	CG	CG	GG	CG	CG	CG	CG	CG	CG
contig833421_35	G	A	GG	GG	AG	GG	GG	AG	GG	GG	AG	AG	AG	GG	AG	AG	AG	GG	GG	AG	AG	GG	AG	AG	AG	AG	GG	AG	GG	GG	AG	AG	GG	GG	GG	GG	GG	AG	GG	AG	AG	AG	GG	AG	AG	AG	AG	AG	AG
contig33101_17	G	A	AG	AG	AG	GG	AG	GG	GG	GG	AG	GG	GG	GG	GG	AG	GG	GG	AG	GG	GG	AG	AG	GG	AG	GG	AG	GG	AG	AG	GG	AG	GG	AG	AG	GG	AG	AG	GG	AG	GG	GG	GG	GG	AG	AG	AG	AG	AG
contig12932_126	A	T	AA	TA	TA	AA	AA	TA	AA	AA	TA	TA	TA	AA	TA	TA	TA	AA	TA	TA	TA	AA	TA	TA	TA	TA	AA	TA	AA	AA	TA	TA	AA	AA	AA	TA	TA	TA	AA	TA	TA	TA	AA	TA	TA	AA	TA	TA	AA
contig675580_148	C	T	CC	TC	TC	CC	CC	TC	CC	CC	TC	TC	TC	CC	TC	TC	TC	CC	TC	TC	TC	CC	TC	TC	TC	TC	CC	TC	CC	CC	TC	TC	CC	CC	CC	TC	TC	TC	CC	TC	TC	TC	CC	TC	TC	TC	TC	TC	CC
contig55643_159	G	A	GG	AG	AG	GG	GG	AG	GG	GG	AG	AG	AG	GG	AG	AG	AG	GG	AG	AG	AG	GG	AG	AG	AG	AG	GG	AG	GG	GG	AG	AG	GG	GG	GG	AG	AG	AG	GG	AG	AG	AG	GG	AG	AG	AG	AG	AG	GG
contig523019_112	T	C	CT	CT	CT	TT	CT	TT	TT	TT	CT	TT	TT	TT	TT	CT	TT	TT	CT	TT	TT	CT	CT	TT	CT	TT	CT	TT	CT	CT	TT	CT	TT	CT	CT	TT	CT	CT	TT	CT	TT	TT	TT	TT	CT	TT	TT	CT	CT
contig33101_8	T	C	CT	CT	CT	TT	CT	TT	TT	TT	CT	TT	TT	TT	TT	CT	TT	TT	CT	TT	TT	CT	CT	TT	CT	TT	CT	TT	CT	CT	TT	CT	TT	CT	CT	TT	CT	CT	TT	CT	TT	TT	TT	TT	CT	CC	TT	CT	CT
contig523019_64	C	T	CC	TC	TC	CC	CC	TC	CC	CC	TC	TC	TC	CC	TC	TC	TC	CC	TC	TC	TC	CC	TC	TC	TC	TC	CC	TC	CC	CC	TC	TC	CC	CC	CC	TC	TC	TC	CC	TC	TC	TC	CC	TC	TC	TC	TC	TC	CC
contig12932_162	G	C	GG	CG	CG	GG	GG	CC	GG	GG	CG	CG	CC	GG	CG	CG	CC	GG	CG	CG	CG	GG	CG	CG	CG	CG	GG	CG	GG	GG	CG	CG	GG	GG	GG	CG	CG	CG	GG	CG	CG	CG	GG	CG	CG	CC	CG	CC	GG
contig12932_144	A	G	GA	AA	AA	GA	GA	AA	GA	GA	AA	AA	AA	GA	AA	AA	AA	GA	AA	AA	AA	GA	AA	AA	AA	AA	GA	AA	GA	GA	AA	AA	GA	GA	GA	AA	AA	AA	GA	AA	AA	AA	GA	AA	AA	GA	AA	AA	GA
contig55643_247	C	T	CC	TC	TC	CC	CC	TC	CC	CC	TC	TC	TC	CC	TC	TC	TC	CC	TC	TC	TC	CC	TC	TC	TC	TC	CC	TC	CC	CC	TC	TC	CC	CC	CC	TC	TC	TC	CC	TC	TC	TC	CC	TC	TC	CC	CC	TC	CC
contig383171_83	G	C	CG	CG	GG	CC	CG	CG	CC	GG	GG	CG	CG	CC	CG	GG	CG	CC	CG	CG	CG	CG	GG	CC	GG	CC	CG	CG	CG	CG	CG	GG	CC	CG	CG	CG	CG	GG	CC	GG	CG	CG	CC	CG	GG	CG	CG	CG	GG
contig55643_229	A	T	TA	AA	AA	TT	TA	TA	TT	TT	AA	TA	TA	TT	TA	AA	TA	TT	AA	TA	TA	TA	AA	TA	AA	TA	TA	TA	TA	TA	TA	AA	TT	TA	TA	TA	AA	AA	TT	AA	TA	TA	TT	TA	AA	TA	TA	TA	TA
contig55643_206	A	C	CA	AA	AA	CC	CA	CA	CC	CC	AA	CA	CA	CC	CA	AA	CA	CC	AA	CA	CA	CA	AA	CA	AA	CA	CA	CA	CA	CA	CA	AA	CC	CA	CA	CA	AA	AA	CC	AA	CA	CA	CC	CA	AA	CA	CA	CA	CA
contig55643_232	A	C	CA	AA	AA	CC	CA	CA	CC	CC	AA	CA	CA	CC	CA	AA	CA	CC	AA	CA	CA	CA	AA	CA	AA	CA	CA	CA	CA	CA	CA	AA	CC	CA	CA	CA	AA	AA	CC	AA	CA	CA	CC	CA	AA	CA	CA	CA	CA
contig78646_33	A	G	GG	GA	GG	GA	GA	GG	GA	GA	GA	GA	GG	GA	AA	GG	GA	GA	GG	GG	GA	AA	GA	GA	GA	GA	GA	GG	GA	GG	GA	GA	GA	GG	GA	AA	GA	GA	GA	GA	GA	GA	GG	GA	GA	GA	GA	GA	AA
contig78646_116	C	T	TT	TC	TT	TC	TC	TT	TC	TC	TC	TC	TC	TC	CC	TT	TC	TC	TT	TT	TC	CC	TC	TC	TC	TC	TC	TT	TC	TT	TC	TC	TC	TT	TC	CC	TC	TC	TC	TC	TC	TC	TT	TC	TC	TC	TC	TC	CC
contig469_104	A	C	CA	CA	CA	CA	AA	CA	CA	CA	CA	AA	CA	AA	AA	CA	CA	AA	CA	CA	AA	CA	AA	AA	AA	CA	CA	CA	AA	CA	AA	AA	AA	CA	AA	AA	AA	AA	CA	AA	CA	AA	CA	AA	AA	CA	AA	AA	AA
contig469_200	G	A	AG	AG	AG	AG	GG	AG	AG	AG	AG	GG	AG	GG	GG	AG	AG	GG	AG	AG	GG	AG	GG	GG	GG	AG	AG	AG	GG	AG	GG	GG	GG	AG	GG	GG	GG	GG	AG	GG	AG	GG	AG	GG	GG	AG	GG	GG	GG
contig3286_194	G	A	AA	AG	AA	GG	GG	AA	AG	AG	GG	AG	AG	AG	GG	AA	AG	GG	AA	AA	GG	AG	GG	AG	GG	AG	AG	AG	GG	AA	GG	GG	GG	AA	AG	GG	GG	GG	GG	GG	GG	AG	AG	GG	AG	AG	AG	AG	GG
contig45545_179	T	C	CT	CC	CT	CT	CT	CT	CC	CC	CC	TT	TT	CC	CT	CT	CC	CT	CT	CT	CT	CC	CT	TT	CT	CC	CC	CC	CT	CT	CT	CT	CT	CT	TT	CT	CT	CT	CT	CT	CC	TT	CC	CT	TT	CC	TT	TT	CT
contig658660_14	A	C	CA	CC	CA	CA	CA	CA	CC	CC	CC	AA	AA	CC	CA	CA	CC	CA	CA	CA	CA	CC	CA	AA	CA	CC	CC	CC	CA	CA	CA	CA	CA	CA	AA	CA	CA	CA	CC	CA	CC	AA	CC	CA	AA	CC	CA	AA	CA
contig2785_190	T	A	AT	TT	AT	AT	AT	AT	TT	TT	TT	AA	AT	TT	AT	AT	TT	AT	AT	AT	AT	TT	AT	AA	AT	TT	TT	AT	AT	AT	AT	AT	AT	AT	AA	AT	AT	AA	TT	AT	TT	AA	AT	AT	AT	AT	AT	AT	AT
contig33850_150	G	A	AG	GG	AG	GG	GG	AG	GG	GG	GG	AG	AG	GG	GG	AG	GG	GG	AG	AG	GG	GG	GG	AG	GG	GG	GG	GG	GG	AG	GG	GG	GG	AG	AG	GG	GG	GG	GG	GG	GG	AG	AG	GG	GG	AG	GG	GG	GG
contig38211_94	C	T	TC	CC	TC	CC	CC	TC	CC	CC	CC	TC	TC	CC	CC	TC	CC	CC	TC	TC	CC	CC	CC	TC	CC	CC	CC	CC	CC	TC	CC	CC	CC	TC	TC	CC	CC	CC	CC	CC	CC	TC	TC	CC	CC	TC	TC	CC	CC
contig978544_61	G	A	GG	AG	GG	AG	AG	GG	AG	AG	AG	GG	GG	AG	AG	GG	AG	AG	GG	GG	AG	AG	AG	GG	AG	AG	AG	AG	AG	GG	AG	AG	AG	GG	GG	AG	AG	AG	AG	AG	AG	GG	AG	AG	AG	AG	AG	AG	AG
contig33850_178	C	A	AC	CC	AC	CC	CC	AC	CC	CC	CC	AC	AC	CC	CC	AC	CC	CC	AC	AC	CC	CC	CC	AC	CC	CC	CC	CC	CC	AC	CC	CC	CC	AC	AC	CC	CC	CC	CC	CC	CC	AC	AC	CC	CC	AC	CC	CC	CC
contig33850_145	G	A	GG	AG	GG	AG	AG	GG	GG	AG	AG	GG	GG	AG	AG	GG	AG	AG	GG	GG	AG	AG	AG	GG	AG	AG	AG	AG	AG	GG	AG	AG	AG	GG	GG	AG	AG	AG	AG	AG	AG	GG	GG	AG	AG	GG	AG	AG	AG
contig28319_239	C	T	CC	TC	CC	TC	CC	CC	TC	TC	TC	CC	CC	TT	TC	CC	TT	TC	CC	CC	TC	TC	TC	CC	TC	TC	TT	TC	TC	CC	CC	TC	TC	CC	CC	TC	TC	TC	TC	TC	TC	CC	CC	TC	TC	CC	TC	TC	TC
contig3286_63	T	C	CT	TT	CT	TT	TT	CT	TT	TT	TT	CT	CT	TT	TT	CT	TT	TT	CT	CT	TT	TT	TT	CT	TT	TT	TT	TT	TT	CT	TT	TT	TT	CT	CT	TT	TT	TT	TT	TT	TT	CT	TT	TT	TT	CT	CT	CT	TT
contig41284_202	A	G	AA	GA	AA	GA	GA	AA	GA	GA	GA	AA	AA	GA	GA	AA	GA	GA	AA	AA	GA	GA	GA	AA	GA	GA	GA	GA	GA	AA	GA	GA	GA	AA	AA	GA	GA	GA	GA	GA	GA	AA	GA	GA	GA	AA	GA	GA	GA
contig33850_70	G	A	GG	AG	GG	AG	AG	GG	GG	AG	AG	GG	GG	AG	AG	GG	AG	AG	GG	GG	AG	AG	AG	GG	AG	AG	AG	AG	AG	GG	AG	AG	AG	GG	GG	AG	AG	AG	AG	AG	AG	GG	GG	AG	AG	GG	GG	GG	AG
contig45545_230	G	A	AG	GG	AG	GG	GG	AG	GG	GG	GG	AG	AG	GG	GG	AG	GG	GG	AG	AG	GG	GG	GG	AG	GG	GG	GG	GG	GG	AG	GG	GG	GG	AG	AG	GG	GG	GG	GG	GG	GG	AG	GG	GG	GG	AG	AG	AG	GG
contig41284_203	T	C	CC	CT	CC	TT	TT	CC	CT	CT	CT	CT	CT	CT	TT	CC	CT	TT	CC	CC	TT	CT	TT	CT	TT	CT	CT	CT	TT	CC	TT	TT	TT	CC	CT	TT	TT	TT	TT	TT	CT	CT	CT	TT	TT	CC	CC	CC	TT
contig45545_223	G	A	AG	GG	AG	GG	GG	AG	GG	GG	GG	AG	AG	GG	GG	AG	GG	GG	AG	AG	GG	GG	GG	AG	GG	GG	GG	GG	GG	AG	GG	GG	GG	AG	AG	GG	GG	GG	GG	GG	GG	AG	GG	GG	GG	AG	AG	AG	GG
contig45545_222	C	T	CC	TC	CC	TC	TC	CC	TC	TC	TC	CC	CC	TC	TC	CC	TC	TC	CC	CC	TC	TC	TC	CC	TC	TC	TC	TC	TC	CC	TC	TC	TC	CC	CC	TC	TC	TC	TC	TC	TC	CC	TC	TC	TC	CC	CC	CC	TC
contig3286_236	A	T	TA	AA	TA	AA	AA	TA	AA	AA	AA	TA	TA	AA	AA	TA	AA	AA	TA	TA	AA	AA	AA	TA	AA	AA	AA	AA	AA	TA	AA	AA	AA	TA	TA	AA	AA	AA	AA	AA	AA	TA	AA	AA	AA	TA	TA	TA	AA
contig45545_227	G	A	AG	GG	AG	GG	GG	AG	GG	GG	GG	AG	AG	GG	GG	AG	GG	GG	AG	AG	GG	GG	GG	AG	GG	GG	GG	GG	GG	AG	GG	GG	GG	AG	AG	GG	GG	GG	GG	GG	GG	AG	GG	GG	GG	AG	AG	AG	GG
contig41284_135	A	G	GA	AA	GA	AA	AA	GA	AA	AA	AA	GA	GA	AA	AA	GA	AA	AA	GA	GA	AA	AA	AA	GA	AA	AA	AA	AA	AA	GA	AA	AA	AA	GA	GA	AA	AA	AA	AA	AA	AA	GA	AA	AA	AA	GA	GA	GA	AA
contig3286_227	A	C	CA	AA	CA	AA	AA	CA	AA	AA	AA	CA	CA	AA	AA	CA	AA	AA	CA	CA	AA	AA	AA	CA	AA	AA	AA	AA	AA	CA	AA	AA	AA	CA	CA	AA	AA	AA	AA	AA	AA	CA	AA	AA	AA	CA	CA	CA	AA
contig3286_234	T	G	GT	TT	GT	TT	TT	GT	TT	TT	TT	GT	GT	TT	TT	GT	TT	TT	GT	GT	TT	TT	TT	GT	TT	TT	TT	TT	TT	GT	TT	TT	TT	GT	GT	TT	TT	TT	TT	TT	TT	GT	TT	TT	TT	GT	GT	GT	TT
contig3286_220	C	A	AC	CC	AC	CC	CC	AC	CC	CC	CC	AC	AC	CC	CC	AC	CC	CC	AC	AC	CC	CC	CC	AC	CC	CC	CC	CC	CC	AC	CC	CC	CC	AC	AC	CC	CC	CC	CC	CC	CC	AC	CC	CC	CC	AC	AC	AC	CC
contig31606_186	T	C	CT	TT	CT	TT	TT	CT	TT	TT	TT	CT	CT	TT	TT	CT	TT	TT	CT	CT	TT	TT	TT	CT	TT	TT	TT	TT	TT	CT	TT	TT	TT	CT	CT	TT	TT	TT	TT	TT	TT	CT	TT	TT	CT	CT	CT	CT	TT
contig68905_167	T	C	CC	CC	CC	TT	TT	CC	CC	CC	CT	CT	CC	CT	TT	CC	CT	TT	CC	CC	TT	CT	TT	CT	TT	CT	CT	CC	TT	CC	TT	TT	TT	CC	CT	TT	TT	TT	CT	TT	CT	CT	CC	TT	TT	CC	CC	CT	TT
contig54531_108	G	T	GG	GG	GG	TG	TG	GG	GG	GG	GG	TG	GG	GG	TG	GG	GG	TG	GG	GG	TG	GG	TG	TG	TG	GG	GG	GG	TG	GG	TG	TG	TG	GG	TG	TG	TG	TG	GG	TG	GG	TG	GG	TG	TG	GG	GG	TG	TG
contig54531_141	C	T	CC	CC	CC	TC	TC	CC	CC	CC	CC	TC	CC	CC	TC	CC	CC	TC	CC	CC	TC	CC	TC	TC	TC	CC	CC	CC	TC	CC	TC	TC	TC	CC	TC	TC	TC	TC	CC	TC	CC	TC	CC	TC	TC	CC	CC	TC	TC
contig54531_78	G	A	AG	AG	AG	GG	GG	AG	AG	AG	AG	GG	AG	AG	GG	AG	AG	GG	AG	AG	GG	AG	GG	GG	GG	AG	AG	AG	GG	AG	GG	GG	GG	AG	GG	GG	GG	GG	AG	GG	AG	GG	AG	GG	AG	AG	AG	GG	GG
contig54531_253	G	A	AG	AG	AG	GG	GG	AG	AG	AG	AG	GG	AG	AG	GG	AG	AG	GG	AG	AG	GG	AG	GG	GG	GG	AG	AG	AG	GG	AG	GG	GG	GG	AG	GG	GG	GG	GG	AG	GG	AG	GG	AG	GG	AG	AG	AG	GG	GG
contig54531_242	G	A	AG	AG	AG	GG	GG	AG	AG	AG	AG	GG	AG	AG	GG	AG	AG	GG	AG	AG	GG	AG	GG	GG	GG	AG	AG	AG	GG	AG	GG	GG	GG	AG	GG	GG	GG	GG	AG	GG	AG	GG	AG	GG	GG	GG	AG	GG	GG
contig54531_87	C	T	TC	TC	TC	CC	CC	TC	TC	TC	TC	CC	TC	TC	CC	TC	TC	CC	TC	TC	CC	TC	CC	CC	CC	TC	TC	TC	CC	TC	CC	CC	CC	TC	CC	CC	CC	CC	TC	CC	TC	CC	TC	CC	CC	TC	TC	CC	CC
contig14927_274	C	T	TC	CC	TC	CC	CC	TC	CC	CC	CC	TC	TC	CC	CC	TC	CC	CC	TC	TC	CC	CC	CC	TC	CC	CC	CC	TC	CC	TC	CC	CC	CC	TC	TC	CC	CC	TC	CC	CC	CC	TC	TC	CC	CC	TC	TC	CC	CC
contig54531_185	A	T	TA	TA	TA	AA	AA	TA	TA	TA	TA	AA	TA	TA	AA	TA	TA	AA	TA	TA	AA	TA	AA	AA	AA	TA	TA	TA	AA	TA	AA	AA	AA	TA	AA	AA	AA	AA	TA	AA	TA	AA	TA	AA	AA	TA	TA	AA	AA
contig68905_223	G	A	AG	GG	AG	GG	GG	AG	GG	GG	GG	AG	AG	GG	GG	AG	GG	GG	AG	AG	GG	GG	GG	AG	GG	GG	GG	AG	GG	AG	GG	GG	GG	AG	AG	GG	GG	GG	GG	GG	GG	AG	AG	GG	GG	AG	AG	GG	GG
contig68905_175	G	A	AA	AG	AA	GG	GG	AA	AG	AG	AG	AG	AA	AG	GG	AA	AG	GG	AA	AA	GG	AG	GG	AG	GG	AG	AG	AA	GG	AA	GG	GG	GG	AA	AG	GG	GG	GG	AG	GG	AG	AG	AA	GG	GG	AA	AA	GG	GG
contig884999_12	G	A	GG	AG	GG	AG	AG	GG	AG	AG	AG	GG	GG	AG	AG	GG	AG	AG	GG	GG	AG	AG	AG	GG	AG	AG	AG	GG	AG	GG	AG	AG	AG	GG	GG	AG	AG	GG	AG	AG	AG	GG	GG	AG	GG	GG	AG	AG	AG
contig14927_205	C	T	CC	TC	CC	TC	TC	CC	TC	TC	TC	CC	CC	TC	TC	CC	TC	TC	CC	CC	TC	TC	TC	CC	TC	TC	TC	CC	TC	CC	TC	TC	TC	CC	CC	TC	TC	CC	TC	TC	TC	CC	CC	TC	CC	CC	CC	CC	TC
contig68905_178	G	A	GG	AG	GG	AG	AG	GG	AG	AG	AG	GG	GG	AG	AG	GG	AG	AG	GG	GG	AG	AG	AG	GG	AG	AG	AG	GG	AG	GG	AG	AG	AG	GG	GG	AG	AG	AG	AG	AG	AG	GG	GG	AG	GG	GG	GG	GG	AG
contig14927_70	G	A	GG	AG	GG	AA	AA	GG	AG	AG	AG	AG	GG	AA	AA	GG	AA	AA	GG	GG	AA	AG	AA	AG	AA	AA	AG	GG	AA	GG	AA	AA	AA	GG	AG	AA	AA	AG	AG	AA	AG	AG	GG	AA	GG	GG	GG	GG	AA
contig71349_48	C	T	CC	TC	CC	TC	TC	CC	TC	TC	TC	CC	CC	TC	TC	CC	TC	CC	CC	CC	TC	TC	TC	CC	TC	TC	TC	CC	TC	CC	TC	TC	TC	CC	CC	TC	TC	TC	TC	TC	TC	CC	CC	TC	CC	CC	CC	CC	TC
contig14927_103	C	T	CC	TC	CC	TC	TC	CC	TC	TC	TC	CC	CC	TC	TC	CC	TC	TC	CC	CC	TC	TC	TC	CC	TC	TC	TC	CC	TC	CC	TC	TC	TC	CC	CC	TC	TC	CC	TC	TC	TC	CC	CC	TC	CC	CC	CC	CC	TC
contig25165_216	C	T	TC	CC	TC	CC	CC	TC	CC	CC	CC	TC	TC	CC	CC	TC	CC	CC	TC	TC	CC	CC	CC	TC	CC	CC	CC	TC	CC	TC	CC	CC	CC	TC	TC	CC	CC	CC	CC	CC	CC	TC	TC	CC	CC	TC	TC	TC	CC
contig51826_147	C	A	CC	AC	CC	AC	AC	CC	AC	AC	AC	CC	CC	CC	AC	CC	AA	AC	CC	CC	AC	AC	AC	CC	AC	AC	AA	CC	AC	CC	AC	AC	AC	CC	CC	AC	AC	CC	AC	AC	AC	CC	CC	AC	CC	CC	AC	CC	AC
contig40568_120	T	C	CT	CC	CT	CT	CT	CT	CC	CC	CC	TT	CT	CT	CT	CT	CC	CT	CT	CT	CT	CC	CT	TT	CT	CC	CC	CT	CT	CT	CT	CT	CT	CT	TT	CT	CT	TT	CC	CT	CC	TT	CT	CT	TT	TT	TT	TT	CT
contig423427_13	G	T	TG	GG	TG	GG	GG	TG	GG	GG	GG	TG	TG	TG	GG	TG	GG	GG	TG	TG	GG	GG	GG	TG	GG	GG	GG	TG	GG	TG	GG	GG	GG	TG	TG	GG	GG	TG	GG	GG	GG	TG	TG	GG	TG	TG	TG	TG	GG
contig51826_28	A	T	TA	AA	TA	AA	AA	TT	AA	AA	AA	TA	TA	TA	AA	TA	AA	AA	TA	TA	AA	AA	AA	TA	AA	AA	AA	TA	AA	TA	AA	AA	AA	TT	TA	AA	AA	TA	AA	AA	AA	TA	TA	AA	TA	TA	TA	TT	AA
contig51826_81	C	T	TC	CC	TC	CC	CC	TT	CC	CC	CC	TC	TC	TC	CC	TC	CC	CC	TC	TC	CC	CC	CC	TC	CC	CC	CC	TC	CC	TC	CC	CC	CC	TT	TC	CC	CC	TC	CC	CC	CC	TC	TC	CC	TC	TC	TC	TT	CC
contig40568_114	T	G	TT	GT	TT	GT	GT	TT	GT	GT	GT	TT	TT	TT	GT	TT	GT	GT	TT	TT	GT	GT	GT	TT	GT	GT	GT	TT	GT	TT	GT	GT	GT	TT	TT	GT	GT	TT	GT	GT	GT	TT	TT	GT	TT	TT	GT	TT	GT
contig834602_150	C	A	AC	CC	AC	CC	CC	AC	CC	CC	CC	AC	AC	AC	CC	AC	CC	CC	AC	AC	CC	CC	CC	AC	CC	CC	CC	AC	CC	AC	CC	CC	CC	AC	AC	CC	CC	AC	CC	CC	CC	AC	AC	CC	AC	AC	AC	CC	CC
contig533857_175	A	C	CA	AA	CA	AA	AA	CA	AA	AA	AA	CA	CA	CA	AA	CA	AA	AA	CA	CA	AA	AA	AA	CA	AA	AA	AA	CA	AA	CA	AA	AA	AA	CA	CA	AA	AA	CA	AA	AA	AA	CA	CA	AA	CA	CA	CA	AA	AA
contig533857_189	A	T	TA	AA	TA	AA	AA	TA	AA	AA	AA	TA	TA	TA	AA	TA	AA	AA	TA	TA	AA	AA	AA	TA	AA	AA	AA	TA	AA	TA	AA	AA	AA	TA	TA	AA	AA	TA	AA	AA	AA	TA	TA	AA	TA	TA	TA	AA	AA
contig545223_26	T	A	AT	TT	AT	TT	TT	AT	TT	TT	TT	AT	AT	AT	TT	AT	TT	TT	AT	AT	TT	TT	TT	AT	TT	TT	TT	AT	TT	AT	TT	TT	TT	AT	AT	TT	TT	AT	TT	TT	TT	AT	AT	TT	AT	AT	AT	AT	TT
contig533857_188	G	A	AG	GG	AG	GG	GG	AG	GG	GG	GG	AG	AG	AG	GG	AG	GG	GG	AG	AG	GG	GG	GG	AG	GG	GG	GG	AG	GG	AG	GG	GG	GG	AG	AG	GG	GG	AG	GG	GG	GG	AG	AG	GG	AG	AG	AG	AG	GG
contig398333_78	C	A	CC	AC	CC	AC	AC	CC	AC	AC	AC	CC	CC	CC	AC	CC	AC	AC	CC	CC	AC	CC	AC	CC	AC	AC	AC	CC	AC	CC	AC	AC	AC	CC	CC	AC	AC	CC	AC	AC	AC	CC	CC	AC	CC	CC	CC	CC	AC
contig55714_156	T	C	CT	TT	CT	TT	TT	CT	TT	TT	TT	CT	CT	CT	TT	CT	TT	TT	CT	CT	TT	CT	TT	CT	TT	TT	TT	CT	TT	CT	TT	TT	TT	CT	CT	TT	TT	CT	TT	TT	TT	CT	CT	TT	CT	CT	CT	CT	TT
contig55714_153	A	T	AA	TA	AA	TA	TA	AA	TA	TA	TA	AA	AA	AA	TA	AA	TA	TA	AA	AA	TA	AA	TA	AA	TA	TA	TA	AA	TA	AA	TA	TA	TA	AA	AA	TA	TA	AA	TA	TA	TA	AA	AA	TA	AA	AA	AA	AA	TA
contig624746_14	G	C	CG	GG	CG	GG	GG	CG	GG	GG	GG	CG	CG	CG	GG	CG	GG	GG	CG	CG	GG	CG	GG	CG	GG	GG	GG	CG	GG	CG	GG	GG	GG	CG	CG	GG	GG	CG	GG	GG	GG	CG	CG	GG	CG	CG	CG	CG	GG
contig55714_84	A	G	GA	AA	GA	AA	AA	GA	AA	AA	AA	GA	GA	GA	AA	GA	AA	AA	GA	GA	AA	GA	AA	GA	AA	AA	AA	GA	AA	GA	AA	AA	AA	GA	GA	AA	AA	GA	AA	AA	AA	GA	GA	AA	GA	GA	GA	GA	AA
contig35864_14	A	G	GA	AA	GA	AA	AA	GA	AA	AA	AA	GA	GA	GA	AA	GA	AA	AA	GA	GA	AA	GA	AA	GA	AA	AA	AA	GA	AA	GA	AA	AA	AA	GA	GA	AA	AA	GA	AA	AA	AA	GA	GA	AA	GA	GA	GA	GA	AA
contig14548_109	T	C	CT	TT	CT	TT	TT	CT	TT	TT	TT	CT	CT	CT	TT	CT	TT	TT	CT	CT	TT	CT	TT	CT	TT	TT	TT	CT	TT	CT	TT	TT	TT	CT	CT	TT	TT	CT	TT	TT	TT	CT	CT	TT	CT	CT	CT	CT	TT
contig55714_173	A	G	GA	GG	GA	GA	GA	AA	GG	GG	GG	AA	AA	GA	GA	GA	GG	GA	GA	GA	GA	GA	GA	AA	GA	GG	GG	GA	GA	GA	GA	GA	GA	GA	AA	GA	GA	AA	GG	GA	GG	AA	GA	GA	AA	AA	AA	AA	GA
contig54531_232	A	T	AA	TA	AA	TA	TA	AA	TA	TA	TA	AA	AA	AA	TA	AA	TA	TA	AA	AA	TA	AA	TA	AA	TA	TA	TA	AA	TA	AA	TA	TA	TA	AA	AA	TA	TA	AA	TA	TA	TA	AA	AA	TA	TA	AA	TA	AA	TA
contig14548_113	A	G	GA	AA	GA	AA	AA	GA	AA	AA	AA	GA	GA	GA	AA	GA	AA	AA	GA	GA	AA	GA	AA	GA	AA	AA	AA	GA	AA	GA	AA	AA	AA	GA	GA	AA	AA	GA	AA	AA	AA	GA	GA	AA	GG	GA	GG	GA	AA
contig54531_193	A	T	AA	TA	AA	TA	TA	AA	TA	TA	TA	AA	AA	AA	TA	AA	TA	TA	AA	AA	TA	AA	TA	AA	TA	TA	TA	AA	TA	AA	TA	TA	TA	AA	AA	TA	TA	AA	TA	TA	TA	AA	AA	TA	TA	AA	TA	TA	TA
contig55714_90	A	G	GA	AA	GA	AA	AA	GA	AA	AA	AA	GA	GA	GA	AA	GA	AA	AA	GA	GA	AA	GA	AA	GA	AA	AA	AA	GA	AA	GA	AA	AA	AA	GA	GA	AA	AA	GA	AA	AA	AA	GA	GA	AA	AA	GA	AA	AA	AA
contig475448_70	A	T	TA	TT	TA	TA	TA	TA	TT	TT	TT	AA	TA	TA	TA	TA	TT	TA	TA	TA	TA	TA	TA	AA	TA	TT	TT	TA	TA	TA	TA	TA	TA	TA	AA	TA	TA	AA	TT	TA	TT	AA	AA	TA	TT	TA	TT	TA	TA
contig28804_36	T	G	TT	GT	TT	GT	GT	TT	GT	GT	GT	TT	TT	TT	GT	TT	GT	GT	TT	TT	GT	TT	GT	TT	GT	GT	GT	TT	GT	TT	GT	GT	GT	TT	TT	GT	GT	TT	GT	GT	GT	TT	TT	GT	GT	TT	GT	GT	GT
contig475448_179	C	T	CC	TC	CC	TC	TC	CC	TC	TC	TC	CC	CC	CC	TC	CC	TC	TC	CC	CC	TC	CC	TC	CC	TC	TC	TC	CC	TC	CC	TC	TC	TC	CC	CC	TC	TC	CC	TC	TC	TC	CC	CC	TC	TC	CC	TC	TC	TC
contig28804_82	A	G	AA	GA	AA	GA	GA	AA	GA	GA	GA	AA	AA	AA	GA	AA	GA	GA	AA	AA	GA	AA	GA	AA	GA	GA	GA	AA	GA	AA	GA	GA	GA	AA	AA	GA	GA	AA	GA	GA	GA	AA	AA	GA	GA	AA	GA	GA	GA
contig24388_15	T	A	AT	TT	AT	TT	TT	AA	TT	TT	TT	AT	AT	AT	TT	AT	TT	TT	AT	AT	TT	AT	TT	AT	TT	TT	TT	AT	TT	AT	TT	TT	TT	AT	AT	TT	TT	AT	TT	TT	TT	AT	AT	TT	TT	AA	TT	TT	TT
contig93410_168	T	C	CT	TT	CT	TT	TT	CT	TT	TT	TT	CT	CT	CT	TT	CT	TT	TT	CT	CT	TT	CT	TT	CT	TT	TT	TT	CT	TT	CT	TT	TT	TT	CT	CT	TT	TT	CT	TT	TT	TT	CT	CT	TT	TT	CT	TT	TT	TT
contig478166_54	A	G	AA	GA	AA	GA	GA	AA	GA	GA	GA	AA	AA	AA	GA	AA	GA	GA	AA	AA	GA	AA	GA	AA	GA	GA	GA	AA	GA	AA	GA	GA	GA	AA	AA	GA	GA	AA	GA	GA	GA	AA	AA	GA	GA	AA	GA	GA	GA
contig24388_102	C	G	GC	CC	GC	CC	CC	GC	CC	CC	CC	GC	GC	GC	CC	GC	CC	CC	GC	GC	CC	GC	CC	GC	CC	CC	CC	GC	CC	GC	CC	CC	CC	GC	GC	CC	CC	GC	CC	CC	CC	GC	GC	CC	CC	GC	CC	CC	CC
contig478166_77	T	C	CT	TT	CT	TT	TT	CT	TT	TT	TT	CT	CT	CT	TT	CT	TT	TT	CT	CT	TT	CT	TT	CT	TT	TT	TT	CT	TT	CT	TT	TT	TT	CT	CT	TT	TT	CT	TT	TT	TT	CT	CT	TT	TT	CT	TT	TT	TT
contig478166_97	A	G	GG	AA	GG	AA	AA	GG	GA	GA	AA	GA	GG	GG	AA	GG	GA	AA	GG	GG	AA	GG	AA	GA	AA	GA	GA	GG	AA	GG	AA	AA	AA	GG	GA	AA	AA	GA	GA	AA	GA	GA	GG	AA	GG	GG	GG	GG	AA
contig24388_180	A	G	GG	GA	GG	AA	AA	GG	GA	GA	GA	GA	GG	GG	AA	GG	GA	AA	GG	GG	AA	GG	AA	GA	AA	GA	GA	GG	AA	GG	AA	AA	AA	GG	GA	AA	AA	GA	GA	AA	GA	GA	GG	AA	GG	GG	GG	GG	AA
contig24388_183	G	A	GG	AG	GG	AA	AA	GG	AG	AG	AG	AG	GG	GG	AA	GG	AG	AA	GG	GG	AA	GG	AA	AG	AA	AG	AG	GG	AA	GG	AA	AA	AA	GG	AG	AA	AA	AG	AG	AA	AG	AG	GG	AA	GG	GG	GG	GG	AA
contig24388_113	C	A	AC	CC	AC	CC	CC	AC	CC	CC	CC	AC	AC	AC	CC	AC	CC	CC	AC	AC	CC	AC	CC	AC	CC	CC	CC	AC	CC	AC	CC	CC	CC	AC	AC	CC	CC	AC	CC	CC	CC	AC	AC	CC	AC	AC	AC	CC	CC
contig93410_47	T	C	TT	CT	TT	CT	CT	TT	CT	CT	CT	TT	TT	TT	CT	TT	CT	CT	TT	TT	CT	TT	CT	TT	CT	CT	CT	TT	CT	TT	CT	CT	CT	TT	TT	CT	CT	TT	CT	CT	CT	TT	TT	CT	CT	TT	TT	CT	CT
contig470597_11	C	T	TC	CC	TC	CC	CC	TC	CC	CC	CC	TC	TC	TC	CC	TC	CC	CC	TC	TC	CC	TC	CC	TC	CC	CC	CC	TC	CC	TC	CC	CC	CC	TC	TC	CC	CC	TC	CC	CC	CC	TC	TC	CC	TC	TC	TC	TC	CC
contig650817_19	T	C	TT	CT	TT	CT	CT	TT	CT	CT	CT	TT	TT	TT	CT	TT	CT	CT	TT	TT	CT	TT	TT	TT	CT	CT	CT	TT	CT	TT	CT	CT	CT	TT	TT	CT	CT	TT	CT	CT	CT	TT	TT	CT	CT	TT	TT	CT	CT
contig35184_35	G	C	GG	CG	GG	CG	CG	GG	CG	CG	CG	GG	GG	GG	CG	GG	CG	CG	GG	GG	CG	GG	CG	GG	CG	CG	CG	GG	CG	GG	CG	CG	CG	GG	GG	CG	CG	GG	CG	CG	CG	GG	GG	CG	CG	GG	GG	CG	CG
contig538960_25	C	T	CC	TC	CC	TC	TC	CC	TC	TC	TC	CC	CC	CC	TC	CC	TC	TC	CC	CC	TC	CC	TC	CC	TC	TC	TC	CC	TC	CC	TC	TC	TC	CC	CC	TC	TC	CC	TC	TC	TC	CC	CC	TC	CC	CC	CC	TC	TC
contig24388_73	T	C	TT	CT	TT	CT	CT	TT	CT	CT	CT	TT	TT	TT	CT	TT	CT	CT	TT	TT	CT	TT	CT	TT	CT	CT	CT	TT	CT	TT	CT	CT	CT	TT	TT	CT	CT	TT	CT	CT	CT	TT	TT	CT	TT	TT	TT	CT	CT
contig93410_115	T	C	TT	CT	TT	CT	CT	TT	CT	CT	CT	TT	TT	TT	CT	TT	CT	CT	TT	TT	CT	TT	CT	TT	CT	CT	CT	TT	CT	TT	CT	CT	CT	TT	TT	CT	CT	TT	CT	CT	CT	TT	TT	CT	TT	TT	TT	TT	CT
contig650817_75	C	T	CC	TC	CC	TC	TC	CC	TC	TC	TC	CC	CC	CC	TC	CC	TC	TC	CC	CC	TC	CC	CC	CC	TC	TC	TC	CC	TC	CC	TC	TC	TC	CC	CC	TC	TC	CC	TC	TC	TC	CC	CC	TC	TC	CC	CC	TC	TC
contig93410_52	C	T	CC	TC	CC	TC	TC	CC	TC	TC	TC	CC	CC	CC	TC	CC	TC	TC	CC	CC	TC	CC	TC	CC	TC	TC	TC	CC	TC	CC	TC	TC	TC	CC	CC	TC	TC	CC	TC	TC	TC	CC	CC	TC	TC	CC	TC	TC	TC
contig76722_5	G	A	GG	AG	GG	GG	AG	GG	AG	AG	AG	GG	GG	GG	AG	GG	AG	GG	GG	GG	AG	GG	AG	GG	AG	AG	AG	GG	AG	GG	AG	AG	AG	GG	GG	AG	AG	GG	AG	AG	AG	GG	GG	AG	GG	GG	GG	GG	AG
contig650817_152	T	A	TT	AT	TT	AT	AT	TT	AT	AT	AT	TT	TT	TT	AT	TT	AT	AT	TT	TT	AT	TT	TT	TT	AT	AT	AT	TT	AT	TT	AT	AT	AT	TT	TT	AT	AT	TT	AT	AT	AT	TT	TT	AT	TT	TT	TT	TT	AT
contig47610_181	T	C	CT	TT	CT	TT	TT	CT	TT	TT	TT	CT	CT	CT	TT	CT	TT	TT	CT	CT	TT	CT	TT	CT	TT	TT	TT	CT	TT	CT	TT	TT	TT	CT	CT	TT	TT	CT	TT	TT	TT	CT	CT	TT	CT	CT	CT	CT	TT
contig4867_197	A	G	AA	GA	AA	GA	GA	AA	GA	GA	GA	AA	AA	AA	GA	AA	GA	GA	AA	AA	GA	AA	GA	AA	GA	GA	GA	AA	GA	AA	GA	GA	GA	AA	AA	GA	GA	AA	GA	GA	GA	AA	AA	GA	AA	AA	GA	AA	GA
contig4867_14	G	A	GG	AG	GG	AG	AG	GG	AG	AG	AG	GG	GG	GG	AG	GG	AG	AG	GG	GG	AG	GG	AG	GG	AG	AG	AG	GG	AG	GG	AG	AG	AG	GG	GG	AG	AG	GG	AG	AG	AG	GG	GG	AG	GG	GG	AG	GG	AG
contig185682_16	C	T	TC	TT	TC	TC	TC	TC	TT	TT	TT	CC	TC	TC	TC	TC	TT	TC	TC	TC	TC	TC	TC	CC	TC	TT	TT	CC	TC	TC	TC	TC	TC	TC	CC	TC	TC	CC	TT	TC	TT	CC	TC	TC	CC	CC	CC	CC	TC
contig47610_34	T	C	CT	TT	CT	TT	TT	CT	TT	TT	TT	CT	CT	CT	TT	CT	TT	TT	CT	CT	TT	CT	TT	CT	TT	TT	TT	CT	TT	CT	TT	TT	TT	CT	CT	TT	TT	CT	TT	TT	TT	CT	CT	TT	CT	CT	CT	CT	TT
contig185682_174	T	C	CT	TT	CT	TT	TT	CT	TT	TT	TT	CT	CT	CT	TT	CT	TT	TT	CT	CT	TT	CT	TT	CT	TT	TT	TT	CT	TT	CT	TT	TT	TT	CT	CT	TT	TT	CT	TT	TT	TT	CT	CT	TT	CT	CT	CT	CT	TT
contig185682_54	T	G	GG	GT	GG	TT	TT	GG	GT	GT	GT	GG	GG	GG	TT	GG	GT	TT	GG	GG	TT	GG	TT	GT	TT	GT	GT	GG	TT	GG	TT	TT	TT	GG	GT	TT	TT	GT	GT	TT	GT	GT	GG	TT	GG	GG	TT	GG	TT
contig650817_44	A	T	TT	TA	TT	AA	AA	TT	TA	TA	AA	TT	TT	TT	AA	TT	TA	AA	TT	TT	AA	TT	AA	TA	AA	TA	AA	TT	AA	TT	AA	AA	AA	TT	TA	AA	AA	TA	TA	AA	TA	TT	TT	AA	TA	TA	TT	TT	AA
contig76722_111	A	C	AA	CA	AA	AA	CA	AA	CA	CA	CA	AA	AA	AA	CA	AA	CA	AA	AA	AA	CA	AA	CA	AA	CA	CA	CA	AA	CA	AA	CA	CA	CA	AA	AA	CA	CA	AA	CA	CA	CA	AA	AA	CA	AA	AA	AA	AA	CA
contig12891_14	C	T	TC	CC	TC	CC	CC	TC	CC	CC	CC	TC	TC	TC	CC	TC	CC	CC	TC	TC	CC	TC	CC	TC	CC	CC	CC	TC	CC	TC	CC	CC	CC	TC	TC	CC	CC	TC	CC	CC	CC	TC	TC	CC	CC	TC	TC	TC	CC
contig12891_108	T	G	GT	TT	GT	TT	TT	GT	TT	TT	TT	GT	GT	GT	TT	GT	TT	TT	GT	GT	TT	GT	TT	GT	TT	TT	TT	GT	TT	GT	TT	TT	TT	GT	GT	TT	TT	GT	TT	TT	TT	GT	GT	TT	TT	GT	GT	GT	TT
contig729309_66	A	G	GA	AA	GA	AA	AA	GA	AA	AA	AA	GA	GA	GA	AA	GA	AA	AA	GA	GA	AA	GA	AA	GA	AA	AA	AA	GA	AA	GA	AA	AA	AA	GA	GA	AA	AA	GA	AA	AA	AA	GA	GA	AA	AA	GA	GA	GA	AA
contig31494_229	C	T	TC	CC	TC	CC	CC	TC	CC	CC	CC	TC	TC	TC	CC	TC	CC	CC	TC	TC	CC	TC	CC	TC	CC	CC	CC	TC	CC	TC	CC	CC	CC	TC	TC	CC	CC	TC	CC	CC	CC	TC	TC	CC	CC	TC	TC	TC	CC
contig21381_177	T	C	CT	CC	CT	CT	CT	CT	CC	CC	CC	TT	CT	CT	CT	CT	CC	CT	CT	CT	CT	CT	CT	TT	CT	CC	CC	CT	CT	CT	CT	CC	CT	CT	TT	CT	CT	TT	CC	CT	CC	TT	CT	CT	CC	TT	CT	TT	CT
contig32494_174	A	G	GA	AA	GA	AA	AA	GA	AA	AA	AA	GA	GA	GA	AA	GA	AA	AA	GA	GA	AA	GA	AA	GA	AA	AA	AA	GA	AA	GA	AA	AA	AA	GA	GA	AA	AA	GA	AA	AA	AA	GA	GA	AA	AA	GA	GA	GA	AA
contig21381_23	C	T	TC	CC	TC	CC	CC	TC	CC	CC	CC	TC	TC	TC	CC	TC	CC	CC	TC	TC	CC	TC	CC	TC	CC	CC	CC	TC	CC	TC	CC	CC	CC	TC	TC	CC	CC	TC	CC	CC	CC	TC	TC	CC	CC	TC	TC	TC	CC
contig715976_105	G	A	AG	GG	AG	GG	GG	AG	GG	GG	GG	AG	AG	AG	GG	AG	GG	GG	AG	AG	GG	AG	GG	AG	GG	GG	GG	AG	GG	AG	GG	GG	GG	AG	AG	GG	GG	AG	GG	GG	GG	AG	AG	GG	GG	AG	AG	AG	GG
contig32494_5	G	T	GG	GG	GG	TG	TG	GG	GG	GG	GG	TG	GG	GG	TG	GG	GG	TG	GG	GG	TG	GG	TG	TG	TG	GG	GG	GG	TG	GG	TG	TG	TG	GG	TG	TG	TG	TG	GG	TG	GG	TG	GG	TG	TG	GG	GG	GG	TG
contig32494_227	T	A	AT	AA	AT	AT	AT	AT	AA	AA	AA	TT	AT	AT	AT	AT	AA	AT	AT	AT	AT	AT	AT	TT	AT	AA	AA	AT	AT	AT	AT	AT	AT	AT	TT	AT	AT	TT	AA	AT	AA	TT	AT	AT	TT	TT	AT	TT	AT
contig21381_127	G	A	AG	GG	AG	GG	GG	AG	GG	GG	GG	AG	AG	AG	GG	AG	GG	GG	AG	AG	GG	AG	GG	AG	GG	GG	GG	AG	GG	AG	GG	GG	GG	AG	AG	GG	GG	AG	GG	GG	GG	AG	AG	GG	GG	AG	AG	GG	GG
contig32494_125	G	A	AG	GG	AG	GG	GG	AG	GG	GG	GG	AG	AG	AG	GG	AG	GG	GG	AG	AG	GG	AG	GG	AG	GG	GG	GG	AG	GG	AG	GG	GG	GG	AG	AG	GG	GG	AG	GG	GG	GG	AG	AG	GG	GG	AG	AG	GG	GG
contig21381_173	C	T	TC	TT	TC	TC	TC	TC	TT	TT	TT	CC	TC	TC	TC	TC	TT	TC	TC	TC	TC	TC	TC	CC	TC	TT	TT	TC	TC	TC	TC	TC	TC	TC	CC	TC	TC	CC	TT	TC	TT	CC	TC	TC	CC	CC	TC	CC	TC
contig21381_90	G	A	AG	GG	AG	GG	GG	AG	GG	GG	GG	AG	AG	AG	GG	AG	GG	GG	AG	AG	GG	AG	GG	AG	GG	GG	GG	AG	GG	AG	GG	GG	GG	AG	AG	GG	GG	AG	GG	GG	GG	AG	AG	GG	GG	AG	AG	GG	GG
contig32494_61	A	G	GA	GG	GA	GA	GA	GA	GG	GG	GG	AA	GA	GA	GA	GA	GG	GA	GA	GA	GA	GA	GA	AA	GA	GG	GG	GA	GA	GA	GA	GA	GA	GA	AA	GA	GA	AA	GG	GA	GG	AA	GA	GA	AA	AA	GA	AA	GA
contig715976_86	G	C	GG	CG	GG	CG	CG	GG	CG	CG	CG	GG	GG	GG	CG	GG	CG	CG	GG	GG	CG	GG	CG	GG	CG	CG	CG	GG	CG	GG	CG	CG	CG	GG	GG	CG	CG	GG	CG	CG	CG	GG	GG	CG	CG	GG	GG	CG	CG
contig20366_35	G	A	GG	GG	GG	AG	AG	GG	GG	GG	GG	AG	GG	GG	AG	GG	GG	AG	GG	GG	AG	GG	AG	AG	AG	GG	GG	GG	AG	GG	AG	AG	AG	GG	AG	AG	AG	AG	GG	AG	GG	AG	GG	AG	AG	AG	GG	AG	AG
contig21381_63	C	T	CC	TC	CC	TC	TC	CC	TC	TC	TC	CC	CC	CC	TC	CC	TC	TC	CC	CC	TC	CC	TC	CC	TC	TC	TC	CC	TC	CC	TC	TC	TC	CC	CC	TC	TC	CC	TC	TC	TC	CC	CC	TC	TC	CC	CC	TC	TC
contig715976_78	T	C	CT	CC	CT	CT	CT	CT	CC	CC	CC	TT	CT	CT	CT	CT	CC	CT	CT	CT	CT	CT	CT	TT	CT	CC	CC	CT	CT	CT	CT	CT	CT	CT	TT	CT	CT	TT	CC	CT	CC	TT	CT	CT	TT	TT	CC	TT	CT
contig21381_183	T	A	TT	AT	TT	AT	AT	TT	AT	AT	AT	TT	TT	TT	AT	TT	AT	AT	TT	TT	AT	TT	AT	TT	AT	AT	AT	TT	AT	TT	AT	AT	AT	TT	TT	AT	AT	TT	AT	AT	AT	TT	TT	AT	AT	TT	TT	AT	AT
contig42093_100	G	A	GG	GG	GG	AG	AG	GG	GG	GG	GG	AG	GG	GG	AG	GG	GG	AG	GG	GG	AG	GG	AG	AG	AG	GG	GG	GG	AG	GG	AG	AG	AG	GG	AG	AG	AG	AG	GG	AG	GG	AG	GG	AG	AA	AG	GG	AG	AG
contig4867_60	G	A	GG	GG	GG	AG	AG	GG	GG	GG	GG	AG	GG	GG	AG	GG	GG	AG	GG	GG	AG	GG	AG	AG	AG	GG	GG	GG	AG	GG	AG	AG	AG	GG	AG	AG	AG	AG	GG	AG	GG	AG	GG	AG	AG	AG	GG	AG	AG
contig185682_5	C	A	AC	AC	AC	CC	CC	AC	AC	AC	AC	CC	AC	AC	CC	AC	AC	CC	AC	AC	CC	AC	CC	CC	CC	AC	AC	AC	CC	AC	CC	CC	CC	AC	CC	CC	CC	CC	AC	CC	AC	CC	AC	CC	CC	CC	AC	CC	CC
contig47163_134	C	G	CC	CC	CC	GC	GC	CC	CC	CC	CC	GC	CC	CC	GC	CC	CC	GC	CC	CC	GC	CC	GC	GC	GC	CC	CC	CC	GC	CC	GC	GC	GC	CC	GC	GC	GC	GC	CC	GC	CC	GC	CC	GC	GG	GC	CC	GC	GC
contig24388_166	G	A	AG	AG	AG	GG	GG	GG	AG	AG	AG	GG	AG	AG	GG	AG	AG	GG	AG	AG	GG	AG	GG	GG	GG	AG	AG	AG	GG	AG	GG	GG	GG	AG	GG	GG	GG	GG	AG	GG	AG	GG	AG	GG	GG	GG	AG	GG	GG
contig724673_96	A	T	AA	AA	AA	TA	TA	AA	AA	AA	AA	TA	AA	AA	TA	AA	AA	TA	AA	AA	TA	AA	TA	TA	TA	AA	AA	AA	TA	AA	TA	TA	TA	AA	TA	TA	TA	TA	AA	TA	AA	TA	AA	TA	TA	TA	AA	TA	TA
contig24388_175	T	G	GT	GT	GT	TT	TT	TT	GT	GT	GT	TT	GT	GT	TT	GT	GT	TT	GT	GT	TT	GT	TT	TT	TT	GT	GT	GT	TT	GT	TT	TT	TT	GT	TT	TT	TT	TT	GT	TT	GT	TT	GT	TT	TT	TT	GT	TT	TT
contig47163_89	C	T	CC	CC	CC	TC	TC	CC	CC	CC	CC	TC	CC	CC	TC	CC	CC	TC	CC	CC	TC	CC	TC	TC	TC	CC	CC	CC	TC	CC	TC	TC	TC	CC	TC	TC	TC	TC	CC	TC	CC	TC	CC	TC	TT	TC	CC	TC	TC
contig47163_95	T	C	TT	TT	TT	CT	CT	TT	TT	TT	TT	CT	TT	TT	CT	TT	TT	CT	TT	TT	CT	TT	CT	CT	CT	TT	TT	TT	CT	TT	CT	CT	CT	TT	CT	CT	CT	CT	TT	CT	TT	CT	TT	CT	CC	CT	TT	CT	CT
contig724467_131	T	C	TT	TT	TT	CT	CT	TT	TT	TT	TT	CT	TT	TT	CT	TT	TT	CT	TT	TT	CT	TT	CT	CT	CT	TT	TT	TT	CT	TT	CT	CT	CT	TT	CT	CT	CT	CT	TT	CT	TT	CT	TT	CT	CT	CT	TT	CT	CT
contig680700_36	T	C	TT	TT	TT	CT	CT	TT	TT	TT	TT	CT	TT	TT	CT	TT	TT	CT	TT	TT	CT	TT	CT	CT	CT	TT	TT	TT	CT	TT	CT	CT	CT	TT	CT	CT	CT	CT	TT	CT	TT	CT	TT	CT	CT	CT	TT	CT	CT
contig713410_129	G	A	GG	GG	GG	AG	AG	GG	GG	GG	GG	AG	GG	GG	AG	GG	GG	AG	GG	GG	AG	GG	AG	AG	AG	GG	GG	GG	AG	GG	AG	AG	AG	GG	AG	AG	AG	AG	GG	AG	GG	AG	GG	AG	AG	AG	GG	AG	AG
contig674020_122	T	C	CT	CT	CT	TT	TT	CT	CT	CT	CT	TT	CT	CT	TT	CT	CT	TT	CT	CT	TT	CT	TT	TT	TT	CT	CT	CT	TT	CT	TT	TT	TT	CT	TT	TT	TT	TT	CT	TT	CT	TT	CT	TT	TT	TT	CT	TT	TT
contig14548_7	C	T	TC	TC	TC	CC	CC	TC	TC	TC	TC	CC	TC	TC	CC	TC	TC	CC	TT	TC	CC	TC	CC	CC	CC	TC	TC	TT	CC	TC	CC	CC	CC	TC	CC	CC	CC	CC	TC	CC	TC	CC	TC	CC	CC	CC	TT	CC	CC
contig538960_97	G	A	AG	AG	AG	GG	GG	AG	AG	AG	AG	GG	AG	AG	GG	AG	AG	GG	AG	AG	GG	AG	GG	GG	GG	AG	AG	AG	GG	AG	GG	GG	GG	AG	GG	GG	GG	GG	AG	GG	AG	GG	AG	GG	GG	AG	AG	GG	GG
contig24388_92	A	G	AA	AA	AA	GA	GA	AA	AA	AA	AA	GA	AA	AA	GA	AA	AA	GA	AA	AA	GA	AA	GA	GA	GA	AA	AA	AA	GA	AA	GA	GA	GA	AA	GA	GA	GA	GA	AA	GA	AA	GA	AA	GA	GA	AA	AA	GA	GA
contig724673_68	C	T	TC	TC	TC	CC	CC	TC	TC	TC	TC	CC	TC	TC	CC	TC	TC	CC	TC	TC	CC	TC	CC	CC	CC	TC	TC	TC	CC	TC	CC	CC	CC	TC	CC	CC	CC	CC	TC	CC	TC	CC	TC	CC	CC	TC	TC	CC	CC
contig185682_171	G	A	AG	AG	AG	GG	GG	AG	AG	AG	AG	GG	AG	AG	GG	AG	AG	GG	AG	AG	GG	AG	GG	GG	GG	AG	AG	AG	GG	AG	GG	GG	GG	AG	GG	GG	GG	GG	AG	GG	AG	GG	AG	GG	GG	AG	AG	GG	GG
contig724673_26	A	C	CA	CA	CA	AA	AA	CA	CA	CA	CA	AA	CA	CA	AA	CA	CA	AA	CA	CA	AA	CA	AA	AA	AA	CA	CA	CA	AA	CA	AA	AA	AA	CA	AA	AA	AA	AA	CA	AA	CA	AA	CA	AA	AA	CA	CA	AA	AA
contig37972_135	C	T	TC	TC	TC	CC	CC	TC	TC	TC	TC	CC	TC	TC	CC	TC	TC	CC	TC	TC	CC	TC	CC	CC	CC	TC	TC	TC	CC	TC	CC	CC	CC	TC	CC	CC	CC	CC	TC	CC	TC	CC	TC	CC	TC	TC	TC	CC	CC
contig713410_70	A	G	AA	AA	AA	GA	GA	AA	AA	AA	AA	GA	AA	AA	GA	AA	AA	GA	AA	AA	GA	AA	GA	GA	GA	AA	AA	AA	GA	AA	GA	GA	GA	AA	GA	GA	GA	GA	AA	GA	AA	GA	AA	GA	GA	AA	AA	GA	GA
contig53398_16	C	T	TC	TC	TC	CC	CC	TC	TC	TC	TC	CC	TC	TC	CC	TC	TC	CC	TC	TC	CC	TC	CC	CC	CC	TC	TC	TC	CC	TC	CC	CC	CC	TC	CC	CC	CC	CC	TC	CC	TC	CC	TC	CC	CC	TC	TC	CC	CC
contig486851_41	G	A	AG	AG	AG	GG	GG	AG	AG	AG	AG	GG	AG	AG	GG	AG	AG	GG	AG	AG	GG	AG	GG	GG	GG	AG	AG	AG	GG	AG	GG	GG	GG	AG	GG	GG	GG	GG	AG	GG	AG	GG	AG	GG	AG	AG	AG	GG	GG
contig674020_65	A	T	TA	TA	TA	AA	AA	TA	TA	TA	TA	AA	TA	TA	AA	TA	TA	AA	TA	TA	AA	TA	AA	AA	AA	TA	TA	TA	AA	TA	AA	AA	AA	TA	AA	AA	AA	AA	TA	AA	TA	AA	TA	AA	TA	TA	TA	AA	AA
contig93410_23	T	A	AT	AT	AT	TT	TT	AT	AT	AT	AT	TT	AT	AT	TT	AT	AT	TT	AT	AT	TT	AT	TT	TT	TT	AT	AT	AT	TT	AT	TT	TT	TT	AT	TT	TT	TT	TT	AT	TT	AT	TT	AT	TT	AT	AT	AT	TT	TT
contig14548_131	C	T	TC	TC	TC	CC	CC	TC	TC	TC	TC	CC	TC	TC	CC	TC	TC	CC	TT	TC	CC	TC	CC	CC	CC	TC	TC	TT	CC	TC	CC	CC	CC	TC	CC	CC	CC	CC	TC	CC	TC	CC	TC	CC	TC	TC	TT	CC	CC
contig713410_95	T	C	CT	CT	CT	TT	TT	CT	CT	CT	CT	TT	CT	CT	TT	CT	CT	TT	CT	CT	TT	CT	TT	TT	TT	CT	CT	CT	TT	CT	TT	TT	TT	CT	TT	TT	TT	TT	CT	TT	CT	TT	CT	TT	CT	CT	CT	TT	TT
contig21381_70	A	G	AA	AA	AA	GA	GA	AA	AA	AA	AA	GA	AA	AA	GA	AA	AA	GA	AA	AA	GA	AA	GA	GA	GA	AA	AA	AA	GA	AA	GA	GA	GA	AA	GA	GA	GA	GA	AA	GA	AA	GA	AA	GA	AA	AA	AA	GA	GA
contig80747_71	C	T	TC	TC	TC	CC	CC	TC	TC	TC	TC	CC	TC	TC	CC	TC	TC	CC	TC	TC	CC	TC	CC	CC	CC	TC	TC	TC	CC	TC	CC	CC	CC	TC	CC	CC	CC	CC	TC	CC	TC	CC	TC	CC	TC	TC	TC	CC	CC
contig21381_203	T	G	GT	GT	GT	TT	TT	GT	GT	GT	GT	TT	GT	GT	TT	GT	GT	TT	GT	GT	TT	GT	TT	TT	TT	GT	GT	GT	TT	GT	TT	TT	TT	GT	TT	TT	TT	TT	GT	TT	GT	TT	GT	TT	GT	GT	GT	TT	TT
contig729309_72	G	A	AG	AG	AG	GG	GG	AG	AG	AG	AG	GG	AG	AG	GG	AG	AG	GG	AG	AG	GG	AG	GG	GG	GG	AG	AG	AG	GG	AG	GG	GG	GG	AG	GG	GG	GG	GG	AG	GG	AG	GG	AG	GG	AG	AG	AG	GG	GG
contig21381_71	C	T	CC	CC	CC	TC	TC	CC	CC	CC	CC	TC	CC	CC	TC	CC	CC	TC	CC	CC	TC	CC	TC	TC	TC	CC	CC	CC	TC	CC	TC	TC	TC	CC	TC	TC	TC	TC	CC	TC	CC	TC	CC	TC	CC	TC	CC	TC	TC
contig724673_170	C	A	CC	CC	CC	AC	AC	CC	CC	CC	CC	AC	CC	CC	AC	CC	CC	AC	CC	CC	AC	CC	AC	AC	AC	CC	CC	CC	AC	CC	AC	AC	AC	CC	AC	AC	AC	AC	CC	AC	CC	AC	CC	AC	AC	AA	CC	AC	AC
contig538960_85	G	A	AG	AG	AG	GG	GG	AG	AG	AG	AG	GG	AG	AG	GG	AG	AG	GG	AG	AG	GG	AG	GG	GG	GG	AG	AG	AG	GG	AG	GG	GG	GG	AG	GG	GG	GG	GG	AG	GG	AG	GG	AG	GG	AG	AG	AG	GG	GG
contig713410_67	T	C	CT	CT	CT	TT	TT	CT	CT	CT	CT	TT	CT	CT	TT	CT	CT	TT	CT	CT	TT	CT	TT	TT	TT	CT	CT	CT	TT	CT	TT	TT	TT	CT	TT	TT	TT	TT	CT	TT	CT	TT	CT	TT	TT	TT	CT	TT	TT
contig650817_144	T	C	TT	TT	TT	CT	CT	TT	TT	TT	TT	CT	TT	TT	CT	TT	TT	CT	TT	TT	CT	TT	CT	CT	CT	TT	TT	TT	CT	TT	CT	CT	CT	TT	CT	CT	CT	CT	TT	CT	TT	CT	TT	CT	CT	CT	TT	CT	CT
contig713410_153	G	T	GG	GG	GG	TG	TG	GG	GG	GG	GG	TG	GG	GG	TG	GG	GG	TG	GG	GG	TG	GG	TG	TG	TG	GG	GG	GG	TG	GG	TG	TG	TG	GG	TG	TG	TG	TG	GG	TG	GG	TG	GG	TG	TG	TG	GG	TG	TG
contig32494_140	C	T	CC	CC	CC	TC	TC	CC	CC	CC	CC	TC	CC	CC	TC	CC	CC	TC	CC	CC	TC	CC	TC	TC	TC	CC	CC	CC	TC	CC	TC	TC	TC	CC	TC	TC	TC	TC	CC	TC	CC	TC	CC	TC	TC	TC	CC	TC	TC
contig24388_74	C	G	GC	GC	GC	CC	CC	CC	GC	GC	GC	CC	GC	GC	CC	GC	GC	CC	GC	GC	CC	GC	CC	CC	CC	GC	GC	GC	CC	GC	CC	CC	CC	GC	CC	CC	CC	CC	GC	CC	GC	CC	GC	CC	CC	CC	GC	CC	CC
contig29567_188	T	C	TT	TT	TT	CT	CT	TT	TT	TT	TT	CT	TT	TT	CT	TT	TT	CT	TT	TT	CT	TT	CT	CT	CT	TT	TT	TT	CT	TT	CT	CT	CT	TT	CT	CT	CT	CT	TT	CT	TT	CT	TT	CT	CT	CT	TT	CT	CT
contig822520_97	A	T	TT	TT	TT	AA	AA	TT	TA	TA	TA	AA	TT	TT	AA	TT	TA	AA	TT	TT	AA	TT	AA	TT	AA	AA	TT	TT	AA	TT	AA	AA	AA	TT	TA	AA	AA	TA	TA	AA	TA	TT	TT	AA	AA	AA	TT	AA	AA
contig64197_148	T	C	CT	CT	CT	TT	TT	CT	CT	CT	CT	TT	CT	CT	TT	CT	CT	TT	CT	CT	TT	CT	TT	TT	TT	CT	CT	CT	TT	CT	TT	TT	TT	CT	TT	TT	TT	TT	CT	TT	CT	TT	CT	TT	TT	TT	CT	TT	TT
contig29567_108	G	C	GG	GG	GG	CG	CG	GG	GG	GG	GG	CG	GG	GG	CG	GG	GG	CG	GG	GG	CG	GG	CG	CG	CG	GG	GG	GG	CG	GG	CG	CG	CG	GG	CG	CG	CG	CG	GG	CG	GG	CG	GG	CG	CG	CG	GG	CG	CG
contig800160_31	T	C	TT	TT	TT	CT	CT	TT	TT	TT	TT	CT	TT	TT	CT	TT	TT	CT	TT	TT	CT	TT	CT	CT	CT	TT	TT	TT	CT	TT	CT	CT	CT	TT	CT	CT	CT	CT	TT	CT	TT	CT	TT	CT	CT	CT	TT	CT	CT
contig29567_88	T	A	TT	TT	TT	AT	AT	TT	TT	TT	TT	AT	TT	TT	AT	TT	TT	AT	TT	TT	AT	TT	AT	AT	AT	TT	TT	TT	AT	TT	AT	AT	AT	TT	AT	AT	AT	AT	TT	AT	TT	AT	TT	AT	AT	AT	TT	AT	AT
contig650817_95	G	A	GG	GG	GG	AG	AG	GG	GG	GG	GG	AG	GG	GG	AG	GG	GG	AG	GG	GG	AG	GG	AG	AG	AG	GG	GG	GG	AG	GG	AG	AG	AG	GG	AG	AG	AG	AG	GG	AG	GG	AG	GG	AG	AG	AG	GG	AG	AG
contig28928_150	T	A	AT	AT	AT	TT	TT	AT	AT	AT	AT	TT	AT	AT	TT	AT	AT	TT	AT	AT	TT	AT	TT	TT	TT	AT	AT	AT	TT	AT	TT	TT	TT	AT	TT	TT	TT	TT	AT	TT	AT	TT	AT	TT	TT	TT	AT	TT	TT
contig30242_176	A	G	GA	GA	GA	AA	AA	GA	GA	GA	GA	AA	GA	GA	AA	GA	GA	AA	GA	GA	AA	GA	AA	AA	AA	GA	GA	GA	AA	GA	AA	AA	AA	GA	AA	AA	AA	AA	GA	AA	GA	AA	GA	AA	AA	AA	GA	AA	AA
contig64197_198	A	C	CA	CA	CA	AA	AA	CA	CA	CA	CA	AA	CA	CA	AA	CA	CA	AA	CA	CA	AA	CA	AA	AA	AA	CA	CA	CA	AA	CA	AA	AA	AA	CA	AA	AA	AA	AA	CA	AA	CA	AA	CA	AA	AA	AA	CA	AA	AA
contig64197_36	A	G	AA	AA	AA	GA	GA	AA	AA	AA	AA	GA	AA	AA	GA	AA	AA	GA	AA	AA	GA	AA	GA	GA	GA	AA	AA	AA	GA	AA	GA	GA	GA	AA	GA	GA	GA	GA	AA	GA	AA	GA	AA	GA	GA	GA	AA	GA	GA
contig43231_62	T	G	TT	TT	TT	GT	GT	TT	TT	TT	TT	GT	TT	TT	GT	TT	TT	GT	TT	TT	GT	TT	GT	GT	GT	TT	TT	TT	GT	TT	GT	GT	GT	TT	GT	GT	GT	GT	TT	GT	TT	GT	TT	GT	GT	GT	TT	GT	GT
contig62153_81	T	G	TT	TT	TT	GT	GT	TT	TT	TT	TT	GT	TT	TT	GT	TT	TT	GT	TT	TT	GT	TT	GT	GT	GT	TT	TT	TT	GT	TT	GT	GT	GT	TT	GT	GT	GT	GT	TT	GT	TT	GT	TT	GT	GT	GT	TT	GT	GT
contig40207_240	C	T	CC	CC	CC	TC	TC	CC	CC	CC	CC	TC	CC	CC	TC	CC	CC	TC	CC	CC	TC	CC	TC	TC	TC	CC	CC	CC	TC	CC	TC	TC	TC	CC	TC	TC	TC	TC	CC	TC	CC	TC	CC	TC	TC	TC	CC	TC	TC
contig30242_66	C	T	CC	CC	CC	TC	TC	CC	CC	CC	CC	TC	CC	CC	TC	CC	CC	TC	CC	CC	TC	CC	TC	TC	TC	CC	CC	CC	TC	CC	TC	TC	TC	CC	TC	TC	TC	TC	CC	TC	CC	TC	CC	TC	TC	TC	CC	TC	TC
contig64197_146	C	A	AC	AC	AC	CC	CC	AC	AC	AC	AC	CC	AC	AC	CC	AC	AC	CC	AC	AC	CC	AC	CC	CC	CC	AC	AC	AC	CC	AC	CC	CC	CC	AC	CC	CC	CC	CC	AC	CC	AC	CC	AC	CC	CC	CC	AC	CC	CC
contig822520_166	A	T	TT	TT	TT	AA	AA	TA	TA	TA	TA	AA	TA	TA	AA	TA	TA	AA	TA	TT	AA	TA	AA	AA	AA	AA	TT	TT	AA	TA	AA	AA	AA	TT	AA	AA	AA	AA	TA	AA	TA	AA	TA	AA	AA	AA	TA	AA	AA
contig62153_124	G	A	GG	GG	GG	AG	AG	GG	GG	GG	GG	AG	GG	GG	AG	GG	GG	AG	GG	GG	AG	GG	AG	AG	AG	GG	GG	GG	AG	GG	AG	AG	AG	GG	AG	AG	AG	AG	GG	AG	GG	AG	GG	AG	AG	AG	GG	AG	AG
contig62153_77	A	T	AA	AA	AA	TA	TA	AA	AA	AA	AA	TA	AA	AA	TA	AA	AA	TA	AA	AA	TA	AA	TA	TA	TA	AA	AA	AA	TA	AA	TA	TA	TA	AA	TA	TA	TA	TA	AA	TA	AA	TA	AA	TA	TA	TA	AA	TA	TA
contig43231_84	C	T	CC	CC	CC	TC	TC	CC	CC	CC	CC	TC	CC	CC	TC	CC	CC	TT	CC	CC	TC	CC	TC	TC	TT	CC	CC	CC	TC	CC	TC	TC	TC	CC	TC	TC	TC	TC	CC	TC	CC	TC	CC	TC	TC	TC	CC	TC	TC
contig16946_259	T	C	CT	CT	CT	TT	TT	CT	CT	CT	CT	TT	CT	CT	TT	CT	CT	TT	CT	CT	TT	CT	TT	TT	TT	CT	CT	CT	TT	CT	TT	TT	TT	CT	TT	TT	TT	TT	CT	TT	CT	TT	TT	TT	TT	TT	CT	TT	TT
contig30242_174	A	G	AA	AA	AA	GA	GA	AA	AA	AA	AA	GA	AA	AA	GA	AA	AA	GA	AA	AA	GA	AA	GA	GA	GA	AA	AA	AA	GA	AA	GA	GA	GA	AA	GA	GA	GA	GA	AA	GA	AA	GA	AA	GA	GA	GA	AA	GA	GA
contig24601_228	T	G	GT	GT	GT	TT	TT	GT	GT	GT	GT	TT	GT	GT	TT	GT	GT	TT	GT	GT	TT	GT	TT	TT	TT	GT	GT	GT	TT	GT	TT	TT	TT	GT	TT	TT	TT	TT	GT	TT	GT	TT	GT	TT	TT	GT	GT	TT	TT
contig30242_161	G	A	GG	GG	GG	AG	AG	GG	GG	GG	GG	AG	GG	GG	AG	GG	GG	AG	GG	GG	AG	GG	AG	AG	AG	GG	GG	GG	AG	GG	AG	AG	AG	GG	AG	AG	AG	AG	GG	AG	GG	AG	GG	AG	AG	AG	GG	AG	AG
contig62153_152	G	A	GG	GG	GG	AG	AG	GG	GG	GG	GG	AG	GG	GG	AG	GG	GG	AG	GG	GG	AG	GG	AG	AG	AG	GG	GG	GG	AG	GG	AG	AG	AG	GG	AG	AG	AG	AG	GG	AG	GG	AG	GG	AG	AG	AG	GG	AG	AG
contig552703_9	A	T	TA	TA	TA	AA	AA	TA	TA	TA	TA	AA	TA	TA	AA	TA	TA	AA	TA	TA	AA	TA	AA	AA	AA	TA	TA	TA	AA	TA	AA	AA	AA	TA	AA	AA	AA	AA	TA	AA	TA	AA	TA	AA	AA	TA	TA	AA	AA
contig51042_127	A	T	AA	AA	AA	TA	TA	AA	AA	AA	AA	TA	AA	AA	TA	AA	AA	TA	AA	AA	TA	AA	TA	TA	TA	AA	AA	AA	TA	AA	TA	TA	TA	AA	TA	TA	TA	TA	AA	TA	AA	TA	AA	TA	TA	AA	AA	TA	TA
contig64197_7	C	T	CC	CC	CC	TC	TC	CC	CC	CC	CC	TC	CC	CC	TC	CC	CC	TC	CC	CC	TC	CC	TC	TC	TC	CC	CC	CC	TC	CC	TC	TC	TC	CC	TC	TC	TC	TC	CC	TC	CC	TC	CC	TC	TC	CC	CC	TC	TC
contig635280_196	G	A	GG	GG	GG	AG	AG	GG	GG	GG	GG	AG	GG	GG	AG	GG	GG	AG	GG	GG	AG	GG	AG	AG	AG	GG	GG	GG	AG	GG	AG	AG	AG	GG	AG	AG	AG	AG	GG	AG	GG	AG	GG	AG	AG	AG	GG	AG	AG
contig16946_103	G	A	AG	AG	AG	GG	GG	AG	AG	AG	AG	GG	AG	AG	GG	AG	AG	GG	AG	AG	GG	AG	GG	GG	GG	AG	AG	AG	GG	AG	GG	GG	GG	AG	GG	GG	GG	GG	AG	GG	AG	GG	GG	GG	GG	GG	AG	GG	GG
contig30242_179	C	T	CC	CC	CC	TC	TC	CC	CC	CC	CC	TC	CC	CC	TC	CC	CC	TC	CC	CC	TC	CC	TC	TC	TC	CC	CC	CC	TC	CC	TC	TC	TC	CC	TC	TC	TC	TC	CC	TC	CC	TC	CC	TC	TC	TC	CC	TC	TC
contig687360_153	C	T	CC	CC	CC	TC	TC	CC	CC	CC	CC	TC	CC	TC	TC	CC	CC	TC	CC	CC	TC	CC	TC	TC	TC	CC	CC	CC	TC	CC	TC	TC	TC	CC	TC	TC	TC	TC	CC	TC	CC	TC	CC	TC	TC	TC	CC	TC	TC
contig811505_52	A	G	AA	GA	AA	GA	GA	AA	GA	GA	AA	AA	AA	AA	GA	AA	AA	GA	AA	AA	GA	AA	GA	AA	GA	AA	AA	AA	GA	AA	GA	GA	GA	AA	AA	GA	AA	AA	GA	AA	AA	AA	AA	AA	AA	AA	GA	AA	GA
contig795465_203	G	A	GG	GG	GG	AG	AG	GG	GG	GG	GG	AG	GG	AG	AG	GG	GG	AG	GG	GG	AG	GG	AG	AG	AG	GG	GG	GG	AG	GG	AG	AG	AG	GG	AG	AG	AG	AG	GG	AG	GG	AG	GG	AG	AG	AG	GG	AG	AG
contig494491_83	G	A	GG	GG	GG	AG	AG	GG	GG	GG	GG	AG	GG	GG	AG	GG	GG	AG	GG	GG	AG	GG	AG	AG	AG	GG	GG	GG	AG	GG	AG	AG	AG	GG	AG	AG	AG	AG	GG	AG	GG	AG	GG	AG	AG	AG	GG	AG	AG
contig53238_106	C	G	CC	GC	CC	GC	GC	CC	GC	GC	GC	CC	CC	CC	GC	CC	GC	GC	CC	CC	GC	CC	GC	CC	GC	GC	GC	CC	GC	CC	GC	GC	GC	CC	CC	GC	GC	CC	GC	GC	GC	CC	CC	GC	GC	CC	GC	GC	GC
contig930035_127	C	T	CC	TC	CC	TC	TC	CC	TC	TC	TC	CC	CC	CC	TC	CC	TC	TC	CC	CC	TC	CC	TC	CC	TC	TC	TC	CC	TC	CC	TC	TC	TC	CC	CC	TC	TC	CC	TC	TC	TC	CC	CC	TC	TC	CC	TC	CC	TC
contig9749_15	A	G	GA	AA	GA	AA	AA	GA	AA	AA	AA	GA	GA	GA	AA	GA	AA	AA	GA	GA	AA	GA	AA	GA	AA	AA	AA	GA	AA	GA	AA	AA	AA	GA	GA	AA	AA	GA	AA	AA	AA	GA	GA	AA	AA	GA	AA	GA	AA
contig930035_168	T	A	TT	AT	TT	AT	AT	TT	AT	AT	AT	TT	TT	TT	AT	TT	AT	AT	TT	TT	AT	TT	AT	TT	AT	AT	AT	TT	AT	TT	AT	AT	AT	TT	TT	AT	AT	TT	AT	AT	AT	TT	TT	AT	AT	TT	AT	TT	AT
contig51042_176	C	A	CC	AC	CC	AC	AC	CC	AC	AC	AC	CC	CC	CC	AC	CC	AC	AC	CC	CC	AC	CC	AC	CC	AC	AC	AC	CC	AC	CC	AC	AC	AC	CC	CC	AC	AC	CC	AC	AC	AC	CC	CC	AC	AC	CC	AC	CC	AC
contig51042_158	C	T	TC	CC	TC	CC	CC	TC	CC	CC	CC	TC	TC	TC	CC	TC	CC	CC	TC	TC	CC	TC	CC	TC	CC	CC	CC	TC	CC	TC	CC	CC	CC	TC	TC	CC	CC	TC	CC	CC	CC	TC	TC	CC	CC	TC	CC	TC	CC
contig930035_159	G	A	GG	AG	GG	AG	AG	GG	AG	AG	AG	GG	GG	GG	AG	GG	AG	AG	GG	GG	AG	GG	AG	GG	AG	AG	AG	GG	AG	GG	AG	AG	AG	GG	GG	AG	AG	GG	AG	AG	AG	GG	GG	AG	AG	GG	GG	GG	AG
contig552703_46	T	C	TT	CT	TT	CT	CT	TT	CT	CT	CT	TT	TT	TT	CT	TT	CT	CT	TT	TT	CT	TT	CT	TT	CT	CT	CT	TT	CT	TT	CT	CT	CT	TT	TT	CT	CT	TT	CT	CT	CT	TT	TT	CT	CT	TT	TT	TT	CT
contig7344_26	G	A	GG	GG	GG	AG	AG	GG	GG	GG	GG	AG	GG	AG	AG	GG	GG	AG	GG	GG	AG	GG	AG	AG	AG	GG	GG	GG	AG	GG	AG	AG	AG	GG	AG	AG	AG	AG	GG	AG	GG	AG	GG	AG	AG	AG	GG	AG	AG
contig9749_93	G	C	CG	CG	CG	GG	GG	CG	CG	CC	CG	GG	CG	GG	GG	CG	CG	GG	CG	CG	GG	CG	GG	GG	GG	CG	CG	CG	GG	CG	GG	GG	GG	CG	GG	GG	GG	GG	CG	GG	CG	GG	CG	GG	GG	GG	CC	GG	GG
contig832184_138	T	C	TT	TT	TT	CT	CT	TT	TT	TT	TT	CT	TT	CT	CT	TT	TT	CT	TT	TT	CT	TT	CT	CT	CT	TT	TT	TT	CT	TT	CT	CT	CT	TT	CT	CT	CT	CT	TT	CT	TT	CT	TT	CT	CT	CT	TT	CT	CT
contig697348_56	T	G	GT	GT	GT	TT	TT	GT	GT	GT	GT	TT	GT	TT	TT	GT	GT	TT	GT	GT	TT	GT	TT	TT	TT	GT	GT	GT	TT	GT	TT	TT	TT	GT	TT	TT	TT	TT	GT	TT	GT	TT	GT	TT	TT	TT	GT	TT	TT
contig494491_110	G	A	AG	AG	AG	GG	GG	AG	AG	AG	AG	GG	AG	GG	GG	AG	AG	GG	AG	AG	GG	AG	GG	GG	GG	AG	AG	AG	GG	AG	GG	GG	GG	AG	GG	GG	GG	GG	AG	GG	AG	GG	AG	GG	GG	GG	AG	GG	GG
contig645987_11	G	A	GG	GG	GG	AG	AG	GG	GG	GG	GG	AG	GG	AG	AG	GG	GG	AG	GG	GG	AG	GG	AG	AG	AG	GG	GG	GG	AG	GG	AG	AG	AG	GG	AG	AG	AG	AG	GG	AG	GG	AG	GG	AG	AG	AG	GG	AG	AG
contig635280_74	C	T	CC	CC	CC	TC	TC	CC	CC	CC	CC	TC	CC	TC	TC	CC	CC	TC	CC	CC	TC	CC	TC	TC	TC	CC	CC	CC	TC	CC	TC	TC	TC	CC	TC	TC	TC	TC	CC	TC	CC	TC	CC	TC	TC	TC	CC	TC	TC
contig69269_198	T	G	GT	GT	GT	TT	TT	GT	GT	GT	GT	TT	GT	TT	TT	GT	GT	TT	GT	GT	TT	GT	TT	TT	TT	GT	GT	GT	TT	GT	TT	TT	TT	GT	TT	TT	TT	TT	GT	TT	GT	TT	GT	TT	GT	GT	GT	TT	TT
contig409218_81	G	T	GG	GG	GG	TG	TG	GG	GG	GG	GG	TG	GG	TG	TG	GG	GG	TG	GG	GG	TG	GG	TG	TG	TG	GG	GG	GG	TG	GG	TG	TG	TG	GG	TG	TG	TG	TG	GG	TG	GG	TG	GG	TG	TG	TG	GG	TG	TG
contig252292_39	C	T	CC	CC	CC	TC	TC	CC	CC	CC	CC	TC	CC	TC	TC	CC	CC	TC	CC	CC	TC	CC	TC	TC	TC	CC	CC	CC	TC	CC	TC	TC	TC	CC	TC	TC	TC	TC	CC	TC	CC	TC	CC	TC	TC	TC	CC	TC	TC
contig645987_40	G	A	GG	GG	GG	AG	AG	GG	GG	GG	GG	AG	GG	AG	AG	GG	GG	AG	GG	GG	AG	GG	AG	AG	AG	GG	GG	GG	AG	GG	AG	AG	AG	GG	AG	AG	AG	AG	GG	AG	GG	AG	GG	AG	AG	AG	GG	AG	AG
contig24601_268	C	T	TC	TC	TC	CC	CC	TC	TC	TC	TC	CC	TC	CC	CC	TC	TC	CC	TC	TC	CC	TC	CC	CC	CC	TC	TC	TC	CC	TC	CC	CC	CC	TC	CC	CC	CC	CC	TC	CC	TC	CC	TC	CC	TC	TC	TC	CC	CC
contig7077_152	G	C	GG	CG	GG	CG	CG	GG	CG	CG	CG	GG	GG	GG	CG	GG	CG	CG	GG	GG	CG	GG	CG	GG	CG	CG	CG	GG	CG	GG	CG	CG	CG	GG	GG	CG	CG	GG	CG	GG	CG	GG	GG	CG	GG	GG	CG	GG	CG
contig9749_14	G	A	AG	AA	AG	GG	GG	AG	AG	AA	AG	GG	AG	GG	GG	AG	AG	GG	AG	AG	GG	AG	GG	GG	GG	AG	AG	AG	GG	AG	GG	GG	GG	AG	GG	GG	GG	GG	AG	GG	AG	GG	AG	GG	GG	GG	AA	GG	GG
contig37053_224	T	C	CT	CT	CT	TT	TT	CT	CT	CT	CT	TT	CT	TT	TT	CT	CT	TT	CT	CT	TT	CT	TT	TT	TT	CT	CT	CT	TT	CT	TT	TT	TT	CT	TT	TT	TT	TT	CT	TT	CT	TT	CT	TT	TT	TT	CT	TT	TT
contig36172_9	C	T	TC	TC	TC	CC	CC	TC	TC	TC	TC	CC	TC	CC	CC	TC	TC	CC	TC	TC	CC	TC	CC	CC	CC	TC	TC	TC	CC	TC	CC	CC	CC	TC	CC	CC	CC	CC	TC	CC	TC	CC	TC	CC	CC	TC	TC	CC	CC
contig49084_109	G	A	AG	AG	AG	GG	GG	AG	AG	AG	AG	GG	AG	GG	GG	AG	AG	GG	AG	AG	GG	AG	GG	GG	GG	AG	AG	AG	GG	AG	GG	GG	GG	AG	GG	GG	GG	GG	AG	GG	AG	GG	AG	GG	GG	AG	AG	GG	GG
contig29567_156	C	A	AC	AC	AC	CC	CC	CC	AC	AC	AC	CC	AC	CC	CC	AC	AC	CC	AC	AC	CC	AC	CC	CC	CC	AC	AC	AC	CC	AC	CC	CC	CC	AC	CC	CC	CC	CC	AC	CC	AC	CC	AC	CC	CC	CC	AC	CC	CC
contig521701_34	T	A	AT	AT	AT	TT	TT	AT	AT	AT	AT	TT	AT	TT	TT	AT	AT	TT	AT	AT	TT	AT	TT	TT	TT	AT	AT	AT	TT	AT	TT	TT	TT	AT	TT	TT	TT	TT	AT	TT	AT	TT	AT	TT	TT	TT	AT	TT	TT
contig500313_98	A	T	AA	AA	AA	TA	TA	AA	AA	AA	AA	TA	AA	TA	TA	AA	AA	TA	AA	AA	TA	AA	TA	TA	TA	AA	AA	AA	TA	AA	TA	TA	TA	AA	TA	TA	TA	TA	AA	TA	AA	TA	AA	TA	AA	TA	AA	TA	TA
contig430163_146	A	C	AA	CA	AA	CA	CA	AA	CA	CA	CA	AA	AA	AA	CA	AA	CA	CA	AA	AA	CA	AA	CA	AA	CA	CA	CA	AA	CA	AA	CA	CA	CA	AA	AA	CA	CA	AA	CA	AA	CA	AA	AA	CA	AA	AA	CA	AA	CA
contig38319_274	C	T	TC	TC	TC	CC	CC	TC	TC	TC	TC	CC	TC	CC	CC	TC	TC	CC	CC	TC	CC	TC	CC	CC	CC	TC	TC	TC	CC	TC	CC	CC	CC	TC	CC	CC	CC	CC	TC	CC	TC	CC	TC	CC	CC	TC	TC	CC	CC
contig28636_94	A	C	CA	CA	CA	AA	AA	CA	CA	CA	CA	AA	CA	AA	AA	CA	CA	AA	CA	CA	AA	CA	AA	AA	AA	CA	CA	CA	AA	CA	AA	AA	AA	CA	AA	AA	AA	AA	CA	AA	CA	AA	CA	AA	AA	AA	CA	AA	AA
contig48690_85	G	A	GG	GG	GG	AG	AG	GG	GG	GG	GG	AG	GG	AG	AG	GG	GG	AG	GG	GG	AG	GG	AG	AG	AG	GG	GG	GG	AG	GG	AG	AG	AG	GG	AG	AG	AG	AG	GG	AG	GG	AG	GG	AG	GG	GG	GG	AG	AG
contig495891_31	A	G	AA	GA	AA	GA	GA	AA	GA	GA	GA	AA	AA	AA	GA	AA	GA	GA	AA	AA	GA	AA	GA	AA	GA	GA	GA	AA	GA	AA	GA	GA	GA	AA	AA	GA	GA	AA	GA	AA	GA	AA	AA	GA	AA	AA	GA	AA	GA
contig37053_196	T	A	TT	TT	TT	AT	AT	TT	TT	TT	TT	AT	TT	AT	AT	TT	TT	AT	TT	TT	AT	TT	AT	AT	AT	TT	TT	TT	AT	TT	AT	AT	AT	TT	AT	AT	AT	AT	TT	AT	TT	AT	TT	AT	TT	TT	TT	AT	AT
contig635280_232	G	T	TG	TG	TG	GG	GG	TG	TG	TG	TG	GG	TG	GG	GG	TG	TG	GG	TG	TG	GG	TG	GG	GG	GG	TG	TG	TG	GG	TG	GG	GG	GG	TG	GG	GG	GG	GG	TG	GG	TG	GG	TG	GG	TG	TG	TG	GG	GG
contig687360_117	G	C	GG	CG	GG	CG	CG	GG	CG	CG	CG	GG	GG	GG	CG	GG	CG	CG	GG	GG	CG	GG	CG	GG	CG	CG	CG	GG	CG	GG	CG	CG	CG	GG	GG	CG	CG	GG	CG	GG	CG	GG	GG	CG	GG	GG	GG	GG	CG
contig26532_9	C	G	GC	CC	GC	CC	CC	GC	CC	CC	CC	GC	GC	GC	CC	GC	CC	CC	GC	GC	CC	GC	CC	GC	CC	CC	CC	GC	CC	GC	CC	CC	CC	GC	GC	CC	CC	GC	CC	GC	CC	GC	GC	CC	GC	GC	GC	GC	CC
contig447263_33	C	T	CC	CC	CC	TC	TC	CC	CC	CC	CC	TC	CC	TC	TC	CC	CC	TC	CC	CC	TC	CC	TC	TC	TC	CC	CC	CC	TC	CC	TC	TC	TC	CC	TC	TC	TC	TC	CC	TC	CC	TC	CC	TC	CC	CC	CC	TC	TC
contig28636_99	C	T	CC	TC	CC	TC	TC	CC	TC	TC	TC	CC	CC	CC	TC	CC	TC	TC	CC	CC	TC	CC	TC	CC	TC	TC	TC	CC	TC	CC	TC	TC	TC	CC	CC	TC	TC	CC	TC	CC	TC	CC	CC	TC	CC	CC	CC	CC	TC
contig28636_138	A	C	CA	CA	CA	AA	AA	CA	CA	CA	CA	AA	CA	AA	AA	CA	CA	AA	CA	CA	AA	CA	AA	AA	AA	CA	CA	CA	AA	CA	AA	AA	AA	CA	AA	AA	AA	AA	CA	AA	CA	AA	CA	AA	CA	CA	CA	AA	AA
contig49084_119	A	T	AA	TA	AA	TA	TA	AA	TA	TA	TA	AA	AA	AA	TA	AA	TA	TA	AA	AA	TA	AA	TA	AA	TA	TA	TA	AA	TA	AA	TA	TA	TA	AA	AA	TA	TA	AA	TA	AA	TA	AA	AA	TA	AA	AA	AA	AA	TA
contig40356_226	C	T	TC	TC	TC	CC	CC	TC	TC	TC	TC	CC	TC	CC	CC	TC	TC	CC	TC	TC	CC	TC	CC	CC	CC	TC	TC	TC	CC	TC	CC	CC	CC	TC	CC	CC	CC	CC	TC	CC	TC	CC	TC	CC	TC	TC	TC	CC	CC
contig49084_169	G	A	AG	GG	AG	GG	GG	AG	GG	GG	GG	AG	AG	AG	GG	AG	GG	GG	AG	AG	GG	AG	GG	AG	GG	GG	GG	AG	GG	AG	GG	GG	GG	AG	AG	GG	GG	AG	GG	AG	GG	AG	AG	GG	AG	AG	AG	AG	GG
contig28928_256	G	C	CG	GG	CG	GG	GG	CG	GG	GG	GG	CG	CG	CG	GG	CG	GG	GG	CG	CG	GG	CG	GG	CG	GG	GG	GG	CG	GG	CG	GG	GG	GG	CG	CG	GG	GG	CG	GG	CG	GG	CG	CG	GG	CG	CG	GG	CG	GG
contig43231_179	C	G	CC	GC	CC	GC	GC	CC	GC	GC	GC	CC	CC	CC	GC	CC	GC	GC	CC	CC	GC	CC	GC	CC	GC	GC	GC	CC	GC	CC	GC	GC	GC	CC	CC	GC	GC	CC	GC	CC	GC	CC	CC	GC	CC	CC	CC	CC	GC
contig64197_132	T	C	TT	CT	TT	CT	CT	TT	CT	CT	CT	TT	TT	TT	CT	TT	CT	CT	TT	TT	CT	TT	CT	TT	CT	CT	CT	TT	CT	TT	CT	CT	CT	TT	TT	CT	CT	TT	CT	TT	CT	TT	TT	CT	TT	TT	CT	TT	CT
contig687360_123	C	T	TC	CC	TC	CC	CC	TC	CC	CC	CC	TC	TC	TC	CC	TC	CC	CC	TC	TC	CC	TC	CC	TC	CC	CC	CC	TC	CC	TC	CC	CC	CC	TC	TC	CC	CC	TC	CC	TC	CC	TC	TC	CC	TC	TC	CC	TC	CC
contig16946_233	A	T	AA	TA	AA	TA	TA	AA	TA	TA	TA	AA	AA	AA	TA	AA	TA	TA	AA	AA	TA	AA	TA	AA	TA	TA	TA	AA	TA	AA	TA	TA	TA	AA	AA	TA	TA	AA	TA	AA	TA	AA	AA	TA	AA	AA	TA	AA	TA
contig24378_158	T	G	TT	GT	TT	GT	GT	TT	GT	GT	GT	TT	TT	TT	GT	TT	GT	GT	TT	TT	GT	TT	GT	TT	GT	GT	GT	TT	GT	TT	GT	GT	GT	TT	TT	GT	GT	TT	GT	TT	GT	TT	TT	GT	TT	TT	GT	TT	GT
contig40207_270	A	G	GA	AA	GA	AA	AA	GA	AA	AA	AA	GA	GA	GA	AA	GA	AA	AA	GA	GA	AA	GA	AA	GA	AA	AA	AA	GA	AA	GA	AA	AA	AA	GA	GA	AA	AA	GA	AA	GA	AA	GA	GA	AA	GA	GA	AA	GA	AA
contig28928_118	A	T	TA	AA	TA	AA	AA	TA	AA	AA	AA	TA	TA	TA	AA	TA	AA	AA	TA	TA	AA	TA	AA	TA	AA	AA	AA	TA	AA	TA	AA	AA	AA	TA	TA	AA	AA	TA	AA	TA	AA	TA	TA	AA	TA	TA	AA	TA	AA
contig495891_133	A	G	AA	GA	AA	GA	GA	AA	GA	GA	GA	AA	AA	AA	GA	AA	GA	GA	AA	AA	GA	AA	GA	AA	GA	GA	GA	AA	GA	AA	GA	GA	GA	AA	AA	GA	GA	AA	GA	AA	GA	AA	AA	GA	AA	AA	GA	AA	GA
contig32239_106	G	T	TG	GG	TG	GG	GG	TG	GG	GG	GG	TG	TG	TG	GG	TG	GG	GG	TG	TG	GG	TG	GG	TG	GG	GG	GG	TG	GG	TG	GG	GG	GG	TG	TG	GG	GG	TG	GG	TG	GG	TG	TG	GG	TG	TG	GG	TG	GG
contig64197_177	T	G	TT	GT	TT	GT	GT	TT	GT	GT	GT	TT	TT	TT	GT	TT	GT	GT	TT	TT	GT	TT	GT	TT	GT	GT	GT	TT	GT	TT	GT	GT	GT	TT	TT	GT	GT	TT	GT	TT	GT	TT	TT	GT	TT	TT	GT	TT	GT
contig32239_206	A	T	TA	AA	TA	AA	AA	TA	AA	AA	AA	TA	TA	TA	AA	TA	AA	AA	TA	TA	AA	TA	AA	TA	AA	AA	AA	TA	AA	TA	AA	AA	AA	TA	TA	AA	AA	TA	AA	TA	AA	TA	TA	AA	TA	TA	AA	TA	AA
contig64197_227	T	C	CT	TT	CT	TT	TT	CT	TT	TT	TT	CT	CT	CT	TT	CT	TT	TT	CT	CT	TT	CT	TT	CT	TT	TT	TT	CT	TT	CT	TT	TT	TT	CT	CT	TT	TT	CT	TT	CT	TT	CT	CT	TT	CT	CT	TT	CT	TT
contig49084_199	G	A	GG	AG	GG	AG	AG	GG	AG	AG	AG	GG	GG	GG	AG	GG	AG	AG	GG	GG	AG	GG	AG	GG	AG	AG	AG	GG	AG	GG	AG	AG	AG	GG	GG	AG	AG	GG	AG	GG	AG	GG	GG	AG	GG	GG	AG	GG	AG
contig28636_75	C	T	CC	TC	CC	TC	TC	CC	TC	TC	TC	CC	CC	CC	TC	CC	TC	TC	CC	CC	TC	CC	TC	CC	TC	TC	TC	CC	TC	CC	TC	TC	TC	CC	CC	TC	TC	CC	TC	CC	TC	CC	CC	TC	CC	CC	CC	CC	TC
contig28928_3	C	T	TC	CC	TC	CC	CC	TC	CC	CC	CC	TC	TC	TC	CC	TC	CC	CC	TC	TC	CC	TC	CC	TC	CC	CC	CC	TC	CC	TC	CC	CC	CC	TC	TC	CC	CC	TC	CC	TC	CC	TC	TC	CC	TC	TC	CC	TC	CC
contig16946_179	G	A	AG	GG	AG	GG	GG	AG	GG	GG	GG	AG	AG	AG	GG	AG	GG	GG	AG	AG	GG	AG	GG	AG	GG	GG	GG	AG	GG	AG	GG	GG	GG	AG	AG	GG	GG	AG	GG	AG	GG	AG	AG	GG	GG	AG	GG	AG	GG
contig430163_128	A	T	TA	AA	TA	AA	AA	TA	AA	AA	AA	TA	TA	TA	AA	TA	AA	AA	TA	TA	AA	TA	AA	TA	AA	AA	AA	TA	AA	TA	AA	AA	AA	TA	TA	AA	AA	TA	AA	TA	AA	TA	TA	AA	TT	TA	TT	TA	AA
contig28928_139	T	A	AT	TT	AT	TT	TT	AT	TT	TT	TT	AT	AT	AT	TT	AT	TT	TT	AT	AT	TT	AT	TT	AT	TT	TT	TT	AT	TT	AT	TT	TT	TT	AT	AT	TT	TT	AT	TT	AT	TT	AT	AT	TT	AT	AT	TT	AT	TT
contig28928_77	T	C	CT	TT	CT	TT	TT	CT	TT	TT	TT	CT	CT	CT	TT	CT	TT	TT	CT	CT	TT	CT	TT	CT	TT	TT	TT	CT	TT	CT	TT	TT	TT	CT	CT	TT	TT	CT	TT	CT	TT	CT	CT	TT	CT	CT	TT	CT	TT
contig16946_173	G	A	AG	GG	AG	GG	GG	AG	GG	GG	GG	AG	AG	AG	GG	AG	GG	GG	AG	AG	GG	AG	GG	AG	GG	GG	GG	AG	GG	AG	GG	GG	GG	AG	AG	GG	GG	AG	GG	AG	GG	AG	AG	GG	AG	AG	GG	AG	GG
contig28636_101	T	C	TT	CT	TT	CT	CT	TT	CT	CT	CT	TT	TT	TT	CT	TT	CT	CT	TT	TT	CT	TT	CT	TT	CT	CT	CT	TT	CT	TT	CT	CT	CT	TT	TT	CT	CT	TT	CT	TT	CT	TT	TT	CT	CT	TT	CT	TT	CT
contig667406_131	G	A	GG	AG	GG	AG	AG	GG	AG	AG	AG	GG	GG	GG	AG	GG	AG	AG	GG	GG	AG	GG	AG	GG	AG	AG	AG	GG	AG	GG	AG	AG	AG	GG	GG	AG	AG	GG	AG	GG	AG	GG	GG	AG	AG	GG	AG	GG	AG
contig64197_84	T	C	TT	CT	TT	CT	CT	TT	CT	CT	CT	TT	TT	TT	CT	TT	CT	CT	TT	TT	CT	TT	CT	TT	CT	CT	CT	TT	CT	TT	CT	CT	CT	TT	TT	CT	CT	TT	CT	TT	CT	TT	TT	CT	TT	TT	CT	TT	CT
contig495891_180	G	A	GG	AG	GG	AG	AG	GG	AG	AG	AG	GG	GG	GG	AG	GG	AG	AG	GG	GG	AG	GG	AG	GG	AG	AG	AG	GG	AG	GG	AG	AG	AG	GG	GG	AG	AG	GG	AG	GG	AG	GG	GG	AG	AG	GG	AG	GG	AG
contig40207_16	C	G	CC	GC	CC	GC	GC	CC	GC	GC	GC	CC	CC	CC	GC	CC	CC	GC	CC	CC	GC	CC	GC	CC	GC	GC	GC	CC	GC	CC	GC	GC	GC	CC	CC	GC	GC	CC	GC	CC	GC	CC	CC	GC	GC	CC	GC	CC	GC
contig247250_30	G	A	GG	AG	GG	AG	AG	GG	AG	AG	AG	GG	GG	GG	AG	GG	AG	AG	GG	GG	AG	GG	AG	GG	AG	AG	AG	GG	AG	GG	AG	AG	AG	GG	GG	AG	AG	GG	AG	GG	AG	GG	GG	AG	AG	GG	AG	GG	AG
contig40207_91	G	C	CG	GG	CG	GG	GG	CG	GG	GG	GG	CG	CG	CG	GG	CG	GG	GG	CG	CG	GG	CG	GG	CG	GG	GG	GG	CG	GG	CG	GG	GG	GG	CG	CG	GG	GG	CG	GG	CG	GG	CG	CG	GG	GG	CG	GG	CG	GG
contig40207_17	C	T	CC	TC	CC	TC	TC	CC	TC	TC	TC	CC	CC	CC	TC	CC	TC	TC	CC	CC	TC	CC	TC	CC	TC	TC	TC	CC	TC	CC	TC	TC	TC	CC	CC	TC	TC	CC	TC	CC	TC	CC	CC	TC	TC	CC	TC	CC	TC
contig24601_114	G	A	GG	AG	GG	AA	AA	GG	AG	AG	AG	AG	GG	AG	AA	GG	AG	AA	GG	GG	AA	GG	AA	AG	AA	AG	AG	GG	AA	GG	AA	AA	AA	GG	AG	AA	AA	AG	AG	AG	AG	AG	GG	AA	AA	GG	GG	AG	AA
contig28636_164	G	A	GG	AG	GG	AG	AG	GG	AG	AG	AG	GG	GG	GG	AG	GG	AG	AG	GG	GG	AG	GG	AG	GG	AG	AG	AG	GG	AG	GG	AG	AG	AG	GG	GG	AG	AG	GG	AG	GG	AG	GG	GG	AG	AG	GG	AG	GG	AG
contig24378_234	A	T	AA	TA	AA	TA	TA	AA	TA	TA	TA	AA	AA	AA	TA	AA	TA	TA	AA	AA	TA	AA	TA	AA	TA	TA	TA	AA	TA	AA	TA	TA	TA	AA	AA	TA	TA	AA	TA	AA	TA	AA	AA	TA	TA	AA	TA	AA	TA
contig428703_77	C	A	CC	AC	CC	AC	AC	CC	AC	AC	AC	CC	CC	CC	AC	CC	AC	AC	CC	CC	AC	CC	AC	CC	AC	AC	AC	CC	AC	CC	AC	AC	AC	CC	CC	AC	AC	CC	AC	CC	AC	CC	CC	AC	AC	CC	CC	CC	AC
contig428703_69	T	C	TT	CT	TT	CT	CT	TT	CT	CT	CT	TT	TT	TT	CT	TT	CT	CT	TT	TT	CT	TT	CT	TT	CT	CT	CT	TT	CT	TT	CT	CT	CT	TT	TT	CT	CT	TT	CT	TT	CT	TT	TT	CT	CT	TT	TT	TT	CT
contig447263_10	C	T	TC	CC	TC	CC	CC	TC	CC	CC	CC	TC	TC	TC	CC	TC	CC	CC	TC	TC	CC	TC	CC	TC	CC	CC	CC	TC	CC	TC	CC	CC	CC	TC	TC	CC	CC	TC	CC	TC	CC	TC	TC	CC	CC	TC	CC	TC	CC
contig24601_116	C	T	TC	CC	TC	CC	CC	TC	CC	CC	CC	TC	TC	TC	CC	TC	CC	CC	TC	TC	CC	TC	CC	TC	CC	CC	CC	TC	CC	TC	CC	CC	CC	TC	TC	CC	CC	TC	CC	TC	CC	TC	TC	CC	CC	TC	TC	TC	CC
contig30242_10	A	T	AA	TA	AA	TA	TA	AA	TA	TA	TA	AA	AA	AA	TA	AA	TA	TA	AA	AA	TA	AA	TA	AA	TA	TA	TA	AA	TA	AA	TA	TA	TA	AA	AA	TA	TA	AA	TA	AA	TA	AA	AA	TA	TA	AA	TA	AA	TA
contig16946_116	A	C	CA	AA	CA	AA	AA	CA	AA	AA	AA	CA	CA	CA	AA	CA	AA	AA	CA	CA	AA	CA	AA	CA	AA	AA	AA	CA	AA	CA	AA	AA	AA	CA	CA	AA	AA	CA	AA	CA	AA	CA	CA	AA	AA	CA	CA	CA	AA
contig28636_151	C	T	CC	TC	CC	TC	TC	CC	TC	TC	TC	CC	CC	CC	TC	CC	TC	TC	CC	CC	TC	CC	TC	CC	TC	TC	TC	CC	TC	CC	TC	TC	TC	CC	CC	TC	TC	CC	TC	CC	TC	CC	CC	TC	TC	CC	CC	CC	TC
contig9868_169	A	T	AA	TA	AA	TA	TA	AA	TA	TA	TA	AA	AA	AA	TA	AA	TA	TA	AA	AA	TA	AA	TA	AA	TA	TA	TA	AA	TA	AA	TA	TA	TA	AA	AA	TA	TA	AA	TA	AA	TA	AA	AA	TA	AA	AA	TA	AA	TA
contig49084_89	G	A	AG	GG	AG	GG	GG	AG	GG	GG	GG	AG	AG	AG	GG	AG	GG	GG	AG	AG	GG	AG	GG	AG	GG	GG	GG	AG	GG	AG	GG	GG	GG	AG	AG	GG	GG	AG	GG	AG	GG	AG	AG	GG	GG	AG	AG	AG	GG
contig37053_197	C	G	CC	GC	CC	GC	GC	CC	GC	GC	GC	CC	CC	CC	GC	CC	GC	GC	CC	CC	GC	CC	GC	CC	GC	GC	GC	CC	GC	CC	GC	GC	GC	CC	CC	GC	GC	CC	GC	CC	GC	CC	CC	GC	CC	CC	GC	CC	GC
contig64197_47	G	T	TG	GG	TG	GG	GG	TG	GG	GG	GG	TG	TG	TG	GG	TG	GG	GG	TG	TG	GG	TG	GG	TG	GG	GG	GG	TG	GG	TG	GG	GG	GG	TG	TG	GG	GG	TG	GG	TG	GG	TG	TG	GG	GG	TG	GG	TG	GG
contig37053_164	A	G	AA	GA	AA	GA	GA	AA	GA	GA	GA	AA	AA	AA	GA	AA	GA	GA	AA	AA	GA	AA	GA	AA	GA	GA	GA	AA	GA	AA	GA	GA	GA	AA	AA	GA	GA	AA	GA	AA	GA	AA	AA	GA	AA	AA	GA	AA	GA
contig32239_135	A	C	AA	CA	AA	CA	CA	AA	CA	CA	CA	AA	AA	AA	CA	AA	CA	CA	AA	AA	CA	AA	CA	AA	CA	CA	CA	AA	CA	AA	CA	CA	CA	AA	AA	CA	CA	AA	CA	AA	CA	AA	AA	CA	AA	AA	CA	AA	CA
contig32239_94	C	T	TC	CC	TC	CC	CC	TC	CC	CC	CC	TC	TC	TC	CC	TC	CC	CC	TC	TC	CC	TC	CC	TC	CC	CC	CC	TC	CC	TC	CC	CC	CC	TC	TC	CC	CC	TC	CC	TC	CC	TC	TC	CC	TC	TC	CC	TC	CC
contig16946_37	C	T	TC	CC	TC	CC	CC	TC	CC	CC	CC	TC	TC	TC	CC	TC	CC	CC	TC	TC	CC	TC	CC	TC	CC	CC	CC	TC	CC	TC	CC	CC	CC	TC	TC	CC	CC	TC	CC	TC	CC	TC	TC	CC	TC	TC	CC	TC	CC
contig24378_81	T	C	TT	CT	TT	CT	CT	TT	CT	CT	CT	TT	TT	TT	CT	TT	CT	CT	TT	TT	CT	TT	CT	TT	CT	CT	CT	TT	CT	TT	CT	CT	CT	TT	TT	CT	CT	TT	CT	TT	CT	TT	TT	CT	CC	TT	CT	TT	CT
contig46939_196	G	A	GG	AG	GG	AA	AA	GG	AG	AG	AG	AG	GG	AG	AA	GG	AG	AA	GG	GG	AA	GG	AA	AG	AA	AG	AG	GG	AA	GG	AA	AA	AA	GG	AG	AA	AA	AG	AG	AG	AG	AG	GG	AA	AG	AG	AG	AG	AA
contig40207_15	G	T	TT	TG	TT	GG	GG	TT	TG	TG	TG	TG	TT	TT	GG	TT	GG	GG	TT	TT	GG	TT	GG	TG	GG	GG	GG	TT	GG	TT	GG	GG	GG	TT	TG	GG	GG	TG	TG	TG	TG	TG	TT	GG	TG	TT	GG	TG	GG
contig645987_10	G	A	GG	AG	GG	AG	AG	GG	AG	AG	AG	GG	GG	GG	AG	GG	AG	AG	GG	GG	AG	GG	AG	GG	AG	AG	AG	GG	AG	GG	AG	AG	AG	GG	GG	AG	AG	GG	AG	GG	AG	GG	GG	AG	GG	GG	AG	GG	AG
contig16946_161	C	A	AC	CC	AC	CC	CC	AC	CC	CC	CC	AC	AC	AC	CC	AC	CC	CC	AC	AC	CC	AC	CC	AC	CC	CC	CC	AC	CC	AC	CC	CC	CC	AC	AC	CC	CC	AC	CC	AC	CC	AC	AC	CC	AC	AC	CC	AC	CC
contig16946_59	G	A	AG	GG	AG	GG	GG	AG	GG	GG	GG	AG	AG	AG	GG	AG	GG	GG	AG	AG	GG	AG	GG	AG	GG	GG	GG	AG	GG	AG	GG	GG	GG	AG	AG	GG	GG	AG	GG	AG	GG	AG	AG	GG	AG	AG	GG	AG	GG
contig635280_84	A	G	GG	GA	GG	AA	AA	GG	GA	GA	GA	GA	GG	GG	AA	GG	AA	AA	GG	GG	AA	GG	AA	GA	AA	AA	GA	GG	AA	GG	AA	AA	AA	GG	GA	AA	AA	GA	AA	GA	GA	GA	GG	AA	GA	GG	AA	GA	AA
contig494491_65	T	C	CC	CT	CC	TT	TT	CC	CT	CT	CT	CT	CC	CC	TT	CC	CT	TT	CC	CC	TT	CC	TT	CT	TT	CT	CT	CC	TT	CC	TT	TT	TT	CC	CT	TT	TT	CT	CT	CT	CT	CT	CC	TT	TT	CC	TT	CT	TT
contig37186_192	C	T	CC	TC	CC	TC	CC	CC	TC	TC	TC	CC	CC	CC	TC	CC	TC	TC	CC	CC	TC	CC	TC	CC	TC	TC	TC	CC	TC	CC	TC	TC	TC	CC	CC	TC	TC	CC	TC	CC	TC	CC	CC	TC	CC	CC	TC	CC	TC
contig16499_145	T	C	CT	TT	CT	TT	TT	CT	TT	TT	TT	CT	CT	TT	TT	CT	TT	TT	CT	CT	TT	CT	TT	CT	TT	TT	TT	CT	TT	CT	TT	TT	TT	CT	CT	TT	TT	CT	TT	CT	TT	CT	CT	TT	TT	CT	TT	CT	TT
contig697348_36	A	C	CC	CA	CC	AA	AA	CC	CA	CA	CA	CA	CC	CA	AA	CC	AA	AA	CC	CC	AA	CC	AA	CA	AA	CA	CA	CC	AA	CC	AA	AA	AA	CC	CA	AA	AA	CA	CA	CA	CA	CA	CC	AA	AA	CC	AA	CA	AA
contig16499_166	C	T	CC	TC	CC	TC	TC	CC	TC	TC	TC	CC	CC	CC	TC	CC	TC	TC	CC	CC	TC	CC	TC	CC	TC	TC	TC	CC	TC	CC	TC	TC	TC	CC	CC	TC	TC	CC	TC	CC	TC	CC	CC	TC	CC	CC	TC	CC	TC
contig500313_144	G	C	GG	CG	GG	CG	CG	GG	CG	CG	CG	GG	GG	GG	CG	GG	CG	CG	GG	GG	CG	GG	CG	GG	CG	CG	CG	GG	CG	GG	CG	CG	CG	GG	GG	CG	CG	GG	CG	GG	CG	GG	GG	CG	GG	GG	CG	GG	CG
contig16499_229	C	T	TC	CC	TC	CC	CC	TC	CC	CC	CC	TC	TC	CC	CC	TC	CC	CC	TC	TC	CC	TC	CC	TC	CC	CC	CC	TC	CC	TC	CC	CC	CC	TC	TC	CC	CC	TC	CC	TC	CC	TC	TC	CC	CC	TC	CC	TC	CC
contig500313_149	T	C	TT	CT	TT	CT	CT	TT	CT	CT	CT	TT	TT	TT	CT	TT	CT	CT	TT	TT	CT	TT	CT	TT	CT	CT	CT	TT	CT	TT	CT	CT	CT	TT	TT	CT	CT	TT	CT	TT	CT	TT	TT	CT	TT	TT	CT	TT	CT
contig16499_110	G	A	AG	GG	AG	GG	GG	AG	GG	GG	GG	AG	AG	GG	GG	AG	GG	GG	AG	AG	GG	AG	GG	AG	GG	GG	GG	AG	GG	AG	GG	GG	GG	AG	AG	GG	GG	AG	GG	AG	GG	AG	AG	GG	GG	AG	GG	AG	GG
contig697348_85	A	G	GG	GA	GG	AA	AA	GG	GA	GA	GA	GG	GG	GA	AA	GG	AA	AA	GG	GG	AA	GG	AA	GA	AA	GA	GA	GG	AA	GG	AA	AA	AA	GG	GA	AA	AA	GA	GA	GA	GA	GA	GG	AA	AA	GG	AA	GA	AA
contig16499_233	T	C	TT	CT	TT	CT	CT	TT	CT	CT	CT	TT	TT	TT	CT	TT	CT	CT	TT	TT	CT	TT	CT	TT	CT	CT	CT	TT	CT	TT	CT	CT	CT	TT	TT	CT	CT	TT	CT	TT	CT	TT	TT	CT	CT	TT	CT	TT	CT
contig16499_167	A	G	GA	AA	GA	AA	AA	GA	AA	AA	AA	GA	GA	AA	AA	GA	AA	AA	GA	GA	GA	GA	AA	GA	AA	AA	AA	GA	AA	GA	AA	AA	AA	GA	GA	AA	AA	GA	AA	GA	AA	GA	GA	AA	AA	GA	AA	GA	AA
contig680553_106	G	A	GG	GG	GG	AG	AG	GG	GG	GG	GG	AG	GG	AG	AG	GG	GG	AG	GG	GG	AG	GG	AG	AG	AG	GG	GG	GG	AG	GG	AG	AG	AG	GG	AG	AG	AG	AG	GG	AG	GG	AG	GG	AG	AG	AG	GG	AG	AG
contig16499_165	A	G	AA	GA	AA	GA	GA	AA	GA	GA	GA	AA	AA	AA	GA	AA	GA	GA	AA	AA	AA	AA	GA	AA	GA	GA	GA	AA	GA	AA	GA	GA	GA	AA	AA	GA	GA	AA	GA	AA	GA	AA	AA	GA	GA	AA	GA	AA	GA
contig63549_73	T	C	TT	TT	TT	CT	CT	TT	TT	TT	TT	CT	TT	CT	CT	TT	TT	CT	TT	TT	CT	TT	CT	CT	CT	TT	TT	TT	CT	TT	CT	CT	CT	TT	CT	CT	CT	CT	TT	CT	TT	CT	TT	CT	CT	CT	TT	CT	CT
contig18384_11	T	C	TT	TT	TT	CT	CT	TT	TT	TT	TT	CT	TT	CT	CT	TT	TT	CT	TT	TT	CT	TT	CT	CT	CT	TT	TT	TT	TT	TT	CT	CT	CT	TT	CT	CT	CT	CT	TT	CT	TT	CT	TT	CT	TT	TT	TT	CT	CT
contig830119_25	G	A	GG	AG	GG	AG	AG	GG	AG	AG	AG	GG	GG	GG	AG	GG	AG	AG	GG	GG	GG	GG	AG	GG	AG	AG	AG	GG	AG	GG	AG	AG	AG	GG	GG	AG	AG	GG	AG	GG	AG	GG	GG	AG	AG	GG	AG	GG	AG
contig16499_161	A	T	AA	AA	AA	TA	TA	AA	AA	AA	AA	TA	AA	TA	TA	AA	AA	TA	AA	AA	TA	AA	TA	TA	TA	AA	AA	AA	TA	AA	TA	TA	TA	AA	TA	TA	TA	TA	AA	TA	AA	TA	AA	TA	AA	AA	AA	TA	TA
contig16499_116	C	T	CC	CC	CC	TC	TC	CC	CC	CC	CC	TC	CC	TC	TC	CC	CC	TC	CC	CC	TC	CC	TC	TC	TC	CC	CC	CC	TC	CC	TC	TC	TC	CC	TC	TC	TC	TC	CC	TC	CC	TC	CC	TC	CC	CC	CC	TC	TC
contig38261_223	G	A	GG	AG	GG	AG	AG	GG	AG	AG	AG	GG	GG	GG	AG	GG	AG	AG	GG	GG	GG	GG	AG	GG	AG	AG	AG	GG	AG	GG	AG	AG	AG	GG	GG	AG	AG	GG	AG	GG	AG	GG	GG	AG	AG	GG	GG	GG	AG
contig311215_185	G	A	AG	AG	AG	GG	GG	AG	AG	AG	AG	GG	AG	GG	GG	AG	AG	GG	AG	AG	GG	AG	GG	GG	GG	AG	AG	AG	GG	AG	GG	GG	GG	AG	GG	GG	GG	GG	AG	GG	AG	GG	AG	GG	AG	AG	AG	GG	GG
contig16499_163	A	T	AA	AA	AA	TA	TA	AA	AA	AA	AA	TA	AA	TA	TA	AA	AA	TA	AA	AA	TA	AA	TA	TA	TA	AA	AA	AA	TA	AA	TA	TA	TA	AA	TA	TA	TA	TA	AA	TA	AA	TA	AA	TA	AA	AA	AA	TA	TA
contig28416_118	C	T	TC	CC	TC	CC	CC	TC	CC	CC	CC	TC	TC	TC	CC	TC	CC	CC	TC	TC	TC	TC	CC	TC	CC	CC	CC	TC	CC	TC	CC	CC	CC	TC	TC	CC	CC	TC	CC	TC	CC	TC	TC	CC	TC	TC	TC	TC	CC
contig2736_155	C	T	CC	TC	CC	TC	TC	CC	TC	TC	TC	CC	CC	CC	TC	CC	TC	TC	CC	CC	CC	CC	TC	CC	TC	TC	TC	CC	TC	CC	TC	TC	TC	CC	CC	TC	TC	CC	TC	CC	TC	CC	CC	TC	CC	CC	CC	CC	TC
contig48690_43	C	T	TC	CC	TC	TC	TC	TC	CC	CC	CC	TT	TC	TT	TC	TC	CC	TC	TC	TC	TT	TC	TC	TT	TC	CC	CC	TC	TC	TC	TC	TC	TC	TC	TT	TC	TC	TT	CC	TT	CC	TT	TC	TC	CC	TT	TC	TT	TC
contig40801_113	A	G	GA	GA	GA	AA	AA	GA	GA	GA	GA	AA	GA	AA	AA	GA	GA	AA	GA	GA	AA	GA	AA	AA	AA	GA	GA	GA	AA	GA	AA	AA	AA	GA	AA	AA	AA	AA	GA	AA	GA	AA	GA	AA	GA	GA	GA	AA	AA
contig18384_130	G	A	GG	AG	GG	AG	AG	GG	AG	AG	AG	GG	GG	GG	AG	GG	AG	AG	GG	GG	GG	GG	AG	GG	AG	AG	AG	GG	AA	GG	AG	AG	AG	GG	GG	AG	AG	GG	AG	GG	AG	GG	GG	AG	GG	GG	GG	GG	AG
contig49019_115	A	C	CA	AA	CA	AA	AA	CA	AA	AA	AA	CA	CA	CA	CC	CA	AA	AA	CA	CA	CA	CA	AA	CA	AA	AA	AA	CA	AA	CA	AA	AA	AA	CA	CA	AA	AA	CA	AA	CA	AA	CA	CA	AA	CA	CA	CA	CA	AA
contig376779_135	G	A	AG	AG	AG	GG	GG	AG	AG	AG	AG	GG	AG	GG	GG	AG	AG	GG	AG	AG	GG	AG	GG	GG	GG	AG	AG	AG	GG	AG	GG	GG	GG	AG	GG	GG	GG	GG	AG	GG	AG	GG	AG	GG	AG	AG	AG	GG	GG
contig18384_54	G	A	AG	AA	AG	AG	AG	AG	AA	AA	AA	GG	AG	GG	AG	AG	AA	AG	AG	AG	GG	AG	AG	GG	AG	AA	AA	AG	AA	AG	AG	AG	AG	AG	GG	AG	AG	GG	AA	GG	AA	GG	AG	AG	AA	GG	AA	GG	AG
contig16499_146	T	C	TT	TT	TT	CT	CT	TT	TT	TT	TT	CT	TT	CT	CT	TT	TT	CT	TT	TT	CT	TT	CT	CT	CT	TT	TT	TT	CT	TT	CT	CT	CT	TT	CT	CT	CT	CT	TT	CT	TT	CT	TT	CT	TT	TT	TT	CT	CT
contig16499_44	C	T	TC	TC	TC	CC	CC	TC	TC	TC	TC	CC	TC	CC	CC	TC	TC	CC	TC	TC	CC	TC	CC	CC	CC	TC	TC	TC	CC	TC	CC	CC	CC	TC	CC	CC	CC	CC	TC	CC	TC	CC	TC	CC	TC	TC	TC	CC	CC
contig18384_28	C	T	CC	CC	CC	TC	TC	CC	CC	CC	CC	TC	CC	TC	TC	CC	CC	TC	CC	CC	TC	CC	TC	TC	TC	CC	CC	CC	CC	CC	TC	TC	TC	CC	TC	TC	TC	TC	CC	TC	CC	TC	CC	TC	CC	CC	CC	TC	TC
contig2736_135	T	C	CT	TT	CT	TT	TT	CT	TT	TT	TT	CT	CT	CT	TT	CT	TT	TT	CT	CT	CT	CT	TT	CT	TT	TT	TT	CT	TT	CT	TT	TT	TT	CT	CT	TT	TT	CT	TT	CT	TT	CT	CT	TT	TT	CT	TT	CT	TT
contig40513_131	G	T	GG	TG	GG	TG	TG	GG	TG	TG	TG	GG	GG	GG	TG	GG	TG	TG	GG	GG	GG	GG	TG	GG	TG	TG	TG	GG	TG	GG	TG	TG	TG	GG	GG	TG	TG	GG	TG	GG	TG	GG	GG	TG	TG	GG	TG	GG	TG
contig2736_182	A	G	GA	AA	GA	AA	AA	GA	AA	AA	AA	GA	GA	GA	AA	GA	AA	AA	GA	GA	GA	GA	AA	GA	AA	AA	AA	GA	AA	GA	AA	AA	AA	GA	GA	AA	AA	GA	AA	GA	AA	GA	GA	AA	AA	GA	AA	GA	AA
contig149020_40	C	T	CC	TC	CC	TC	TC	CC	TC	TC	TC	CC	CC	CC	TC	CC	TC	TC	CC	CC	CC	CC	TC	CC	TC	TC	TC	CC	TC	CC	TC	TC	TC	CC	CC	TC	TC	CC	TC	CC	TC	CC	CC	TC	TC	CC	TC	CC	TC
contig621595_91	T	A	TT	AT	TT	AT	AT	TT	AT	AT	AT	TT	TT	TT	AT	TT	AT	AT	TT	TT	TT	TT	AT	TT	AT	AT	AT	TT	AT	TT	AT	AT	AT	TT	TT	AT	AT	TT	AT	TT	AT	TT	TT	AT	AT	TT	AA	TT	AT
contig38261_176	G	C	GG	CG	GG	CG	CG	GG	CG	CG	CG	GG	GG	GG	CG	GG	CG	CG	GG	GG	GG	GG	CG	GG	CG	CG	CG	GG	CG	GG	CG	CG	CG	GG	GG	CG	CG	GG	CG	GG	CG	GG	GG	CG	CG	GG	CG	GG	CG
contig49019_56	C	T	TC	CC	TC	CC	CC	TC	CC	CC	CC	TC	TC	TC	CC	TC	CC	CC	TC	TC	TC	TC	CC	TC	CC	CC	CC	TC	CC	TC	CC	CC	CC	TC	TC	CC	CC	TC	CC	TC	CC	TC	TC	CC	TT	TC	TC	TC	CC
contig32240_208	G	A	AG	GG	AG	GG	GG	AG	GG	GG	GG	AG	AG	AG	GG	AG	GG	GG	AG	AG	AG	AG	GG	AG	GG	GG	GG	AG	GG	AG	GG	GG	GG	AG	AG	GG	GG	AG	GG	AG	GG	AG	AG	GG	GG	AG	AG	AG	GG
contig7385_115	C	G	GC	CC	GC	CC	CC	GC	CC	CC	CC	GC	GC	GC	CC	GC	CC	CC	GC	GC	GC	GC	CC	GC	CC	CC	CC	GC	CC	GC	CC	CC	CC	GC	GC	CC	CC	GC	CC	GC	CC	GC	GC	CC	CC	GC	GC	GC	CC
contig40801_161	C	T	CC	TC	CC	TC	TC	CC	TC	TC	TC	CC	CC	CC	TC	CC	TC	TC	CC	CC	CC	CC	TC	CC	TC	TC	TC	CC	TC	CC	TC	TC	TC	CC	CC	TC	TC	CC	TC	CC	TC	CC	CC	TC	CC	CC	CC	CC	TC
contig7385_165	T	G	GT	TT	GT	TT	TT	GT	TT	TT	TT	GT	GT	GT	TT	GT	TT	TT	GT	GT	GT	GT	TT	GT	TT	TT	TT	GT	TT	GT	TT	TT	TT	GT	GT	TT	TT	GT	TT	GT	TT	GT	GT	TT	TT	GT	GT	GT	TT
contig2736_148	C	A	CC	CC	CC	CC	AC	CC	CC	CC	CC	AC	CC	AC	AC	CC	CC	AC	CC	CC	AC	CC	AC	AC	AC	CC	CC	CC	AC	CC	AC	AC	AC	CC	AC	AC	AC	AC	CC	AC	CC	AC	CC	AC	CC	CC	CC	AC	AC
contig28416_69	C	T	TC	CC	TC	CC	CC	TC	CC	CC	CC	TC	TC	TC	CC	TC	CC	CC	TC	TC	TC	TC	CC	TC	CC	CC	CC	TC	CC	TC	CC	CC	CC	TC	TC	CC	CC	TC	CC	TC	CC	TC	TC	CC	CC	TC	TC	TC	CC
contig7385_162	G	A	AG	GG	AG	GG	GG	AG	GG	GG	GG	AG	AG	AG	GG	AG	GG	GG	AG	AG	AG	AG	GG	AG	GG	GG	GG	AG	GG	AG	GG	GG	GG	AG	AG	GG	GG	AG	GG	AG	GG	AG	AG	GG	GG	AG	AG	AG	GG
contig2736_40	T	C	TT	TT	TT	TT	CT	TT	TT	TT	TT	CT	TT	CT	CT	TT	TT	CT	TT	TT	CT	TT	CT	CT	CT	TT	TT	TT	CT	TT	CT	CT	CT	TT	CT	CT	CT	CT	TT	CT	TT	CT	TT	CT	CT	TT	TT	CT	CT
contig607724_127	A	T	AA	TA	AA	TA	TA	AA	TA	TA	TA	AA	AA	AA	TA	AA	TA	TA	AA	AA	AA	AA	TA	AA	TA	TA	TA	AA	TA	AA	TA	TA	TA	AA	AA	TA	TA	AA	TA	AA	TA	AA	AA	TA	TA	AA	AA	AA	TA
contig18384_137	C	A	CC	AC	CC	AC	AC	CC	AC	AC	AC	CC	CC	CC	AC	CC	AC	AC	CC	CC	CC	CC	AC	CC	AC	AC	AC	CC	AA	CC	AC	AC	AC	CC	CC	AC	AC	CC	AC	CC	AC	CC	CC	AC	AC	CC	CC	CC	AC
contig7385_111	A	G	AA	GA	AA	GA	GA	AA	GA	GA	GA	AA	AA	AA	GA	AA	GA	GA	AA	AA	AA	AA	GA	AA	GA	GA	GA	AA	GA	AA	GA	GA	GA	AA	AA	GA	GA	AA	GA	AA	GA	AA	AA	GA	GA	AA	AA	AA	GA
contig238402_182	G	A	GG	AG	GG	AG	AG	GG	AG	AG	AG	GG	GG	GG	AG	GG	AG	AG	GG	GG	GG	GG	AG	GG	AG	AG	AG	GG	AG	GG	AG	AG	AG	GG	GG	AG	AG	GG	AG	GG	AG	GG	GG	AG	AG	GG	AG	GG	AG
contig53127_207	C	T	CC	TC	CC	TC	TC	CC	TC	TC	TC	CC	CC	CC	TC	CC	TC	TC	CC	CC	CC	CC	TC	CC	TC	TC	TC	CC	TC	CC	TC	TC	TC	CC	CC	TC	TC	CC	TC	CC	TC	CC	CC	TC	TC	CC	TC	CC	TC
contig2736_88	C	T	CC	CC	CC	CC	TC	CC	CC	CC	CC	TC	CC	TC	TC	CC	CC	TC	CC	CC	TC	CC	TC	TC	TC	CC	CC	CC	TC	CC	TC	TC	TC	CC	TC	TC	TC	TC	CC	TC	CC	TC	CC	TC	CC	CC	CC	TC	TC
contig32240_74	C	T	CC	TC	CC	TC	TT	CC	TC	TC	TC	TC	CC	TC	TT	CC	TC	TT	CC	CC	TC	CC	TT	TC	TT	TC	TC	CC	TT	CC	TT	TT	TT	CC	TC	TT	TT	TC	TC	TC	TC	TC	CC	TT	TC	CC	TC	TC	TT
contig6827_174	G	A	GG	AG	GG	AG	AA	GG	AG	AG	AG	AG	GG	AG	AA	GG	AG	AA	GG	GG	AG	GG	AA	AG	AA	AG	AG	GG	AA	GG	AA	AA	AA	GG	AG	AA	AA	AG	AG	AG	AG	AG	GG	AA	AG	AG	AG	AG	AA
contig2346_51	C	T	TC	TC	TC	TC	CC	TC	TC	TC	TC	CC	TC	CC	CC	TC	TC	CC	TC	TC	CC	TC	CC	CC	CC	TC	TC	TC	CC	TC	CC	CC	CC	TC	CC	CC	CC	CC	TC	CC	TC	CC	TC	CC	TC	TC	TC	CC	CC
contig32240_102	A	G	AA	GA	AA	GA	GG	AA	GA	GA	GA	GA	AA	GA	GG	AA	GA	GG	AA	AA	GA	AA	GG	GA	GG	GA	GA	AA	GG	AA	GG	GG	GG	AA	GA	GG	GG	GA	GA	GA	GA	GA	AA	GG	GA	GA	GA	GA	GG
contig32240_101	C	T	CC	TC	CC	TC	TT	CC	TC	TC	TC	TC	CC	TC	TT	CC	TC	TT	CC	CC	TC	CC	TT	TC	TT	TC	TC	CC	TT	CC	TT	TT	TT	CC	TC	TT	TT	TC	TC	TC	TC	TC	CC	TT	TC	TC	TC	TC	TT
contig621595_95	C	T	TC	TC	CC	TC	CC	TC	TC	TC	TC	CC	TC	CC	CC	TC	TC	CC	TC	TC	CC	TC	CC	CC	CC	TC	TC	TC	CC	TC	CC	CC	CC	TC	CC	CC	CC	CC	TC	CC	TC	CC	TC	CC	TC	TC	TC	CC	CC
contig28416_57	C	T	CC	CC	CC	CC	TC	CC	CC	CC	CC	TC	CC	TC	TC	CC	CC	TC	CC	CC	TC	CC	TC	TC	TC	CC	CC	CC	TC	CC	TC	TC	TC	CC	TC	TC	TC	TC	CC	TC	CC	TC	CC	TC	CC	CC	CC	TC	TC
contig38261_253	G	A	AG	AG	AG	AG	GG	AG	AG	AG	AG	GG	AG	GG	GG	AG	AG	GG	AG	AG	GG	AG	GG	GG	GG	AG	AG	AG	GG	AG	GG	GG	GG	AG	GG	GG	GG	GG	AG	GG	AG	GG	AG	GG	AG	AG	AG	GG	GG
contig6827_166	G	A	GG	AG	GG	AG	AA	GG	AG	AG	AG	AG	GG	AG	AA	GG	AG	AA	GG	GG	AG	GG	AA	AA	AA	AG	AG	GG	AA	GG	AA	AA	AA	GG	AG	AA	AA	AG	AG	AG	AG	AG	GG	AA	AG	AG	AG	AG	AA
contig2736_30	G	A	AG	AA	AG	AA	AG	AG	AA	AA	AA	GG	AG	GG	AG	AG	AA	AG	AG	AG	GG	AG	AG	GG	AG	AA	AA	AG	AG	AG	AG	AG	AG	AG	GG	AG	AG	GG	AA	GG	AA	GG	AG	AG	AA	AA	AA	GG	AG
contig32240_93	A	T	AA	AA	AA	AA	TA	AA	AA	AA	AA	TA	AA	TA	TA	AA	AA	TA	AA	AA	TA	AA	TA	TA	TA	AA	AA	AA	TA	AA	TA	TA	TA	AA	TA	TA	TA	TA	AA	TA	AA	TA	AA	TA	AA	AA	AA	TA	TA
contig53127_179	A	C	CA	CA	CA	CA	AA	CA	CA	CA	CA	AA	CA	AA	AA	CA	CA	AA	CA	CA	AA	CA	AA	AA	AA	CA	CA	CA	AA	CA	AA	AA	AA	CA	AA	AA	AA	AA	CA	AA	CA	AA	CA	AA	CA	CA	CA	AA	AA
contig32240_204	G	A	AG	AG	AG	AG	GG	AG	AG	AG	AG	GG	AG	GG	GG	AG	AG	GG	AG	AG	GG	AG	GG	GG	GG	AG	AG	AG	GG	AG	GG	GG	GG	AG	GG	GG	GG	GG	AG	GG	AG	GG	AG	GG	AG	AG	AG	GG	GG
contig28416_93	G	A	GG	GG	GG	GG	AG	GG	GG	GG	GG	AG	GG	AG	AG	GG	GG	AG	GG	GG	AG	GG	AG	AG	AG	GG	GG	GG	AG	GG	AG	AG	AG	GG	AG	AG	AG	AG	GG	AG	GG	AG	GG	AG	GG	GG	GG	AG	AG
contig31823_15	G	A	AG	AG	AG	AG	GG	AG	AG	AG	AG	GG	AG	GG	GG	AG	AG	GG	AG	AG	GG	AG	GG	GG	GG	AG	AG	AG	GG	AG	GG	GG	GG	AG	GG	GG	GG	GG	AG	GG	AG	GG	AG	GG	AG	AG	AG	GG	GG
contig469_27	A	G	GA	GG	GA	GG	GA	GA	GG	GG	GG	AA	GA	AA	GA	GA	GG	GA	GA	GA	AA	GA	GA	AA	GA	GG	GG	GA	GA	GA	GA	GA	GA	GA	AA	GA	GA	AA	GG	AA	GG	AA	GA	GA	GA	GA	GA	AA	GA
contig2736_70	T	C	CT	CC	CT	CC	CT	CT	CC	CC	CC	TT	CT	TT	CT	CT	CC	CT	CT	CT	TT	CT	CT	TT	CT	CC	CC	CT	CT	CT	CT	CT	CT	CT	TT	CT	CT	TT	CC	TT	CC	TT	CT	CT	CC	CC	CC	TT	CT
contig714057_87	C	T	TC	TC	TC	TC	CC	TC	TC	TC	TC	CC	TC	CC	CC	TC	TC	CC	TC	TC	CC	TC	CC	CC	CC	TC	TC	TC	CC	TC	CC	CC	CC	TC	CC	CC	CC	CC	TC	CC	CC	CC	TC	CC	TC	TC	TC	CC	CC
contig149020_17	T	A	TT	TT	TT	TT	AT	TT	TT	TT	TT	AT	TT	AT	AT	TT	TT	AT	TT	TT	AT	TT	AT	AT	AT	TT	TT	TT	AT	TT	AT	AT	AT	TT	AT	AT	AT	AT	TT	AT	AT	AT	TT	AT	TT	TT	TT	AT	AT
contig607724_21	T	G	GT	TT	GT	TT	GT	GT	TT	TT	TT	GG	GT	GG	GT	GT	TT	GT	GT	GT	GG	GT	GT	GG	GT	TT	TT	GT	GT	GT	GT	GT	GT	GT	GG	GT	GT	GG	TT	GG	GT	GG	GT	GT	TT	TT	TT	GG	GT
contig595069_10	C	T	TC	TC	TC	TC	CC	TC	TC	TC	TC	CC	TC	CC	CC	TC	TC	CC	TC	TC	CC	TC	CC	CC	CC	TC	TC	TC	CC	TC	CC	CC	CC	TC	CC	CC	CC	CC	TC	CC	CC	CC	TC	CC	TC	TC	TC	CC	CC
contig714057_88	T	C	CT	CT	CT	CT	TT	CT	CT	CT	CT	TT	CT	TT	TT	CT	CT	TT	CT	CT	TT	CT	TT	TT	TT	CT	CT	CT	TT	CT	TT	TT	TT	CT	TT	TT	TT	TT	CT	TT	TT	TT	CT	TT	CT	CT	CT	TT	TT
contig436983_51	C	T	CC	CC	CC	CC	TC	CC	CC	CC	CC	TC	CC	TC	TC	CC	CC	TC	CC	CC	TC	CC	TC	TC	TC	CC	CC	CC	TC	CC	TC	TC	TC	CC	TC	TC	TC	TC	CC	TC	TC	TC	CC	TC	TC	TC	CC	TC	TC
contig607724_43	G	A	AG	AG	AG	AG	GG	AG	AG	AG	AG	GG	AG	GG	GG	AG	AG	GG	AG	AG	GG	AG	GG	GG	GG	AG	AG	AG	GG	AG	GG	GG	GG	AG	GG	GG	GG	GG	AG	GG	GG	GG	AG	GG	AG	AG	AG	GG	GG
contig81574_45	G	A	GG	GG	GG	GG	AG	GG	GG	GG	GG	AG	GG	AG	AG	GG	GG	AG	GG	GG	AG	GG	AG	AG	AG	GG	GG	GG	AG	GG	AG	AG	AG	GG	AG	AG	AG	AG	GG	AG	AG	AG	GG	AG	GG	AG	GG	AG	AG
contig607724_135	C	T	TC	TC	TC	TC	CC	TC	TC	TC	TC	CC	TC	CC	CC	TC	TC	CC	TC	TC	CC	TC	CC	CC	CC	TC	TC	TC	CC	TC	CC	CC	CC	TC	CC	CC	CC	CC	TC	CC	CC	CC	TC	CC	TC	TC	TC	CC	CC
contig714057_23	G	A	AG	AG	AG	AG	GG	AG	AG	AG	AG	AG	AG	GG	GG	AG	AG	GG	AG	AG	GG	AG	GG	GG	GG	AG	AG	AG	GG	AG	GG	GG	GG	AG	GG	GG	GG	GG	AG	GG	GG	GG	AG	GG	AG	AG	AG	GG	GG
contig607724_8	G	A	GG	GG	GG	GG	AG	GG	GG	GG	GG	AG	GG	AG	AG	GG	GG	AG	GG	GG	AG	GG	AG	AG	AG	GG	GG	GG	AG	GG	AG	AG	AG	GG	AG	AG	AG	AG	GG	AG	AG	AG	GG	AG	AG	AG	GG	AG	AG
contig515036_129	C	T	TC	TC	TC	TC	CC	TC	TC	TC	TC	CC	TC	CC	CC	TC	TC	CC	TC	TC	CC	TC	CC	CC	CC	TT	TC	TC	CC	TC	CC	CC	CC	TC	CC	CC	CC	CC	TC	CC	CC	CC	TC	CC	TC	TC	TC	CC	CC
contig427667_110	G	A	GG	AG	GG	AG	AG	GG	AG	AG	AG	GG	GG	GG	AG	GG	AG	AG	GG	GG	GG	GG	AG	GG	AG	AG	AG	GG	AG	GG	AG	AG	AG	GG	GG	AG	AG	GG	AG	GG	AG	GG	GG	AG	AG	GG	AG	GG	AG
contig28115_101	G	T	GG	GG	GG	GG	TG	GG	GG	GG	GG	TG	GG	TG	TG	GG	GG	TG	GG	GG	TG	GG	TG	TG	TG	GG	GG	GG	TG	GG	TG	TG	TG	GG	TG	TG	TG	TG	GG	TG	TG	TG	GG	TG	GG	TG	GG	TG	TG
contig9560_67	G	A	GG	GG	GG	GG	AG	GG	GG	GG	GG	AG	GG	AG	AG	GG	GG	AG	GG	GG	AG	GG	AG	AG	AG	GG	GG	GG	AG	GG	AG	AG	AG	GG	AG	AG	AG	AG	GG	AG	AG	AG	GG	AG	AG	AG	GG	AG	AG
contig550508_87	T	C	CT	CT	CT	CT	TT	CT	CT	CT	CT	TT	CT	TT	TT	CT	CT	TT	CT	CT	TT	CT	TT	TT	TT	CT	CT	CT	TT	CT	TT	TT	TT	CT	TT	TT	TT	TT	CT	TT	TT	TT	CT	TT	TT	CT	CT	TT	TT
contig44313_88	C	T	TC	TC	TC	TC	CC	TC	TC	TC	TC	CC	TC	CC	CC	TC	TC	CC	TC	TC	CC	TC	CC	CC	CC	TC	TC	TC	CC	TC	CC	CC	CC	TC	CC	CC	CC	CC	TC	CC	CC	CC	TC	CC	CC	TC	TC	CC	CC
contig671208_92	A	G	GA	AA	GA	AA	AA	GA	AA	AA	GA	GA	GA	GA	AA	GA	AA	AA	GA	GA	GA	GA	AA	GA	AA	AA	AA	GA	AA	GA	AA	AA	AA	GA	GA	AA	AA	GA	AA	GA	AA	GA	GA	AA	GA	GA	GA	GA	AA
contig11954_73	C	T	TC	TC	TC	TC	CC	TC	TC	TC	TC	CC	TC	CC	CC	TC	TC	CC	TC	TC	CC	TC	CC	CC	CC	TC	TC	TC	CC	TC	CC	CC	CC	TC	CC	CC	CC	CC	TC	CC	CC	CC	TC	CC	CC	TC	TC	CC	CC
contig19532_101	C	T	TC	TC	TC	TC	CC	TC	TC	TC	TC	CC	TC	CC	CC	TC	TC	CC	TC	TC	CC	TC	CC	CC	CC	TC	TC	TC	CC	TC	CC	CC	CC	TC	CC	CC	CC	CC	TC	CC	CC	CC	TC	CC	CC	TC	TC	CC	CC
contig541048_9	G	A	AG	AG	AG	AG	GG	AG	AG	AG	AG	GG	AG	GG	GG	AG	AG	GG	AG	AG	GG	AG	GG	GG	GG	AG	AG	AG	GG	AG	GG	GG	GG	AG	GG	GG	GG	GG	AG	GG	GG	GG	AG	GG	AG	AG	AG	GG	GG
contig569779_121	C	A	AC	AC	AC	AC	CC	AC	AC	CC	AC	CC	AC	CC	CC	AC	AC	CC	AC	AC	CC	AC	CC	CC	CC	AC	AC	AC	CC	AC	CC	CC	CC	AC	CC	CC	CC	CC	AC	CC	CC	CC	AC	CC	AC	AC	AC	CC	CC
contig841128_58	T	C	CT	CT	CT	CT	TT	CT	CT	CT	CT	TT	CT	TT	TT	CT	CT	TT	CT	CT	TT	CT	TT	TT	TT	CT	CT	CT	TT	CT	TT	TT	TT	CT	TT	TT	TT	TT	CT	TT	TT	TT	CT	TT	CT	CT	CT	TT	TT
contig19532_74	G	A	GG	GG	GG	GG	AG	GG	GG	GG	GG	AG	GG	AG	AG	GG	GG	AG	GG	GG	AG	GG	AG	AG	AG	GG	GG	GG	AG	GG	AG	AG	AG	GG	AG	AG	AG	AG	GG	AG	AG	AG	GG	AG	GG	GG	GG	AG	AG
contig18310_39	A	T	TA	TA	TA	TA	AA	TA	TA	TA	TA	AA	TA	AA	AA	TA	TA	AA	TA	TA	AA	TA	AA	AA	AA	TA	TA	TA	AA	TA	AA	AA	AA	TA	AA	AA	AA	AA	TA	AA	AA	AA	TA	AA	TA	TA	TA	AA	AA
contig81574_115	C	T	CC	TC	CC	TC	TC	CC	TC	TC	CC	CC	CC	CC	TC	CC	TC	TC	CC	CC	CC	CC	TC	CC	TC	TC	TC	CC	TC	CC	TC	TC	TC	CC	CC	TC	TC	CC	TC	CC	TC	CC	CC	TC	CC	CC	TC	CC	TC
contig569779_24	A	G	GA	GA	GA	GA	AA	GA	GA	AA	GA	AA	GA	AA	AA	GA	GA	AA	GA	GA	AA	GA	AA	AA	AA	GA	GA	GA	AA	GA	AA	AA	AA	GA	AA	AA	AA	AA	GA	AA	AA	AA	GA	AA	GA	GA	GA	AA	AA
contig34359_188	G	A	AG	AG	AG	AG	GG	AG	AG	AG	AG	GG	AG	GG	GG	AG	AG	GG	AG	AG	GG	AG	GG	GG	GG	AG	AG	AG	GG	AG	GG	GG	GG	AG	GG	GG	GG	GG	AG	GG	GG	GG	AG	GG	AG	AG	AG	GG	GG
contig595069_85	A	T	TA	AA	TA	AA	AA	TA	AA	AA	TA	TA	TA	TA	AA	TA	AA	AA	TA	TA	TA	TA	AA	TA	AA	AA	AA	TA	AA	TA	AA	AA	AA	TA	TA	AA	AA	TA	AA	TA	AA	TA	TA	AA	AA	TA	AA	TA	AA
contig515036_60	G	C	CG	CG	CG	CG	GG	CG	CG	CG	CG	GG	CG	GG	CC	CG	CG	GG	CG	CG	GG	CG	GG	GG	GG	CC	CG	CG	GG	CG	GG	GG	GG	CG	GG	GG	GG	GG	CG	GG	GG	GG	CG	GG	CG	CG	CG	GG	GG
contig33231_158	A	G	GA	AA	GA	AA	AA	GA	AA	AA	GA	GA	GA	GA	AA	GA	AA	AA	GA	GA	GA	GA	AA	GA	AA	AA	AA	GA	AA	GA	AA	AA	AA	GA	GA	AA	AA	GA	AA	GA	AA	GA	GA	AA	AA	GA	AA	GA	AA
contig595069_102	A	G	GA	AA	GA	AA	AA	GA	AA	AA	GA	GA	GA	GA	AA	GA	AA	AA	GA	GA	GA	GA	AA	GA	AA	AA	AA	GA	AA	GA	AA	AA	AA	GA	GA	AA	AA	GA	AA	GA	AA	GA	GA	AA	AA	GA	AA	GA	AA
contig727359_90	C	T	CC	TC	CC	TC	TC	CC	TC	TC	CC	CC	CC	CC	TC	CC	TC	TC	CC	CC	CC	CC	TC	CC	CC	TC	TC	CC	TC	CC	TC	TC	TC	CC	CC	TC	TC	CC	TC	CC	TC	CC	CC	TC	CC	CC	TC	CC	TC
contig16573_181	G	T	GG	TG	GG	TG	TG	GG	TG	TG	GG	GG	GG	GG	TG	GG	TG	TG	GG	GG	GG	GG	TG	GG	GG	TG	TG	GG	TG	GG	TG	TG	TG	GG	GG	TG	TG	GG	TG	GG	TG	GG	GG	TG	TG	GG	TG	GG	TG
contig12399_4	T	C	TT	CT	TT	CT	CT	TT	CT	CT	TT	TT	TT	TT	CT	TT	CT	CT	TT	TT	TT	TT	CT	TT	TT	CT	CT	TT	CT	TT	CT	CT	CT	TT	TT	CT	CT	TT	CT	TT	CT	TT	TT	CT	CT	TT	CT	TT	CT
contig978600_37	G	A	GG	AG	GG	AG	AG	GG	AG	AG	GG	GG	GG	GG	AG	GG	AG	AG	GG	GG	GG	GG	AG	GG	GG	AG	AG	GG	AG	GG	AG	AG	AG	GG	GG	AG	AG	GG	AG	GG	AG	GG	GG	AG	AG	GG	AG	GG	AG
contig28115_211	C	G	GG	GC	GG	GC	CC	GG	GC	GC	GG	GG	GG	GC	CC	GG	GC	CC	GG	GG	GC	GG	CC	GC	GC	GC	GC	GG	CC	GG	CC	CC	CC	GG	GC	CC	CC	GC	GC	GC	CC	GC	GG	CC	CC	GC	GC	GC	CC
contig19337_26	C	T	CC	TC	CC	TC	TC	CC	TC	TC	CC	CC	CC	CC	TC	CC	TC	TC	CC	CC	CC	CC	TC	CC	CC	TC	TC	CC	TC	CC	TC	TC	TC	CC	CC	TC	TC	CC	TC	CC	TC	CC	CC	TC	TC	CC	TC	CC	TC
contig34359_232	C	A	CC	AC	CC	AC	AC	CC	AC	AC	CC	CC	CC	CC	AC	CC	AC	AC	CC	CC	CC	CC	AC	CC	CC	AC	AC	CC	AC	CC	AC	AC	AC	CC	CC	AC	AC	CC	AC	CC	AC	CC	CC	AC	AC	CC	AC	CC	AC
contig16573_176	G	T	GG	TG	GG	TG	TG	GG	TG	TG	GG	GG	GG	GG	TG	GG	TG	TG	GG	GG	GG	GG	TG	GG	GG	TG	TG	GG	TG	GG	TG	TG	TG	GG	GG	TG	TG	GG	TG	GG	TG	GG	GG	TG	TG	GG	TG	GG	TG
contig16573_152	G	A	GG	AG	GG	AG	AG	GG	AG	AG	GG	GG	GG	GG	AG	GG	AG	AG	GG	GG	GG	GG	AG	GG	GG	AG	AG	GG	AG	GG	AG	AG	AG	GG	GG	AG	AG	GG	AG	GG	AG	GG	GG	AG	AG	GG	AG	GG	AG
contig569779_149	T	A	AT	TT	AT	TT	TT	AT	TT	TT	AT	AT	AT	AT	TT	AT	TT	TT	AT	AT	AT	AT	TT	AT	AT	TT	TT	AT	TT	AT	TT	TT	TT	AT	AT	TT	TT	AT	TT	AT	TT	AT	AT	TT	TT	AT	TT	AT	TT
contig19532_150	T	C	TT	CT	TT	CT	CT	TT	CT	CT	TT	TT	TT	TT	CT	TT	CT	CT	TT	TT	TT	TT	CT	TT	TT	CT	CT	TT	CT	TT	CT	CT	CT	TT	TT	CT	CT	TT	CT	TT	CT	TT	TT	CT	CT	TT	CT	TT	CT
contig541048_3	A	C	AA	CA	AA	CA	CA	AA	CA	CA	AA	AA	AA	AA	CA	AA	CA	CA	AA	AA	AA	AA	CA	AA	AA	CA	CA	AA	CA	AA	CA	CA	CA	AA	AA	CA	CA	AA	CA	AA	CA	AA	AA	CA	CA	AA	CA	AA	CA
contig20960_197	A	T	TA	AA	TA	AA	AA	TA	AA	AA	TA	TA	TA	TA	AA	TA	AA	AA	TA	TA	TA	TA	AA	TA	TA	AA	AA	TA	AA	TA	AA	AA	AA	TA	TA	AA	AA	TA	AA	TA	AA	TA	TA	AA	TA	TA	TA	TA	AA
contig570759_99	T	C	TT	CT	TT	CT	CT	TT	CT	CT	TT	TT	TT	TT	CT	TT	CT	CT	TT	TT	TT	TT	CT	TT	TT	CT	CT	TT	CT	TT	CT	CT	CT	TT	TT	CT	CT	TT	CT	TT	CT	TT	TT	CT	TT	TT	TT	TT	CT
contig541048_109	C	T	CC	TC	CC	TC	TC	CC	TC	TC	CC	CC	CC	CC	TC	CC	TC	TC	CC	CC	CC	CC	TC	CC	CC	TC	TC	CC	TC	CC	TC	TC	TC	CC	CC	TC	TC	CC	TC	CC	TC	CC	CC	TC	CC	CC	CC	CC	TC
contig20960_63	G	A	AG	GG	AG	GG	GG	AG	GG	GG	AG	AG	AG	AG	GG	AG	GG	GG	AG	AG	AG	AG	GG	AG	AG	GG	GG	AG	GG	AG	GG	GG	GG	AG	AG	GG	GG	AG	GG	AG	GG	AG	AG	GG	AG	AG	AG	AG	GG
contig44313_87	A	G	GG	GA	GG	GA	AA	GG	GA	GA	GG	GA	GG	GA	AA	GG	GA	AA	GG	GG	GA	GG	AA	GA	GA	GA	GA	GG	AA	GG	AA	AA	AA	GG	GA	AA	AA	GA	GA	GA	AA	GA	GG	AA	GG	GG	GG	GA	AA
contig44313_129	T	A	AA	AT	AA	AT	TT	AA	AT	AT	AA	AT	AA	AT	TT	AA	AT	TT	AA	AA	AT	AA	TT	AT	AT	AT	AT	AA	TT	AA	TT	TT	TT	AA	AT	TT	TT	AT	AT	AT	TT	AT	AA	TT	AA	AA	AA	AT	TT
contig570759_127	T	A	AA	AT	AA	AT	TT	AA	AT	AT	AA	AT	AA	AT	TT	AA	TT	TT	AA	AA	AT	AA	TT	AT	AT	TT	AT	AA	TT	AA	TT	TT	TT	AA	AT	TT	TT	AT	TT	AT	TT	AT	AA	TT	AA	AA	AA	AT	TT
contig44313_24	C	T	TC	CC	TC	CC	CC	TC	CC	CC	TC	TC	TC	TC	CC	TC	CC	CC	TC	TC	TC	TC	CC	TC	TC	CC	CC	TC	CC	TC	CC	CC	CC	TC	TC	CC	CC	TC	CC	TC	CC	TC	TC	CC	TC	TC	TC	TC	CC
contig11954_51	A	G	GA	AA	GA	AA	AA	GA	AA	AA	GA	GA	GA	GA	AA	GA	AA	AA	GA	GA	GA	GA	AA	GA	GA	AA	AA	GA	AA	GA	AA	AA	AA	GA	GA	AA	AA	GA	AA	GA	AA	GA	GA	AA	GA	GA	GA	GA	AA
contig570759_126	A	G	GA	AA	GA	AA	AA	GA	AA	AA	GA	GA	GA	GA	AA	GA	AA	AA	GA	GA	GA	GA	AA	GA	GA	AA	AA	GA	AA	GA	AA	AA	AA	GA	GA	AA	AA	GA	AA	GA	AA	GA	GA	AA	AA	GA	AA	GA	AA
contig550508_6	C	T	TC	TT	CC	TT	TC	CC	TT	TT	CC	CC	TC	CC	TC	TC	TT	TC	TC	TC	CC	TC	TC	CC	CC	TT	TT	TC	TC	TC	TT	TC	TC	TC	CC	TC	TC	CC	TT	CC	TC	CC	TC	TC	TT	TT	TT	CC	TC
contig11954_133	A	C	AA	CA	AA	CA	CA	AA	CA	CA	AA	AA	AA	AA	CA	AA	CA	CA	AA	AA	AA	AA	CA	AA	AA	CA	CA	AA	CA	AA	CA	CA	CA	AA	AA	CA	CA	AA	CA	AA	CA	AA	AA	CA	CA	AA	CA	AA	CA
contig8038_121	A	T	AA	AA	AA	AA	TA	AA	AA	AA	AA	TA	AA	TA	TA	AA	AA	TA	AA	AA	TA	AA	TA	TA	TA	AA	AA	AA	TA	AA	TA	TA	TA	AA	TA	TA	TA	TA	AA	TA	TA	TA	AA	TA	AA	TA	AA	TA	TA
contig434099_36	A	G	GA	AA	GA	AA	AA	GA	AA	AA	GA	GA	GA	GA	AA	GA	AA	AA	GA	GA	GA	GA	AA	GA	GA	AA	AA	GA	AA	GA	AA	AA	AA	GA	GA	AA	AA	GA	AA	GA	AA	GA	GA	AA	AA	AA	AA	GA	AA
contig434099_62	G	A	GG	AG	GG	AG	AG	GG	AG	AG	GG	GG	GG	GG	AG	GG	AG	AG	GG	GG	GG	GG	AG	GG	GG	AG	AG	GG	AG	GG	AG	AG	AG	GG	GG	AG	AG	GG	AG	GG	AG	GG	GG	AG	AG	GG	AG	GG	AG
contig17853_64	C	T	TC	TC	TC	TC	CC	TC	TC	TC	TC	CC	TC	CC	CC	TC	TC	CC	TC	TC	CC	TC	CC	CC	CC	TC	TC	TC	CC	TC	CC	CC	CC	TC	CC	CC	CC	CC	TC	CC	CC	CC	TC	CC	TC	TC	TC	CC	CC
contig50079_31	G	A	GG	AG	GG	AG	AG	GG	AG	AG	GG	GG	GG	GG	AG	GG	AG	AG	GG	GG	GG	GG	AG	GG	GG	AG	AG	GG	AG	GG	AG	AG	AG	GG	GG	AG	AG	GG	AG	GG	AG	GG	GG	GG	AG	GG	AG	GG	AG
contig28137_71	T	C	CT	CT	CT	CT	TT	CT	CT	CT	CT	TT	CT	TT	TT	CT	CT	TT	CT	CT	TT	CT	TT	TT	TT	CT	CT	CT	TT	CT	TT	TT	TT	CT	TT	TT	TT	TT	CT	TT	TT	TT	CT	TT	CT	CT	CT	TT	TT
contig28137_140	A	G	GA	GA	GA	GA	AA	GA	GA	GA	GA	AA	GA	AA	AA	GA	GA	AA	GA	GA	AA	GA	AA	AA	AA	GA	GA	GA	AA	GA	AA	AA	AA	GA	AA	AA	AA	AA	GA	AA	AA	AA	GA	AA	GA	GA	GA	AA	AA
contig17853_46	C	T	TC	TC	TC	TC	CC	TC	TC	TC	TC	CC	TC	CC	CC	TC	TC	CC	TC	TC	CC	TC	CC	CC	CC	TC	TC	TC	CC	TC	CC	CC	CC	TC	CC	CC	CC	CC	TC	CC	CC	CC	TC	CC	TC	TC	TC	CC	CC
contig651848_122	C	G	GG	GC	GG	GC	CC	GG	GC	GC	GG	GC	GG	GC	CC	GG	GC	CC	GG	GG	GC	GG	CC	GC	GC	GC	GC	GG	CC	GG	CC	CC	CC	GG	GC	CC	CC	GC	GC	GC	CC	GC	GG	GC	GG	GC	GC	GC	CC
contig651848_138	G	T	GG	GG	GG	GG	TG	GG	GG	GG	GG	TG	GG	TG	TG	GG	GG	TG	GG	GG	TG	GG	TG	TG	TG	GG	GG	GG	TG	GG	TG	TG	TG	GG	TG	TG	TG	TG	GG	TG	TG	TG	GG	TG	GG	TG	GG	TG	TG
contig28137_38	G	A	AA	AG	AA	AG	GG	AA	AG	AG	AA	AG	AA	AG	GG	AA	AG	GG	AA	AA	AG	AA	GG	AG	AG	AG	AG	AA	GG	AA	GG	GG	GG	AA	AG	GG	GG	AG	AG	AG	GG	AG	AA	AG	AA	AA	AA	AG	GG
contig22113_62	T	C	TT	CT	TT	CT	CT	TT	CT	CT	TT	TT	TT	TT	CT	TT	CT	CT	TT	TT	TT	TT	CT	TT	TT	CT	CT	TT	CT	TT	CT	CT	CT	TT	TT	CT	CT	TT	CT	TT	CT	TT	TT	TT	CT	TT	CT	TT	CT
contig49718_75	T	C	CT	TT	CT	TT	TT	CT	TT	TT	CT	CT	CT	CT	TT	CT	TT	TT	CT	CT	CT	CT	TT	CT	CT	TT	TT	CT	TT	CT	TT	TT	TT	CT	CT	TT	TT	CT	TT	CT	TT	CT	CT	CT	CT	CT	CT	CT	TT
contig49718_5	T	C	CT	TT	CT	TT	TT	CT	TT	TT	CT	CT	CT	CT	TT	CT	TT	TT	CT	CT	CT	CT	TT	CT	CT	TT	TT	CT	TT	CT	TT	TT	TT	CT	CT	TT	TT	CT	TT	CT	TT	CT	CT	CT	CT	CT	CT	CT	TT
contig453451_28	C	T	CC	TC	CC	TC	TC	CC	TC	TC	CC	CC	CC	CC	TC	CC	TC	TC	CC	CC	CC	CC	TC	CC	CC	TC	TC	CC	TC	CC	TC	TC	TC	CC	CC	TC	TC	CC	TC	CC	TC	CC	CC	CC	TC	CC	CC	CC	TC
contig30844_202	C	A	AC	AC	AC	AC	CC	AC	AC	AC	AC	CC	AC	CC	CC	AC	AC	CC	AC	AC	CC	AC	CC	CC	CC	AC	AC	AC	CC	AC	CC	CC	CC	AC	CC	CC	CC	CC	AC	CC	CC	CC	AC	CC	AC	AC	AC	CC	CC
contig25429_19	A	G	GA	AA	GA	AA	AA	GA	AA	AA	GA	GA	GA	GA	AA	GA	AA	AA	GA	GA	GA	GA	AA	GA	GA	AA	AA	GA	AA	GA	AA	AA	AA	GA	GA	AA	AA	GA	AA	GA	AA	GA	GA	GA	GA	GA	GA	GA	AA
contig25429_105	T	C	CT	TT	CT	TT	TT	CT	TT	TT	CT	CT	CT	CT	TT	CT	TT	TT	CT	CT	CT	CT	TT	CT	CT	TT	TT	CT	TT	CT	TT	TT	TT	CT	CT	TT	TT	CT	TT	CT	TT	CT	CT	CT	CT	CT	CT	CT	TT
contig653177_86	T	C	CT	TT	CT	TT	TT	CT	TT	TT	CT	CT	CT	CT	TT	CT	TT	TT	CT	TT	CT	CT	TT	CT	CT	TT	TT	CT	TT	TT	TT	TT	TT	CT	CT	TT	TT	CT	TT	CT	TT	CT	CT	CT	CT	CT	CT	CT	TT
contig25429_244	C	A	AC	CC	AC	CC	CC	AC	CC	CC	AC	AC	AC	AC	CC	AC	CC	CC	AC	AC	AC	AC	CC	AC	AC	CC	CC	AC	CC	AC	CC	CC	CC	AC	AC	CC	CC	AC	CC	AC	CC	AC	AC	AC	CC	AC	AC	AC	CC
contig653177_41	A	T	TA	AA	TA	AA	AA	TA	AA	AA	TA	TA	TA	TA	AA	TA	AA	AA	TA	AA	TA	TA	AA	TA	TA	AA	AA	TA	AA	AA	AA	AA	AA	TA	TA	AA	AA	TA	AA	TA	AA	TA	TA	TA	TA	TA	TA	TA	AA
contig581208_156	T	G	GT	TT	GT	TT	TT	GT	TT	TT	GT	GT	GT	GT	TT	GT	TT	TT	GT	GT	GT	GT	TT	GT	GT	TT	TT	GT	TT	GT	TT	TT	TT	GT	GT	TT	TT	GT	TT	GT	TT	GT	GT	GT	TT	GT	GT	GT	TT
contig25429_253	C	G	GC	GG	GC	GG	GC	GC	GG	GG	GC	CC	GC	CC	GC	GC	GG	GC	GC	GC	CC	GC	GC	CC	CC	GG	GG	GC	GC	GC	GC	GC	GC	GC	CC	GC	GC	CC	GG	CC	GC	CC	GC	CC	CC	CC	GC	CC	GC
contig3783_140	A	T	AA	TA	AA	AA	TA	AA	AA	AA	AA	TA	AA	TA	TA	AA	AA	TA	AA	AA	TA	AA	TA	TA	TA	AA	AA	AA	TA	AA	TA	TA	TA	AA	TA	TA	TA	TA	AA	TA	TA	TA	AA	TA	AA	AA	AA	TA	TA
contig581208_121	A	T	TA	AA	TA	AA	AA	TA	AA	AA	TA	TA	TA	TA	AA	TA	AA	AA	TA	TA	TA	TA	AA	TA	TA	AA	AA	TA	AA	TA	AA	AA	AA	TA	TA	AA	AA	TA	AA	TA	AA	TA	TA	TA	AA	TA	TA	TA	AA
contig3783_139	T	A	TT	AT	TT	TT	AT	TT	TT	TT	TT	AT	TT	AT	AT	TT	TT	AT	TT	TT	AT	TT	AT	AT	AT	TT	TT	TT	AT	TT	AT	AT	AT	TT	AT	AT	AT	AT	TT	AT	AT	AT	TT	AT	TT	TT	TT	AT	AT
contig3783_115	T	C	CT	TT	CT	TT	TT	CT	TT	TT	CT	CT	CT	CT	TT	CT	TT	TT	CT	CT	CT	CT	TT	CT	CT	TT	TT	CT	TT	CT	TT	TT	TT	CT	CT	TT	TT	CT	TT	CT	TT	CT	CT	CT	TT	CT	CT	CT	TT
contig3783_106	G	C	CG	CG	CG	CC	CG	CG	CC	CC	CG	GG	CG	GG	CG	CG	CC	CG	CG	CG	GG	CG	CG	GG	GG	CC	CC	CG	CG	CG	CG	CG	CG	CG	GG	CG	CG	GG	CC	GG	CG	GG	CG	GG	GG	GG	CG	GG	CG
contig18150_158	T	C	TT	CT	TT	CT	CT	TT	CT	CT	TT	TT	TT	TT	CT	TT	CT	CT	TT	TT	TT	TT	CT	TT	TT	CT	CT	TT	CT	TT	CT	CT	CT	TT	TT	CT	CT	TT	CT	TT	CT	TT	TT	TT	TT	TT	TT	TT	CT
contig10219_236	G	A	AG	GG	AG	AG	GG	AG	AG	AG	AG	GG	AG	GG	GG	AG	AG	AG	AG	AG	GG	AG	GG	GG	GG	AG	AG	AG	GG	AG	GG	GG	GG	AG	GG	GG	GG	GG	AG	GG	GG	GG	AG	GG	AG	AG	AG	GG	GG
contig618362_106	T	G	TT	GT	TT	TT	GT	TT	TT	TT	TT	GT	TT	GT	GT	TT	TT	TT	TT	TT	GT	TT	GT	GT	GT	TT	TT	TT	GT	TT	GT	GT	GT	TT	GT	GT	GT	GT	TT	GT	GT	GT	TT	GT	TT	TT	TT	GT	GT
contig33035_178	C	T	TC	CC	TC	TC	CC	TC	TC	TC	TC	CC	TC	CC	CC	TC	TC	TC	TC	TC	CC	TC	CC	CC	CC	TC	TC	TC	CC	TC	CC	CC	CC	TC	CC	CC	CC	CC	TC	CC	CC	CC	TC	CC	TC	TC	TC	CC	CC
contig835523_65	G	A	GG	AG	GG	GG	AG	GG	GG	GG	GG	AG	GG	AG	AG	GG	GG	GG	GG	GG	AG	GG	AG	AG	AG	GG	GG	GG	AG	GG	AG	AG	AG	GG	AG	AG	AG	AG	GG	AG	AG	AG	GG	AG	GG	AG	GG	AG	AG
contig534621_6	A	G	GA	AA	GA	GA	AA	GA	GA	GA	GA	AA	GA	AA	AA	GA	GA	GA	GA	GA	AA	GA	AA	AA	AA	GA	GA	GA	AA	GA	AA	AA	AA	GA	AA	AA	AA	AA	GA	AA	AA	AA	GA	AA	GA	GA	GA	AA	AA
contig10219_145	A	T	AA	TA	AA	TA	TA	AA	TA	TA	AA	AA	AA	AA	TA	AA	TA	TA	AA	AA	AA	AA	TA	AA	AA	TA	TA	AA	TA	AA	TA	TA	TA	AA	AA	TA	TA	AA	TA	AA	TA	AA	AA	AA	TA	AA	TA	AA	TA
contig18150_150	T	A	AT	AT	AT	AA	AT	AT	AA	AA	AT	TT	AT	TT	AT	AT	AA	AA	AT	AT	TT	AT	AT	TT	TT	AA	AA	AT	AT	AT	AT	AT	AT	AT	TT	AT	AT	TT	AA	TT	AT	TT	AT	TT	AT	AT	AA	TT	AT
contig819049_3	C	G	CC	GC	GC	GG	GC	GC	GG	GG	GC	CC	GC	CC	GC	GC	GG	GG	GG	GC	CC	GC	GC	CC	CC	GG	GG	GC	GC	GC	GC	GC	GC	GC	CC	GC	GC	CC	GG	CC	GC	CC	GC	CC	GC	GC	GC	CC	GC
contig33035_202	C	T	TC	CC	TC	CC	CC	TC	CC	CC	TC	TC	TC	TC	CC	TC	CC	CC	TC	TC	TC	TC	CC	TC	TC	CC	CC	TC	CC	TC	CC	CC	CC	TC	TC	CC	CC	TC	CC	TC	CC	TC	TC	TC	CC	TC	CC	TC	CC
contig9856_148	G	A	GG	GG	AG	AG	GG	AG	AG	AG	AG	GG	AG	GG	GG	AG	AG	AG	AG	AG	GG	AG	GG	GG	GG	AG	AG	GG	GG	AG	GG	AG	GG	AG	GG	GG	GG	GG	AG	GG	GG	GG	AG	GG	GG	AG	AG	GG	GG
contig33035_201	C	T	TC	CC	TC	CC	CC	TC	CC	CC	TC	TC	TC	TC	CC	TC	CC	CC	TC	TC	TC	TC	CC	TC	TC	CC	CC	TC	CC	TC	CC	CC	CC	TC	TC	CC	CC	TC	CC	TC	CC	TC	TC	TC	CC	TC	CC	TC	CC
contig81441_63	T	C	TT	TT	CT	CT	TT	CT	CT	CT	CT	TT	CT	TT	TT	CT	CT	CT	CT	CT	TT	CT	TT	TT	TT	CT	CT	TT	TT	CT	TT	CT	TT	CT	TT	TT	TT	TT	CT	TT	TT	TT	CT	TT	TT	CT	CT	TT	TT
contig33035_206	C	T	TC	CC	TC	CC	CC	TC	CC	CC	TC	TC	TC	TC	CC	TC	CC	CC	TC	TC	TC	TC	CC	TC	TC	CC	CC	TC	CC	TC	CC	CC	CC	TC	TC	CC	CC	TC	CC	TC	CC	TC	TC	TC	CC	TC	CC	TC	CC
contig33035_200	T	C	CT	TT	CT	TT	TT	CT	TT	TT	CT	CT	CT	CT	TT	CT	TT	TT	CT	CT	CT	CT	TT	CT	CT	TT	TT	CT	TT	CT	TT	TT	TT	CT	CT	TT	TT	CT	TT	CT	TT	CT	CT	CT	TT	CT	TT	CT	TT
contig493463_71	A	G	GA	GA	AA	AA	GA	AA	AA	AA	AA	GA	AA	GA	GA	AA	AA	AA	AA	AA	GA	AA	GA	GA	GA	AA	AA	GA	GA	AA	GA	AA	GA	AA	GA	GA	GA	GA	AA	GA	GA	GA	AA	GA	GA	GA	AA	GA	GA
contig33035_207	T	C	CT	TT	CT	TT	TT	CT	TT	TT	CT	CT	CT	CT	TT	CT	TT	TT	CT	CT	CT	CT	TT	CT	CT	TT	TT	CT	TT	CT	TT	TT	TT	CT	CT	TT	TT	CT	TT	CT	TT	CT	CT	CT	TT	CT	TT	CT	TT
contig526481_27	G	A	GG	AG	GG	AG	AG	GG	AG	AG	GG	GG	GG	GG	AG	GG	AG	AG	GG	GG	GG	GG	AG	GG	GG	AG	AG	GG	AG	GG	AG	AG	AG	GG	GG	AG	AG	GG	AG	GG	AG	GG	GG	GG	AG	GG	AG	GG	AG
contig835523_24	A	C	AA	CA	AA	CA	CA	AA	CA	CA	AA	AA	AA	AA	CA	AA	CA	CA	AA	AA	AA	AA	CA	AA	AA	CA	CA	AA	CA	AA	CA	CA	CA	AA	AA	CA	CA	AA	CA	AA	CA	AA	AA	AA	CA	AA	CA	AA	CA
contig8420_5	C	G	GC	GC	CC	CC	GC	CC	CC	CC	CC	GC	CC	GC	GC	CC	CC	CC	CC	CC	GC	CC	GC	GC	GC	CC	CC	GC	GC	CC	GC	CC	GC	CC	GC	GC	GC	GC	CC	GC	GC	GC	CC	GC	GC	GC	CC	GC	GC
contig33035_171	T	G	TT	GT	TT	GT	GT	TT	GT	GT	TT	TT	TT	TT	GT	TT	GT	GT	TT	TT	TT	TT	GT	TT	TT	GT	GT	TT	GT	TT	GT	GT	GT	TT	TT	GT	GT	TT	GT	TT	GT	TT	TT	TT	GT	TT	GT	TT	GT
contig618362_80	T	A	AT	TT	AT	TT	TT	AT	TT	TT	AT	AT	AT	AT	TT	AT	TT	TT	AT	AT	AT	AT	TT	AT	AT	TT	TT	AT	AT	AT	TT	TT	TT	AT	AT	TT	TT	AT	TT	AT	TT	AT	AT	AT	TT	AT	AT	AT	TT
contig579223_59	T	G	TT	GT	TT	GT	GT	TT	GT	GT	TT	TT	TT	TT	GT	TT	GT	GT	TT	TT	TT	TT	GT	TT	TT	GT	GT	TT	TT	TT	GT	GT	GT	TT	TT	GT	GT	TT	GT	TT	GT	TT	TT	TT	GT	TT	GT	TT	GT
contig18989_63	A	G	AA	GA	AA	GA	GA	AA	GA	GA	AA	AA	AA	AA	GA	AA	GA	GA	AA	AA	AA	AA	GA	AA	AA	GA	GA	AA	AA	AA	GA	GA	GA	AA	AA	GA	GA	AA	GA	AA	GA	AA	AA	AA	GA	AA	GA	AA	GA
contig493463_101	C	T	TC	CC	TT	TC	CC	TT	CC	TC	TT	TC	TT	TC	CC	TT	TC	CC	TT	TT	TC	TT	CC	TC	TC	TC	TC	TC	CC	TT	CC	CC	CC	TT	TC	CC	CC	TC	TC	TC	CC	TC	TT	TC	CC	TC	TC	TC	CC
contig836231_60	A	T	TA	AA	TA	AA	AA	TA	AA	AA	TA	TA	TA	TA	AA	TA	AA	AA	TA	TA	TA	TA	AA	TA	TA	AA	AA	TA	TA	TA	AA	AA	AA	TA	TA	AA	AA	TA	AA	TA	AA	TA	TA	TA	TA	TA	TA	TA	AA
contig32481_27	C	T	CC	CC	TC	TC	CC	TC	TC	TC	TC	CC	TC	CC	CC	TC	TC	TC	CC	TC	CC	CC	CC	CC	CC	TC	TC	CC	CC	TC	CC	TC	CC	TC	CC	CC	CC	CC	TC	CC	CC	CC	TC	CC	CC	TC	TC	CC	CC
contig55125_43	C	T	CC	CC	TC	TC	CC	TC	TC	TC	TC	CC	TC	CC	CC	TC	TC	TC	TC	TC	CC	TC	CC	CC	CC	TC	TC	CC	CC	TC	CC	TC	CC	TC	CC	CC	CC	CC	TC	CC	CC	CC	TC	CC	CC	TC	TC	CC	CC
contig87581_152	G	A	GG	AG	GG	AG	AG	GG	AG	AG	GG	GG	GG	GG	AG	GG	AG	AG	GG	GG	GG	GG	AG	GG	GG	AG	AG	GG	GG	GG	AG	AG	AG	GG	GG	AG	AG	GG	AG	GG	AG	GG	GG	GG	AG	GG	AG	GG	AG
contig1769_23	G	A	GG	GG	AG	AG	GG	AG	AG	AG	AG	GG	AA	GG	GG	AG	AG	AG	AG	AG	GG	AG	GG	GG	GG	AG	AG	GG	GG	AA	GG	AG	GG	AG	GG	GG	GG	GG	AG	GG	GG	GG	AG	GG	GG	AA	AG	GG	GG
contig490759_40	G	C	CG	CG	GG	GG	CG	GG	GG	GG	GG	CG	GG	CG	CG	GG	GG	GG	GG	GG	CG	GG	CG	CG	CG	GG	GG	CG	CG	GG	CG	GG	CG	GG	CG	CG	CG	CG	GG	CG	CG	CG	GG	CG	CG	CG	GG	CG	CG
contig32481_50	C	T	CC	CC	TC	TC	CC	TC	TC	TC	TC	CC	TC	CC	CC	TC	TC	TC	CC	TC	CC	CC	CC	CC	CC	TC	TC	CC	CC	TC	CC	TC	CC	TC	CC	CC	CC	CC	TC	CC	CC	CC	TC	CC	CC	TC	TC	CC	CC
contig6095_15	G	T	TG	TG	GG	GG	TG	GG	GG	GG	GG	TG	GG	TG	TG	GG	GG	GG	GG	GG	TG	GG	TG	TG	TG	GG	GG	TG	TG	GG	TG	GG	TG	GG	TG	TG	TG	TG	GG	TG	TG	TG	GG	TG	TG	TG	GG	TG	TG
contig591655_16	C	T	TC	TC	CC	TC	TC	CC	CC	CC	CC	TC	CC	TC	TC	CC	CC	CC	CC	CC	TC	CC	TC	TC	TC	CC	CC	TC	TC	CC	TC	CC	TC	CC	TC	TC	TC	TC	CC	TC	TC	TC	CC	TC	TC	TC	CC	TC	TC
contig534862_42	C	T	CC	CC	TC	TC	CC	TC	TC	TC	TC	CC	TC	CC	CC	TC	TC	TC	TC	TC	CC	TC	CC	CC	CC	TC	TC	CC	CC	TC	CC	TC	CC	TC	CC	CC	CC	CC	TC	CC	CC	CC	TC	CC	CC	TC	TC	CC	CC
contig68599_130	T	C	CT	CT	TT	TT	CT	TT	TT	TT	TT	CT	TT	CT	CT	TT	TT	TT	TT	TT	CT	TT	CT	CT	CT	TT	TT	CT	CT	TT	CT	TT	CT	TT	CT	CT	CT	CT	TT	CT	CT	CT	TT	CT	CT	CT	TT	CT	CT
contig55125_13	C	T	CC	CC	TC	TC	CC	TC	TC	TC	TC	CC	TC	CC	CC	TC	TC	TC	TC	TC	CC	TC	CC	CC	CC	TC	TC	CC	CC	TC	CC	TC	CC	TC	CC	CC	CC	CC	TC	CC	CC	CC	TC	CC	CC	TC	TC	CC	CC
contig483849_108	G	A	GG	GG	AG	AG	GG	AG	AG	AG	AG	GG	AG	GG	GG	AG	AG	AG	AG	AG	GG	AG	GG	GG	GG	AG	AG	GG	GG	AG	GG	AG	GG	AG	GG	GG	GG	GG	AG	GG	GG	GG	AG	GG	GG	AG	AG	GG	GG
contig782526_184	G	A	AG	AG	GG	GG	AG	GG	GG	GG	GG	AG	GG	AG	AG	GG	GG	GG	GG	GG	AG	GG	AG	AG	AG	GG	GG	AG	AG	GG	AG	GG	AG	GG	AG	AG	AG	AG	GG	AG	AG	AG	GG	AG	AG	GG	GG	AG	AG
contig87581_172	G	T	GG	TG	GG	TG	TG	GG	TG	TG	GG	GG	GG	GG	TG	GG	TG	TG	GG	GG	GG	GG	TG	GG	GG	TG	TG	GG	GG	GG	TG	TG	TG	GG	GG	TG	TG	GG	TG	GG	TG	GG	GG	GG	TG	GG	TG	GG	TG
contig716552_115	A	C	CA	CA	AA	AA	CA	AA	AA	AA	AA	CA	AA	CA	CA	AA	AA	AA	AA	AA	CA	AA	CA	CA	CA	AA	AA	CA	CA	AA	CA	AA	CA	AA	CA	CA	CA	CA	AA	CA	CA	CA	AA	CA	CA	AA	AA	CA	CA
contig716552_68	C	T	TC	TC	CC	CC	TC	CC	CC	CC	CC	TC	CC	TC	TC	CC	CC	CC	CC	CC	TC	CC	TC	TC	TC	CC	CC	TC	TC	CC	TC	CC	TC	CC	TC	TC	TC	TC	CC	TC	TC	TC	CC	TC	TC	CC	CC	TC	TC
contig55125_61	G	C	GG	GG	CG	CG	GG	CG	CG	CG	CG	GG	CG	GG	GG	CG	CG	CG	CG	CG	GG	CG	GG	GG	GG	CG	CG	GG	GG	CG	GG	CG	GG	CG	GG	GG	GG	GG	CG	GG	GG	GG	CG	GG	GG	CG	CG	GG	GG
contig818809_178	G	A	GG	GG	AG	AG	GG	AG	AG	AG	AG	GG	AG	GG	GG	AG	AG	AG	AG	AG	GG	AG	GG	GG	GG	AG	AG	GG	GG	AG	GG	AG	GG	AG	GG	GG	GG	GG	AG	GG	GG	GG	AG	GG	GG	AG	AG	GG	GG
contig8420_8	C	T	TC	CC	TC	CC	CC	TC	CC	CC	TC	TC	TC	TC	CC	TC	CC	CC	TC	TC	TC	TC	CC	TC	TC	CC	CC	TC	TC	TC	CC	CC	CC	TC	TC	CC	CC	TC	CC	TC	CC	TC	TC	TC	CC	TC	TC	TC	CC
contig890164_170	C	T	CC	CC	TC	TC	CC	TC	TC	TC	TC	CC	TC	CC	CC	TC	TC	TC	TC	TC	CC	TC	CC	CC	CC	TC	TC	CC	CC	TC	CC	TC	CC	TC	CC	CC	CC	CC	TC	CC	CC	CC	TC	CC	CC	TC	TC	CC	CC
contig490759_203	G	A	GG	GG	AG	AG	GG	AG	AG	AG	AG	GG	AG	GG	GG	AG	AG	AG	AG	AG	GG	AG	GG	GG	GG	AG	AG	GG	GG	AG	GG	AG	GG	AG	GG	GG	GG	GG	AG	GG	GG	GG	AG	GG	GG	AG	AG	GG	GG
contig522648_113	G	A	GG	GG	AG	AG	GG	AG	AG	AG	AG	GG	AG	GG	GG	AG	AG	AG	AG	AG	GG	AG	GG	GG	GG	AG	AG	GG	GG	AG	GG	AG	GG	AG	GG	GG	GG	GG	AG	GG	GG	GG	AG	GG	GG	AG	AG	GG	GG
contig32481_263	A	G	GA	AA	GA	AA	AA	GA	AA	AA	GA	GA	GA	GA	AA	GA	AA	AA	GA	GA	GA	GA	AA	GA	GA	AA	AA	GA	GA	GA	AA	AA	AA	GA	GA	AA	AA	GA	AA	GA	AA	GA	GA	GA	GA	GA	GA	GA	AA
contig438752_22	G	A	GG	AG	GG	AG	AG	GG	AG	AG	GG	GG	GG	GG	AG	GG	AG	AG	GG	GG	GG	GG	AG	GG	GG	AG	AG	GG	GG	GG	AG	AG	AG	GG	GG	AG	AG	GG	AG	GG	AG	GG	GG	GG	AG	GG	AG	GG	AG
contig32481_264	G	A	AG	GG	AG	GG	GG	AG	GG	GG	AG	AG	AG	AG	GG	AG	GG	GG	AG	AG	AG	AG	GG	AG	AG	GG	GG	AG	AG	AG	GG	GG	GG	AG	AG	GG	GG	AG	GG	AG	GG	AG	AG	AG	AG	AG	AG	AG	GG
contig782526_168	G	T	GG	TG	TG	TT	TG	TG	TT	TT	TG	GG	TG	GG	TG	TG	TT	TT	TG	TG	GG	TG	TG	GG	GG	TT	TT	GG	GG	TG	TG	TT	TG	TG	GG	TG	TG	GG	TT	GG	TG	GG	TG	GG	GG	GG	TG	GG	TG
contig782526_122	C	T	CC	TC	TC	TT	TC	TC	TT	TT	TC	CC	TC	CC	TC	TC	TT	TT	TC	TC	CC	TC	TC	CC	CC	TT	TT	CC	CC	TC	TC	TT	TC	TC	CC	TC	TC	CC	TT	CC	TC	CC	TC	CC	CC	CC	TC	CC	TC
contig591807_100	C	T	CC	TC	CC	TC	TC	CC	TC	TC	CC	CC	CC	CC	TC	CC	TC	TC	CC	CC	CC	CC	TC	CC	CC	TC	TC	CC	CC	CC	TC	TC	TC	CC	CC	TC	TC	CC	TC	CC	TC	CC	CC	CC	TC	CC	CC	CC	TC
contig47875_85	T	G	GT	TT	GT	TT	TT	GT	TT	TT	GT	GT	GT	GT	TT	GT	TT	TT	GT	GT	GT	GT	TT	GT	GT	TT	TT	GT	GT	GT	TT	TT	TT	GT	GT	TT	TT	GT	TT	GT	TT	GT	GT	GT	GT	GT	GT	GT	TT
contig799906_160	A	T	TA	AA	TT	AA	AA	TT	AA	TA	TT	TA	TT	TA	AA	TT	TA	TA	TT	TT	TA	TT	AA	TA	TA	TA	TA	TA	TT	TT	AA	AA	AA	TT	TA	AA	AA	TT	TA	TA	AA	TA	TT	TA	TA	TT	TT	TA	AA
contig799906_74	G	A	AG	GG	AG	GG	GG	AG	GG	GG	AG	AG	AG	AG	GG	AG	GG	GG	AG	AG	AG	AG	GG	AG	AG	GG	GG	AG	AG	AG	GG	GG	GG	AG	AG	GG	GG	AG	GG	AG	GG	AG	AG	AG	AG	AG	AG	AG	GG
contig66929_9	A	C	CA	AA	CA	AA	AA	CA	AA	AA	CA	CA	CA	CA	AA	CA	AA	AA	CA	CA	CA	CA	AA	CA	CA	AA	AA	CA	CA	CA	AA	AA	AA	CA	CA	AA	AA	CA	AA	CA	AA	CA	CA	CA	CA	CA	CA	CA	AA
contig716552_18	C	T	TC	CC	TC	CC	CC	TC	CC	CC	TC	TC	TC	TC	CC	TC	CC	CC	TC	TC	TC	TC	CC	TC	TC	CC	CC	TC	TC	TC	CC	CC	CC	TC	TC	CC	CC	TC	CC	TC	CC	TC	TC	TC	TC	TC	TC	TC	CC
contig14487_201	G	T	TG	GG	TG	GG	GG	TG	GG	GG	TG	TG	TG	TG	GG	TG	GG	GG	TG	TG	TG	TG	GG	TG	TG	GG	GG	TG	TG	TG	GG	GG	GG	TG	TG	GG	GG	TG	GG	TG	GG	TG	TG	TG	TG	TG	TG	TG	GG
contig26038_91	T	A	AT	TT	AA	AT	TT	AA	AT	AT	AA	AT	AA	AT	TT	AA	AT	AT	AA	AA	AT	AA	TT	AT	AT	TT	AT	AT	AT	AA	TT	AT	TT	AA	AT	TT	TT	AT	AT	AT	TT	AT	AA	AT	AT	AT	AT	AT	TT
contig483849_156	C	T	CC	TC	CC	TC	TC	CC	TC	TC	CC	CC	CC	CC	TC	CC	TC	TC	CC	CC	CC	CC	TC	CC	CC	TC	TC	CC	CC	CC	TC	TC	TC	CC	CC	TC	TC	CC	TC	CC	TC	CC	CC	CC	TC	CC	CC	CC	TC
contig4092_133	A	C	CA	CA	AA	AA	CA	AA	AA	AA	AA	CA	AA	CA	CA	AA	AA	AA	AA	AA	CA	AA	CA	CA	CA	AA	AA	CA	CC	AA	CA	AA	CA	AA	CC	CA	CA	CA	AA	CA	CA	CA	AA	CA	CC	CC	AA	CA	CA
contig29426_110	T	A	AT	AT	TT	TT	AT	TT	TT	TT	TT	AT	TT	AT	AT	TT	TT	TT	TT	TT	AT	TT	AT	AT	AT	TT	TT	AT	TT	TT	AT	TT	AT	TT	AT	AT	AT	AT	TT	AT	AT	AT	TT	AT	AT	AT	TT	AT	AT
contig4092_102	G	A	GG	GG	AG	AG	GG	AG	AG	AA	AG	GG	AG	GG	GG	AG	AG	AG	AG	AG	GG	AG	GG	GG	GG	AG	AG	GG	AG	AG	GG	GG	GG	AG	GG	GG	GG	GG	GG	GG	GG	GG	AG	GG	GG	GG	AA	GG	GG
contig1896_133	G	A	GG	AG	GG	AG	AG	GG	AG	AG	GG	GG	GG	GG	AG	GG	AG	AG	GG	GG	GG	GG	AG	GG	GG	AG	AG	GG	GG	GG	AG	AG	AG	GG	GG	AG	AG	GG	AG	GG	AG	GG	GG	GG	AG	GG	AG	GG	AG
contig51986_68	C	G	GC	GC	CC	CC	GC	CC	CC	CC	CC	GC	CC	GC	GC	CC	CC	CC	CC	CC	GC	CC	GC	GC	GC	CC	CC	GC	CC	CC	GC	CC	GC	CC	GC	GC	GC	GC	CC	GC	GC	GC	CC	GC	GC	GC	CC	GC	GC
contig42244_74	T	C	TT	TT	CT	CT	TT	CT	CT	CT	CT	TT	CT	TT	TT	CT	CT	CT	CT	CT	TT	CT	TT	TT	TT	CT	CT	TT	CT	CT	TT	CT	TT	CT	TT	TT	TT	TT	CT	TT	TT	TT	CT	TT	TT	TT	CT	TT	TT
contig42244_80	T	C	TT	TT	CT	CT	TT	CT	CT	CT	CT	TT	CT	TT	TT	CT	CT	CT	CT	CT	TT	CT	TT	TT	TT	CT	CT	TT	CT	CT	TT	CT	TT	CT	TT	TT	TT	TT	CT	TT	TT	TT	CT	TT	TT	TT	CT	TT	TT
contig55422_279	G	A	AG	AG	GG	GG	AG	GG	GG	GG	GG	AG	GG	AG	AG	GG	GG	GG	GG	GG	AG	GG	AG	AG	AG	GG	GG	AG	GG	GG	AG	GG	AG	GG	AG	AG	AG	AG	GG	AG	AG	AG	GG	AG	AG	AG	GG	AG	AG
contig42244_70	G	T	TG	TG	GG	GG	TG	GG	GG	GG	GG	TG	GG	TG	TG	GG	GG	GG	GG	GG	TG	GG	TG	TG	TG	GG	GG	TG	GG	GG	TG	GG	TG	GG	TG	TG	TG	TG	GG	TG	TG	TG	GG	TG	TG	TG	GG	TG	TG
contig29455_59	C	T	TC	TC	CC	CC	TC	CC	CC	CC	CC	TC	CC	TC	TC	CC	CC	CC	CC	CC	TC	CC	TC	TC	TC	CC	CC	TC	CC	CC	TC	CC	TC	CC	TC	TC	TC	TC	CC	TC	TC	TC	CC	TC	TC	TC	CC	TC	TC
contig48357_47	T	C	TT	TT	CT	CT	TT	CT	CT	CT	CT	TT	CT	TT	TT	CT	CT	CT	CT	CT	TT	CT	TT	TT	TT	CT	CT	TT	CT	CT	TT	CT	TT	CT	TT	TT	TT	TT	CT	TT	TT	TT	CT	TT	TT	TT	CT	TT	TT
contig627240_225	G	C	GG	GG	CG	CG	GG	CG	CG	CG	CG	GG	CG	GG	GG	CG	CG	CG	CG	CG	GG	CG	GG	GG	GG	CG	CG	GG	CG	CG	GG	CG	GG	CG	GG	GG	GG	GG	CG	GG	GG	GG	CG	GG	GG	GG	CG	GG	GG
contig8513_103	A	G	GA	GA	AA	AA	GA	AA	AA	AA	AA	GA	AA	GA	GA	AA	AA	AA	AA	AA	GA	AA	GA	GA	GA	AA	AA	GA	AA	AA	GA	AA	GA	AA	GA	GA	GA	GA	AA	GA	GA	GA	AA	GA	GA	GA	AA	GA	GA
contig819481_66	T	C	TT	TT	CT	CT	TT	CT	CT	CT	CT	TT	CT	TT	TT	CT	CT	CT	CT	CT	TT	CT	TT	TT	TT	CT	CT	TT	CT	CT	TT	CT	TT	CT	TT	TT	TT	TT	CT	TT	TT	TT	CT	TT	TT	TT	CT	TT	TT
contig44478_146	T	G	TT	TT	GT	GT	TT	GT	GT	GT	GT	TT	GT	TT	TT	GT	GT	GT	GT	GT	TT	GT	TT	TT	TT	GT	GT	TT	GT	GT	TT	GT	TT	GT	TT	TT	TT	TT	GT	TT	TT	TT	GT	TT	TT	TT	GT	TT	TT
contig627240_50	A	C	CA	CA	AA	AA	CA	AA	AA	AA	AA	CA	AA	CC	CA	AA	AA	AA	AA	AA	CC	AA	CA	CC	CC	AA	AA	CC	AA	AA	CA	AA	CA	AA	CA	CA	CA	CA	AA	CC	CA	CA	AA	CA	CC	CC	AA	CA	CA
contig819481_114	C	A	CC	CC	AC	AC	CC	AC	AC	AC	AC	CC	AC	CC	CC	AC	AC	AC	AC	AC	CC	AC	CC	CC	CC	AC	AC	CC	AC	AC	CC	AC	CC	AC	CC	CC	CC	CC	AC	CC	CC	CC	AC	CC	CC	AC	AC	CC	CC
contig8513_3	T	C	TT	CT	TT	CT	CT	TT	CT	CT	TT	TT	TT	TT	CT	TT	CT	CT	TT	TT	TT	TT	CT	TT	TT	CT	CT	TT	TT	TT	CT	CT	CT	TT	TT	TT	CT	TT	CT	TT	CT	TT	TT	TT	TT	TT	TT	TT	CT
contig44478_205	A	G	AA	AA	GA	GA	AA	GA	GA	GA	GA	AA	GA	AA	AA	GA	GA	GA	GA	GA	AA	GA	AA	AA	AA	GA	GA	AA	GA	GA	AA	GA	AA	GA	AA	AA	AA	AA	GA	AA	AA	AA	GA	AA	AA	AA	GA	AA	AA
contig44478_178	T	G	GT	GT	TT	TT	GT	TT	TT	TT	TT	GT	TT	GT	GT	TT	TT	TT	TT	TT	GT	TT	GT	GT	GT	TT	TT	GT	TT	TT	GT	TT	GT	TT	GT	GT	GT	GT	TT	GT	GT	GT	TT	GT	GT	TT	TT	GT	GT
contig48357_11	C	T	TC	TC	CC	CC	TC	CC	CC	CC	CC	TC	CC	TC	TC	CC	CC	CC	CC	CC	TC	CC	TC	TC	TC	CC	CC	TC	CC	CC	TC	CC	TC	CC	TC	TC	TC	TC	CC	TC	TC	TC	CC	TC	TC	CC	CC	TC	TC
contig819481_117	C	G	GC	GC	CC	CC	GC	CC	CC	CC	CC	GC	CC	GC	GC	CC	CC	CC	CC	CC	GC	CC	GC	GC	GC	CC	CC	GC	CC	CC	GC	CC	GC	CC	GC	GC	GC	GC	CC	GC	GC	GC	CC	GC	GC	CC	CC	GC	GC
contig781823_105	C	T	TC	CC	TC	CC	CC	TC	CC	CC	TC	TC	TC	TC	CC	TC	CC	CC	TC	TC	TC	TC	CC	TC	TC	CC	CC	TC	TC	TC	CC	CC	CC	TC	TC	CC	CC	TC	CC	TC	CC	TC	TC	TC	TC	TC	TC	TC	CC
contig4478_30	C	G	GC	CC	GC	CC	CC	CC	CC	CC	GC	GC	GC	GC	CC	GC	CC	CC	GC	GC	GC	GC	CC	GC	GC	CC	CC	GC	GC	GC	CC	CC	CC	GC	GC	CC	CC	GC	CC	GC	CC	GC	GC	GC	GC	GC	GC	GC	CC
contig750306_51	G	A	GG	GG	AG	AG	GG	AG	AG	AG	AG	GG	AG	GG	GG	AG	AG	AG	AG	AG	GG	AG	GG	GG	GG	AG	AG	GG	AG	AG	GG	AG	GG	AG	GG	GG	GG	GG	AG	GG	GG	GG	AG	GG	GG	AG	AG	GG	GG
contig453466_80	T	C	TT	CT	TT	CT	CT	TT	CT	CT	TT	TT	TT	TT	CT	TT	CT	CT	TT	TT	TT	TT	CT	TT	TT	CT	CT	TT	TT	TT	CT	CT	CT	TT	TT	CT	CT	TT	CT	TT	CT	TT	TT	TT	CT	TT	CT	TT	CT
contig48357_61	G	C	GG	CG	GG	CG	CG	GG	CG	CG	GG	GG	GG	GG	CG	GG	CG	CG	GG	GG	GG	GG	CG	GG	GG	CG	CG	GG	GG	GG	CG	CG	CG	GG	GG	CG	CG	GG	CG	GG	CG	GG	GG	GG	GG	GG	GG	GG	CG
contig54577_92	T	C	TT	CT	TT	CT	CT	TT	CT	CT	TT	TT	TT	TT	CT	TT	CT	CT	TT	TT	TT	TT	CT	TT	TT	CT	CT	TT	TT	TT	CT	CT	CT	TT	TT	CT	CT	TT	CT	TT	CT	TT	TT	TT	TT	TT	TT	TT	CT
contig20092_87	T	C	CT	TT	CT	TT	TT	CT	TT	TT	CT	CT	CT	TT	TT	CT	TT	TT	CT	CT	CT	CT	TT	CT	CT	TT	TT	CT	CT	CT	TT	TT	TT	CT	CT	TT	TT	CT	TT	CT	TT	CT	CT	CT	CT	CT	CT	CT	TT
contig8513_46	A	T	TA	AA	TA	AA	AA	TA	AA	AA	TA	TA	TA	TA	AA	TA	AA	AA	TA	TA	TA	TA	AA	TA	TA	AA	AA	TA	TA	TA	AA	AA	AA	TA	TA	AA	AA	TA	AA	TA	AA	TA	TA	TA	TA	TA	AA	TA	AA
contig4478_46	A	C	CA	AA	CA	AA	AA	AA	AA	AA	CA	CA	CA	CA	AA	CA	AA	AA	CA	CA	CA	CA	AA	CA	CA	AA	AA	CA	CA	CA	AA	AA	AA	CA	CA	AA	AA	CA	AA	CA	AA	CA	CA	CA	CA	CA	CA	CA	AA
contig44478_201	G	A	AG	GG	AG	GG	GG	AG	GG	GG	AG	AG	AG	AG	GG	AG	GG	GG	AG	AG	AG	AG	GG	AG	AG	GG	GG	AG	AG	AG	GG	GG	GG	AG	AG	GG	GG	AG	GG	AG	GG	AG	AG	AG	AG	AG	AG	AG	GG
contig8513_102	C	T	CC	TC	CC	TC	TC	CC	TC	TC	CC	CC	CC	CC	TC	CC	TC	TC	CC	CC	CC	CC	TC	CC	CC	TC	TC	CC	CC	CC	TC	TC	TC	CC	CC	TC	TC	CC	TC	CC	TC	CC	CC	CC	CC	CC	TC	CC	TC
contig55422_51	C	T	TC	CC	TC	CC	CC	TC	CC	CC	TC	TC	TC	TC	CC	TC	CC	CC	TC	TC	TC	TC	CC	TC	TC	CC	CC	TC	TC	TC	CC	CC	CC	TC	TC	CC	CC	TC	CC	TC	CC	TC	TC	TC	TC	TC	CC	TC	CC
contig255239_147	C	T	TC	CC	TC	CC	CC	TC	CC	CC	TC	TC	TC	TC	CC	TC	CC	CC	TC	TC	TC	TC	CC	TC	TC	CC	CC	TC	TC	TC	CC	CC	CC	TC	TC	CC	CC	TC	CC	TC	CC	TC	TC	TC	TC	TC	CC	TC	CC
contig44478_128	G	A	GG	AG	GG	AG	AG	GG	AG	AG	GG	GG	GG	GG	AG	GG	AG	AG	GG	GG	GG	GG	AG	GG	GG	AG	AG	GG	GG	GG	AG	AG	AG	GG	GG	AG	AG	GG	AG	GG	AG	GG	GG	GG	GG	GG	AG	GG	AG
contig627240_226	C	A	CC	AC	CC	AC	AC	CC	AC	AC	CC	CC	CC	CC	AC	CC	AC	AC	CC	CC	CC	CC	AC	CC	CC	AC	AC	CC	CC	CC	AC	AC	AC	CC	CC	AC	AC	CC	AC	CC	AC	CC	CC	CC	AC	CC	AC	CC	AC
contig20153_86	T	C	TT	CT	TT	CT	CT	TT	CT	CT	TT	TT	TT	TT	CT	TT	CT	CT	TT	TT	TT	TT	CT	TT	TT	CT	CT	TT	TT	TT	CT	CT	CT	TT	TT	CT	CT	TT	CT	TT	CT	TT	TT	TT	CT	TT	CT	TT	CT
contig55422_145	G	T	GG	TG	GG	TG	TG	GG	TG	TG	GG	GG	GG	GG	TG	GG	TG	TG	GG	GG	GG	GG	TG	GG	GG	TG	TG	GG	GG	GG	TG	TG	TG	GG	GG	TG	TG	GG	TG	GG	TG	GG	GG	GG	GG	GG	TG	GG	TG
contig16814_156	C	T	TC	CC	TT	TC	CC	TT	TC	TC	TT	TC	TT	TC	CC	TT	TC	TC	TT	TT	TC	TT	CC	TC	TC	TC	TC	TC	TT	TT	CC	TC	CC	TT	TC	CC	CC	TC	TC	TC	CC	TC	TT	TC	TT	TT	CC	TC	CC
contig54577_265	T	G	GT	TT	GT	TT	TT	GT	TT	TT	GT	GT	GT	GT	TT	GT	TT	TT	GT	GT	GT	GT	TT	GT	GT	TT	TT	GT	GT	GT	TT	TT	TT	GT	GT	TT	TT	GT	TT	GT	TT	GT	GT	GT	GT	GT	TT	GT	TT
contig16814_171	C	G	CC	GC	CC	GC	GC	CC	GC	GC	CC	CC	CC	CC	GC	CC	GC	GC	CC	CC	CC	CC	GC	CC	CC	GC	GC	CC	CC	CC	GC	GC	GC	CC	CC	GC	GC	CC	GC	CC	GC	CC	CC	CC	GC	CC	GC	CC	GC
contig343860_142	T	A	TT	AT	TT	AT	AT	TT	AT	AT	TT	TT	TT	TT	AT	TT	AT	AT	TT	TT	TT	TT	AT	TT	TT	AT	AT	TT	TT	TT	AT	AT	AT	TT	TT	AT	AT	TT	AT	TT	AT	TT	TT	TT	AT	TT	AT	TT	AT
contig255239_119	C	T	TC	CC	TC	CC	CC	TC	CC	CC	TC	TC	TC	TC	CC	TC	CC	CC	TC	TC	TC	TC	CC	TC	TC	CC	CC	TC	TC	TC	CC	CC	CC	TC	TC	CC	CC	TC	CC	TC	CC	TC	TC	TC	TC	TC	CC	TC	CC
contig8513_38	C	T	TC	CC	TC	CC	CC	TC	CC	CC	TC	TC	TC	TC	CC	TC	CC	CC	TC	TC	TC	TC	CC	TC	TC	CC	CC	TC	TC	TC	CC	CC	CC	TC	TC	CC	CC	TC	CC	TC	CC	TC	TC	TC	TC	TC	CC	TC	CC
contig48357_96	T	G	GT	TT	GT	TT	TT	GT	TT	TT	GT	GT	GT	GT	TT	GT	TT	TT	GT	GT	GT	GT	TT	GT	GT	TT	TT	GT	GT	GT	TT	TT	TT	GT	GT	TT	TT	GT	TT	GT	TT	GT	GT	GT	GT	GT	TT	GT	TT
contig42244_130	G	A	GG	AG	GG	AG	AG	GG	AG	AG	GG	GG	GG	GG	AG	GG	AG	AG	GG	GG	GG	GG	AG	GG	GG	AG	AG	GG	GG	GG	AG	AG	AG	GG	GG	AG	AG	GG	AG	GG	AG	GG	GG	GG	GG	GG	AG	GG	AG
contig29426_109	C	T	CC	TC	CC	TC	TC	CC	TC	TC	CC	CC	CC	CC	TC	CC	TC	TC	CC	CC	CC	CC	TC	CC	CC	TC	TC	CC	CC	CC	TC	TC	TC	CC	CC	TC	TC	CC	TC	CC	TC	CC	CC	CC	CC	CC	TC	CC	TC
contig16814_120	C	T	TC	CC	TC	CC	CC	TC	CC	CC	TC	TC	TC	TC	CC	TC	CC	CC	TC	TC	TC	TC	CC	TC	TC	CC	CC	TC	TC	TC	CC	CC	CC	TC	TC	CC	CC	TC	CC	TC	CC	TC	TC	TC	TC	TC	CC	TC	CC
contig255239_79	C	T	TC	CC	TC	CC	CC	TC	CC	CC	TC	TC	TC	TC	CC	TC	CC	CC	TC	TC	TC	TC	CC	TC	TC	CC	CC	TC	TC	TC	CC	CC	CC	TC	TC	CC	CC	TC	CC	TC	CC	TC	TC	TC	TC	TC	TC	TC	CC
contig627240_69	A	T	TA	AA	TT	TA	AA	TT	TA	TA	TT	TA	TT	TT	AA	TT	TA	TA	TT	TT	TT	TT	AA	TT	TT	TA	TA	TT	TT	TT	AA	TA	AA	TT	TA	AA	AA	TA	TA	AA	AA	TA	TT	TA	TT	TT	TA	TA	AA
contig343860_2	G	C	CG	GG	CG	GG	GG	CG	GG	GG	CG	CG	CG	CG	GG	CG	GG	GG	CG	CG	CG	CG	GG	CG	CG	GG	GG	CG	CG	CG	GG	GG	GG	CG	CG	GG	GG	CG	GG	CG	GG	CG	CG	CG	CG	CG	GG	CG	GG
contig16814_153	T	C	CT	TT	CC	CT	TT	CC	CT	CT	CC	CT	CC	CT	TT	CC	CT	CT	CC	CC	CT	CC	TT	CT	CT	CT	CT	CT	CC	CC	TT	CT	TT	CC	CT	TT	TT	CT	CT	CT	TT	CT	CC	CT	CC	CC	TT	CT	TT
contig16814_155	A	C	CA	AA	CC	CA	AA	CC	CA	CA	CC	CA	CC	CA	AA	CC	CA	CA	CC	CC	CA	CC	AA	CA	CA	CA	CA	CA	CC	CC	AA	CA	AA	CC	CA	AA	AA	CA	CA	CA	AA	CA	CC	CA	CC	CC	AA	CA	AA
contig4092_187	C	G	CC	GC	CC	GC	GC	CC	GC	CC	CC	CC	CC	CC	GC	CC	GG	GC	CC	CC	CC	CC	GC	CC	CC	GC	GC	CC	CC	CC	GC	GG	GC	CC	CC	GC	GC	CC	GG	CC	GC	CC	CC	CC	GC	CC	GG	CC	GC
contig48814_171	T	C	TT	CT	TT	TT	CT	TT	CT	TT	TT	TT	TT	TT	CT	TT	CT	CT	TT	TT	TT	TT	CT	TT	TT	CT	CT	TT	TT	TT	CT	CT	CT	TT	TT	CT	CT	TT	CT	TT	CT	TT	TT	TT	CT	TT	CT	TT	CT
contig813406_156	A	C	AA	CA	AA	AA	CA	AA	CA	AA	AA	AA	AA	AA	CA	AA	CA	CA	AA	AA	AA	AA	CA	AA	AA	CA	CA	AA	AA	AA	CA	CA	CA	AA	AA	CA	CA	AA	CA	AA	CA	AA	AA	AA	CA	AA	CA	AA	CA
contig440520_238	G	A	AG	GG	AG	AG	GG	AG	GG	AG	AG	AG	AG	AG	GG	AG	GG	GG	AG	AG	AG	AG	GG	AG	AG	GG	GG	AG	AG	AG	GG	GG	GG	AG	AG	GG	GG	AG	GG	AG	GG	AG	AG	AG	GG	AA	GG	AG	GG
contig103255_116	A	G	AA	GA	AA	AA	GA	AA	GA	AA	AA	AA	AA	AA	GA	AA	GA	GA	AA	AA	AA	AA	GA	AA	AA	GA	GG	AA	AA	AA	GA	GA	GA	AA	AA	GA	GA	AA	GA	AA	GA	AA	AA	AA	GA	AA	GA	AA	GA
contig15982_158	C	T	CC	TC	CC	CC	TC	CC	TC	CC	CC	CC	CC	CC	TC	CC	TC	TC	CC	CC	CC	CC	TC	CC	CC	TC	TC	CC	CC	CC	TC	TC	TC	CC	CC	TC	TC	CC	TC	CC	TC	CC	CC	CC	TC	CC	TC	CC	TC
contig48814_237	G	A	AG	GG	AG	AG	GG	AG	GG	AG	AG	AG	AG	AG	GG	AG	GG	GG	AG	AG	AG	AG	GG	AG	AG	GG	GG	AG	AG	AG	GG	GG	GG	AG	AG	GG	GG	AG	GG	AG	GG	AG	AG	AG	GG	AG	GG	AG	GG
contig28211_21	A	G	AA	GA	AA	AA	GA	AA	GA	AA	AA	AA	AA	AA	GA	AA	GA	GA	AA	AA	AA	AA	GA	AA	AA	GA	GA	AA	AA	AA	GA	GA	GA	AA	AA	GA	GA	AA	GA	AA	GA	AA	AA	AA	GA	AA	GA	AA	GA
contig103255_115	T	C	TT	CT	TT	TT	CT	TT	CT	TT	TT	TT	TT	TT	CT	TT	CT	CT	TT	TT	TT	TT	CT	TT	TT	CT	CT	TT	TT	TT	CT	CT	CT	TT	TT	CT	CT	TT	CT	TT	CT	TT	TT	TT	CC	TT	CC	TT	CT
contig14309_36	C	A	CC	CC	AC	AC	CC	AC	AC	AC	AC	CC	AC	CC	CC	AC	AC	AC	AC	AC	CC	AC	CC	CC	CC	AC	CC	CC	AC	AC	CC	AC	CC	AC	CC	CC	CC	CC	AC	CC	CC	AC	AC	CC	CC	AC	CC	CC	CC
contig103255_42	G	A	GG	AG	GG	GG	AG	GG	AG	GG	GG	GG	GG	GG	AG	GG	AG	AG	GG	GG	GG	GG	AG	GG	GG	AG	AG	GG	GG	GG	AG	AG	AG	GG	GG	AG	AG	GG	AG	GG	AG	GG	GG	GG	AA	GG	AA	GG	AG
contig440520_78	T	C	TT	CT	TT	TT	CT	TT	CT	TT	TT	TT	TT	TT	CT	TT	CT	CT	TT	TT	TT	TT	CT	TT	TT	CT	CT	TT	TT	TT	CT	CT	CT	TT	TT	CT	CT	TT	CT	TT	CT	TT	TT	TT	CT	TT	TT	TT	CT
contig103255_114	A	G	AA	GA	AA	AA	GA	AA	GA	AA	AA	AA	AA	AA	GA	AA	GA	GA	AA	AA	AA	AA	GA	AA	AA	GA	GA	AA	AA	AA	GA	GA	GA	AA	AA	GA	GA	AA	GA	AA	GA	AA	AA	AA	GG	AA	GG	AA	GA
contig343094_64	T	C	CT	TT	CC	CC	TT	CC	TT	CC	CC	CT	CC	CT	TT	CC	TT	TT	CC	CC	CT	CC	TT	CT	CT	CT	TT	CT	CC	CC	TT	CT	TT	CC	CT	TT	TT	CT	CT	CT	TT	CC	CC	CT	CT	CC	CT	CT	TT
contig42404_50	C	T	TC	CC	TC	TC	CC	TC	CC	TC	TC	TC	TC	TC	CC	TC	CC	CC	TC	TC	TC	TC	CC	TC	TC	CC	CC	TC	TC	TC	CC	CC	CC	TC	TC	CC	CC	TC	CC	TC	CC	TC	TC	TC	TC	TC	TC	TC	CC
contig103255_59	A	T	TA	AA	TA	TA	AA	TA	AA	TA	TA	TA	TA	TA	AA	TA	AA	AA	TA	TA	TA	TA	AA	TA	TA	AA	AA	TA	TA	TA	AA	AA	AA	TA	TA	AA	AA	TA	AA	TA	AA	TA	TA	TA	TA	TA	TA	TA	AA
contig14309_33	G	A	GG	AG	GG	GG	AG	GG	AG	GG	GG	GG	GG	GG	AG	GG	AG	AG	GG	GG	GG	GG	AG	GG	GG	AG	AG	GG	GG	GG	AG	AG	AG	GG	GG	AG	AG	GG	AG	GG	AG	GG	GG	GG	GG	GG	GG	GG	AG
contig48814_17	T	C	CC	CT	CT	CT	CT	CC	TT	CT	CT	CC	CT	CC	CT	CT	TT	TT	CT	CT	CC	CT	CT	CC	CC	TT	CT	CC	CT	CT	CT	TT	CT	CT	CC	CT	CT	CC	TT	CC	CT	CT	CT	CC	CC	CC	CC	CC	CT
contig48814_12	C	T	CC	TC	CC	CC	TC	CC	TC	CC	CC	CC	CC	CC	TC	CC	TC	TC	CC	CC	CC	CC	TC	CC	CC	TC	TC	CC	CC	CC	TC	TC	TC	CC	CC	TC	TC	CC	TC	CC	TC	CC	CC	CC	CC	CC	CC	CC	TC
contig103255_13	T	A	TT	AT	TT	TT	AT	TT	AT	TT	TT	TT	TT	TT	AT	TT	AT	AT	TT	TT	TT	TT	AT	TT	TT	AT	AT	TT	TT	TT	AT	AT	AT	TT	TT	AT	AT	TT	AT	TT	AT	TT	TT	TT	AT	TT	TT	TT	AT
contig41815_71	A	T	TA	AA	TT	TT	AA	TT	TA	TT	TT	TA	TT	TA	AA	TT	TA	TA	TT	TT	TA	TT	AA	TA	TA	TA	AA	TA	TT	TT	AA	TA	AA	TT	TA	AA	AA	TA	TA	TA	AA	TT	TT	TA	TA	TT	TA	TA	AA
contig14309_76	A	G	AA	GA	GA	GA	GA	AA	GG	GA	GA	AA	GA	AA	GA	GA	GG	GG	GA	GA	AA	GA	GA	AA	AA	GG	GA	AA	GA	GA	GA	GG	GA	GA	AA	GA	GA	AA	GG	AA	GA	GA	GA	AA	AA	AA	GG	AA	GA
contig14309_44	T	C	TT	TT	CT	CT	TT	CT	CT	CT	CT	TT	CT	TT	TT	CT	CT	CT	CT	CT	TT	CT	TT	TT	TT	CT	TT	TT	CT	CT	TT	CT	TT	CT	TT	TT	TT	TT	CT	TT	TT	CT	CT	TT	TT	CT	CT	TT	TT
contig440520_47	C	T	CC	CC	TC	TC	CC	TC	TC	TC	TC	CC	TC	CC	CC	TC	TC	TC	TC	TC	CC	TC	CC	CC	CC	TC	CC	CC	TC	TC	CC	TC	CC	TC	CC	CC	CC	CC	TC	CC	CC	TC	TC	CC	CC	TC	TC	CC	CC
contig14309_78	T	C	TT	CT	CT	CT	TT	CC	CC	CT	CT	TT	CT	TT	CT	CT	CC	CC	CT	CT	TT	CT	CT	TT	TT	CC	CT	TT	CT	CT	CT	CC	CT	CT	TT	CT	CT	TT	CC	TT	CT	CT	CT	TT	TT	CT	CC	TT	CT
contig47970_22	G	T	GG	GG	TG	TG	GG	TG	TG	TG	TG	GG	TG	GG	GG	TG	TG	TG	TG	TG	GG	TG	GG	GG	GG	TG	GG	GG	TG	TG	GG	TG	GG	TG	GG	GG	GG	GG	TG	GG	GG	TG	TG	GG	GG	TG	TG	GG	GG
contig42404_47	G	C	CG	CG	GG	GG	CG	GG	GG	GG	GG	CG	GG	CG	CG	GG	GG	GG	GG	GG	CG	GG	CG	CG	CG	GG	CG	CG	GG	GG	CG	GG	CG	GG	CG	CG	CG	CG	GG	CG	CG	GG	GG	CG	CG	GG	GG	CG	CG
contig669223_23	C	T	TC	TC	CC	CC	TC	CC	CC	CC	CC	TC	CC	TC	TC	CC	CC	CC	CC	CC	TC	CC	TC	TC	TC	CC	TC	TC	CC	CC	TC	CC	TC	CC	TC	TC	TC	TC	CC	TC	TC	CC	CC	TC	TC	TC	CC	TC	TC
contig47230_143	G	C	GG	GG	CG	CG	GG	CG	CG	CG	CG	GG	CG	GG	GG	CG	CG	CG	CG	CG	GG	CG	GG	GG	GG	CG	GG	GG	CG	CG	GG	CG	GG	CG	GG	GG	GG	GG	CG	GG	GG	CG	CG	GG	GG	CG	CG	GG	GG
contig440520_224	G	A	AG	AG	GG	GG	AG	GG	GG	GG	GG	AG	GG	AG	AG	GG	GG	GG	GG	GG	AG	GG	AG	AG	AG	GG	AG	AG	GG	GG	AG	GG	AG	GG	AG	AG	AG	AG	GG	AG	AG	GG	GG	AG	AG	GG	GG	AG	AG
contig59048_113	T	C	TT	TT	CT	CT	TT	CT	CT	CT	CT	TT	CT	TT	TT	CT	CT	CT	CT	CT	TT	CT	TT	TT	TT	CT	TT	TT	CT	CT	TT	CT	TT	CT	TT	TT	TT	TT	CT	TT	TT	CT	CT	TT	TT	CT	CT	TT	TT
contig813406_48	G	C	CG	CG	GG	GG	CG	GG	GG	GG	GG	CG	GG	CG	CG	GG	GG	GG	GG	GG	CG	GG	CG	CG	CG	GG	CG	CG	GG	GG	CG	GG	CG	GG	CG	CG	CG	CG	GG	CG	CG	GG	GG	CG	CG	GG	GG	CG	CG
contig783034_93	T	G	TT	TT	GT	GT	TT	GT	GT	GT	GT	TT	GT	TT	TT	GT	GT	GT	GT	GT	TT	GT	TT	TT	TT	GT	TT	TT	GT	GT	TT	GT	TT	GT	TT	TT	TT	TT	GT	TT	TT	GT	GT	TT	TT	GT	GT	TT	TT
contig829947_44	G	A	GG	GG	AG	AG	GG	AG	AG	AG	AG	GG	AG	GG	GG	AG	AG	AG	AG	AG	GG	AG	GG	GG	GG	AG	GG	GG	AG	AG	GG	AG	GG	AG	GG	GG	GG	GG	AG	GG	GG	AG	AG	GG	GG	AG	AG	GG	GG
contig84851_186	A	T	AA	TA	AA	AA	TA	AA	TA	AA	AA	AA	AA	AA	TA	AA	TA	TA	AA	AA	AA	AA	TA	AA	AA	TA	TA	AA	AA	AA	TA	TA	TA	AA	AA	TA	TA	AA	TA	AA	TA	AA	AA	AA	TA	AA	TA	AA	TA
contig14309_66	C	T	TC	TC	CC	CC	TC	CC	CC	CC	CC	TC	CC	TC	TC	CC	CC	CC	CC	CC	TC	CC	TC	TC	TC	CC	TC	TC	CC	CC	TC	CC	TC	CC	TC	TC	TC	TC	CC	TC	TC	CC	CC	TC	TC	CC	CC	TC	TC
contig59048_115	C	G	GC	GC	CC	CC	GC	CC	CC	CC	CC	GC	CC	CC	GC	CC	CC	CC	CC	CC	GC	CC	GC	GC	GC	CC	GC	GC	CC	CC	GC	CC	GC	CC	GC	CC	GC	GC	CC	GC	GC	CC	CC	CC	GC	CC	CC	GC	GC
contig6270_97	A	T	AA	TA	AA	AA	TA	AA	TA	AA	AA	AA	AA	AA	TA	AA	TA	TA	AA	AA	AA	AA	TA	AA	AA	TA	TA	AA	AA	AA	TA	TA	TA	AA	AA	TA	TA	AA	TA	AA	TA	AA	AA	AA	TA	AA	TA	AA	TA
contig697418_111	C	T	CC	CC	TC	TC	CC	TC	TC	TC	TC	CC	TC	CC	CC	TC	TC	TC	TC	TC	CC	TC	CC	CC	CC	TC	CC	CC	TC	TC	CC	TC	CC	TC	CC	CC	CC	CC	TC	CC	CC	TC	TC	CC	CC	TC	TC	CC	CC
contig729022_32	T	C	CT	CT	TT	TT	CT	TT	TT	TT	TT	CT	TT	CT	CT	TT	TT	TT	TT	TT	CT	TT	CT	CT	CT	TT	CT	CT	TT	TT	CT	TT	TT	TT	CT	CT	CC	CT	TT	CT	TT	TT	TT	CT	CC	TT	TT	CT	CT
contig654403_135	T	C	TT	TT	CT	CT	TT	CT	CT	CT	CT	TT	CT	TT	TT	CT	CT	CT	CT	CT	TT	CT	TT	TT	TT	CT	TT	TT	CT	CT	TT	CT	TT	CT	TT	TT	TT	TT	CT	TT	TT	CT	CT	TT	TT	CT	CT	TT	TT
contig13630_116	G	A	AG	GG	AG	AG	GG	AG	GG	AG	AG	AG	AG	AG	GG	AG	GG	GG	AG	AG	AG	AG	AG	AG	AG	GG	GG	AG	AG	AG	GG	GG	GG	AG	AG	GG	GG	AG	GG	AG	GG	AG	AG	AG	AG	AG	GG	AG	GG
contig5028_3	G	A	GG	GG	AG	AG	GG	AG	AG	AG	AG	GG	AG	GG	GG	AG	AG	AG	AG	AG	GG	AG	GG	GG	GG	AG	GG	GG	AG	AG	GG	AG	GG	AG	GG	GG	GG	GG	AG	GG	GG	AG	AG	GG	GG	AG	AG	GG	GG
contig5028_44	T	A	AT	AT	TT	TT	AT	TT	TT	TT	TT	AT	TT	AT	AT	TT	TT	TT	TT	TT	AT	TT	AT	AT	AT	TT	AT	AT	TT	TT	AT	TT	AT	TT	AT	AT	AT	AT	TT	AT	AT	TT	TT	AT	AT	TT	TT	AT	AT
contig697481_145	C	T	CC	CC	TC	TC	CC	TC	TC	TC	TC	CC	TC	CC	CC	TC	TC	TC	TC	TC	CC	TC	CC	CC	CC	TC	CC	CC	TC	TC	CC	TC	CC	TC	CC	CC	CC	CC	TC	CC	CC	TC	TC	CC	CC	TC	TC	CC	CC
contig5028_128	T	C	CT	CT	TT	TT	CT	TT	TT	TT	TT	CT	TT	CT	CT	TT	TT	TT	TT	TT	CT	TT	CT	CT	CT	TT	CT	CT	TT	TT	CT	TT	CT	TT	CT	CT	CT	CT	TT	CT	CT	TT	TT	CT	CT	TT	TT	CT	CT
contig4610_219	C	T	CC	CC	TC	TC	CC	TC	TC	TC	TC	CC	TC	CC	CC	TC	CC	TC	TC	TC	CC	TC	CC	CC	CC	TC	CC	CC	TC	TC	CC	TC	CC	TC	CC	CC	CC	CC	TC	CC	CC	TC	TC	CC	CC	TC	TC	CC	CC
contig32268_28	G	A	AG	AG	GG	GG	AG	GG	GG	GG	GG	AG	GG	AG	AG	GG	AG	GG	GG	GG	AG	GG	AG	AG	AG	GG	AG	AG	GG	GG	AG	GG	AG	GG	AG	AG	AG	AG	GG	AG	AG	GG	GG	AG	AG	GG	GG	AG	AG
contig697481_89	A	G	AA	AA	GA	GA	AA	GA	GA	GA	GA	AA	GA	AA	AA	GA	AA	GA	GA	GA	AA	GA	AA	AA	AA	GA	AA	AA	GA	GA	AA	GA	AA	GA	AA	AA	AA	AA	GA	AA	AA	GA	GA	AA	AA	GA	GA	AA	AA
contig13630_158	G	T	TG	GG	TT	TT	GG	TT	TG	TT	TT	TG	TT	TG	GG	TT	GG	TG	TT	TT	TG	TT	TG	GG	TG	TG	GG	TG	TT	TT	GG	TG	GG	TT	TG	GG	GG	TG	TG	TG	GG	TT	TT	TG	TG	TT	TT	TG	GG
contig4610_196	A	T	AA	AA	TA	TA	AA	TA	TA	TA	TA	AA	TA	AA	AA	TA	AA	TA	TA	TA	AA	TA	AA	AA	AA	TA	AA	AA	TA	TA	AA	TA	AA	TA	AA	AA	AA	AA	TA	AA	AA	TA	TA	AA	AA	TA	TA	AA	AA
contig21970_156	C	T	TC	CC	TC	TC	CC	TC	CC	TC	TC	TC	TC	TC	CC	TC	CC	CC	TC	TC	TC	CC	TC	TC	TC	CC	CC	TC	TC	TC	CC	CC	CC	TC	TC	CC	CC	TC	CC	TC	TC	TC	TC	TC	TC	TC	TC	TC	CC
contig4610_184	T	A	AT	TT	AT	AT	TT	AT	TT	AT	AT	AT	AT	AT	TT	AT	TT	TT	AT	AT	AT	AT	AT	AT	AT	TT	TT	AT	AT	AT	TT	TT	TT	AT	AT	TT	TT	AT	TT	AT	AT	AT	AT	AT	AT	AT	AT	AT	TT
contig32268_183	G	T	GG	TG	GG	GG	TG	GG	TG	GG	GG	GG	GG	GG	TG	GG	TG	TG	GG	GG	GG	GG	GG	GG	GG	TG	TG	GG	GG	GG	TG	TG	TG	GG	GG	TG	TG	GG	TG	GG	GG	GG	GG	GG	GG	GG	GG	GG	TG
contig32268_159	C	T	TC	TC	CC	CC	TC	CC	CC	CC	CC	TC	CC	TC	TC	CC	TC	CC	CC	CC	TC	CC	TC	TC	TC	CC	TC	TC	CC	CC	TC	CC	TC	CC	TC	TC	TC	TC	CC	TC	TC	CC	CC	TC	TC	CC	CC	TC	TC
contig487869_66	C	T	CC	TC	TC	TC	TC	TC	TT	TC	TC	CC	TC	CC	TC	TC	TC	TT	TC	TC	CC	TT	CC	CC	CC	TT	TC	CC	TC	TC	TC	TT	TC	CC	CC	TC	TC	CC	TT	CC	CC	TC	TC	CC	TC	TC	TC	CC	TC
contig32268_83	G	A	AG	GG	AG	AG	GG	AG	GG	AG	AG	AG	AG	AG	GG	AG	GG	GG	AG	AG	AG	AG	AG	AG	AG	GG	GG	AG	AG	AG	GG	GG	GG	AG	AG	GG	GG	AG	GG	AG	AG	AG	AG	AG	AG	AG	AG	AG	GG
contig4610_16	C	T	TC	CC	TC	TC	CC	TC	CC	TC	TC	TC	TC	TC	CC	TC	CC	CC	TC	TC	TC	TC	TC	TC	TC	CC	CC	TC	TC	TC	CC	CC	CC	TC	TC	CC	CC	TC	CC	TC	TC	TC	TC	TC	TC	TC	TC	TC	CC
contig21970_88	T	C	CT	TT	CT	CT	TT	CT	TT	CT	CT	CT	CT	CT	TT	CT	TT	TT	CT	CT	CT	TT	CT	CT	CT	TT	TT	CT	CT	CT	TT	TT	TT	CT	CT	TT	TT	CT	TT	CT	CT	CT	CT	CT	CT	CT	CT	CT	TT
contig21970_126	A	G	GA	AA	GA	GA	AA	GA	AA	GA	GA	GA	GA	GA	AA	GA	AA	AA	GA	GA	GA	AA	GA	GA	GA	AA	AA	GA	GA	GA	AA	AA	AA	GA	GA	AA	AA	GA	AA	GA	GA	GA	GA	GA	GA	GA	GA	GA	AA
contig41756_91	C	T	CC	CC	TC	TC	CC	TC	TC	TC	TC	CC	TC	CC	CC	TC	CC	TC	TC	TC	CC	TC	CC	CC	CC	TC	CC	CC	TC	TC	CC	TC	CC	TC	CC	CC	CC	CC	TC	CC	CC	TC	TC	CC	TC	CC	TC	CC	CC
contig678252_9	C	T	CC	TC	CC	CC	TC	CC	TC	CC	CC	CC	CC	CC	TC	CC	TC	TC	CC	CC	CC	CC	CC	CC	CC	TC	TC	CC	CC	CC	TC	TC	TC	CC	CC	TC	TC	CC	TC	CC	CC	CC	CC	CC	CC	CC	TC	CC	TC
contig41108_20	T	A	AT	AT	TT	TT	AT	TT	TT	TT	TT	AA	TT	AT	AT	TT	AT	TT	TT	TT	AT	TT	AT	AT	AT	TT	AT	AT	TT	TT	AT	TT	AT	TT	AT	AT	AT	AT	TT	AT	AT	TT	TT	AT	AA	AA	TT	AT	AT
contig41756_44	T	G	TT	TT	GT	GT	TT	GT	GT	GT	GT	TT	GT	TT	TT	GT	TT	GT	GT	GT	TT	GT	TT	TT	TT	GT	TT	TT	GT	GT	TT	GT	TT	GT	TT	TT	TT	TT	GT	TT	TT	GT	GT	TT	GT	TT	GT	TT	TT
contig41108_19	C	T	TC	CC	TT	TT	CC	TT	TC	TT	TT	TC	TT	TC	CC	TT	CC	TC	TT	TT	TC	TT	TC	TC	TC	TC	CC	TC	TT	TT	CC	TC	CC	TT	TC	CC	CC	TC	TC	TC	TC	TT	TT	TC	CC	TT	TT	TC	CC
contig26833_91	G	A	AG	AG	GG	GG	AG	GG	GG	GG	GG	AG	GG	AG	AG	GG	AG	GG	GG	GG	AG	GG	AG	AG	AG	GG	AG	AG	GG	GG	AG	GG	AG	GG	AG	AG	AG	AG	GG	AG	AG	GG	GG	AG	AG	AG	GG	AG	AG
contig57492_67	G	T	GG	TG	GG	GG	TG	GG	TG	GG	GG	GG	GG	GG	TG	GG	TG	TG	GG	GG	GG	GG	GG	GG	GG	TG	TG	GG	GG	GG	TG	TG	TG	GG	GG	TG	TG	GG	TG	GG	GG	GG	GG	GG	TG	GG	TG	GG	TG
contig41756_86	G	C	CG	CG	GG	GG	CG	GG	GG	GG	GG	CG	GG	CG	CG	GG	CG	GG	GG	GG	CG	GG	CG	CG	CG	GG	CG	CG	GG	GG	CG	GG	CG	GG	CG	CG	CG	CG	GG	CG	CG	GG	GG	CG	CG	CG	GG	CG	CG
contig41108_18	C	A	AC	CC	AA	AA	CC	AA	AC	AA	AA	AA	AA	AC	CC	AA	CC	AC	AA	AA	AC	AA	AC	AC	AC	AC	CC	AC	AA	AA	CC	AC	CC	AA	AC	CC	CC	AC	AC	AC	AC	AA	AA	AC	CC	AA	AA	AC	CC
contig26833_68	C	T	CC	TC	CC	CC	TC	CC	TC	CC	CC	CC	CC	CC	TC	CC	TC	TC	CC	CC	CC	CC	CC	CC	CC	TC	TC	CC	CC	CC	TC	TC	TC	CC	CC	TC	TC	CC	TC	CC	CC	CC	CC	CC	TC	CC	TC	CC	TC
contig41108_147	C	G	GC	CC	GC	GC	CC	GC	CC	GC	GC	GC	GC	GC	CC	GC	CC	CC	GC	GC	GC	GC	GC	GC	GC	CC	CC	GC	GC	GC	CC	CC	CC	GC	GC	CC	CC	GC	CC	GC	GC	GC	GC	GC	CC	GC	CC	GC	CC
contig41756_67	A	G	GA	AA	GA	GA	AA	GA	AA	GA	GA	GA	GA	GA	AA	GA	AA	AA	GA	GA	GA	GA	GA	GA	GA	AA	AA	GA	GA	GA	AA	AA	AA	GA	GA	AA	AA	GA	AA	GA	GA	GA	GA	GA	AA	GA	AA	GA	AA
contig41756_189	C	T	CC	TC	CC	CC	TC	CC	TC	CC	CC	CC	CC	CC	TC	CC	TC	TC	CC	CC	CC	CC	CC	CC	CC	TC	TC	CC	CC	CC	TC	TC	TC	CC	CC	TC	TC	CC	TC	CC	CC	CC	CC	CC	CC	CC	TC	CC	TC
contig41108_127	C	A	CC	AC	CC	CC	AC	CC	AC	CC	CC	CC	CC	CC	AC	CC	AC	AC	CC	CC	CC	CC	CC	CC	CC	AC	AC	CC	CC	CC	AC	AC	AC	CC	CC	AC	AC	CC	AC	CC	CC	CC	CC	CC	CC	CC	AC	CC	AC
contig26833_100	T	C	TT	CT	TT	TT	CT	TT	CT	TT	TT	TT	TT	TT	CT	TT	CT	CT	TT	TT	TT	TT	TT	TT	TT	CT	CT	TT	TT	TT	CT	CT	CT	TT	TT	CT	CT	TT	CT	TT	TT	TT	TT	TT	TT	TT	CT	TT	CT
contig623372_83	G	T	TG	GG	TG	TG	GG	TG	GG	TG	TG	TG	TG	TG	GG	TG	GG	GG	TG	TG	TG	TG	TG	TG	TG	GG	GG	TG	TG	TG	GG	GG	GG	TG	TG	GG	GG	TG	GG	TG	TG	TG	TG	TG	TG	TG	TG	TG	GG
contig4155_66	G	A	AG	AG	GG	GG	AG	GG	GG	GG	GG	AG	GG	AG	AG	GG	AG	GG	GG	GG	AG	GG	AG	AG	AG	GG	AG	AG	GG	GG	AG	GG	AG	GG	AG	AG	AG	AG	GG	AG	AG	GG	GG	AG	AG	GG	GG	AG	AG
contig466098_59	C	T	TC	TC	CC	CC	TC	CC	CC	CC	CC	TC	CC	TC	TC	CC	TC	CC	CC	CC	TC	CC	TC	TC	TC	CC	TC	TC	CC	CC	TC	CC	TC	CC	TC	TC	TC	TC	CC	TC	TC	CC	CC	TC	TC	TC	CC	TC	TC
contig466098_50	T	A	TT	TT	AT	AT	TT	AT	AT	AT	AT	TT	AT	TT	TT	AT	TT	AT	AT	AT	TT	AT	TT	TT	TT	AT	TT	TT	AT	AT	TT	AT	TT	AT	TT	TT	TT	TT	AT	TT	TT	AT	AT	TT	TT	TT	AT	TT	TT
contig45407_41	G	A	GG	AG	AG	AG	AG	AG	AA	AA	AG	GG	AG	GG	AG	AG	AG	AA	AG	AG	GG	AG	GG	GG	GG	AA	AG	GG	AG	AG	AG	AA	AG	AG	GG	AG	AG	GG	AA	GG	GG	AA	AG	GG	AG	AG	AA	GG	AG
contig4155_69	T	C	TT	TT	CT	CT	TT	CT	CT	CT	CT	TT	CT	TT	TT	CT	TT	CT	CT	CT	TT	CT	TT	TT	TT	CT	TT	TT	CT	CT	TT	CT	TT	CT	TT	TT	TT	TT	CT	TT	TT	CT	CT	TT	TT	TT	CT	TT	TT
contig45407_15	T	C	TT	CT	CT	CT	CT	CT	CC	CC	CT	TT	CT	TT	CT	CT	CT	CC	CT	CT	TT	CT	TT	TT	TT	CC	CT	TT	CT	CT	CT	CC	CT	CT	TT	CT	CT	TT	CC	TT	TT	CC	CT	TT	CT	CT	CC	TT	CT
contig466098_70	A	C	CA	CA	AA	AA	CA	AA	AA	AA	AA	CA	AA	CA	CA	AA	CA	AA	AA	AA	CA	AA	CA	CA	CA	AA	CA	CA	AA	AA	CA	AA	CA	AA	CA	CA	CA	CA	AA	CA	CA	AA	AA	CA	CA	CA	AA	CA	CA
contig704380_53	G	A	AG	AG	GG	GG	AG	GG	GG	GG	GG	AG	GG	AG	AG	GG	AG	GG	GG	GG	AG	GG	AG	AG	AG	GG	AG	AG	GG	GG	GG	GG	AG	GG	AG	AG	AG	AG	GG	AG	AG	GG	AG	AG	AG	AG	GG	AG	AG
contig453387_73	G	A	AG	AG	GG	GG	AG	GG	GG	GG	GG	AG	GG	AG	AG	GG	AG	GG	GG	GG	AG	GG	AG	AG	AG	GG	AG	AG	GG	GG	GG	GG	AG	GG	AG	AG	AG	AG	GG	AG	AG	GG	AG	AG	AG	AG	GG	AG	AG
contig609991_89	T	C	CT	CT	TT	TT	CT	TT	TT	TT	TT	CT	TT	CT	TT	TT	CT	TT	TT	TT	CT	TT	CT	CT	CT	TT	TT	CT	TT	TT	TT	TT	CT	TT	CT	CT	CT	CT	TT	CT	CT	TT	CT	CT	CT	CT	TT	CT	CT
contig529693_107	G	T	TG	TG	GG	GG	TG	GG	GG	GG	GG	TG	GG	TG	TG	GG	TG	GG	GG	GG	TG	GG	TG	TG	TG	GG	TG	TG	GG	GG	GG	GG	TG	GG	TG	TG	TG	TG	GG	TG	TG	GG	TG	TG	TG	TG	GG	TG	TG
contig529693_118	G	A	GG	GG	AG	AG	GG	AG	AG	AG	AG	GG	AG	GG	GG	AG	GG	AG	AG	AG	GG	AG	GG	GG	GG	AG	GG	GG	AG	AG	AG	AG	GG	AG	GG	GG	GG	GG	AG	GG	GG	AG	GG	GG	GG	GG	AG	GG	GG
contig45407_102	A	T	AA	TA	AA	AA	TA	AA	TA	AA	AA	AA	AA	AA	TA	AA	TA	TA	AA	AA	AA	AA	AA	AA	AA	TA	TA	AA	AA	AA	TA	TA	TA	AA	AA	TA	TA	AA	TA	AA	AA	AA	AA	AA	TA	AA	AA	AA	TA
contig529693_95	C	T	TC	TC	CC	CC	TC	CC	CC	CC	CC	TC	CC	TC	TC	CC	TC	CC	CC	CC	TC	CC	TC	TC	TC	CC	TC	TC	CC	CC	CC	CC	TC	CC	TC	TC	TC	TC	CC	TC	TC	CC	TC	TC	TC	TC	CC	TC	TC
contig54317_189	G	A	AG	AG	GG	GG	AG	GG	GG	GG	GG	AG	GG	AG	AG	GG	AG	GG	GG	GG	AG	GG	AG	AG	AG	GG	AG	AG	GG	GG	GG	GG	AG	GG	AG	AG	AG	AG	GG	AG	AG	GG	AG	AG	AG	AG	GG	AG	AG
contig54317_38	C	G	CC	CC	GC	GC	CC	GC	GC	GC	GC	CC	GC	CC	CC	GC	CC	GC	GC	GC	CC	GC	CC	CC	CC	GC	CC	CC	GC	GC	GC	GC	CC	GC	CC	CC	CC	CC	GC	CC	CC	GC	CC	CC	CC	GC	GC	CC	CC
contig23471_135	T	A	AT	AT	TT	TT	AT	TT	TT	TT	TT	AT	TT	AT	AT	TT	AT	TT	TT	TT	AT	TT	AT	AT	AT	TT	AT	AT	TT	TT	TT	TT	AT	TT	AT	AT	AT	AT	TT	AT	AT	TT	AT	AT	AT	TT	TT	AT	AT
contig623372_66	C	T	TC	CC	TC	TC	CC	TC	CC	TC	TC	TC	TC	TC	CC	TC	CC	CC	TC	TC	TC	TC	TC	TC	TC	CC	CC	TC	TC	TC	CC	CC	CC	TC	TC	CC	CC	TC	CC	TC	TC	TC	TC	TC	TC	TC	TC	TC	CC
contig4155_23	G	A	AG	GG	AG	AG	GG	AG	GG	AG	AG	AG	AG	AG	GG	AG	GG	GG	AG	AG	AG	AG	AG	AG	AG	GG	GG	AG	AG	AG	GG	GG	GG	AG	AG	GG	GG	AG	GG	AG	AG	AG	AG	AG	GG	AG	AG	AG	AG
contig384135_36	C	T	TC	TC	CC	CC	TC	CC	CC	CC	CC	TC	CC	TC	TC	CC	TC	CC	CC	CC	TC	CC	TC	TC	TC	CC	TC	TC	CC	CC	CC	CC	TC	CC	TC	TC	TC	TC	CC	TC	TC	CC	TC	TC	TC	CC	CC	TC	TC
contig626613_42	G	A	GG	GG	AG	AG	GG	AG	AG	AG	AG	GG	AG	GG	GG	AG	GG	AG	AG	AG	GG	AG	GG	GG	GG	AG	GG	GG	AG	AG	AG	AG	GG	AG	GG	GG	GG	GG	AG	GG	GG	AG	GG	GG	GG	AG	AG	GG	GG
contig643302_42	G	A	AG	AG	GG	GG	AG	GG	GG	GG	GG	AG	GG	AG	AG	GG	AG	GG	GG	GG	AG	GG	AG	AG	AG	GG	AG	AG	GG	GG	GG	GG	AG	GG	AG	AG	AG	AG	GG	AG	AG	GG	AG	AG	AG	GG	GG	AG	AG
contig64089_113	G	A	GG	AG	GG	GG	AG	GG	AG	GG	GG	GG	GG	GG	AG	GG	AG	AG	GG	GG	GG	GG	GG	GG	GG	AG	AG	GG	GG	GG	AG	AG	AG	GG	GG	AG	AG	GG	AG	GG	GG	GG	GG	GG	AG	GG	GG	GG	GG
contig643302_132	G	A	AG	AG	GG	GG	AG	GG	GG	GG	GG	AG	GG	AG	AG	GG	AG	GG	GG	GG	AG	GG	AG	AG	AG	GG	AG	AG	GG	GG	GG	GG	AG	GG	AG	AG	AG	AG	GG	AG	AG	GG	AG	AG	AG	GG	GG	AG	AG
contig23471_151	G	A	AG	GG	AG	AG	GG	AG	GG	AG	AG	AG	AG	AG	GG	AG	GG	GG	AG	AG	AG	AG	AG	AG	AG	GG	GG	AG	AG	AG	GG	GG	GG	AG	AG	GG	GG	AG	GG	AG	AG	AG	AG	AG	GG	AG	AG	AG	AG
contig704380_44	G	A	GG	AG	GG	GG	AG	GG	AG	GG	GG	GG	GG	GG	AG	GG	AG	AG	GG	GG	GG	GG	GG	GG	GG	AG	AG	GG	GG	GG	AG	AG	AG	GG	GG	AG	AG	GG	AG	GG	GG	GG	GG	GG	AG	GG	AG	GG	GG
contig453387_43	C	T	CC	TC	CC	CC	TC	CC	TC	CC	CC	CC	CC	CC	TC	CC	TC	TC	CC	CC	CC	CC	CC	CC	CC	TC	TC	CC	CC	CC	TC	TC	TC	CC	CC	TC	TC	CC	TC	CC	CC	CC	CC	CC	TC	CC	TC	CC	CC
contig80144_85	C	T	TC	CC	TC	TC	CC	TC	CC	TC	TC	TC	TC	TC	CC	TC	CC	CC	TC	TC	TC	TC	TC	TC	TC	CC	CC	TC	TC	TC	CC	CC	CC	TC	TC	CC	CC	TC	CC	TC	TC	TC	TC	TC	TC	TC	CC	TC	TC
contig384135_146	G	A	GG	AG	GG	GG	AG	GG	AG	GG	GG	GG	GG	GG	AG	GG	AG	AG	GG	GG	GG	GG	GG	GG	GG	AG	AG	GG	GG	GG	AG	AG	AG	GG	GG	AG	AG	GG	AG	GG	GG	GG	GG	GG	AG	GG	AG	GG	GG
contig384135_143	G	C	CG	GG	CG	CG	GG	CG	GG	CG	CG	CG	CG	CG	GG	CG	GG	GG	CG	CG	CG	CG	CG	CG	CG	GG	GG	CG	CG	CG	GG	GG	GG	CG	CG	GG	GG	CG	GG	CG	CG	CG	CG	CG	GG	CG	CG	CG	CG
contig23471_35	G	A	GG	AG	GG	GG	AG	GG	AG	GG	GG	GG	GG	GG	AG	GG	AG	AG	GG	GG	GG	GG	GG	GG	GG	AG	AG	GG	GG	GG	AG	AG	AG	GG	GG	AG	AG	GG	AG	GG	GG	GG	GG	GG	AG	GG	AG	GG	GG
contig23471_56	T	G	TT	GT	TT	TT	GT	TT	GT	TT	TT	TT	TT	TT	GT	TT	GT	GT	TT	TT	TT	TT	TT	TT	TT	GT	GT	TT	TT	TT	GT	GT	GT	TT	TT	GT	GT	TT	GT	TT	TT	TT	TT	TT	GT	TT	GT	TT	TT
contig970314_50	C	T	CC	TC	CC	CC	TC	CC	TC	CC	CC	CC	CC	CC	TC	CC	TC	TC	CC	CC	CC	CC	CC	CC	CC	TC	TC	CC	CC	CC	TC	TC	TC	CC	CC	TC	TC	CC	TC	CC	CC	CC	CC	CC	TC	CC	TC	CC	CC
contig23471_58	A	C	CA	AA	CA	CA	AA	CA	AA	CA	CA	CA	CA	CA	AA	CA	AA	AA	CA	CA	CA	CA	CA	CA	CA	AA	AA	CA	CA	CA	AA	AA	AA	CA	CA	AA	AA	CA	AA	CA	CA	CA	CA	CA	AA	CA	CA	CA	CA
contig529693_146	A	C	AA	CA	AA	AA	CA	AA	CA	AA	AA	AA	AA	AA	CA	AA	CA	CA	AA	AA	AA	AA	AA	AA	AA	CA	CA	AA	AA	AA	CA	CA	CA	AA	AA	CA	CA	AA	CA	AA	AA	AA	AA	AA	CA	AA	CA	AA	AA
contig368540_133	G	A	AG	GG	AG	AG	GG	AG	GG	AG	AG	AG	AG	AG	GG	AG	GG	GG	AG	AG	AG	AG	AG	AG	AG	GG	GG	AG	AG	AG	GG	GG	GG	AG	AG	GG	GG	AG	GG	AG	AG	AG	AG	AG	AG	AG	GG	AG	AG
contig368540_87	C	T	CC	TC	CC	CC	TC	CC	TC	CC	CC	CC	CC	CC	TC	CC	TC	TC	CC	CC	CC	CC	CC	CC	CC	TC	TC	CC	CC	CC	TC	TC	TC	CC	CC	TC	TC	CC	TC	CC	CC	CC	CC	CC	CC	CC	TC	CC	CC
contig1281_16	G	T	GG	TG	TG	TG	TG	GG	TG	GG	GG	GG	TG	GG	TG	TG	TG	TT	TG	TG	GG	TG	GG	GG	GG	TT	TT	GG	TG	GG	TT	TT	TG	TG	GG	TG	GG	GG	TT	GG	GG	TG	GG	GG	GG	TG	TG	GG	GG
contig230345_172	C	A	CC	AC	AC	AC	AC	AC	AC	AC	CC	CC	AC	CC	CC	AC	AC	AA	AC	AC	CC	AC	CC	CC	CC	AA	CC	CC	AC	AC	AA	AA	AC	AC	CC	AC	CC	CC	AA	CC	CC	AC	CC	CC	CC	AC	AC	CC	CC
contig230345_7	G	A	AG	GG	AG	AG	GG	AG	GG	AG	AG	AG	AG	AG	AG	AG	GG	GG	AG	AG	AG	AG	AG	AG	AG	GG	AG	AG	AG	AG	GG	GG	GG	AG	AG	GG	AG	AG	GG	AG	AG	AG	AG	AG	AG	AG	AG	AG	AG
contig23166_7	G	A	AA	GG	AG	AG	AG	AG	AG	AG	AG	AA	AG	AA	AA	AG	AG	GG	AG	AG	AA	AG	AA	AA	AA	GG	AA	AA	AG	AG	GG	GG	AG	AG	AA	GG	AA	AA	GG	AA	AA	AG	AA	AA	AA	AG	AG	AA	AA
contig31388_96	T	A	AT	AT	TT	TT	AT	TT	AT	TT	TT	AT	TT	AT	AT	TT	AT	TT	TT	TT	AT	TT	AT	AT	AT	TT	AT	AT	TT	TT	TT	TT	AT	TT	AT	AT	AT	AT	TT	AT	AT	TT	AT	AT	AT	TT	TT	AT	AT
contig31388_215	A	T	TA	TA	AA	AA	TA	AA	TA	AA	AA	TA	AA	TA	TA	AA	TA	AA	AA	AA	TA	AA	TA	TA	TA	AA	TA	TA	AA	AA	AA	AA	TA	AA	TA	TA	TA	TA	AA	TA	TA	AA	TA	TA	TA	AA	AA	TA	TA
contig31388_112	C	G	GC	GC	CC	CC	GC	CC	GC	CC	CC	GC	CC	GC	GC	CC	GC	CC	CC	CC	GC	CC	GC	GC	GC	CC	GC	GC	CC	CC	CC	CC	GC	CC	GC	GC	GC	GC	CC	GC	GC	CC	GC	GC	GC	CC	CC	GC	GC
contig31388_231	C	A	AC	AC	CC	CC	AC	CC	AC	CC	CC	AC	CC	AC	AC	CC	AC	CC	CC	CC	AC	CC	AC	AC	AC	CC	AC	AC	CC	CC	CC	CC	AC	CC	AC	AC	AC	AC	CC	AC	AC	CC	AC	AC	AC	CC	CC	AC	AC
contig31388_109	A	T	TA	TA	AA	AA	TA	AA	TA	AA	AA	TA	AA	TA	TA	AA	TA	AA	AA	AA	TA	AA	TA	TA	TA	AA	TA	TA	AA	AA	AA	AA	TA	AA	TA	TA	TA	TA	AA	TA	TA	AA	TA	TA	TA	AA	AA	TA	TA
contig230345_159	A	T	TA	AA	TA	TA	AA	TA	AA	TA	TA	TA	TA	TA	TA	TA	AA	AA	TA	TA	TA	TA	TA	TA	TA	AA	TA	TA	TA	TA	AA	AA	AA	TA	TA	AA	TA	TA	AA	TA	TA	TA	TA	TA	TA	AA	TA	TA	TA
contig31388_213	G	C	GG	CG	CG	CG	GG	CG	CG	CG	CG	GG	CG	GG	GG	CG	GG	CC	CG	CG	GG	CG	GG	GG	GG	CG	GG	GG	CG	CG	CC	CC	CG	CG	GG	CG	GG	GG	CC	GG	GG	CG	GG	GG	GG	GG	CG	GG	GG
contig31388_171	G	A	AG	AG	GG	GG	AG	GG	AG	GG	GG	AG	GG	AG	AG	GG	AG	GG	GG	GG	AG	GG	AG	AG	AG	GG	AG	AG	GG	GG	GG	GG	AG	GG	AG	AG	AG	AG	GG	AG	AG	GG	AG	AG	AG	GG	GG	AG	AG
contig31388_207	C	T	CC	TC	TC	TC	CC	TC	TC	TC	TC	CC	TC	CC	CC	TC	CC	TT	TC	TC	CC	TC	CC	CC	CC	TC	CC	CC	TC	TC	TT	TT	TC	TC	CC	TC	CC	CC	TT	CC	CC	TC	CC	CC	CC	CC	TC	CC	CC
contig31388_82	A	T	AA	TA	TA	TA	AA	TA	TA	TA	TA	AA	TA	AA	AA	TA	AA	TT	TA	TA	AA	TA	AA	AA	AA	TA	AA	AA	TA	TA	TT	TT	TA	TA	AA	TA	AA	AA	TT	AA	AA	TA	AA	AA	AA	AA	TA	AA	AA
contig31388_184	A	G	AA	GA	GA	GA	AA	GA	GA	GA	GA	AA	GA	AA	AA	GA	AA	GG	GA	GA	AA	GA	AA	AA	AA	GA	AA	AA	GA	GA	GG	GG	GA	GA	AA	GA	AA	AA	GG	AA	AA	GA	AA	AA	AA	AA	GA	AA	AA
contig31388_61	T	C	CT	TT	CT	CT	CT	CT	TT	CT	CT	CT	CT	CT	CT	CT	TT	TT	CT	CT	CT	CT	CT	CT	CT	CT	CT	CT	CT	CT	TT	TT	TT	CT	CT	TT	CT	CT	TT	CT	CT	CT	CT	CT	CT	TT	CT	CT	CT
contig31388_214	T	C	TT	CT	CT	CT	TT	CT	CT	CT	CT	TT	CT	TT	TT	CT	TT	CC	CT	CT	TT	CT	TT	TT	TT	CT	TT	TT	CT	CT	CC	CC	CT	CT	TT	CT	TT	TT	CC	TT	TT	CT	TT	TT	TT	TT	CT	TT	TT
contig31388_34	T	C	CT	TT	CT	CT	CT	CT	TT	CT	CT	CT	CT	CT	CT	CT	TT	TT	CT	CT	CT	CT	CT	CT	CT	CT	CT	CT	CT	CT	TT	TT	TT	CT	CT	TT	CT	CT	TT	CT	CT	CT	CT	CT	CT	TT	CT	CT	CT
contig31388_195	C	A	CC	AC	AC	AC	CC	AC	AC	AC	AC	CC	AC	CC	CC	AC	CC	AA	AC	AC	CC	AC	CC	CC	CC	AC	CC	CC	AC	AC	AA	AA	AC	AC	CC	AC	CC	CC	AA	CC	CC	AC	CC	CC	CC	AC	AC	CC	CC
contig710332_108	T	C	CT	TT	CC	CT	CT	CT	TT	CT	CT	CT	CT	CT	CT	CT	TT	TT	CC	CT	CT	CT	CT	CT	CT	CT	CT	CT	CT	CT	CT	TT	TT	CT	CT	TT	CT	CT	TT	CT	CT	CT	CT	CT	CT	CC	CT	CT	CT
contig710332_33	C	T	TC	TC	CC	CC	TC	CC	TC	CC	CC	TC	CC	TC	TC	CC	TC	CC	CC	CC	TC	CC	TC	TC	TC	CC	TC	TC	CC	CC	CC	CC	TC	CC	TC	TC	TC	TC	CC	TC	TC	CC	TC	TC	TC	TC	CC	TC	TC
contig710332_125	G	T	GG	TG	TG	TG	GG	TG	TG	TG	TG	GG	TG	GG	GG	TG	TG	TT	TG	TG	GG	TG	GG	GG	GG	TG	GG	GG	TG	TG	TG	TT	TG	TG	GG	TG	GG	GG	TT	GG	GG	TG	GG	GG	GG	TG	TG	GG	GG
contig9337_93	A	C	CC	CA	CA	CA	CC	CA	CA	CA	CA	CC	CA	CC	CC	CA	CA	AA	CA	CA	CC	CA	CC	CC	CC	CA	CC	CC	CA	CA	CA	AA	CA	CA	CC	CA	CC	CC	AA	CA	CC	CA	CC	CC	CC	CA	CA	CA	CC
contig60386_86	G	T	GG	GG	TG	TG	GG	TG	TG	TG	TG	GG	TG	GG	GG	TG	GG	TT	TG	TG	GG	TG	GG	GG	GG	TG	GG	GG	TG	TG	TG	TT	GG	TG	GG	TG	GG	GG	TG	TG	GG	TG	GG	GG	GG	TG	TG	TG	GG
contig60386_4	C	T	CC	CC	TC	TC	CC	TC	TC	TC	TC	CC	TC	CC	CC	TC	CC	TT	TC	TC	CC	TC	CC	CC	CC	TC	CC	CC	TC	TC	TC	TT	CC	TC	CC	TC	CC	CC	TC	TC	CC	TC	CC	CC	CC	TC	TC	TC	CC
contig429527_14	G	A	AG	AG	AG	AG	AG	AG	GG	AG	AG	AG	AG	AG	AG	AG	AG	GG	AG	AG	AG	AG	AG	AG	AG	AG	AG	AG	AG	AG	AG	GG	AG	AG	AG	GG	AG	AG	AG	AG	AG	AG	AG	AG	AG	AG	AG	AG	AG
contig282489_23	T	C	CT	CT	TT	TT	CT	TT	CT	TT	TT	CT	TT	CT	CT	TT	CT	TT	TT	TT	CT	TT	CT	CT	CT	TT	CT	CT	TT	TT	TT	TT	CT	TT	CT	CT	CT	CT	TT	TT	CT	TT	CT	CT	CT	CT	TT	CT	CT
contig8389_62	T	C	CC	CC	TT	TT	CC	TT	CT	TT	TT	CC	TT	CC	CC	TT	CC	TT	TT	TT	CC	TT	CC	CC	CC	TT	CC	CC	TT	TT	TT	TT	CC	TT	CC	CT	CC	CC	TT	TT	CC	TT	CC	CC	CC	CT	TT	CT	CC
contig599016_125	T	C	CT	CT	TT	TT	CT	TT	CT	TT	TT	CT	TT	CT	CT	TT	CT	TT	TT	TT	CT	TT	CT	CT	CT	TT	CT	CT	TT	TT	TT	TT	CT	TT	CT	CT	CT	CT	TT	TT	CT	TT	CT	CT	CT	CT	TT	CT	CT
contig397517_20	C	A	AC	AC	AC	AC	AC	AC	CC	AC	AC	AC	AC	AC	AC	AC	AC	CC	AC	AC	AC	AC	AC	AC	AC	AC	AC	AC	AC	AC	AC	CC	AC	AC	AC	CC	AC	AC	AC	AC	AC	AC	AC	AC	AC	AC	AC	AC	AC
contig72139_31	T	A	TT	TT	AT	AT	TT	AT	AT	AT	AT	TT	AT	TT	TT	AT	TT	AA	AT	AT	TT	AT	TT	TT	TT	AT	TT	TT	AT	AT	AT	AA	TT	AT	TT	TT	TT	TT	AT	AT	TT	AT	TT	TT	TT	TT	AT	AT	TT
contig282489_33	A	G	GA	GA	AA	AA	GA	AA	GA	AA	AA	GA	AA	GA	GA	AA	GA	AA	AA	AA	GA	AA	GA	GA	GA	AA	GA	GA	AA	AA	AA	AA	GA	AA	GA	GA	GA	GA	AA	AA	GA	AA	GA	GA	GA	GA	AA	GA	GA
contig72139_18	C	T	TC	TC	CC	CC	TC	CC	TC	CC	CC	TC	CC	TC	TC	CC	TC	CC	CC	CC	TC	CC	TC	TC	TC	CC	TC	TC	CC	CC	CC	CC	TC	CC	TC	TC	TC	TC	CC	CC	TC	CC	TC	TC	TC	TC	CC	TC	TC
contig9785_200	G	T	GG	GG	TG	TG	GG	TG	TG	TG	TG	GG	TG	GG	GG	TG	GG	TT	TG	TG	GG	TG	GG	GG	GG	TG	GG	GG	TG	TG	TG	TT	GG	TG	GG	GG	GG	GG	TT	TG	GG	TG	GG	GG	GG	GG	TG	TG	GG
contig9785_196	T	G	TT	TT	GT	GT	TT	GT	GT	GT	GT	TT	GT	TT	TT	GT	TT	GG	GT	GT	TT	GT	TT	TT	TT	GT	TT	TT	GT	GT	GT	GG	TT	GT	TT	TT	TT	TT	GT	GT	TT	GT	TT	TT	TT	TT	GT	GT	TT
contig72139_4	G	T	TG	TG	TG	TG	TG	TG	GG	TG	TG	TG	TG	TG	TG	TG	TG	GG	TG	TG	TG	TG	TG	TG	TG	TG	TG	TG	TG	TG	TG	GG	TG	TG	TG	TG	TG	TG	TG	TG	TG	TG	TG	TG	TG	TG	TG	GG	TG
contig9785_237	T	A	TT	TT	AT	AT	TT	AT	AT	AT	AT	TT	AT	TT	TT	AT	TT	AA	AT	AT	TT	AT	TT	TT	TT	AT	TT	TT	AT	AT	AT	AA	TT	AT	TT	TT	TT	TT	AA	AT	TT	AT	TT	TT	TT	TT	AT	AT	TT
contig9785_236	T	C	TT	TT	CT	CT	TT	CT	CT	CT	CT	TT	CT	TT	TT	CT	TT	CC	CT	CT	TT	CT	TT	TT	TT	CT	TT	TT	CT	CT	CT	CC	TT	CT	TT	TT	TT	TT	CT	CT	TT	CT	TT	TT	TT	TT	CT	CT	TT
contig54278_54	T	A	AT	AT	AA	AA	AT	AA	AT	AA	AA	AT	AA	AT	AT	AA	AT	TT	AA	AA	AT	AA	AT	AT	AT	AA	AT	AT	AA	AA	AA	AA	AT	AA	AT	AT	AT	AT	AA	AA	AT	AA	AT	AT	AT	AT	AA	AT	AT
contig53915_233	G	A	AG	AG	AG	AG	AG	AG	AG	AG	AG	AG	AG	AG	AG	AG	AG	GG	AG	AG	AG	AG	AG	AG	AG	AG	AG	AG	AG	AG	AG	AG	AG	AG	AG	AG	AG	AG	AG	AG	AG	AG	AG	AG	AG	AA	AG	GG	AG
contig53915_100	G	A	AG	AG	AG	AG	AG	AG	AG	AG	AG	AG	AG	AG	AG	AG	AG	GG	AG	AG	AG	AG	AG	AG	AG	AG	AG	AG	AG	AG	AG	AG	AG	AG	AG	AG	AG	AG	AG	AG	AG	AG	AG	AG	AG	AA	AG	GG	AG
contig19277_40	A	T	TA	TA	AA	AA	TA	AA	TA	AA	AA	TA	AA	TA	TA	AA	TA	AA	AA	AA	TA	AA	TA	TA	TA	AA	TA	TA	AA	AA	AA	AA	TA	AA	TA	TA	TA	TA	AA	AA	TA	AA	TA	TA	TA	TA	AA	TA	TA
contig19277_66	G	T	GG	GG	TG	TG	GG	TG	GG	TG	TG	GG	TG	GG	GG	TG	GG	TT	TG	TG	GG	TG	GG	GG	GG	TG	GG	GG	TG	TG	TG	TG	GG	TG	GG	GG	GG	GG	TG	TG	GG	TG	GG	GG	GG	GG	TG	GG	GG
contig599016_54	T	G	TT	TT	GT	GT	TT	GT	TT	GT	GT	TT	GT	TT	TT	GT	TT	GG	GT	GT	TT	GT	TT	TT	TT	GT	TT	TT	GT	GT	GT	GT	TT	GT	TT	TT	TT	TT	GT	GT	TT	GT	TT	TT	TT	TT	GT	TT	TT
contig53915_40	A	G	AA	AA	GA	GA	AA	GA	AA	GA	GA	AA	GA	AA	AA	GA	AA	GG	GA	GA	AA	GA	AA	AA	AA	GA	AA	AA	GA	GA	GA	GA	AA	GA	AA	AA	AA	AA	GA	GA	AA	GA	AA	AA	AA	GG	GA	AA	AA
contig287102_100	A	G	AA	AA	GA	GA	AA	GA	AA	GA	GA	AA	GA	AA	AA	GA	AA	GG	GA	GA	AA	GA	AA	AA	AA	GA	AA	AA	GA	GA	GA	GA	AA	GA	AA	AA	AA	AA	GA	GA	AA	GA	AA	AA	AA	AA	GA	GA	AA
contig29079_144	A	C	AA	AA	CA	CA	AA	CA	AA	CA	CA	AA	CA	AA	AA	CA	AA	CC	CA	CA	AA	CA	AA	AA	AA	CA	AA	AA	CA	CA	CA	CA	AA	CA	AA	AA	AA	AA	CA	CA	AA	CA	AA	AA	AA	CC	CA	AA	AA
contig28409_25	A	C	CA	CA	CA	CA	CA	CA	CA	CA	CA	CA	CA	CA	CA	CA	CA	CA	CA	CA	CA	CA	CA	CA	CA	CA	CA	CA	CA	CA	CA	CA	CA	CA	CA	CA	CA	CA	CA	CA	CA	CA	CA	CA	CA	CA	CA	CA	CA
contig29079_29	G	C	CG	CG	GG	GG	CG	GG	CG	GG	GG	CG	GG	CG	CG	GG	CG	GG	GG	GG	CG	GG	CG	CG	CG	GG	CG	CG	GG	GG	GG	GG	CG	GG	CG	CG	CG	CG	GG	GG	CG	GG	CG	CG	CG	GG	GG	GG	CG
contig1695_92	T	C	TT	TT	CT	CT	TT	CT	TT	CT	CT	TT	CT	TT	TT	CT	TT	CT	CT	CT	TT	CT	TT	TT	TT	CT	TT	TT	CT	CT	CT	CT	TT	CT	TT	TT	TT	TT	CT	CT	TT	CT	TT	TT	TT	CC	CT	CT	TT
contig13101_126	C	A	CC	CC	AC	AC	CC	AC	CC	AC	AC	CC	AC	CC	CC	AC	CC	AC	AC	AC	CC	AC	CC	CC	CC	AC	CC	CC	AC	AC	AC	AC	CC	AC	CC	CC	CC	CC	AC	AC	CC	AC	CC	CC	CC	AA	AC	AC	CC
contig29079_71	T	A	TT	TT	AT	AT	TT	AT	TT	AT	AT	TT	AT	TT	TT	AT	TT	AT	AT	AT	TT	AT	TT	TT	TT	AT	TT	TT	AT	AT	AT	AT	TT	AT	TT	TT	TT	TT	AT	AT	TT	AT	TT	TT	TT	AA	AT	TT	TT
contig13101_65	C	T	TC	TC	CC	CC	TC	CC	TC	CC	CC	TC	CC	TC	TC	CC	TC	CC	CC	CC	TC	CC	TC	TC	TC	CC	TC	TC	CC	CC	CC	CC	TC	CC	TC	TC	TC	TC	CC	CC	TC	CC	TC	TC	TC	CC	CC	CC	TC
contig29079_16	T	C	CT	CT	TT	TT	CT	TT	CT	TT	TT	CT	TT	CT	CT	TT	CT	TT	TT	TT	CT	TT	CT	CT	CT	TT	CT	CT	TT	TT	TT	TT	CT	TT	CT	CT	CT	CT	TT	TT	CT	TT	CT	CT	CT	TT	TT	TT	CT
contig29079_216	G	A	AG	AG	GG	GG	AG	GG	AG	GG	GG	AG	GG	AG	AG	GG	AG	GG	GG	GG	AG	GG	AG	AG	AG	GG	AG	AG	GG	GG	GG	GG	AG	GG	AG	AG	AG	AG	GG	GG	AG	GG	AG	AG	AG	GG	GG	GG	AG
contig13101_36	T	C	TT	TT	CT	CT	TT	CT	TT	CT	CT	TT	CT	TT	TT	CT	TT	CT	CT	CT	TT	CT	TT	TT	TT	CT	TT	TT	CT	CT	CT	CT	TT	CT	TT	TT	TT	TT	CT	CT	TT	CC	TT	TT	TT	TT	CT	TT	TT
contig29079_195	C	T	CC	CC	TC	TC	CC	TC	CC	TC	TC	CC	TC	CC	CC	TC	CC	TC	TC	TC	CC	TC	CC	CC	CC	TC	CC	CC	TC	TC	TC	TC	CC	TC	CC	CC	CC	CC	TC	TC	CC	TC	CC	CC	CC	TC	TC	TC	CC
contig1695_17	C	T	TT	TC	TC	TC	TC	TC	TC	TC	TC	TC	TC	TC	TC	TC	TC	TC	TC	TC	TC	TC	TC	TC	TC	TC	TC	TC	TC	TC	TC	TC	TC	TC	TC	TC	TC	TC	TC	TC	TC	TC	TC	TC	TC	CC	TC	CC	TC
contig827797_134	A	T	TA	TA	AA	AA	TA	AA	TA	AA	AA	TA	AA	TA	TA	AA	TA	AA	AA	TA	TA	AA	TA	TA	TA	AA	TA	TA	AA	AA	AA	AA	TA	AA	TA	TA	TA	TA	AA	AA	TA	AA	TA	TA	TA	TA	AA	AA	TA
contig671996_66	C	T	TC	TC	CC	CC	TC	CC	TC	CC	CC	TC	CC	TC	TC	CC	TC	CC	CC	TC	TC	CC	TC	TC	TC	CC	TC	TC	CC	CC	CC	CC	TC	CC	TC	TC	TC	TC	CC	CC	TC	CC	TC	TC	TC	CC	CC	CC	TC
contig51335_68	A	C	CA	CA	AA	AA	CA	AA	CA	AA	AA	CA	AA	CA	CA	AA	CA	AA	AA	CA	CA	AA	CA	CA	CA	AA	CA	CA	AA	AA	AA	AA	CA	AA	CA	CA	CA	CA	AA	AA	CA	AA	CA	CA	CA	CA	AA	AA	CA
contig57708_108	G	A	GG	GG	AG	AG	GG	AG	GG	AG	AG	GG	AG	GG	GG	AG	GG	AG	AG	GG	GG	AG	GG	GG	GG	AG	GG	GG	AG	AG	AG	AG	GG	AG	GG	GG	GG	GG	AG	AG	GG	AG	GG	GG	GG	AG	AG	AG	GG
contig57708_163	A	C	AA	AA	CA	CA	AA	CA	AA	CA	CA	AA	CA	AA	AA	CA	AA	CA	CA	AA	AA	CA	AA	AA	AA	CA	AA	AA	CA	CA	CA	CA	AA	CA	AA	AA	AA	AA	CA	CA	AA	CA	AA	AA	AA	CA	CA	CA	AA
contig29079_186	G	A	AG	AG	AG	AG	AG	AG	AG	AG	AG	AG	AG	AG	AG	AG	AG	AG	AG	AG	AG	AG	AG	AG	AG	AG	AG	AG	AG	AG	AG	AG	AG	AG	AG	AG	AG	AG	AG	AG	AG	AG	AG	AG	AG	GG	GG	GG	AG
contig671996_86	G	A	AG	AG	AG	AG	AG	AG	AG	AG	AG	AG	AG	AG	AG	AG	AG	AG	AG	AG	AG	AG	AG	AG	AG	AG	AG	AG	AG	AG	AG	AG	AG	AG	AG	AG	AG	AG	AG	AG	AG	AG	AG	AG	AG	GG	AG	AG	AG
contig287415_13	C	T	TC	TC	TT	TC	TC	TC	TC	TC	TC	TC	TT	TC	TC	TC	TC	TC	TC	TC	TC	TT	TC	TC	TC	TC	TC	TC	TC	TC	TC	CC	TC	TC	TC	TC	TC	TC	TC	CC	TC	TT	TC	TC	TC	TT	CC	TT	TC
contig287415_116	A	G	GA	GA	GG	GA	GA	GA	GA	GA	GA	GA	GG	GA	GA	GA	GA	GA	GA	GA	GA	GG	GA	GA	GA	GA	GA	GA	GA	GA	GA	AA	GA	GA	GA	GA	GA	GA	GA	AA	GA	GG	GA	GA	GA	GG	AA	GG	GA
contig287415_100	C	T	TC	TC	CC	CC	TC	CC	TC	CC	CC	TC	CC	TC	TC	CC	TC	CC	CC	TC	TC	CC	TC	TC	TC	CC	TC	TC	CC	CC	CC	CC	TC	CC	TC	TC	TC	TC	CC	CC	TC	CC	TC	TC	TC	CC	CC	TC	TC
contig53935_68	G	A	GG	GG	AG	AG	GG	AG	GG	AG	AG	GG	AG	GG	GG	AG	GG	AG	AG	GG	GG	AG	GG	GG	GG	AG	GG	GG	AG	AG	AG	AG	GG	AG	GG	GG	GG	GG	AG	AG	GG	AG	GG	GG	GG	AG	AG	AG	GG
contig22171_115	T	C	CT	CT	CT	CT	CT	CT	CT	CT	CT	CT	CT	CT	CT	CT	CT	CT	CT	CT	CT	CT	CT	CT	CT	CT	CT	CT	CT	CT	CT	CT	CT	CT	CT	CT	CT	CT	CT	CT	CT	CT	CT	CT	CT	TT	CT	CT	CT
contig42978_208	A	T	AA	AA	TA	TA	AA	TA	AA	TA	TA	AA	TA	AA	AA	TA	AA	TA	TA	AA	AA	TA	AA	AA	AA	TA	AA	AA	TA	AA	TA	TA	AA	TA	AA	AA	AA	AA	TA	TA	AA	TA	AA	AA	AA	TA	TA	AA	AA
contig287415_94	C	T	CC	CC	TC	TC	CC	TC	CC	TC	TC	CC	TC	CC	CC	TC	CC	TC	TC	CC	CC	CC	CC	CC	CC	TC	CC	CC	TC	TC	TC	TT	CC	TC	CC	CC	CC	CC	TC	TT	CC	CC	CC	CC	CC	TC	TT	CC	CC
contig287415_88	A	G	AA	AA	GA	GA	AA	GA	AA	GA	GA	AA	GA	AA	AA	GA	AA	GA	GA	AA	AA	AA	AA	AA	AA	GA	AA	AA	GA	GA	GA	GG	AA	GA	AA	AA	AA	AA	GA	GG	AA	AA	AA	AA	AA	GA	GG	AA	AA
contig29802_80	C	T	TC	TC	TC	TC	TC	TC	TC	TC	TC	TC	TC	TC	TC	TC	TC	TC	TC	TC	TC	TC	TC	TC	TC	TC	TC	TC	TC	TC	TC	TC	TC	TC	TC	TC	TC	TC	TC	TC	TC	TC	TC	TC	TC	TC	TC	TC	TC
contig22171_178	T	C	CT	CT	CT	CT	CT	CT	CT	CT	CT	CT	CT	CT	CT	CT	CT	CT	CT	CT	CT	CT	CT	CT	CT	CT	CT	CT	CT	CT	CT	CT	CT	CT	CT	CT	CT	CT	CT	CT	CT	CT	CT	CT	CT	CT	CT	CT	CT
contig23315_135	G	C	CG	CG	CG	CG	CG	CG	CG	CG	CG	CG	CG	CG	CG	CG	CG	CG	CG	CG	CG	CG	CG	CG	CG	CG	CG	CG	CG	CG	CG	CG	CG	CG	CG	CG	CG	CG	CG	CG	CG	CG	CG	CG	CG	CG	CG	CG	CG
contig51335_129	C	A	CC	CC	AC	AC	CC	AC	CC	AC	AC	CC	AC	CC	CC	AC	CC	AC	AC	CC	CC	AC	CC	CC	CC	AC	CC	CC	AC	AC	AC	AC	CC	AC	CC	CC	CC	CC	AC	AC	CC	AC	CC	CC	CC	CC	AC	CC	CC
contig22171_211	C	T	TC	TC	TC	TC	TC	TC	TC	TC	TC	TC	TC	TC	TC	TC	TC	TC	TC	TC	TC	TC	TC	TC	TC	TC	TC	TC	TC	TC	TC	TC	TC	TC	TC	TC	TC	TC	TC	TC	TC	TC	TC	TC	TC	TC	TC	TC	TC
contig29802_122	A	G	GA	GA	AA	AA	GA	AA	GA	AA	AA	GA	AA	GA	GA	AA	GA	AA	AA	GA	GA	AA	GA	GA	GA	AA	GA	GA	AA	AA	AA	AA	GA	AA	GA	GA	GA	GA	AA	AA	GA	AA	GA	GA	GA	AA	AA	AA	GA
contig55055_3	A	C	CA	CA	CA	CA	CA	CA	CA	CA	CA	CA	CA	CA	CA	CA	CA	CA	CA	CA	CA	CA	CA	CA	CA	CA	CA	CA	CA	CA	CA	CA	CA	CA	CA	CA	CA	CA	CA	CA	CA	CA	CA	CA	CA	CA	CA	CA	CA
contig55055_98	G	A	AG	AG	AG	AG	AG	AG	AG	AG	AG	AG	AG	AG	AG	AG	AG	AG	AG	AG	AG	AG	AG	AG	AG	AG	AG	AG	AG	AG	AG	AG	AG	AG	AG	AG	AG	AG	AG	AG	AG	AG	AG	AG	AG	AG	AG	AG	AG
contig42978_226	C	T	TC	TC	TC	TC	TC	TC	TC	TC	TC	TC	TC	TC	TC	TC	TC	TC	TC	TC	TC	TC	TC	TC	TC	TC	TC	TC	TC	TC	TC	TC	TC	TC	TC	TC	TC	TC	TC	TC	TC	TC	TC	TC	TC	TC	TC	TC	TC
contig46807_14	G	A	AG	AG	GG	GG	AG	GG	AG	GG	GG	AG	GG	AG	AG	GG	AG	GG	GG	AG	AG	GG	AG	AG	AG	GG	AG	AG	GG	GG	GG	GG	AG	GG	AG	AG	AG	AG	GG	GG	AG	GG	AG	AG	AG	GG	GG	GG	AG
contig46807_67	T	A	TT	TT	AT	AT	TT	AT	TT	AT	AT	TT	AT	TT	TT	AT	TT	AT	AT	TT	TT	AT	TT	TT	TT	AT	TT	TT	AT	AT	AT	AT	TT	AT	TT	TT	TT	TT	AT	AT	TT	AT	TT	TT	TT	TT	AT	AT	TT
contig46807_118	T	C	TT	TT	CT	CT	TT	CT	TT	CT	CT	TT	CT	TT	TT	CT	TT	CT	CT	TT	TT	CT	TT	TT	TT	CT	TT	TT	CT	CT	CT	CT	TT	CT	TT	TT	TT	TT	CT	CT	TT	CT	TT	TT	TT	TT	CT	CT	TT
contig29802_99	T	G	GT	GT	TT	TT	GT	TT	GT	TT	TT	GT	TT	GT	GT	TT	GT	TT	TT	GT	GT	TT	GT	GT	GT	TT	GT	GT	TT	TT	TT	TT	GT	TT	GT	GT	GT	GT	TT	TT	GT	TT	GT	GT	GT	TT	TT	TT	GT
contig14998_74	A	G	AA	AA	GA	GA	AA	GA	AA	GA	GA	AA	GA	AA	AA	GA	AA	GA	GA	AA	AA	GA	AA	AA	AA	GA	AA	AA	GA	GA	GA	GA	AA	GA	AA	AA	AA	AA	GA	GA	AA	GA	AA	AA	AA	GA	GA	GA	AA
contig22171_35	C	T	CC	CC	TC	TC	CC	TC	CC	TC	TC	CC	TC	CC	CC	TC	CC	TC	TC	CC	CC	TC	CC	CC	CC	TC	CC	CC	TC	TC	TC	TC	CC	TC	CC	CC	CC	CC	TC	TC	CC	TC	CC	CC	CC	TC	TC	TC	CC
contig22171_34	T	C	TT	TT	CT	CT	TT	CT	TT	CT	CT	TT	CT	TT	TT	CT	TT	CT	CT	TT	TT	CT	TT	TT	TT	CT	TT	TT	CT	CT	CT	CT	TT	CT	TT	TT	TT	TT	CT	CT	TT	CT	TT	TT	TT	CT	CT	CT	TT
contig29802_16	A	T	AA	AA	TA	TA	AA	TA	AA	TA	TA	AA	TA	AA	AA	TA	AA	TA	TA	AA	AA	TA	AA	AA	AA	TA	AA	AA	TA	TA	TA	TA	AA	TA	AA	AA	AA	AA	TA	TA	AA	TA	AA	AA	AA	TA	TA	TA	AA
contig22171_30	C	T	CC	CC	TC	TC	CC	TC	CC	TC	TC	CC	TC	CC	CC	TC	CC	TC	TC	CC	CC	TC	CC	CC	CC	TC	CC	CC	TC	TC	TC	TC	CC	TC	CC	CC	CC	CC	TC	TC	CC	TC	CC	CC	CC	TC	TC	TC	CC
contig22171_58	C	G	GC	GC	CC	CC	GC	CC	GC	CC	CC	GC	CC	GC	CC	CC	GC	CC	CC	GC	GC	CC	GC	GC	GC	CC	GC	GC	CC	CC	CC	CC	GC	CC	GC	GC	GC	GC	CC	CC	GC	CC	GC	GC	GC	GG	CC	CC	GC
contig3107_78	A	G	GG	GG	GA	GA	GG	GA	GG	GA	GA	GG	GA	GG	GG	GA	GG	GA	GA	GG	GG	GA	GG	GG	GG	GA	GG	GG	GA	GA	GA	GA	GG	GA	GG	GG	GG	GG	GA	GA	GG	GA	GG	GG	GG	AA	GA	GA	GG
contig3107_242	C	T	TT	TT	TC	TC	TT	TC	TT	TC	TC	TT	TC	TT	TT	TC	TT	TC	TC	TT	TT	TC	TT	TT	TT	TC	TT	TT	TC	TC	TC	TC	TT	TC	TT	TT	TT	TT	TC	TC	TT	TC	TT	TT	TT	CC	TC	TC	TT
contig23217_60	T	A	AT	TT	TT	TT	AT	AT	AT	AT	AT	TT	TT	AT	AT	TT	AT	TT	AT	TT	TT	AT	TT	AT	TT	AT	AT	AT	AT	TT	AT	AT	AT	AT	AT	AT	AT	TT	TT	TT	AT	AT	AT	TT	AT	AT	AT	AT	TT
contig23217_67	C	T	TC	CC	CC	CC	TC	TC	TC	TC	TC	CC	CC	TC	TC	CC	TC	CC	TC	CC	CC	TC	CC	TC	CC	TC	TC	TC	TC	CC	TC	TC	TC	TC	TC	TC	TC	CC	CC	CC	TC	TC	TC	CC	TC	TC	TC	TC	CC
contig634757_111	A	G	GA	AA	GA	GA	AA	GA	GA	GA	AA	GA	AA	GA	GA	GA	GA	AA	GA	GA	AA	GA	GA	GA	GA	GA	AA	AA	AA	AA	GA	GA	GA	AA	GA	AA	GA	GA	GA	GA	GA	AA	GA	AA	GA	GA	GA	GA	GA
contig550405_14	A	T	TA	AA	AA	AA	TA	TA	TA	TA	TA	AA	AA	TA	TA	AA	TA	AA	TA	AA	AA	TA	AA	TA	AA	TA	TA	TA	TA	AA	TA	TA	TA	TA	TA	TA	TA	AA	AA	AA	TA	TA	TA	AA	TA	TA	TA	TA	AA
contig19785_171	T	A	AT	TT	AT	AT	TT	AT	AT	AT	TT	AT	TT	AT	AT	AT	AT	TT	AT	AT	TT	AT	AT	AT	AT	AT	TT	TT	TT	TT	AT	AT	AT	TT	AT	TT	AT	AT	AT	AT	AT	TT	AT	TT	AT	AT	AT	AT	AT
contig795635_125	C	A	AC	CC	CC	CC	AC	AC	AC	AC	AC	CC	CC	AC	AC	CC	AC	CC	AC	CC	CC	AC	CC	AC	CC	AC	AC	AC	AC	CC	AC	AC	AC	AC	AC	AC	AC	CC	CC	CC	AC	AC	AC	CC	AC	AC	AC	AC	CC
contig703993_167	G	A	AG	GG	AG	AG	GG	AG	AG	AG	GG	AG	GG	AG	AG	AG	AG	GG	AG	AG	GG	AG	AG	AG	AG	AG	GG	GG	GG	GG	AG	AG	AG	GG	AG	GG	AG	AG	AG	AG	AG	GG	AG	GG	AG	AG	AG	AG	AG
contig703993_71	C	T	CC	TT	CC	CC	TT	CC	CC	CC	TC	TC	TT	CC	CC	TC	CC	TT	CC	TC	TT	CC	TC	CC	TC	CC	TC	TC	TC	TT	CC	CC	CC	TC	CC	TC	CC	TC	TC	TC	CC	TC	CC	TT	CC	CC	CC	CC	TC
contig634757_157	G	A	AG	GG	AG	AG	GG	AG	AG	AG	GG	AG	GG	AG	AG	AG	AG	GG	AG	AG	GG	AG	AG	AG	AG	AG	GG	GG	GG	GG	AG	AG	AG	GG	AG	GG	AG	AG	AG	AG	AG	GG	AG	GG	AG	AG	AG	AG	AG
contig634757_33	A	G	GA	AA	GA	GA	AA	GA	GA	GA	AA	GA	AA	GA	GA	GA	GA	AA	GA	GA	AA	GA	GA	GA	GA	GA	AA	AA	AA	AA	GA	GA	GA	AA	GA	AA	GA	GA	GA	GA	GA	AA	GA	AA	GA	GA	GA	GA	GA
contig795635_127	G	T	TG	GG	GG	GG	TG	TG	TG	TG	TG	GG	GG	TG	TG	GG	TG	GG	TG	GG	GG	TG	GG	TG	GG	TG	TG	TG	TG	GG	TG	TG	TG	TG	TG	TG	TG	GG	GG	GG	TG	TG	TG	GG	GG	GG	TG	GG	GG
contig634757_117	C	T	TC	CC	TC	TC	CC	TC	TC	TC	CC	TC	CC	TC	TC	TC	TC	CC	TC	TC	CC	TC	TC	TC	TC	TC	CC	CC	CC	CC	TC	TC	TC	CC	TC	CC	TC	TC	TC	TC	TC	CC	TC	CC	CC	CC	TC	CC	TC
contig703993_272	G	A	AG	GG	AG	AG	GG	AG	AG	AG	GG	AG	GG	AG	AG	AG	AG	GG	AG	AG	GG	AG	AG	AG	AG	AG	GG	GG	GG	GG	AG	AG	AG	GG	AG	GG	AG	AG	AG	AG	AG	GG	AG	GG	GG	GG	AG	GG	AG
contig795635_138	G	A	AG	GG	AG	AG	GG	AG	AG	AG	GG	AG	GG	AG	AG	AG	AG	GG	AG	AG	GG	AG	AG	AG	AG	AG	GG	GG	GG	GG	AG	AG	AG	GG	AG	GG	AG	AG	AG	AG	AG	GG	AG	GG	GG	GG	AG	GG	AG
contig773643_17	C	T	TC	CC	TC	TC	CC	TC	TC	TC	CC	TC	CC	TC	TC	TC	TC	CC	TC	TC	CC	TC	TC	CC	TC	TC	CC	CC	CC	CC	TC	TC	TC	CC	TC	CC	TC	TC	TC	TC	TC	CC	TC	CC	CC	CC	TC	CC	TC
contig773643_25	G	A	GG	AA	AG	AG	AG	GG	GG	GG	AG	AG	AA	GG	GG	AG	GG	AA	GG	GG	AA	GG	AG	AG	AG	GG	AG	AG	AG	AA	GG	GG	GG	AG	GG	AG	GG	AG	AG	AG	GG	AG	GG	AA	GG	GG	GG	GG	AG
contig634757_164	T	C	CT	TT	TT	TT	CT	CT	CT	CT	CT	TT	TT	CT	CT	TT	CT	TT	CT	TT	TT	CT	TT	CT	TT	CT	CT	CT	CT	TT	CT	CT	CT	CT	CT	CT	CT	TT	TT	TT	CT	CT	CT	TT	TT	TT	TT	TT	TT
contig662076_156	G	A	AG	GG	AG	AG	GG	AG	AG	AG	GG	AG	GG	AG	AG	AG	AG	GG	AG	AG	GG	AG	AG	GG	AG	AG	GG	GG	GG	GG	AG	AG	AG	GG	AG	GG	AG	AG	AG	AG	AG	GG	AG	GG	GG	GG	AG	GG	GG
contig662076_187	C	A	CC	AA	AC	AC	AC	CC	CC	CC	AA	AC	AA	CC	CC	AC	CC	AA	CC	CC	AA	CC	AC	AC	AC	CC	AC	AC	AC	AA	CC	CC	CC	AC	CC	AC	CC	AC	AC	AC	CC	AC	CC	AA	CC	CC	CC	CC	AA
contig662076_186	T	C	TT	CC	CT	CT	CT	TT	TT	TT	CC	CT	CC	TT	TT	CT	TT	CC	TT	TT	CC	TT	CT	CT	CT	TT	CT	CT	CT	CC	TT	TT	TT	CT	TT	CT	TT	CT	CT	CT	TT	CT	TT	CC	TT	TT	TT	TT	CC
contig662076_146	A	T	TA	AA	TA	TA	AA	TA	TA	TA	AA	TA	AA	TA	TA	TA	TA	AA	TA	TA	AA	TA	TA	AA	TA	TA	AA	AA	AA	AA	TA	TA	TA	AA	TA	AA	TA	TA	TA	TA	TA	AA	TA	AA	AA	AA	AA	AA	AA
contig662076_84	A	C	CA	AA	CA	CA	AA	CA	CA	CA	AA	CA	AA	CA	CA	CA	CA	AA	CA	CA	AA	CA	CA	AA	CA	CA	AA	AA	AA	AA	CA	CA	CA	AA	CA	AA	CA	CA	CA	CA	CA	AA	CA	AA	AA	AA	AA	AA	AA
contig662076_131	A	G	GA	AA	GA	GA	AA	GA	GA	GA	AA	GA	AA	GA	GA	GA	GA	AA	GA	GA	AA	GA	GA	AA	GA	GA	AA	AA	AA	AA	GA	GA	GA	AA	GA	AA	GA	GA	GA	GA	GA	AA	GA	AA	AA	AA	AA	AA	AA
contig662076_149	G	A	AG	GG	AG	AG	GG	AG	AG	AG	GG	AG	GG	AG	AG	AG	AG	GG	AG	AG	GG	AG	AG	GG	AG	AG	GG	GG	GG	GG	AG	AG	AG	GG	AG	GG	AG	AG	AG	AG	AG	GG	AG	GG	GG	GG	GG	GG	GG
contig48525_89	T	A	TT	AA	AT	AT	AT	TT	TT	TT	AA	AT	AA	TT	TT	AT	TT	AA	TT	TT	AA	TT	AT	AT	AT	TT	AT	AT	TT	AA	TT	TT	TT	AT	TT	AT	TT	AT	AT	AT	AT	AT	TT	AA	TT	TT	TT	TT	AA
contig48525_18	T	C	TT	CC	CT	CT	CT	TT	TT	TT	CC	CT	CC	TT	TT	CT	TT	CC	TT	TT	CC	TT	CT	CT	CT	TT	CT	CT	TT	CC	TT	TT	TT	CT	TT	CT	TT	CT	CT	CT	CT	CT	TT	CC	TT	TT	TT	TT	CC
contig48525_132	A	C	CA	AA	CA	CA	AA	CA	CA	CA	AA	CA	AA	CA	CA	CA	CA	AA	CA	CA	AA	CA	CA	AA	CA	CA	AA	AA	CA	AA	CA	CA	CA	AA	CA	AA	CA	CA	CA	CA	CA	AA	CA	AA	CA	CA	CA	CA	AA
contig48525_38	A	T	TA	AA	AA	AA	TA	TA	TA	TA	AA	AA	AA	TA	TA	AA	TA	AA	TA	TA	AA	TA	AA	TA	AA	TA	TA	TA	TA	AA	TA	TA	TA	TA	TA	TA	TA	AA	AA	AA	AA	TA	TA	AA	TA	TA	TA	TA	AA
contig48525_39	T	C	CT	TT	TT	TT	CT	CT	CT	CT	TT	TT	TT	CT	CT	TT	CT	TT	CT	CT	TT	CT	TT	CT	TT	CT	CT	CT	CT	TT	CT	CT	CT	CT	CT	CT	CT	TT	TT	TT	TT	CT	CT	TT	CT	CT	CT	CT	TT
contig744006_27	A	G	GA	AA	GA	GA	AA	GA	GA	GA	AA	GA	AA	GA	GA	GA	GA	AA	GA	GA	AA	GA	GA	AA	GA	GA	AA	AA	GA	AA	GA	GA	GA	AA	GA	AA	GA	GA	GA	GA	GA	AA	GA	AA	GA	GA	GA	GA	AA
contig70151_72	C	T	TC	CC	CC	CC	TC	TC	TC	TC	CC	CC	CC	TC	TC	CC	TC	CC	TC	TC	CC	TC	CC	TC	CC	TC	TC	TC	TC	CC	TC	TC	TC	TC	TC	TC	TC	CC	CC	CC	CC	TC	TC	CC	CC	CC	TC	CC	CC
contig70151_52	G	A	AG	GG	GG	GG	AG	AG	AG	AG	GG	GG	GG	AG	AG	GG	AG	GG	AG	AG	GG	AG	GG	AG	GG	AG	AG	AG	AG	GG	AG	AG	AG	AG	AG	AG	AG	GG	GG	GG	GG	AG	AG	GG	GG	GG	AG	GG	GG
contig70151_40	C	T	CC	TT	TC	CC	TT	CC	CC	CC	TT	TC	TT	CC	CC	TC	CC	TT	CC	CC	TT	CC	TC	TC	TC	CC	TC	TC	CC	TT	CC	CC	CC	TC	CC	TC	CC	TC	TC	TC	TC	TC	CC	TT	CC	CC	CC	CC	TT
contig70151_4	C	G	CC	GG	GC	CC	GG	CC	CC	CC	GG	GC	GG	CC	CC	GC	CC	GG	CC	CC	GG	CC	GC	GC	GC	CC	GC	GC	CC	GG	CC	CC	CC	GC	CC	GC	CC	GC	GC	GC	GC	GC	CC	GG	CC	CC	CC	CC	GG
contig485206_101	G	A	AG	GG	AG	AG	GG	AG	AG	AG	GG	AG	GG	AG	AG	AG	AG	GG	AG	AG	GG	AG	AG	GG	AG	AG	GG	GG	AG	GG	AG	AG	AG	GG	AG	GG	AG	AG	AG	AG	AG	GG	AG	GG	AG	AG	AG	AG	GG
contig602799_36	G	A	AG	GG	GG	GG	AG	AG	AG	AG	GG	GG	GG	AG	AG	GG	AG	GG	AG	AG	GG	AG	GG	AG	GG	AG	AG	AG	AG	GG	AG	AG	AG	AG	AG	GG	AG	GG	GG	GG	GG	AG	AG	GG	AG	GG	AG	GG	GG
contig602799_50	G	A	AA	GG	AG	AG	AG	AA	AA	AA	GG	AG	GG	AA	AA	AG	AA	GG	AA	AA	GG	AA	AG	AG	AG	AA	AG	AG	AA	GG	AA	AA	AA	AG	AA	GG	AA	AG	AG	AG	AG	AG	AA	GG	AA	AA	AA	AA	GG
contig31155_234	A	G	GA	AA	GA	GA	AA	GA	GA	GA	AA	GA	AA	GA	GA	GA	GA	AA	GA	GA	AA	GA	GA	AA	GA	GA	AA	AA	GA	AA	GA	GA	GA	AA	GA	AA	GA	GA	GA	GA	GA	AA	GA	AA	GA	GA	GA	GA	AA
contig602799_105	G	A	AG	GG	GG	GG	AG	AG	AG	AG	GG	GG	GG	AG	AG	GG	AG	GG	AG	AG	GG	AG	GG	AG	GG	AG	AG	AG	AG	GG	AG	AG	AG	AG	AG	GG	AG	GG	GG	GG	GG	AG	AG	GG	AG	GG	AG	GG	GG
contig31155_66	T	C	TT	CC	CT	CT	CT	TT	TT	TT	CC	CT	CC	TT	TT	CT	TT	CC	TT	TT	CC	TT	CT	CT	CT	TT	CT	CT	TT	CC	TT	TT	TT	CT	TT	CT	TT	CT	CT	CT	CT	CT	TT	CC	TT	TT	TT	TT	CC
contig31155_201	C	T	TC	CC	CC	CC	TC	TC	TC	TC	CC	CC	CC	TC	TC	CC	TC	CC	TC	TC	CC	TC	CC	TC	CC	TC	TC	TC	TC	CC	TC	TC	TC	TC	TC	TC	TC	CC	CC	CC	CC	TC	TC	CC	TC	TC	TC	TC	CC
contig31155_28	C	A	CC	AA	AC	AC	AC	CC	CC	CC	AA	AC	AA	CC	CC	AC	CC	AA	CC	CC	AA	CC	AC	AC	AC	CC	AC	AC	CC	AA	CC	CC	CC	AC	CC	AC	CC	AC	AC	AC	AC	AC	CC	AA	CC	CC	CC	CC	AA
contig31155_127	C	T	CC	TT	TC	TC	TC	CC	CC	CC	TT	TC	TT	CC	CC	TC	CC	TT	CC	CC	TT	CC	TC	TC	TC	CC	TC	TC	CC	TT	CC	CC	CC	TC	CC	TC	CC	TC	TC	TC	TC	TC	CC	TT	CC	TC	TC	TC	TT
contig602799_7	C	A	CC	AA	AC	AC	AC	CC	CC	CC	AA	AC	AA	CC	CC	AC	CC	AA	CC	CC	AA	CC	AC	AC	AC	CC	AC	AC	CC	AA	CC	CC	CC	AC	CC	AA	CC	AC	AC	AC	AC	AC	CC	AA	AC	AC	AC	AC	AA
contig54611_4	C	T	TC	CC	TC	TC	CC	TC	TC	TC	CC	TC	CC	TC	TC	TC	TC	CC	TC	TC	CC	TC	TC	CC	TC	TC	CC	CC	TC	CC	TC	TC	TC	CC	TC	CC	TC	TC	TC	TC	TC	CC	TC	CC	TC	TC	TC	TC	CC
contig18197_114	G	C	CG	GG	GG	GG	CG	CG	CG	CG	GG	GG	GG	CC	CC	GG	CG	GG	CG	GG	GG	CG	GG	CG	GG	GG	CG	CG	CG	GG	CG	CG	CG	CG	CG	CG	CG	GG	GG	GG	GG	CG	CG	GG	CG	CG	CG	CG	GG
contig31155_223	C	T	TC	CC	TC	TC	CC	TC	TC	TC	CC	TC	CC	TC	TC	TC	TC	CC	TC	TC	CC	TC	TC	CC	TC	TC	CC	CC	TC	CC	TC	TC	TC	CC	TC	CC	TC	TC	TC	TC	TC	CC	TC	CC	TC	TC	TC	TC	CC
contig10693_49	G	A	GG	AA	AG	AG	AG	GG	GG	GG	AA	AG	AA	GG	GG	AG	GG	AA	GG	GG	AA	GG	AG	AG	AG	GG	AG	AG	GG	AA	GG	GG	GG	AG	GG	AG	GG	AG	AG	AG	AG	AG	GG	AA	AG	AG	AG	AG	AA
contig10693_140	A	T	AA	TT	TA	TA	TA	AA	AA	AA	TT	TA	TT	AA	AA	TA	AA	TT	AA	AA	TT	AA	TA	TA	TA	AA	TA	TA	AA	TT	AA	AA	AA	TA	AA	TA	AA	TA	TA	TA	TA	TA	AA	TT	TA	TA	TA	TA	TT
contig18197_98	T	G	GT	TT	TT	TT	GT	GT	GT	GT	TT	TT	TT	GG	GG	TT	GT	TT	GT	TT	TT	GT	TT	GT	TT	TT	GT	GT	GT	TT	GT	GT	GT	GT	GT	GT	GT	TT	TT	TT	TT	GT	GT	TT	GT	GT	GT	GT	TT
contig812481_47	C	A	AC	CC	CC	CC	AC	AC	AC	AC	CC	CC	CC	AC	AC	CC	AC	CC	AC	AC	CC	AC	CC	AC	CC	AC	AC	AC	AC	CC	AC	AC	AC	AC	AC	AC	AC	CC	CC	CC	CC	AC	AC	CC	AC	CC	CC	CC	CC
contig18197_175	T	A	AT	TT	TT	TT	AT	AT	AT	AT	TT	TT	TT	AA	AA	TT	AT	TT	AT	TT	TT	AT	TT	AT	TT	TT	AT	AT	AT	TT	AT	AT	AT	AT	AT	AT	AT	TT	TT	TT	TT	AT	AT	TT	AT	AT	AT	AT	TT
contig10693_145	C	T	CC	TT	TC	TC	TC	CC	CC	CC	TT	TC	TT	CC	CC	TC	CC	TT	CC	CC	TT	CC	TC	TC	TC	CC	TC	TC	CC	TT	CC	CC	CC	TC	CC	TC	CC	TC	TC	TC	TC	TC	CC	TT	TC	TC	TC	TC	TT
contig18197_181	G	C	CG	GG	GG	GG	CG	CG	CG	CG	GG	GG	GG	CC	CC	GG	CG	GG	CG	GG	GG	CG	GG	CG	GG	GG	CG	CG	CG	GG	CG	CG	CG	CG	CG	CG	CG	GG	GG	GG	GG	CG	CG	GG	CG	CG	CG	CG	GG
contig812481_70	C	T	TT	CC	TC	CC	TC	TT	TT	TT	CC	TC	CC	TT	TT	TC	TT	CC	TT	TT	CC	TT	TC	TC	CC	TT	TC	TC	TT	CC	TT	TT	TT	TC	TT	TC	TT	CC	TC	CC	CC	TC	TT	CC	TT	TC	TC	TC	CC
contig812481_69	T	C	CC	TT	CT	TT	CT	CC	CC	CC	TT	CT	TT	CC	CC	CT	CC	TT	CC	CC	TT	CC	CT	CT	CT	CC	CT	CT	CC	TT	CC	CC	CC	CT	CC	CT	CC	TT	CT	TT	CT	CT	CC	TT	CC	CT	CT	CT	TT
contig44605_93	A	G	GA	AA	AA	AA	GA	GA	GA	GA	AA	AA	AA	GA	GA	AA	GA	AA	GA	GA	AA	GA	AA	GA	AA	GA	GA	GA	GA	AA	GA	GA	GA	GA	GA	GA	GA	AA	AA	AA	AA	GA	GA	AA	GA	AA	AA	AA	AA
contig79722_200	A	G	AA	GG	GG	GG	GA	AA	AA	AA	GG	GA	GG	AA	AA	GG	AA	GG	AA	AA	GG	AA	GA	GA	GA	AA	GA	GA	AA	GG	AA	AA	AA	GA	AA	GA	AA	GG	GG	GG	GG	GA	AA	GG	AA	GA	GA	GA	GG
contig668313_61	C	T	TC	CC	TC	TC	CC	TC	TC	TC	CC	TC	CC	TC	TC	CC	TC	CC	TC	TC	CC	TC	TC	CC	TC	TC	CC	CC	TC	CC	TC	TC	TC	CC	TC	CC	TC	TC	TC	TC	TC	CC	TC	CC	TC	TC	TC	TC	CC
contig18197_126	A	G	GA	AA	AA	AA	GA	GA	GA	GA	AA	AA	AA	GG	GG	AA	GA	AA	GA	AA	AA	GA	AA	GA	AA	AA	GA	GA	GA	AA	GA	GA	GA	GA	GA	GA	GA	AA	AA	AA	AA	GA	GA	AA	GA	GG	GG	GG	AA
contig44605_129	T	A	TT	AA	AT	AT	AT	TT	TT	TT	AA	AT	AA	TT	TT	AA	TT	AA	TT	TT	AA	TT	AT	AT	AT	TT	AT	AT	TT	AA	TT	TT	TT	AT	TT	AT	TT	AT	AT	AT	AT	AT	TT	AA	TT	AT	AT	AT	AA
contig18197_43	T	C	CT	TT	CT	CT	TT	CT	CT	CT	TT	CT	TT	TT	TT	TT	CT	TT	CT	CC	TT	CT	CT	TT	TT	CC	TT	TT	CT	TT	CT	CT	CT	TT	CT	TT	CT	CT	CT	CT	CT	TT	CT	TT	CT	CT	CT	CT	TT
contig46296_142	T	G	GT	TT	TT	TT	GT	GT	GT	GT	TT	TT	GT	GT	GT	TT	GT	TT	GT	GT	TT	GT	TT	GT	TT	GT	GT	GT	GT	TT	GT	GT	GT	GT	GT	GT	GT	TT	TT	TT	TT	GT	GT	TT	GT	TT	TT	TT	TT
contig5116_271	C	T	TC	CC	CC	CC	TC	TC	TC	TC	CC	CC	TC	TC	TC	CC	TC	CC	TC	TC	CC	TC	CC	TC	CC	TC	TC	TC	TC	CC	TC	TC	TC	TC	TC	TC	TC	CC	CC	CC	CC	TC	TC	CC	TC	TC	TC	TC	CC
contig6439_84	C	T	CC	TT	TC	TC	TC	CC	CC	CC	TT	TT	TC	CC	CC	TT	CC	TT	CC	CC	TT	CC	TC	TC	TC	CC	TC	TC	CC	TT	CC	CC	CC	TC	CC	TC	CC	TC	TC	TC	TC	TC	CC	TT	TC	TC	TC	TC	TT
contig5116_143	C	G	GC	CC	CC	CC	GC	GC	GC	GC	CC	CC	GC	GC	GC	CC	GC	CC	GC	GC	CC	GC	CC	GC	CC	GC	GC	GC	GC	CC	GC	GC	GC	GC	GC	GC	GC	CC	CC	CC	CC	GC	GC	CC	GC	GC	GC	GC	CC
contig6439_11	C	T	CC	TT	TC	TC	TC	CC	CC	CC	TT	TT	TC	CC	CC	TT	CC	TT	CC	CC	TT	CC	TC	TC	TC	CC	TC	TC	CC	TT	CC	CC	CC	TC	CC	TC	CC	TC	TC	TC	TC	TC	CC	TT	TC	TC	TC	TC	TT
contig534714_159	T	G	GT	TT	TT	TT	GT	GT	GT	GT	TT	TT	GT	GT	GT	TT	GT	TT	GT	GT	TT	GT	TT	GT	TT	GT	GT	GT	GT	TT	GT	GT	GT	GT	GT	GT	GT	TT	TT	TT	TT	GT	GT	TT	GT	GT	GT	GT	TT
contig49319_103	T	C	CT	TT	TT	TT	CT	CT	CT	CT	TT	TT	CT	CT	CT	TT	CT	TT	CT	CT	TT	CT	TT	CT	TT	CT	CT	CT	CT	TT	CT	CT	CT	CT	CT	CT	CT	TT	TT	TT	TT	CT	CT	TT	CT	CT	CT	CT	TT
contig408379_110	C	T	CC	TT	TC	TC	TC	CC	CC	CC	TT	TT	TC	CC	CC	TT	CC	TT	CC	CC	TT	CC	TC	TC	TC	CC	TC	TC	CC	TT	CC	CC	CC	TC	CC	TC	CC	TC	TC	TC	TC	TC	CC	TT	TC	TC	TC	TC	TT
contig534714_91	G	C	CG	GG	GG	GG	CG	CG	CG	CG	GG	GG	CG	CG	CG	GG	CG	GG	CG	CG	GG	CG	GG	CG	GG	CG	CG	CG	CG	GG	CG	CG	CG	CG	CG	CG	CG	GG	GG	GG	GG	CG	CG	GG	CG	CG	CG	CG	GG
contig6439_78	C	T	CC	TT	TC	TC	TC	CC	CC	CC	TT	TT	TC	CC	CC	TT	CC	TT	CC	CC	TT	CC	TC	TC	TC	CC	TC	TC	CC	TT	CC	CC	CC	TC	CC	TC	CC	TC	TC	TC	TC	TC	CC	TT	TC	TC	TC	TC	TT
contig5116_129	G	A	AG	GG	AG	AG	GG	AG	AG	AG	GG	GG	GG	AG	AG	GG	AG	GG	AG	AG	GG	AG	AG	GG	AG	AG	GG	GG	AG	GG	AG	AG	AG	GG	AG	GG	AG	AG	AG	AG	AG	GG	AG	GG	GG	GG	GG	GG	GG
contig46296_190	T	C	TT	CC	CT	CT	CT	TT	TT	TT	CC	CC	CT	TT	TT	CC	TT	CC	TT	TT	CC	TT	CT	CT	CT	TT	CT	CT	TT	CC	TT	TT	TT	CT	TT	CT	TT	CT	CT	CT	CT	CT	TT	CC	CT	CT	CT	CT	CC
contig5116_124	A	G	AA	GG	GA	GA	GA	AA	AA	AA	GG	GG	GA	AA	AA	GG	AA	GG	AA	AA	GG	AA	GA	GA	GA	AA	GA	GA	AA	GG	AA	AA	AA	GA	AA	GA	AA	GA	GA	GA	GA	GA	AA	GG	GA	GA	GA	GA	GG
contig46296_151	T	A	AT	TT	TT	TT	AT	AT	AT	AT	TT	TT	AT	AT	AT	TT	AT	TT	AT	AT	TT	AT	TT	AT	TT	AT	AT	AT	AT	TT	AT	AT	AT	AT	AT	AT	AT	TT	TT	TT	TT	AT	AT	TT	TT	TT	TT	AT	TT
contig46296_193	C	A	CC	AA	AC	AC	AC	CC	CC	CC	AA	AA	AC	CC	CC	AA	CC	AA	CC	CC	AA	CC	AC	AC	AC	CC	AC	AC	CC	AA	CC	CC	CC	AC	CC	AC	CC	AC	AC	AC	AC	AC	CC	AA	AC	AC	AC	AC	AA
contig534714_6	C	T	TC	CC	TC	TC	CC	TC	TC	TC	CC	CC	CC	TC	TC	CC	TC	CC	TC	TC	CC	TC	TC	CC	TC	TC	CC	CC	TC	CC	TC	TC	TC	CC	TC	CC	TC	TC	TC	TC	TC	CC	TC	CC	CC	CC	CC	CC	CC
contig46296_103	A	T	AA	TT	TA	TA	TA	AA	AA	AA	TT	TT	TA	AA	AA	TT	AA	TT	AA	AA	TT	AA	TA	TA	TA	AA	TA	TA	AA	TT	AA	AA	AA	TA	AA	TA	AA	TA	TA	TA	TA	TA	AA	TT	TA	TA	TA	TA	TT
contig27788_13	A	C	CA	AA	CA	CA	AA	CA	CA	CA	AA	AA	AA	CA	CA	AA	CA	AA	CA	CA	AA	CA	CA	AA	CA	CA	AA	AA	CA	AA	CA	AA	CA	AA	CA	AA	CA	CA	CA	CA	CA	AA	CA	AA	CA	CA	CA	AA	AA
contig27788_60	C	T	CC	TT	TC	TC	TC	CC	CC	CC	TT	TT	TC	CC	CC	TT	CC	TT	CC	CC	TT	CC	TC	TC	TC	CC	TC	TC	CC	TT	CC	TC	CC	TC	CC	TC	CC	TC	TC	TC	TC	TC	CC	TT	TC	TC	TC	TC	TT
contig14143_159	G	C	CG	GG	CG	CG	GG	CG	CG	CG	CG	GG	GG	CG	CG	GG	CG	GG	CG	CG	GG	CG	CG	GG	CG	CG	GG	GG	CG	GG	CG	GG	CG	GG	CG	GG	CG	CG	CG	CG	CG	GG	CG	GG	CG	CG	CG	CG	GG
contig3828_10	T	C	TT	CC	CT	CT	CT	TT	TT	TT	CT	CC	CT	TT	TT	CC	TT	CC	TT	TT	CC	TT	CT	CT	CT	TT	CT	CT	TT	CC	TT	CT	TT	CT	TT	CT	TT	CT	CT	CT	CT	CT	TT	CC	CT	CT	CT	CT	CC
contig14143_2	A	C	CA	AA	CA	CA	AA	CA	CA	CA	CA	AA	AA	CA	CA	AA	CA	AA	CA	CA	AA	CA	CA	AA	CA	CA	AA	AA	CA	AA	CA	AA	CA	AA	CA	AA	CA	CA	CA	CA	CA	AA	CA	AA	CA	CA	CA	CA	AA
contig37553_69	G	A	AG	GG	AG	AG	GG	AG	AG	AG	AG	GG	GG	AG	AG	GG	AG	GG	AG	AG	GG	AG	AG	GG	AG	AG	GG	GG	AG	GG	AG	GG	AG	GG	AG	GG	AG	AG	AG	AG	AG	GG	AG	GG	AG	AG	AG	AG	GG
contig85_130	G	C	CG	GG	CG	CG	GG	CG	CG	CG	CG	GG	GG	CG	CG	GG	CG	GG	CG	CG	GG	CG	CG	GG	CG	CG	GG	GG	CG	GG	CG	GG	CG	GG	CG	GG	CG	CG	CG	CG	CG	GG	CG	GG	CG	CG	CG	CG	GG
contig41279_79	C	T	TC	CC	TC	TC	CC	TC	TC	TC	TC	CC	CC	TC	TC	CC	TC	CC	TC	TC	CC	TC	TC	CC	TC	TC	CC	CC	TC	CC	TC	CC	TC	CC	TC	CC	TC	TC	TC	TC	TC	CC	TC	CC	TC	TC	TC	TC	CC
contig85_38	C	T	TC	CC	TC	TC	CC	TC	TC	TC	TC	CC	CC	TC	TC	CC	TC	CC	TC	TC	CC	TC	TC	CC	TC	TC	CC	CC	TC	CC	TC	CC	TC	CC	TC	CC	TC	TC	TC	TC	TC	CC	TC	CC	TC	TC	TC	TC	CC
contig39775_24	G	T	TG	GG	TG	TG	GG	TG	TG	TG	TG	GG	GG	TG	TG	GG	TG	GG	TG	TG	GG	TG	TG	GG	TG	TG	GG	GG	TG	GG	TG	GG	TG	GG	TG	GG	TG	TG	TG	TG	TG	GG	TG	GG	TG	TG	TG	TG	GG
contig39775_91	C	G	GC	CC	GC	GC	CC	GC	GC	GC	GC	CC	CC	GC	GC	CC	GC	CC	GC	GC	CC	GC	GC	CC	GC	GC	CC	CC	GC	CC	GC	CC	GC	CC	GC	CC	GC	GC	GC	GC	GC	CC	GC	CC	GC	GC	GC	GC	CC
contig738700_6	G	A	AG	GG	AG	AG	GG	AG	AG	AG	AG	GG	GG	AG	AG	GG	AG	GG	AG	AG	GG	AG	AG	GG	AG	AG	GG	GG	AG	GG	AG	GG	AG	GG	AG	GG	AG	AG	AG	AG	AG	GG	AG	GG	AG	AG	AG	AG	GG
contig85_179	A	G	AA	GG	GA	GA	GA	AA	AA	AA	GA	GG	GA	AA	AA	GG	AA	GG	AA	AA	GG	AA	GA	GA	GA	AA	GA	GA	AA	GG	AA	GA	AA	GA	AA	GA	AA	GA	GA	AA	GA	GA	AA	GG	AA	AA	AA	AA	GG
contig738700_96	T	C	CT	TT	CT	CT	TT	CT	CT	CT	CT	TT	TT	CT	CT	TT	CT	TT	CT	CT	TT	CT	CT	TT	CT	CT	TT	TT	CT	TT	CT	TT	CT	TT	CT	TT	CT	CT	CT	CT	CT	TT	CT	TT	CT	CC	CC	CT	TT
contig14143_155	T	C	CT	TT	CT	CT	TT	CT	CT	CT	CT	TT	TT	CT	CT	TT	CT	TT	CT	CT	TT	CT	CT	TT	CT	CT	TT	TT	CT	TT	CT	TT	CT	TT	CT	TT	CT	CT	CT	CT	CT	TT	CT	TT	CT	CT	CT	CT	TT
contig42129_144	T	A	AT	TT	AT	AT	TT	AT	AT	TT	AT	TT	TT	AT	AT	TT	AT	TT	AT	AT	TT	AT	AT	TT	AT	AT	TT	TT	AT	TT	AT	TT	AT	TT	AT	TT	AT	AT	AT	AT	AT	TT	AT	TT	AT	AT	AT	AT	TT
contig85_203	G	A	AG	GG	AG	AG	GG	AG	AG	AG	AG	GG	GG	AG	AG	GG	AG	GG	AG	AG	GG	AG	AG	GG	AG	AG	GG	GG	AG	GG	AG	GG	AG	GG	AG	GG	AG	AG	AG	AG	AG	GG	AG	GG	GG	GG	GG	GG	GG
contig685036_104	G	A	AG	GG	GG	GG	AG	AG	AG	AG	GG	GG	AG	AG	AG	GG	AG	GG	AG	AG	GG	AG	GG	AG	GG	AG	AG	AG	AG	GG	AG	AG	AG	AG	AG	AG	AG	GG	GG	GG	GG	AG	AG	GG	GG	AG	AG	GG	GG
contig738700_26	G	A	AG	GG	AG	AG	GG	AG	AG	AG	AG	GG	GG	AG	AG	GG	AG	GG	AG	AG	GG	AG	AG	GG	AG	AG	GG	GG	AG	GG	AG	GG	AG	GG	AG	GG	AG	AG	AG	AG	AG	GG	AG	GG	GG	GG	GG	GG	GG
contig85_83	A	G	AA	GG	GA	GA	GA	AA	AA	AA	GA	GG	GA	AA	AA	GG	AA	GG	AA	AA	GG	AA	GA	GA	GA	AA	GA	GA	AA	GG	AA	GA	AA	GA	AA	GA	AA	GA	GA	GA	GA	GA	AA	GG	AA	AA	AA	AA	GG
contig85_174	T	A	TT	AA	AT	AT	AT	TT	TT	TT	AT	AA	AT	TT	TT	AA	TT	AA	TT	TT	AA	TT	AT	AT	AT	TT	AT	AT	TT	AA	TT	AT	TT	AT	TT	AT	TT	AT	AT	AA	AT	AT	TT	AA	TT	TT	TT	TT	AA
contig738700_57	G	A	GG	AA	AG	AG	AG	GG	GG	GG	AG	AA	AG	GG	GG	AA	GG	AA	GG	GG	AA	GG	AG	AG	AG	GG	AG	AG	GG	AA	GG	AG	GG	AG	GG	AG	GG	AG	AG	AG	AG	AG	GG	AA	GG	GG	GG	GG	AA
contig85_195	T	A	AT	TT	TT	TT	AT	AT	AT	AT	TT	TT	AT	AT	AT	TT	AT	TT	AT	AT	TT	AT	TT	AT	TT	AT	AT	AT	AT	TT	AT	AT	AT	AT	AT	AT	AT	TT	TT	TT	TT	AT	AT	TT	TT	AT	AT	TT	TT
contig85_198	A	C	CA	AA	AA	AA	CA	CA	CA	CA	AA	AA	CA	CA	CA	AA	CA	AA	CA	CA	AA	CA	AA	CA	AA	CA	CA	CA	CA	AA	CA	CA	CA	CA	CA	CA	CA	AA	AA	AA	AA	CA	CA	AA	AA	AA	AA	AA	AA
contig85_165	G	A	AG	GG	GG	GG	AG	AG	AG	AG	GG	GG	AG	AG	AG	GG	AG	GG	AG	AG	GG	AG	GG	AG	GG	AG	AG	AG	AG	GG	AG	AG	AG	AG	AG	AG	AG	GG	GG	GG	GG	AG	AG	GG	GG	GG	GG	GG	GG
contig85_208	T	G	GT	TT	TT	TT	GT	GT	GT	GT	TT	TT	GT	GT	GT	TT	GT	TT	GT	GT	TT	GT	TT	GT	TT	GT	GT	GT	GT	TT	GT	GT	GT	GT	GT	GT	GT	TT	TT	TT	TT	GT	GT	TT	TT	TT	TT	TT	TT
contig306965_24	C	A	AA	CC	AC	AC	AC	AA	AA	AA	AC	CC	AC	AA	AA	CC	AA	CC	AA	AA	CC	AA	AC	AC	CC	AA	AC	AC	AA	CC	AA	AC	AA	AC	AA	AC	AA	AC	AC	AC	AC	AC	AA	CC	CC	CC	CC	CC	CC
contig85_187	T	C	TT	CC	CT	CT	CT	TT	TT	TT	CT	CC	CT	TT	TT	CC	TT	CC	TT	TT	CC	TT	CT	CT	CT	TT	CT	CT	TT	CC	TT	CT	TT	CT	TT	CT	TT	CT	CT	CC	CT	CT	TT	CC	TT	TT	TT	TT	CC
contig554749_8	C	A	AC	CC	CC	CC	AC	AC	AC	AC	CC	CC	AC	AC	AC	CC	AC	CC	AC	AC	CC	AC	CC	AC	CC	AC	AC	AC	AC	CC	AC	AC	AC	AC	AC	AC	AC	CC	CC	CC	CC	AC	AC	CC	CC	CC	CC	CC	CC
contig42129_5	T	G	GT	TT	TT	TT	GT	GG	GT	GG	TT	TT	GT	GT	GT	TT	GT	TT	GT	GT	TT	GG	TT	GT	TT	GG	GT	GT	GG	TT	GG	GT	GG	GT	GT	GT	GT	TT	TT	TT	TT	GT	GT	TT	TT	TT	TT	TT	TT
contig738700_50	A	T	AA	TT	TA	TA	TA	AA	AA	AA	TA	TT	TA	AA	AA	TT	AA	TT	AA	AA	TT	AA	TA	TA	TA	AA	TA	TA	AA	TT	AA	TA	AA	TA	AA	TA	AA	TA	TA	TA	TA	TA	AA	TT	AA	AA	AA	AA	TT
contig738700_21	G	A	AG	GG	GG	GG	AG	AG	AG	AG	GG	GG	AG	AG	AG	GG	AG	GG	AG	AG	GG	AG	GG	AG	GG	AG	AG	AA	AG	GG	AG	AG	AG	AG	AG	AG	AG	GG	GG	GG	GG	AG	AG	GG	GG	GG	GG	GG	GG
contig306965_93	T	C	CT	TT	TT	TT	CT	CT	CT	CT	TT	TT	CT	CT	CT	TT	CT	TT	CT	CT	TT	CT	TT	CT	TT	CT	CT	CT	CT	TT	CT	CT	CT	CT	CT	CT	CT	TT	TT	TT	TT	CT	CT	TT	TT	TT	TT	TT	TT
contig738700_176	G	A	AG	GG	GG	GG	AG	AG	AG	AG	GG	GG	AG	AG	AG	GG	AG	GG	AG	AG	GG	AG	GG	AG	GG	AG	AG	AA	AG	GG	AG	AG	AG	AG	AG	AG	AG	GG	GG	GG	GG	AG	AG	GG	GG	GG	GG	GG	GG
contig85_190	G	T	GG	TT	TG	TG	TG	GG	GG	GG	TG	TT	TG	GG	GG	TT	GG	TT	GG	GG	TT	GG	TG	TG	TG	GG	TG	TG	GG	TT	GG	TG	GG	TG	GG	TG	GG	TG	TG	TG	TG	TG	GG	TT	GG	GG	GG	GG	TT
contig42129_7	T	A	AT	TT	TT	TT	AT	AA	AT	AA	TT	TT	AT	AT	AT	TT	AT	TT	AT	AT	TT	AA	TT	AT	TT	AA	AT	AT	AA	TT	AA	AT	AA	AT	AT	AT	AT	TT	TT	TT	TT	AT	AT	TT	TT	TT	TT	TT	TT
contig42129_38	T	G	GT	TT	TT	TT	GT	GG	GT	GG	TT	TT	GT	GT	GT	TT	GT	TT	GT	GT	TT	GG	TT	GT	TT	GG	GT	GT	GG	TT	GG	GT	GG	GT	GT	GT	GT	TT	TT	TT	TT	GT	GT	TT	TT	TT	TT	TT	TT
contig738700_22	T	C	TT	CC	CT	CT	CT	TT	TT	TT	CT	CC	CT	TT	TT	CC	TT	CC	TT	TT	CC	TT	CT	CT	CT	TT	CT	CT	TT	CC	TT	CT	TT	CT	TT	CT	TT	CT	CT	CT	CT	CT	TT	CC	TT	TT	TT	TT	CC
contig14143_156	C	T	CC	TT	TC	TC	TC	CC	CC	CC	TC	TT	TC	CC	CC	TT	CC	TT	CC	CC	TT	CC	TC	TC	TC	CC	TC	TC	CC	TT	CC	TC	CC	TC	CC	TC	CC	TC	TC	TC	TC	TC	CC	TT	CC	CC	CC	CC	TT
contig738700_3	C	T	TT	CC	TC	TC	TC	TT	TT	TT	TC	CC	TC	TT	TT	CC	TT	CC	TT	TT	CC	TT	TC	TC	TC	TT	TC	TC	TT	CC	TT	TC	TT	TC	TT	TC	TT	TC	TC	TC	TC	TC	TT	CC	CC	CC	CC	CC	CC
contig85_24	T	C	TT	CC	CT	CT	CT	TT	TT	TT	CT	CC	CT	TT	TT	CC	TT	CC	TT	TT	CC	TT	CT	CT	CT	TT	CT	CT	TT	CC	TT	CT	TT	CT	TT	CT	TT	CT	CT	CT	CT	CT	TT	CC	TT	TT	TT	TT	CC
contig42129_93	T	C	TT	CC	CT	CT	CT	TT	TT	TT	CT	CC	CT	TT	TT	CC	TT	CC	TT	TT	CC	TT	CT	CT	CT	TT	CT	CT	TT	CC	TT	CT	TT	CT	TT	CT	TT	CT	CT	CT	CT	CT	TT	CC	TT	TT	TT	TT	CC
contig2338_75	A	G	AA	GG	GA	GA	GA	AA	AA	AA	AA	GG	GA	AA	AA	GG	AA	GG	AA	AA	GG	AA	GA	GA	GA	AA	GA	GA	AA	GG	AA	GA	AA	GA	AA	GA	AA	GA	GA	GA	GA	GA	AA	GG	AA	AA	AA	AA	GG
contig2338_74	A	G	AA	GG	GA	GA	GA	AA	AA	AA	AA	GG	GA	AA	AA	GG	AA	GG	AA	AA	GG	AA	GA	GA	GA	AA	GA	GA	AA	GG	AA	GA	AA	GA	AA	GA	AA	GA	GA	GA	GA	GA	AA	GG	AA	AA	AA	AA	GG
contig435558_8	G	A	AG	AA	AG	AG	AG	GG	GG	GG	AG	AA	AG	GG	GG	AA	AG	AA	GG	GG	AA	GG	AG	AG	AG	GG	AG	AG	GG	AA	GG	AG	GG	AG	GG	AG	GG	AG	AG	AG	AG	AG	GG	AA	GG	GG	GG	GG	AA
contig6424_15	A	T	AA	AA	TA	TA	AA	TA	TA	TA	TA	AA	AA	TA	TA	AA	TA	AA	TA	TA	AA	TA	TA	AA	TA	TA	AA	AA	TA	AA	TA	AA	TA	AA	TA	AA	TA	TA	TA	TA	TA	AA	TA	AA	AA	AA	AA	AA	AA
contig6424_109	G	A	AG	GG	GG	GG	AG	AG	AG	AG	GG	GG	AG	AG	AG	GG	GG	GG	AG	AG	GG	AG	GG	AG	GG	AG	AG	AG	AG	GG	AG	AG	AG	AG	AG	AG	AG	GG	GG	GG	GG	AG	AG	GG	GG	GG	GG	GG	GG
contig435558_6	C	T	CC	CC	TC	TC	CC	TC	TC	TC	TC	CC	CC	TC	TC	CC	TC	CC	TC	TC	CC	TC	TC	CC	TC	TC	CC	CC	TC	CC	TC	CC	TC	CC	TC	CC	TC	TC	TC	TC	TC	CC	TC	CC	CC	CC	CC	CC	CC
contig6424_81	T	C	CT	TT	TT	TT	CT	CT	CT	CT	TT	TT	CT	CT	CT	TT	TT	TT	CT	CT	TT	CT	TT	CT	TT	CT	CT	CT	CT	TT	CT	CT	CT	CT	CT	CT	CT	TT	TT	TT	TT	CT	CT	TT	TT	TT	TT	TT	TT
contig6424_4	A	G	GA	GG	GA	GA	GA	AA	AA	AA	GA	GG	GA	AA	AA	GG	GA	GG	AA	AA	GG	AA	GA	GA	GA	AA	GA	GA	AA	GG	AA	GA	AA	GA	AA	AA	AA	GA	GA	GA	GA	GA	AA	GG	GA	GA	GA	GA	GG
contig554749_58	C	T	CC	CC	TC	TC	CC	TC	TC	TC	TC	CC	CC	TC	TC	CC	TC	CC	TC	TC	CC	TC	TC	CC	TC	TC	CC	CC	TC	CC	TC	CC	TC	CC	TC	CC	TC	TC	TC	TC	TC	CC	TC	CC	CC	CC	CC	CC	CC
contig6424_52	G	T	TG	TT	TG	TG	TG	GG	GG	GG	TG	TT	TG	GG	GG	TT	TG	TT	GG	GG	TT	GG	TG	TG	TG	GG	TG	TG	GG	TT	GG	TT	GG	TG	GG	GG	GG	TG	TG	TG	TG	TG	GG	TT	TG	TG	TG	TG	TT
contig52907_72	G	A	AG	AA	AG	AG	AG	GG	GG	GG	AG	AA	AG	GG	GG	AA	AG	AA	GG	GG	AA	GG	AG	AG	AG	GG	AG	AG	GG	AA	GG	AG	GG	AG	GG	AG	GG	AG	AG	AG	AG	AG	GG	AA	AG	AG	AG	AG	AA
contig28870_109	C	T	TC	CC	CC	CC	TC	TC	TC	TC	CC	CC	TC	TC	TC	CC	CC	CC	TC	TC	CC	TC	CC	TC	CC	TC	TC	TC	TC	CC	TC	TC	TC	TC	TC	TC	TC	CC	CC	CC	CC	TC	TC	CC	TC	TC	TC	TC	CC
contig610444_25	T	C	TT	TT	CT	CT	TT	CT	CT	CT	CT	TT	TT	CT	CT	TT	CT	TT	CT	CT	TT	CT	CT	TT	CT	CT	TT	TT	CT	TT	CT	TT	CT	TT	CT	TT	CT	CT	CT	CT	TT	TT	CT	TT	CT	CT	TT	CT	TT
contig28870_115	T	A	TT	TT	AT	AT	TT	AT	AT	AT	AT	TT	TT	AT	AT	TT	AT	TT	AT	AT	TT	AT	AT	TT	AT	AT	TT	TT	AT	TT	AT	TT	AT	TT	AT	TT	AT	AT	AT	AT	TT	TT	AT	TT	AT	AT	TT	AT	TT
contig40347_141	T	G	TT	TT	GT	GT	TT	GT	GT	GT	GT	TT	TT	GT	GT	TT	GT	TT	GT	GT	TT	GT	GT	TT	GT	GT	TT	TT	GT	TT	GT	TT	GT	TT	GT	TT	GT	GT	GT	GT	TT	TT	GT	TT	GT	GT	TT	GT	TT
contig8119_111	A	G	GA	AA	AA	AA	GA	GA	GA	GA	AA	AA	GA	GA	GA	AA	AA	AA	GA	GA	AA	GA	AA	GA	AA	GA	GA	GA	GA	AA	GA	GA	GA	GA	GA	GA	GA	AA	AA	AA	AA	GA	GA	AA	GA	GA	GA	GA	AA
contig119895_111	G	A	GG	GG	AG	AG	GG	AG	AG	AG	AG	GG	GG	AG	AG	GG	AG	GG	AG	AG	GG	AG	AG	GG	AG	AG	GG	GG	AG	GG	AG	GG	AG	GG	AG	GG	AG	AG	AG	AG	GG	GG	AG	GG	AG	AG	GG	AG	GG
contig40347_208	A	G	AA	AA	GA	GA	AA	GA	GA	GA	GA	AA	AA	GA	GA	AA	GA	AA	GA	GA	AA	GA	GA	AA	GA	GA	AA	AA	GA	AA	GA	AA	GA	AA	GA	AA	GA	GA	GA	GA	AA	AA	GA	AA	GA	GA	AA	GA	AA
contig40347_15	C	T	TC	TT	TC	TC	TC	CC	CC	CC	TC	TT	TC	CC	CC	TT	TC	TC	CC	CC	TT	CC	TC	TC	TC	CC	TC	TC	CC	TT	CC	TC	CC	TC	CC	TC	CC	TC	TC	TC	TT	TC	CC	TT	CC	CC	CC	CC	TT
contig40347_34	C	T	TC	TT	TC	TC	TC	CC	CC	CC	TC	TT	TC	CC	CC	TT	TC	TC	CC	CC	TT	CC	TC	TC	TC	CC	TC	TC	CC	TT	CC	TC	CC	TC	CC	TC	CC	TC	TC	TC	TT	TC	CC	TT	CC	CC	CC	CC	TT
contig40347_195	A	G	GA	GG	GA	GA	GA	AA	AA	AA	GA	GG	GA	AA	AA	GG	GA	GA	AA	AA	GG	AA	GA	GA	GA	AA	GA	GA	AA	GG	AA	GA	AA	GA	AA	GA	AA	GA	GA	GA	GG	GA	AA	GG	AA	AA	AA	AA	GG
contig40347_202	A	G	GA	GG	GA	GA	GA	AA	AA	AA	GA	GG	GA	AA	AA	GG	GA	GA	AA	AA	GG	AA	GA	GA	GA	AA	GA	GA	AA	GG	AA	GA	AA	GA	AA	GA	AA	GA	GA	GA	GG	GA	AA	GG	AA	AA	AA	AA	GG
contig610444_93	C	T	TC	CC	TC	TC	TC	TT	TT	TT	TC	CC	TC	TT	TT	CC	TC	TC	TT	TT	CC	TT	TC	TC	TC	TT	TC	TC	TT	CC	TT	TC	TT	TC	TT	TC	TT	TC	TC	TC	CC	TC	TT	CC	TC	TT	TT	TT	CC
contig610444_33	T	G	GT	GG	GT	GT	GT	TT	TT	TT	GT	GG	GT	TT	TT	GG	GT	GT	TT	TT	GG	TT	GT	GT	GT	TT	GT	GT	TT	GG	TT	GT	TT	GT	TT	GT	TT	GT	GT	GT	GG	GT	TT	GG	GT	GT	TT	TT	GG
contig757018_68	C	T	CC	CC	TC	TC	CC	TC	TC	TC	TC	CC	CC	TC	TC	CC	TC	CC	TC	TC	CC	TC	TC	CC	TC	TC	CC	CC	TC	CC	TC	CC	TC	CC	TC	CC	TC	TC	TC	TC	CC	CC	TC	CC	TC	TC	TC	TC	CC
contig53009_88	G	A	GG	GG	AG	AG	GG	AG	AG	AG	AG	GG	GG	AG	AG	GG	AG	GG	AG	AG	GG	AG	AG	GG	AG	AG	GG	GG	AG	GG	AG	GG	AG	GG	AG	GG	AG	AG	AG	AG	GG	GG	AG	GG	GG	AG	AG	AG	GG
contig610444_11	G	A	AG	GG	GG	GG	AG	AG	AG	AG	GG	GG	AG	AG	AG	GG	GG	AG	AG	AG	GG	AG	GG	AG	GG	AG	AG	AG	AG	GG	AG	AG	AG	AG	AG	AG	AG	GG	GG	GG	GG	AG	AG	GG	GG	GG	GG	GG	GG
contig39865_96	A	G	AA	AA	GA	GA	AA	GA	GA	GA	GA	AA	AA	GA	GA	AA	GA	AA	GA	GA	AA	GA	GA	AA	GA	GA	AA	AA	GA	AA	GA	AA	GA	AA	GA	AA	GA	GA	GA	GA	AA	AA	GA	AA	GA	GA	GA	GA	AA
contig96070_28	G	C	CC	CC	GG	GG	CC	GG	GG	GG	CG	CC	CG	GG	GG	CC	CG	CG	GG	GG	CC	GG	CG	CG	CG	GG	CG	CG	GG	CC	GG	CG	GG	CG	GG	CC	GG	CG	GG	CG	CC	CG	GG	CC	GG	CG	GG	GG	CC
contig39865_119	G	A	GG	GG	AG	AG	GG	AG	AG	AG	AG	GG	GG	AG	AG	GG	AG	GG	AG	AG	GG	AG	AG	GG	AG	AG	GG	GG	AG	GG	AG	GG	AG	GG	AG	GG	AG	AG	AG	AG	GG	GG	AG	GG	AG	AG	AG	AG	GG
contig618527_101	G	A	GG	GG	AG	AG	GG	AG	AG	AG	AG	GG	GG	AG	AG	GG	AG	GG	AG	AG	GG	AG	AG	GG	AG	AG	GG	GG	AG	GG	AG	GG	AG	GG	AG	GG	AG	AG	AG	AG	GG	GG	AG	GG	AG	AG	AG	AG	GG
contig37072_174	T	C	TT	TT	CT	CT	TT	CT	CT	CT	CT	TT	TT	CT	CT	TT	CT	TT	CT	CT	TT	CT	CT	TT	CT	CT	TT	TT	CT	TT	CT	TT	CT	TT	CT	TT	CT	CT	CT	CT	TT	TT	CT	TT	CT	CT	CT	CT	TT
contig37072_96	G	T	GG	GG	TG	TG	GG	TG	TG	TG	TG	GG	GG	TG	TG	GG	TG	GG	TG	TG	GG	TG	TG	GG	TG	TG	GG	GG	TG	GG	TG	GG	TG	GG	TG	GG	TG	TG	TG	TG	GG	GG	TG	GG	TG	TG	TG	TG	GG
contig37072_6	C	T	CC	CC	CC	CC	TC	TC	TC	TC	CC	CC	TC	TC	TC	CC	CC	TC	TC	TC	CC	TC	CC	TC	CC	TC	TC	TC	TC	CC	TC	TC	TC	TC	TC	TC	TC	CC	CC	CC	CC	TC	TC	CC	CC	CC	CC	CC	CC
contig39865_114	C	A	CC	CC	AC	AC	CC	AC	AC	AC	AC	CC	CC	AC	AC	CC	AC	CC	AC	AC	CC	AC	AC	CC	AC	AC	CC	CC	AC	CC	AC	CC	AC	CC	AC	CC	AC	AC	AC	AC	CC	CC	AC	CC	AC	AC	AC	AC	CC
contig37072_86	T	C	TT	TT	TT	TT	CT	CT	CT	CT	TT	TT	CT	CT	CT	TT	TT	CT	CT	CT	TT	CT	TT	CT	TT	CT	CT	CT	CT	TT	CT	CT	CT	CT	CT	CT	CT	TT	TT	TT	TT	CT	CT	TT	CT	CT	CT	TT	TT
contig96070_49	G	A	GG	GG	AG	AG	GG	AG	AG	AG	AG	GG	GG	AG	AG	GG	AG	GG	AG	AG	GG	AG	AG	GG	AG	AG	GG	GG	AG	GG	AG	GG	AG	GG	AG	GG	AG	AG	GG	AG	GG	GG	AG	GG	AG	AG	AG	AG	GG
contig69636_17	C	G	GG	GG	GC	GC	GG	CC	CC	CC	GC	GG	GC	CC	CC	GG	GC	GC	CC	CC	GG	CC	GC	GC	GC	CC	GC	GC	CC	GG	CC	GC	CC	GC	CC	GC	CC	GC	GC	GC	GG	GC	CC	GG	GC	GC	GC	GC	GG
contig56016_100	A	T	TT	TT	TA	TA	TA	AA	AA	AA	TA	TT	TA	AA	AA	TT	TA	TA	AA	AA	TT	AA	TA	TA	TA	AA	TA	TA	AA	TT	AA	TA	AA	TA	AA	TA	AA	TA	TA	TA	TT	TA	AA	TT	TA	TA	TA	TA	TT
contig59198_121	G	A	GG	GG	AG	AG	GG	AG	AG	AG	AG	GG	GG	AG	AG	GG	AG	GG	AG	AG	GG	AG	AG	GG	AG	AG	GG	GG	AG	GG	AG	GG	AG	GG	AG	GG	AG	AG	AG	AG	GG	GG	AG	GG	AG	AG	AG	AG	GG
contig56016_150	A	G	AA	AA	GA	GA	GG	GG	GG	GG	GA	AA	GA	GG	GG	AA	GA	GA	GG	GG	AA	GG	GA	GA	GA	GG	GA	GA	GG	AA	GG	GA	GG	GA	GG	GA	GG	GA	GA	GA	AA	GA	GG	AA	GA	GA	GA	GA	AA
contig69636_13	T	C	TT	TT	TT	TT	TT	CT	CT	CT	TT	TT	CT	CT	CT	TT	TT	CT	CT	CT	TT	CT	TT	CT	TT	CT	CT	CT	CT	TT	CT	CT	CT	CT	CT	CT	CT	TT	TT	TT	TT	CT	CT	TT	CT	CT	CT	TT	TT
contig59198_106	C	T	CC	CC	CC	CC	TC	TC	TC	TC	CC	CC	TC	TC	TC	CC	CC	TC	TC	TC	CC	TC	CC	TC	CC	TC	TC	TC	TC	CC	TC	TC	TC	TC	TC	TC	TC	CC	CC	CC	CC	TC	TC	CC	TC	TC	TC	CC	CC
contig35598_7	C	T	CC	CC	TC	TC	TC	TT	TT	TT	TC	CC	TC	TT	TT	CC	TC	TC	TT	TT	CC	TT	TC	TC	TC	TT	TC	TC	TT	CC	TT	TC	TT	TC	TT	TC	TT	TC	TC	TC	CC	TC	TT	CC	TC	TC	TC	TC	CC
contig53009_100	C	T	CC	CC	CC	CC	TC	TC	TC	TC	CC	CC	TC	TC	TC	CC	CC	TC	TC	TC	CC	TC	CC	TC	CC	TC	TC	TC	TC	CC	TC	TC	TC	TC	TC	TC	TC	CC	CC	CC	CC	TC	TC	CC	TC	TC	TC	CC	CC
contig53009_203	G	A	GG	GG	GG	GG	AG	AG	AG	AG	GG	GG	AG	AG	AG	GG	GG	AG	AG	AG	GG	AG	GG	AG	GG	AG	AG	AG	AG	GG	AG	AG	AG	AG	AG	AG	AG	GG	GG	GG	GG	AG	AG	GG	AG	AG	AG	GG	GG
contig757018_11	A	G	AA	AA	AA	AA	GA	GA	GA	GA	AA	AA	GA	GA	GA	AA	AA	GA	GA	GA	AA	GA	AA	GA	AA	GA	GA	GA	GA	AA	GA	GA	GA	GA	GA	GA	GA	AA	AA	AA	AA	GA	GA	AA	AA	AA	AA	AA	AA
contig618527_103	A	T	TT	TT	TA	TA	AA	AA	AA	AA	TA	TT	TA	AA	AA	TT	TA	TA	AA	AA	TT	AA	TA	TA	TA	AA	TA	TA	AA	TT	AA	TA	AA	TA	AA	TA	AA	TT	TA	TT	TT	TA	AA	TT	TA	TA	TA	TA	TT
contig59198_115	C	T	TT	TT	TC	TC	TC	CC	CC	CC	TC	TT	TC	CC	CC	TT	TC	TC	CC	CC	TT	CC	TC	TC	TC	CC	TC	TC	CC	TT	CC	TC	CC	TC	CC	TC	CC	TC	TC	TC	TT	TC	CC	TT	TC	TC	TC	TC	TT
contig59198_126	A	G	GG	GG	GA	GA	GA	AA	AA	AA	GA	GG	GA	AA	AA	GG	GA	GA	AA	AA	GG	AA	GA	GA	GA	AA	GA	GA	AA	GG	AA	GA	AA	GA	AA	GA	AA	GA	GA	GA	GG	GA	AA	GG	AA	AA	AA	GA	GG
contig53009_29	G	T	GG	GG	GG	GG	TG	TG	TG	TG	GG	GG	TG	TG	TG	GG	GG	TG	TG	TG	GG	TG	GG	TG	GG	TG	TG	TG	TG	GG	TG	TG	TG	TG	TG	TG	TG	GG	GG	GG	GG	TG	TG	GG	GG	GG	GG	GG	GG
contig53009_83	T	C	TT	TT	TT	TT	CT	CT	CT	CT	TT	TT	CT	CT	CT	TT	TT	CT	CT	CT	TT	CT	TT	CT	TT	CT	CT	CT	CT	TT	CT	CT	CT	CT	CT	CT	CT	TT	TT	TT	TT	CT	CT	TT	TT	TT	TT	TT	TT
contig618527_72	A	G	AA	AA	AA	AA	GA	GA	GA	AA	AA	AA	GA	GA	GA	AA	AA	GA	GA	GA	AA	GA	AA	GA	AA	GA	GA	GA	GA	AA	GA	GA	GA	GA	GA	GA	GA	AA	AA	AA	AA	GA	GA	AA	AA	AA	AA	AA	AA
contig618527_123	C	T	CC	CC	CC	CC	TC	TC	TC	CC	CC	CC	TC	TC	TC	CC	CC	TC	TC	TC	CC	TC	CC	TC	CC	TC	TC	TC	TC	CC	TC	TC	TC	TC	TC	TC	TC	CC	CC	CC	CC	TC	TC	CC	CC	CC	CC	CC	CC
contig53009_198	G	A	GG	GG	GG	GG	AG	AG	AG	AG	GG	GG	AG	AG	AG	GG	GG	AG	AG	AG	GG	AG	GG	AG	GG	AG	AG	AG	AG	GG	AG	AG	AG	AG	AG	AG	AG	GG	GG	GG	GG	AG	AG	GG	GG	GG	GG	GG	GG
contig485643_81	G	A	GG	GG	GG	GG	AG	AG	AG	AG	GG	GG	AG	AG	AG	GG	GG	AG	AG	AG	GG	AG	GG	AG	GG	AG	AG	AG	GG	GG	AG	AG	AG	AG	AG	AG	AG	GG	GG	GG	GG	AG	AG	GG	GG	GG	GG	GG	GG
contig40453_168	T	A	TT	TT	TT	AT	TT	AT	AT	AT	AT	TT	TT	AT	AT	TT	AT	TT	AT	AT	TT	AT	AT	TT	AT	AT	TT	TT	AT	TT	AT	TT	AT	TT	AT	TT	AT	AT	AT	AT	TT	TT	AT	TT	AT	AT	AT	AT	TT
contig40453_41	A	G	AA	AA	AA	GA	AA	GA	GA	GA	GA	AA	AA	GA	GA	AA	GA	AA	GA	GA	AA	GA	GA	AA	GA	GA	AA	AA	GA	AA	GA	AA	GA	AA	GA	AA	GA	GA	GA	GA	AA	AA	GA	AA	GA	GA	GA	GA	AA
contig485643_61	T	C	CC	CC	CC	CT	CT	TT	TT	TT	CT	CC	CT	TT	TT	CC	CT	CT	TT	TT	CC	TT	CT	CT	CT	TT	CT	CT	CT	CC	TT	CT	TT	CT	TT	CT	TT	CT	CT	CT	CC	CT	TT	CC	TT	TT	CT	CT	CC
contig665944_92	G	A	GG	GG	GG	AG	GG	AG	AG	AG	AG	GG	GG	AG	AG	GG	AG	GG	AG	AG	GG	AG	AG	GG	AG	AG	GG	GG	AG	GG	AG	GG	AG	GG	AG	GG	AG	AG	AG	AG	GG	GG	AG	GG	AG	AG	AG	AG	GG
contig40453_145	T	C	TT	TT	TT	TT	CT	CT	CT	CT	TT	TT	CT	CT	CT	TT	TT	CT	CT	CT	TT	CT	TT	CT	TT	CT	CT	CT	TT	TT	CT	CT	CT	CT	CT	CT	CT	TT	TT	TT	TT	CT	CT	TT	TT	CT	TT	TT	TT
contig63905_124	C	T	CC	CC	CC	CC	TC	TC	TC	TC	CC	CC	TC	TC	TC	CC	CC	TC	TC	TC	CC	TC	CC	TC	CC	TC	TC	TC	CC	CC	TC	TC	TC	TC	TC	TC	TC	CC	CC	CC	CC	CC	TC	CC	CC	TC	CC	CC	CC
contig485643_60	C	T	CC	CC	CC	TC	CC	TC	TC	TC	TC	CC	CC	TC	TC	CC	TC	CC	TC	TC	CC	TC	TC	CC	TC	TC	CC	CC	TC	CC	TC	CC	TC	CC	TC	CC	TC	TC	TC	TC	CC	CC	TC	CC	TC	TC	TC	TC	CC
contig63905_259	T	C	CC	CC	CC	CT	CT	TT	TT	TT	CT	CC	CT	TT	TT	CC	CT	CT	TT	TT	CC	TT	CT	CT	CT	TT	CT	CT	CT	CC	TT	CT	TT	CT	TT	CT	TT	CT	CT	CT	CC	CC	TT	CC	CT	CT	CT	CT	CC
contig63905_51	G	A	GG	GG	GG	GG	AG	AG	AG	AG	GG	GG	AG	AG	AG	GG	GG	AG	AG	AG	GG	AG	GG	AG	GG	AG	AG	AG	GG	GG	AG	AG	AG	AG	AG	AG	AG	GG	GG	GG	GG	GG	AG	GG	AG	AG	GG	GG	GG
contig63905_299	C	T	TT	TT	TT	TC	TC	CC	CC	CC	TC	TT	TC	CC	CC	TT	TC	TC	CC	CC	TT	CC	TC	TC	TC	CC	TC	TC	TC	TT	CC	TC	CC	TC	CC	TC	CC	TC	TC	TC	TT	TT	CC	TT	TC	TC	TC	TC	TT
contig28989_121	A	G	AA	AA	AA	AA	GA	AA	GA	GA	AA	AA	GA	GA	GA	AA	AA	GA	GA	GA	AA	GA	AA	GA	AA	GA	GA	AA	AA	AA	GA	GA	GA	GA	GA	GA	GA	AA	AA	AA	AA	GA	GA	AA	GA	GA	AA	AA	AA
contig425764_139	C	A	CC	CC	CC	AC	AC	AA	AA	AA	AC	CC	AC	AA	AA	CC	AC	AC	AA	AA	CC	AA	CC	AC	AC	AA	AC	CC	AC	CC	AA	AC	AA	AA	AA	AC	AA	AC	AC	AC	CC	AC	AA	CC	AC	AC	AC	AC	CC
contig425764_138	T	A	TT	TT	TT	AT	AT	TT	AA	AA	AT	TT	AT	AA	AA	TT	AT	AT	AA	AA	TT	AA	TT	AT	AT	AA	AT	TT	AT	TT	AA	AT	AA	AA	AA	AT	AA	AT	AT	AT	TT	AT	AA	TT	AT	AT	AT	AT	TT
contig7341_84	G	A	GG	GG	GG	GG	AG	GG	AG	AG	GG	GG	AG	AG	AG	GG	GG	AG	AG	AG	GG	AG	GG	AG	GG	AG	AG	GG	GG	GG	AG	AG	AG	AG	AG	AG	AG	GG	GG	GG	GG	AG	AG	GG	AG	AG	AG	GG	GG
contig62370_116	T	A	TT	TT	TT	AT	TT	AT	AT	AT	AT	TT	TT	AT	AT	TT	AT	TT	AT	AT	TT	AT	TT	TT	AT	AT	TT	TT	AT	TT	AT	TT	AT	AT	AT	TT	AT	AT	AT	AT	TT	TT	AT	TT	AT	TT	TT	AT	TT
contig599924_88	C	T	CC	CC	CC	CC	TC	CC	TC	TC	CC	CC	TC	TC	TC	CC	CC	TC	TC	TC	CC	TC	CC	TC	CC	TC	TC	CC	CC	CC	TC	TC	TC	TC	TC	TC	TC	CC	CC	CC	CC	TC	TC	CC	TC	TC	TC	CC	CC
contig8293_68	A	G	AA	AA	AA	AA	GA	AA	GA	GA	AA	AA	GA	GA	GA	AA	AA	GA	GA	GA	AA	GA	AA	GA	AA	GA	GA	AA	AA	AA	GA	GA	GA	GA	GA	GA	GA	AA	AA	AA	AA	GA	GA	AA	GA	GA	GA	AA	AA
contig59954_166	T	C	TT	TT	TT	TT	CT	TT	CT	CT	TT	TT	CT	CT	CT	TT	TT	CT	CT	CT	TT	CT	TT	CT	TT	CT	CT	TT	TT	TT	CT	CT	CT	CT	CT	CT	CT	TT	TT	TT	TT	CT	CT	TT	CT	CT	CT	TT	TT
contig59954_112	T	C	TT	TT	TT	TT	CT	TT	CT	CT	TT	TT	CT	CT	CT	TT	TT	CT	CT	CT	TT	CT	TT	CT	TT	CT	CT	TT	TT	TT	CT	CT	CT	CT	CT	CT	CT	TT	TT	TT	TT	CT	CT	TT	CT	CT	TT	TT	TT
contig8293_242	G	A	GG	GG	GG	GG	AG	GG	AG	AG	GG	GG	AG	AG	AG	GG	GG	AG	AG	AG	GG	AG	GG	AG	GG	AG	AG	GG	GG	GG	AG	AG	AG	AG	AG	AG	AG	GG	GG	GG	GG	AG	AG	GG	AG	AG	AG	GG	GG
contig8293_156	T	A	TT	TT	TT	TT	AT	TT	AT	AT	TT	TT	AT	AT	AT	TT	TT	AT	AT	AT	TT	AT	TT	AT	TT	AT	AT	TT	TT	TT	AT	AT	AT	AT	AT	AT	AT	TT	TT	TT	TT	AT	AT	TT	AT	AT	AT	TT	TT
contig62370_145	A	G	AA	AA	AA	AA	GA	AA	GA	GA	AA	AA	GA	GA	GA	AA	AA	GA	GA	GA	AA	GA	AA	GA	AA	GA	GA	AA	AA	AA	GA	GA	GA	GA	GA	GA	GA	AA	AA	AA	AA	GA	GA	AA	GA	GA	GA	AA	AA
contig62370_216	T	A	TT	TT	TT	AT	TT	AT	AT	AT	AT	TT	TT	AT	AT	TT	AT	TT	AT	AT	TT	AT	TT	TT	AT	AT	TT	TT	AT	TT	AT	TT	AT	AT	AT	TT	AT	AT	AT	AT	TT	TT	AT	TT	AT	AT	AT	AT	TT
contig599924_85	G	A	GG	GG	GG	GG	AG	GG	AG	AG	GG	GG	AG	AG	AG	GG	GG	AG	AG	AG	GG	AG	GG	AG	GG	AG	AG	GG	GG	GG	AG	AG	AG	AG	AG	AG	AG	GG	GG	GG	GG	AG	AG	GG	AG	AG	AG	GG	GG
contig649044_85	G	A	GG	GG	GG	GG	AG	GG	AG	AG	GG	GG	AG	AG	AG	GG	GG	AG	AG	AG	GG	AG	GG	AG	GG	AG	AG	GG	GG	GG	AG	AG	AG	AG	AG	AG	AG	GG	GG	GG	GG	AG	AG	GG	AG	AG	AG	GG	GG
contig62370_117	G	A	GG	GG	GG	AG	GG	AG	AG	AG	AG	GG	GG	AG	AG	GG	AG	GG	AG	AG	GG	AG	GG	GG	AG	AG	GG	GG	AG	GG	AG	GG	AG	AG	AG	GG	AG	AG	AG	AG	GG	GG	AG	GG	AG	AG	AG	AG	GG
contig62370_3	T	C	CC	CC	CC	CT	CT	CT	TT	TT	CT	CC	CT	TT	TT	CC	CT	CT	TT	TT	CC	TT	CC	CT	CT	TT	CT	CC	CT	CC	TT	CT	TT	TT	TT	CT	TT	CT	CT	CT	CC	CT	TT	CC	TT	TT	TT	CT	CC
contig60908_117	G	A	AA	AA	AA	AG	AA	AG	GG	GG	AG	AA	AG	GG	GG	AA	AG	AG	GG	GG	AA	GG	AA	AG	AG	GG	AG	AA	AG	AA	GG	AG	GG	GG	GG	AG	GG	AG	AG	AG	AA	AG	GG	AA	GG	GG	GG	AG	AA
contig7341_17	G	A	AA	AA	AA	AG	AG	AG	GG	GG	AG	AA	AG	GG	GG	AA	AG	AG	GG	GG	AA	GG	AA	AG	AG	GG	AG	AA	AG	AA	GG	AG	GG	GG	GG	AG	GG	AG	AG	AG	AA	AG	GG	AA	GG	GG	GG	AG	AA
contig700859_85	G	A	GG	GG	GG	AG	GG	AG	AG	AG	AG	GG	GG	AG	AG	GG	AG	GG	AG	AG	GG	AG	GG	GG	AG	AG	GG	GG	AG	GG	AG	GG	AG	AG	AG	GG	AG	AG	AG	AG	GG	GG	AG	GG	AG	AG	AG	AG	GG
contig60908_90	G	A	AA	AA	AA	AG	AA	AG	GG	GG	AG	AA	AG	GG	GG	AA	AG	AG	GG	GG	AA	GG	AA	AG	AG	GG	AG	AA	AG	AA	GG	AG	GG	GG	GG	AG	GG	AG	AG	AG	AA	AG	GG	AA	GG	GG	GG	AG	AA
contig7341_14	A	C	AA	AA	AA	CA	AA	CA	CA	CA	CA	AA	AA	CA	CA	AA	CA	AA	CA	CA	AA	CA	AA	AA	CA	CA	AA	AA	CA	AA	CA	AA	CA	CA	CA	AA	CA	CA	CA	CA	AA	AA	CA	AA	CA	CA	CA	CA	AA
contig60908_93	C	T	TT	TT	TT	TT	TT	TC	CC	CC	TC	TT	TC	CC	CC	TT	TC	TC	CC	CC	TT	CC	TT	TC	TC	CC	TC	TT	TC	TT	CC	TC	CC	CC	CC	TC	CC	TC	TC	TC	TT	TC	CC	TT	CC	CC	CC	TC	TT
contig7341_175	C	T	CC	CC	CC	TC	TC	TC	TT	TT	TC	CC	TC	TT	TT	CC	TC	TC	TT	TT	CC	TT	CC	TC	TC	TT	TC	CC	TC	CC	TT	TC	TT	TT	TT	TC	TT	TC	TC	TC	CC	TC	TT	CC	TT	TT	TT	TC	CC
contig7341_122	T	C	CC	CC	CC	CT	CT	CT	TT	TT	CT	CC	CT	TT	TT	CC	CT	CT	TT	TT	CC	TT	CC	CT	CT	TT	CT	CC	CT	CC	TT	CT	TT	TT	TT	CT	TT	CT	CT	CT	CC	CT	TT	CC	TT	TT	TT	CT	CC
contig7341_9	A	G	GG	GG	GG	GA	GA	GA	AA	AA	GA	GG	GA	AA	AA	GG	GA	GA	AA	AA	GG	AA	GG	GA	GA	AA	GA	GG	GA	GG	AA	GA	AA	AA	AA	GA	AA	GA	GA	GA	GG	GA	AA	GG	AA	AA	AA	GA	GG
contig60908_21	A	C	AA	AA	AA	AA	AA	CA	CA	CA	CA	AA	AA	CA	CA	AA	CA	AA	CA	CA	AA	CA	AA	AA	CA	CA	AA	AA	CA	AA	CA	AA	CA	CA	CA	AA	CA	CA	CA	CA	AA	AA	CA	AA	AA	AA	AA	CA	AA
contig8293_63	G	A	AA	AA	AA	AG	AG	AG	GG	GG	AG	AA	AG	GG	GG	AA	AG	AG	GG	GG	AA	GG	AA	AG	AG	GG	AG	AA	AG	AA	GG	AG	GG	GG	GG	AG	GG	AG	AG	AG	AA	AG	GG	AA	GG	GG	GG	AG	AA
contig8293_125	A	T	TT	TT	TT	TA	TA	TA	AA	AA	TA	TT	TA	AA	AA	TT	TA	TA	AA	AA	TT	AA	TT	TA	TA	AA	TA	TT	TA	TT	AA	TA	AA	AA	AA	TA	AA	TA	TA	TA	TT	TA	AA	TT	AA	AA	AA	TA	TT
contig59954_128	C	A	AA	AA	AA	AC	AC	AC	CC	CC	AC	AA	AC	CC	CC	AA	AC	AC	CC	CC	AA	CC	AA	AC	AC	CC	AC	AA	AC	AA	CC	AC	CC	CC	CC	AC	CC	AC	AC	AC	AA	AC	CC	AA	AC	AC	AC	AC	AA
contig8293_194	C	T	TT	TT	TT	TC	TC	TC	CC	CC	TC	TT	TC	CC	CC	TT	TC	TC	CC	CC	TT	CC	TT	TC	TC	CC	TC	TT	TC	TT	CC	TC	CC	CC	CC	TC	CC	TC	TC	TC	TT	TC	CC	TT	TC	TC	TC	TC	TT
contig59954_154	A	T	AA	AA	AA	TA	AA	TA	TA	TA	TA	AA	AA	TA	TA	AA	TA	AA	TA	TA	AA	TA	AA	AA	TA	TA	AA	AA	TA	AA	TA	AA	TA	TA	TA	AA	TA	TA	TA	TA	AA	AA	TA	AA	TA	TA	TA	TA	AA
contig8293_44	T	C	CC	CC	CC	CT	CT	CT	TT	TT	CT	CC	CT	TT	TT	CC	CT	CT	TT	TT	CC	TT	CC	CT	CT	TT	CT	CC	CT	CC	TT	CT	TT	TT	TT	CT	TT	CT	CT	CT	CC	CT	TT	CC	CT	CT	CT	CT	CC
contig8293_137	C	T	CC	CC	CC	TC	CC	TC	TC	TC	TC	CC	CC	TC	TC	CC	TC	CC	TC	TC	CC	TC	CC	CC	TC	TC	CC	CC	TC	CC	TC	CC	TC	TC	TC	CC	TC	TC	TC	TC	CC	CC	TC	CC	TC	TC	TC	TC	CC
contig634491_123	C	T	CC	CC	CC	TC	TC	TC	TT	TT	TC	CC	TC	TT	TT	CC	TC	TC	TT	TT	CC	TT	CC	TC	TC	TT	TC	CC	TC	CC	TT	TC	TT	TT	TT	TC	TT	TC	TC	TC	CC	TC	TT	CC	TC	TC	TC	TC	CC
contig56726_46	C	A	CC	CC	CC	CC	AC	CC	AC	AC	CC	CC	AC	AC	AC	CC	CC	AC	AC	AC	CC	AC	CC	AC	CC	AC	AC	CC	CC	CC	AC	AC	AC	AC	AC	AC	AC	CC	CC	CC	CC	AC	AC	CC	AC	AC	AC	CC	CC
contig837643_47	T	A	TT	TT	TT	TT	AT	TT	AT	AT	TT	TT	AT	AT	AT	TT	TT	AT	AT	AT	TT	AT	TT	AT	TT	AT	AT	TT	TT	TT	AT	AT	AT	AT	AT	AT	AT	TT	TT	TT	TT	AT	AT	TT	AT	AT	AT	TT	TT
contig28989_146	G	A	GG	GG	GG	AG	GG	AG	AG	AG	AG	GG	GG	AG	AG	GG	AG	GG	AG	AG	GG	AG	GG	GG	AG	AG	GG	GG	AG	GG	AG	GG	AG	AG	AG	GG	AG	AG	AG	AG	GG	GG	AG	GG	AG	AG	AG	AG	GG
contig837643_150	G	T	GG	GG	GG	TG	GG	TG	TG	TG	TG	GG	GG	TG	TG	GG	TG	GG	TG	TG	GG	TG	GG	GG	TG	TG	GG	GG	TG	GG	TG	GG	TG	TG	TG	GG	TG	TG	TG	TG	GG	GG	TG	GG	TG	TG	TG	TG	GG
contig39914_26	T	C	TT	TT	TT	TT	CT	TT	CT	CT	TT	TT	CT	CT	CT	TT	TT	CT	CT	CT	TT	CT	TT	CT	TT	CT	CT	TT	TT	TT	CT	CT	CT	CT	CT	CT	CT	TT	TT	TT	TT	CT	CT	TT	CT	CT	CT	TT	TT
contig837643_146	T	C	TT	TT	TT	TT	CT	TT	CT	CT	TT	TT	CT	CT	CT	TT	TT	CT	CT	CT	TT	CT	TT	CT	TT	CT	CT	TT	TT	TT	CT	CT	CT	CT	CT	CT	CT	TT	TT	TT	TT	CT	CT	TT	TT	TT	TT	TT	TT
contig837643_22	G	A	GG	GG	GG	AG	AG	GG	AA	AA	AG	GG	AG	AA	AA	GG	AG	AG	AA	AA	GG	AA	GG	AG	GG	AA	AG	GG	AG	GG	AA	AG	AA	AA	AA	GG	AA	AG	GG	AG	GG	AG	AA	GG	GG	GG	GG	AG	GG
contig28989_39	G	T	GG	GG	GG	TG	GG	TG	TG	TG	TG	GG	GG	TG	TG	GG	TG	GG	TG	TG	GG	TG	GG	GG	TG	TG	GG	GG	TG	GG	TG	GG	TG	TG	TG	GG	TG	TG	TG	TG	GG	GG	TG	GG	GG	GG	GG	TG	GG
contig837643_134	C	G	CC	CC	CC	GC	CC	GC	GC	GC	GC	CC	CC	GC	GC	CC	GC	CC	GC	GC	CC	GC	CC	CC	GC	GC	CC	CC	GC	CC	GC	CC	GC	GC	GC	CC	GC	GC	GC	GC	CC	CC	GC	CC	CC	CC	CC	GC	CC
contig837643_130	T	A	AA	AA	AA	AT	AT	AT	TT	TT	AT	AA	AT	TT	TT	AA	AT	AT	TT	TT	AA	TT	AA	AT	AT	TT	AT	AA	AT	AA	TT	AT	TT	TT	TT	AA	TT	AT	AT	AT	AA	AT	TT	AA	TT	TT	TT	AT	AA
contig837643_155	T	C	CC	CC	CC	CT	CT	CT	TT	TT	CT	CC	CT	TT	TT	CC	CT	CT	TT	TT	CC	TT	CC	CT	CT	TT	CT	CC	CT	CC	TT	CT	TT	TT	TT	CT	TT	CT	CT	CT	CC	CT	TT	CC	TT	TT	TT	CT	CC
contig837643_177	G	A	AA	AA	AA	AG	AG	AG	GG	GG	AG	AA	AG	GG	GG	AA	AG	AG	GG	GG	AA	GG	AA	AG	GG	GG	AG	AA	AG	AA	GG	AG	GG	GG	GG	AA	GG	AG	GG	AG	AA	AG	GG	AA	GG	GG	GG	AG	AA
contig56726_56	C	T	CC	CC	CC	TC	CC	TC	TC	TC	TC	CC	CC	TC	TC	CC	TC	CC	TC	TC	CC	TC	CC	CC	TC	TC	CC	CC	TC	CC	TC	CC	TC	TC	TC	CC	TC	TC	TC	CC	CC	CC	TC	CC	TC	TC	TC	CC	CC
contig39914_107	A	C	CC	CC	CC	CA	CA	CA	AA	AA	CA	CC	CA	AA	AA	CC	CA	CA	AA	AA	CC	AA	CC	CA	CA	AA	CA	CC	AA	CC	AA	CA	AA	AA	AA	CA	AA	CA	CA	CC	CC	CA	AA	CC	AA	AA	AA	CC	CC
contig737286_90	T	C	TT	TT	TT	CT	TT	CC	CT	CT	CT	TT	TT	CT	CT	TT	CC	TT	CT	CT	TT	CT	TT	TT	CT	CT	TT	TT	CT	TT	CT	TT	CT	CT	CT	TT	CT	CT	CT	TT	TT	TT	CT	TT	CC	CC	CC	TT	TT
contig39914_75	G	A	GG	GG	GG	AG	AG	AG	AA	AA	AG	GG	AG	AA	AA	GG	AG	AG	AA	AA	GG	AA	GG	AG	AG	AA	AG	GG	AA	GG	AA	AG	AA	AA	AA	AG	AA	AG	AG	GG	GG	AG	AA	GG	AA	AA	AA	GG	GG
contig627851_95	A	G	AA	AA	AA	GA	AA	GA	GA	GA	GA	AA	AA	GA	GA	AA	GA	AA	GA	GA	AA	GA	AA	AA	GA	GA	AA	AA	GA	AA	GA	AA	GA	GA	GA	AA	GA	GA	GA	AA	AA	AA	GA	AA	GA	GA	GA	AA	AA
contig40276_152	A	C	AA	AA	AA	CA	AA	CA	CA	CA	CA	AA	AA	CA	CA	AA	CA	AA	CA	CA	AA	CA	AA	AA	CA	CA	AA	AA	CA	AA	CA	AA	CA	CA	CA	AA	CA	CA	CA	AA	AA	AA	CA	AA	CA	CA	CA	AA	AA
contig40276_119	G	A	GG	GG	GG	AG	GG	AG	AG	AG	AG	GG	GG	AG	AG	GG	AG	GG	AG	AG	GG	AG	GG	GG	AG	AG	GG	GG	AG	GG	AG	GG	AG	AG	AG	GG	AG	AG	AG	GG	GG	GG	AG	GG	AG	AG	AG	GG	GG
contig388122_52	A	C	AA	AA	AA	CA	AA	CA	CA	CA	CA	AA	AA	CA	CA	AA	CA	AA	CA	CA	AA	CA	AA	AA	CA	CA	AA	AA	CA	AA	CA	AA	CA	CA	CA	AA	CA	CA	CA	AA	AA	AA	CA	AA	CA	CA	CA	AA	AA
contig39914_22	C	T	CC	CC	CC	TC	CC	TC	TC	TC	TC	CC	CC	TC	TC	CC	TC	CC	TC	TC	CC	TC	CC	CC	TC	TC	CC	CC	TC	CC	TC	CC	TC	TC	TC	CC	TC	TC	TC	CC	CC	CC	TC	CC	TC	TC	TC	CC	CC
contig737286_62	T	C	TT	TT	TT	CT	TT	CC	CT	CT	CT	TT	TT	CT	CT	TT	CC	TT	CT	CT	TT	CT	TT	TT	CT	CT	TT	TT	CT	TT	CT	TT	CT	CT	CT	TT	CT	CT	CT	TT	TT	TT	CT	TT	CC	CC	CC	TT	TT
contig73187_17	T	A	TT	TT	TT	AT	TT	AT	AT	AT	AT	TT	TT	AT	AT	TT	AT	TT	AT	AT	TT	AT	TT	TT	AT	AT	TT	TT	AT	TT	AT	TT	AT	AT	AT	TT	AT	AT	AT	TT	TT	TT	AT	TT	AT	AT	AT	TT	TT
contig39914_86	T	C	TT	TT	TT	CT	TT	CT	CT	CT	CT	TT	TT	CT	CT	TT	CT	TT	CT	CT	TT	CT	TT	TT	CT	CT	TT	TT	CT	TT	CT	TT	CT	CT	CT	TT	CT	CT	CT	TT	TT	TT	CT	TT	CT	CT	CT	TT	TT
contig10493_37	G	A	GG	GG	GG	AG	GG	AG	AG	AG	AG	GG	GG	AG	AG	GG	AG	GG	AG	AG	GG	AG	GG	GG	AG	AG	GG	GG	AG	GG	AG	GG	AG	AG	AG	GG	AG	AG	AG	GG	GG	GG	AG	GG	AG	AG	AG	GG	GG
contig627851_140	G	A	GG	GG	GG	AG	GG	AG	AG	AG	AG	GG	GG	AG	AG	GG	AG	GG	AG	AG	GG	AG	GG	GG	AG	AG	GG	GG	AG	GG	AG	GG	AG	AG	AG	GG	AG	AG	AG	GG	GG	GG	AG	GG	GG	AG	AG	GG	GG
contig582418_78	A	C	AA	CA	AA	CA	CA	CA	CC	CC	CA	AA	CA	CC	CC	AA	CA	CA	CC	CC	AA	CC	AA	CA	AA	CC	CA	AA	CA	AA	CC	CA	CC	CC	CC	AA	CC	CA	CA	AA	AA	CA	CC	AA	CA	CA	CA	AA	AA
contig582418_49	G	C	CC	CG	CC	CG	CG	CG	GG	GG	CG	CC	CG	GG	GG	CC	CG	CG	GG	GG	CC	GG	CC	CG	CC	GG	CG	CC	CG	CC	GG	CG	GG	GG	GG	CC	GG	CG	CG	CC	CC	CG	GG	CC	CG	CG	CG	CC	CC
contig88920_203	G	A	GG	AG	GG	GG	AG	GG	AG	AG	GG	GG	AG	AG	GG	GG	GG	AG	AG	AG	GG	AG	GG	AG	GG	GG	AG	GG	GG	AG	AG	AG	AG	AG	AG	AG	AG	GG	GG	GG	GG	AG	AG	GG	AG	AG	AG	GG	GG
contig10892_90	C	T	CC	TC	CC	CC	TC	CC	TC	TC	CC	CC	TC	TC	TC	CC	CC	TC	TC	TC	CC	TC	CC	TC	CC	TC	TC	CC	CC	TC	TC	TC	TC	TC	TC	TC	TC	CC	CC	CC	CC	TC	TC	CC	TC	TC	TC	CC	CC
contig68016_204	T	A	TT	AT	TT	AT	AT	AT	AA	AA	AT	TT	AT	AA	AA	TT	AT	AT	AA	AA	TT	AA	TT	AT	AA	AA	AT	TT	AT	AT	AA	AT	AA	AA	AA	AT	AA	AT	AT	TT	TT	AT	AA	TT	AT	AT	AT	TT	TT
contig737286_72	A	T	TT	TA	TT	TA	TA	AA	AA	AA	TA	TT	TA	AA	AA	TT	AA	TA	AA	AA	TT	AA	TT	TA	TA	AA	TA	TT	TA	TA	AA	TA	AA	AA	AA	TA	AA	TA	TA	TT	TT	TA	AA	TT	TA	TA	TA	TT	TT
contig40276_193	C	T	TT	TC	TT	TC	TC	TC	CC	CC	TC	TT	TC	CC	CC	TT	TC	TC	CC	CC	TT	CC	TT	TC	TC	CC	TC	TT	TC	TC	CC	TC	CC	CC	CC	TC	CC	TC	TC	TT	TT	TC	CC	TT	TC	TC	CC	TT	TT
contig288878_138	A	T	AA	TA	AA	AA	TA	AA	TA	TA	AA	AA	TA	TA	TA	AA	AA	TA	TA	TA	AA	TA	AA	TA	AA	TA	TA	AA	AA	TA	TA	TA	TA	TA	TA	TA	TA	AA	AA	AA	AA	TA	TA	AA	TA	TA	TA	AA	AA
contig737286_71	A	T	TT	TA	TT	TA	TA	AA	AA	AA	TA	TT	TA	AA	AA	TT	AA	TA	AA	AA	TT	AA	TT	TA	TA	AA	TA	TT	TA	TA	AA	TA	AA	AA	AA	TA	AA	TA	TA	TT	TT	AA	AA	TT	AA	TA	AA	TT	TT
contig20880_278	C	T	CC	TC	CC	CC	TC	CC	TC	TC	CC	CC	TC	TC	TC	CC	CC	TC	TC	TC	CC	TC	CC	TC	CC	TC	TC	CC	CC	TC	TC	TC	TC	TC	TC	TC	TC	CC	CC	CC	CC	TC	TC	CC	TC	CC	TC	CC	CC
contig40276_154	A	G	AA	GA	AA	AA	GA	AA	GA	GA	AA	AA	GA	GA	GA	AA	AA	GA	GA	GA	AA	GA	AA	GA	AA	GA	GA	AA	AA	GA	GA	GA	GA	GA	GA	GA	GA	AA	AA	AA	AA	GA	GA	AA	GA	GA	GA	AA	AA
contig288878_204	G	C	GG	CG	GG	GG	CG	GG	CG	CG	GG	GG	CG	CG	CG	GG	GG	CG	CG	CG	GG	CG	GG	CG	GG	CG	CG	GG	GG	CG	CG	CG	CG	CG	CG	CG	CG	GG	GG	GG	GG	CG	CG	GG	CG	CG	CG	GG	GG
contig10010_145	G	A	GG	AG	GG	GG	AG	GG	AG	AG	GG	GG	AG	AG	AG	GG	GG	AG	AG	AG	GG	AG	GG	AG	GG	AG	AG	GG	GG	AG	AG	AG	AG	AG	AG	AG	AG	GG	GG	GG	GG	AG	AG	GG	AG	AG	AG	GG	GG
contig20880_206	C	T	CC	TC	CC	CC	TC	CC	TC	TC	CC	CC	TC	TC	TC	CC	CC	TC	TC	TC	CC	TC	CC	TC	CC	TC	TC	CC	CC	TC	TC	TC	TC	TC	TC	TC	TC	CC	CC	CC	CC	TC	TC	CC	TC	CC	TC	CC	CC
contig68016_205	C	A	CC	AC	CC	AC	AC	AC	AA	AA	AC	CC	AC	AA	AA	CC	CC	AA	AA	AA	CC	AA	CC	AC	AA	AA	AA	CC	AC	AC	AA	AC	AA	AA	AA	AC	AA	AC	AC	CC	CC	AC	AA	CC	AA	AC	AA	CC	CC
contig68016_186	C	T	TT	TC	TT	TC	TC	TC	CC	CC	TC	TT	TC	CC	CC	TT	TT	CC	CC	CC	TT	CC	TT	CC	CC	CC	CC	TT	TC	TC	CC	TC	CC	CC	CC	TC	CC	TC	TC	TT	TT	TC	CC	TT	CC	TC	CC	TT	TT
contig288878_139	C	T	CC	TC	CC	CC	TC	CC	TC	TC	CC	CC	TC	TC	TC	CC	CC	TC	TC	TC	CC	TC	CC	TC	CC	TC	TC	CC	CC	TC	TC	TC	TC	TC	TC	TC	TC	CC	CC	CC	CC	TC	TC	CC	TC	TC	TC	CC	CC
contig20880_141	A	C	AA	CA	AA	AA	CA	AA	CA	CA	AA	AA	CA	CA	CA	AA	AA	CA	CA	CA	AA	CA	AA	CA	AA	CA	CA	AA	AA	CA	CA	CA	CA	CA	CA	CA	CA	AA	AA	AA	AA	CA	CA	AA	CA	AA	CA	AA	AA
contig68016_202	A	G	GG	GA	GG	GA	GA	GA	AA	AA	GA	GG	GA	AA	AA	GG	GG	AA	AA	AA	GG	AA	GG	GA	AA	AA	AA	GG	GA	GA	AA	GA	AA	AA	AA	GA	AA	GA	GA	GG	GG	GA	AA	GG	AA	GA	AA	GG	GG
contig40276_71	A	G	AA	GA	AA	AA	GA	AA	GA	GA	AA	AA	GA	GA	GA	AA	AA	GA	GA	GA	AA	GA	AA	GA	AA	GA	GA	AA	AA	GA	GA	GA	GA	GA	GA	GA	GA	AA	AA	AA	AA	GA	GA	AA	GA	AA	GA	AA	AA
contig10010_57	G	A	GG	AG	GG	GG	AG	GG	AG	AG	GG	GG	AG	AG	AG	GG	GG	AG	AG	AG	GG	AG	GG	AG	GG	AG	AG	GG	GG	AG	AG	AG	AG	AG	AG	AG	AG	GG	GG	GG	GG	AG	AG	GG	AG	GG	AG	GG	GG
contig20880_269	C	T	CC	TC	CC	CC	TC	CC	TC	TC	CC	CC	TC	TC	TC	CC	CC	TC	TC	TC	CC	TC	TC	TC	CC	TC	TC	CC	CC	TC	TC	TC	TC	TC	TC	TC	TC	CC	CC	CC	CC	TC	TC	CC	TC	CC	TC	CC	CC
contig48103_158	C	T	CC	CC	CC	TC	CC	TC	CC	TC	TC	CC	CC	TC	TC	CC	TC	CC	TC	TC	CC	TC	CC	CC	TC	TC	CC	CC	TC	CC	TC	CC	TC	TC	TC	CC	TC	TC	TC	CC	CC	CC	TC	CC	CC	CC	TC	CC	CC
contig20880_260	C	T	CC	CC	CC	TC	CC	TC	CC	TC	TC	CC	CC	TC	TC	CC	TC	CC	TC	TC	CC	TC	CC	CC	TC	TC	CC	CC	TC	CC	TC	CC	TC	TC	TC	CC	TC	TC	TC	CC	CC	CC	TC	CC	CC	CC	TC	CC	CC
contig20880_165	A	G	AA	AA	AA	GA	AA	GA	AA	GA	GA	AA	AA	GA	GA	AA	GA	AA	GA	GA	AA	GA	AA	AA	GA	GA	AA	AA	GA	AA	GA	AA	GA	GA	GA	AA	GA	GA	GA	AA	AA	AA	GA	AA	AA	AA	GA	AA	AA
contig73187_253	C	T	TT	TC	TT	TC	TC	TC	TC	CC	TC	TT	TC	CC	CC	TT	TC	TC	CC	CC	TT	CC	TT	TC	TC	CC	TC	TT	TC	TC	CC	TC	CC	CC	CC	TC	CC	TC	TC	TT	TT	TC	CC	TT	CC	TT	CC	TT	TT
contig88920_128	C	T	TT	TC	TT	TC	TC	CC	TC	CC	TC	TT	TC	CC	CC	TT	TC	TC	CC	CC	TT	CC	TT	TC	TC	CC	TC	TT	TC	TC	CC	TC	CC	CC	CC	TC	CC	TC	TC	TT	TT	TC	CC	TT	CC	TC	CC	TT	TT
contig48103_159	G	A	GG	AG	GG	AG	AG	AG	AG	AA	AG	GG	AG	AA	AA	GG	AG	AG	AA	AA	GG	AA	GG	AG	AG	AA	AG	GG	AG	AG	AA	AG	AA	AA	AA	AG	AA	AG	AG	GG	GG	AG	AA	GG	GG	GG	AA	GG	GG
contig48103_74	G	A	GG	GG	GG	AG	GG	AG	GG	AG	AG	GG	GG	AG	AG	GG	AG	GG	AG	AG	GG	AG	GG	GG	AG	AG	GG	GG	AG	GG	AG	GG	AG	AG	AG	GG	AG	AG	AG	GG	GG	GG	AG	GG	GG	GG	AG	GG	GG
contig48103_93	G	A	GG	AG	GG	AG	AG	AG	AG	AA	AG	GG	AG	AA	AA	GG	AG	AG	AA	AA	GG	AA	GG	AG	AG	AA	AG	GG	AG	AG	AA	AG	AA	AA	AA	AG	AA	AG	AG	GG	GG	AG	AA	GG	AG	AG	AA	GG	GG
contig10010_9	T	C	TT	TT	TT	CT	TT	CT	TT	CT	CT	TT	TT	CT	CT	TT	CT	TT	CT	CT	TT	CT	TT	TT	CT	CT	TT	TT	CT	TT	CT	TT	CT	CT	CT	TT	CT	CT	CT	TT	TT	TT	CT	TT	TT	TT	CT	TT	TT
contig20880_166	A	G	AA	AA	AA	GA	AA	GA	AA	GA	GA	AA	AA	GA	GA	AA	GA	AA	GA	GA	AA	GA	AA	AA	GA	GA	AA	AA	GA	AA	GA	AA	GA	GA	GA	AA	GA	GA	GA	AA	AA	AA	GA	AA	AA	AA	GA	AA	AA
contig49968_155	C	T	CC	TC	CC	CC	TC	CC	TC	TC	CC	CC	TC	TC	TC	CC	CC	TC	TC	TC	CC	TC	CC	TC	CC	TC	TC	CC	CC	TC	TC	TC	TC	TC	TC	TC	TC	CC	CC	CC	CC	TC	TC	CC	TC	CC	TC	CC	CC
contig53940_228	G	A	AA	GG	AA	AG	AG	AG	AG	GG	AG	AA	AG	GG	GG	AA	AG	AG	GG	GG	AA	GG	AA	AG	AG	GG	AA	AA	AG	AG	GG	AG	GG	GG	GG	AG	GG	AG	AG	AA	AA	AG	GG	AA	AG	AG	AG	AA	AA
contig46796_203	A	C	CC	AA	CC	CA	CA	CA	CA	AA	CA	CC	CA	AA	AA	CC	CA	CA	AA	AA	CC	AA	CC	CA	CA	AA	CA	CC	CA	CA	AA	CA	AA	AA	AA	CA	AA	CA	CA	CC	CC	CA	AA	CC	CA	CC	CA	CC	CC
contig717829_41	C	T	CC	TC	CC	CC	TC	CC	TC	TC	CC	CC	TC	TC	TC	CC	CC	TC	TC	TC	CC	TC	CC	TC	CC	TC	TC	CC	CC	TC	TC	TC	TC	TC	TC	TC	TC	CC	CC	CC	CC	TC	TC	CC	TC	CC	TC	CC	CC
contig36515_191	A	G	AA	GA	AA	AA	GA	AA	GA	GA	AA	AA	GA	GA	GA	AA	AA	GA	GA	GA	AA	GA	AA	GA	AA	GA	GA	AA	AA	GA	GA	GA	GA	GA	GA	GA	GA	AA	AA	AA	AA	GA	GA	AA	GA	AA	GA	AA	AA
contig25879_249	C	T	CC	TC	CC	CC	TC	CC	TC	TC	CC	CC	TC	TC	TC	CC	CC	TC	TC	TC	CC	TC	CC	TC	CC	TC	TC	CC	CC	TC	TC	TC	TC	TC	TC	TC	TC	CC	CC	CC	CC	TC	TC	CC	TC	CC	TC	CC	CC
contig46796_167	A	G	AA	GA	AA	AA	GA	AA	GA	GA	AA	AA	GA	GA	GA	AA	AA	GA	GA	GA	AA	GA	AA	GA	AA	GA	GA	AA	AA	GA	GA	GA	GA	GA	GA	GA	GA	AA	AA	AA	AA	GA	GA	AA	GA	AA	GA	AA	AA
contig46796_68	C	T	CC	TC	CC	TC	CC	TC	CC	TC	TC	CC	CC	TC	TC	CC	CC	CC	TC	TC	CC	TC	CC	CC	TC	TC	CC	CC	TC	CC	TC	CC	TC	TC	TC	CC	TC	TC	TC	CC	CC	CC	TC	CC	TC	TC	TC	CC	CC
contig597406_67	C	T	CC	TC	CC	TC	CC	TC	CC	TC	TC	CC	CC	TC	TC	CC	CC	CC	TC	TC	CC	TC	CC	CC	TC	TC	CC	CC	TC	CC	TC	CC	TC	TC	TC	CC	TC	TC	TC	CC	CC	CC	TC	CC	TC	TC	TC	CC	CC
contig88390_231	G	A	GG	AG	GG	GG	AG	GG	AG	AG	GG	GG	AG	AG	AG	GG	GG	AG	AG	AG	GG	AG	GG	AG	GG	AG	AG	GG	GG	AG	AG	AG	AG	AG	AG	AG	AG	GG	GG	GG	GG	AG	AG	GG	AG	GG	AG	GG	GG
contig25879_54	G	A	AA	GG	AA	AG	AG	AG	AG	GG	AG	AA	AG	GG	GG	AA	AA	AG	GG	GG	AA	GG	AA	AG	AG	GG	AG	AA	AG	AG	GG	AG	GG	GG	GG	AG	GG	AG	AG	AA	AA	AG	GG	AA	GG	GG	GG	AA	AA
contig25879_105	G	A	GG	AG	GG	AG	GG	AG	GG	AG	AG	GG	GG	AG	AG	GG	GG	GG	AG	AG	GG	AG	GG	GG	AG	AG	GG	GG	AG	GG	AG	GG	AG	AG	AG	GG	AG	AG	AG	GG	GG	GG	AG	GG	AG	AG	AG	GG	GG
contig46796_70	T	C	TT	CT	TT	CT	TT	CT	TT	CT	CT	TT	TT	CT	CT	TT	CT	TT	TT	CT	TT	CT	TT	TT	CT	CT	TT	TT	CT	TT	CT	TT	CT	CT	CT	TT	CT	CT	CT	TT	TT	TT	CT	TT	CT	CT	CT	TT	TT
contig46796_262	C	T	TT	CC	TT	TC	TT	TC	TC	CC	TC	TT	TC	CC	CC	TT	CC	TC	CC	CC	TT	CC	TT	TT	TC	CC	TC	TT	CC	TC	CC	TC	CC	CC	CC	TC	CC	TC	TC	TT	TT	TC	CC	TT	CC	CC	CC	TT	TT
contig46796_5	T	G	GG	TT	GG	GT	GG	GT	GT	TT	GT	GG	GT	TT	TT	GG	GT	GT	TT	TT	GG	TT	GG	GT	GT	TT	GT	GG	GT	GT	TT	GT	TT	TT	TT	GT	TT	GT	GT	GG	GG	GT	TT	GG	TT	TT	TT	GG	GG
contig25879_46	T	C	TT	CT	TT	CT	TT	CT	TT	CT	CT	TT	TT	CT	CT	TT	CT	TT	CT	CT	TT	CT	TT	TT	CT	CT	TT	TT	CT	TT	CT	TT	CT	CT	CT	TT	CT	CT	CT	TT	TT	TT	CT	TT	CT	CT	CT	TT	TT
contig46796_208	T	C	TT	CT	TT	CT	TT	CT	TT	CT	CT	TT	TT	CT	CT	TT	CT	TT	TT	CT	TT	CT	TT	TT	CT	CT	TT	TT	CT	TT	CT	TT	CT	CT	CT	TT	CT	CT	CT	TT	TT	TT	CT	TT	CT	CT	CT	TT	TT
contig36014_63	C	G	CC	GC	CC	GC	CC	GC	CC	GC	GC	CC	CC	GC	GC	CC	GC	CC	GC	GC	CC	GC	CC	CC	GC	GC	CC	CC	GC	CC	GC	CC	GC	GC	GC	CC	GC	GC	GC	CC	CC	CC	GC	CC	GC	GC	GC	CC	CC
contig36515_231	G	T	GG	TG	GG	TG	GG	TG	GG	TG	TG	GG	GG	TG	TG	GG	TG	GG	TG	TG	GG	TG	GG	GG	TG	TG	GG	GG	TG	GG	TG	GG	TG	TG	TG	GG	TG	TG	TG	GG	GG	GG	TG	GG	TG	TG	TG	GG	GG
contig36515_184	A	G	GG	AA	GG	GA	GA	GA	GA	AA	GA	GG	GA	AA	AA	GG	GA	GA	AA	AA	GG	AA	GG	GA	GA	AA	GA	GG	GA	GA	AA	GA	AA	AA	AA	GA	AA	GA	GA	GG	GG	GA	AA	GG	GA	GA	GA	GG	GG
contig717829_191	A	G	AA	GA	AA	GA	AA	GA	AA	GA	GA	AA	AA	GA	GA	AA	GA	AA	GA	GA	AA	GA	AA	AA	GA	GA	AA	AA	GA	AA	GA	AA	GA	GA	GG	AA	GA	GA	GA	AA	AA	AA	GA	AA	GA	GA	GA	AA	AA
contig36515_114	C	T	CC	TC	CC	TC	CC	TC	CC	TC	TC	CC	CC	TC	TC	CC	TC	CC	TC	TC	CC	TC	CC	CC	TC	TC	CC	CC	TC	CC	TC	CC	TC	TC	TC	CC	TC	TC	TC	CC	CC	CC	TC	CC	TC	TC	TC	CC	CC
contig888487_44	T	G	GG	TT	GG	GT	GT	GT	GT	TT	GT	GG	GT	TT	TT	GG	GT	GT	TT	TT	GG	TT	GG	GT	GT	TT	GT	GG	GT	GT	TT	GT	TT	TT	TT	TT	TT	GT	GT	GG	GG	GT	TT	GG	GT	GT	GT	GG	GG
contig49968_214	C	T	CC	TC	CC	TC	CC	TC	CC	TC	TC	CC	CC	TC	TC	CC	TC	CC	TC	TC	CC	TC	CC	CC	TC	TC	CC	CC	TC	CC	TC	CC	TC	TC	TC	CC	TC	TC	TC	CC	CC	CC	TC	CC	CC	TC	CC	CC	CC
contig29543_25	C	G	CC	GC	CC	CC	GC	CC	GC	GC	CC	CC	GC	GC	GC	CC	CC	GC	GC	GC	CC	GC	CC	GC	CC	GC	GC	CC	CC	GC	GC	GC	GC	GC	GC	GC	GC	CC	CC	CC	CC	GC	GC	CC	GC	GC	GC	CC	CC
contig717829_174	T	C	TT	CT	TT	CT	TT	CT	TT	CT	CT	TT	TT	CT	CT	TT	CT	TT	CT	CT	TT	CT	TT	TT	CT	CT	TT	TT	CT	TT	CT	TT	CT	CT	CC	TT	CT	CT	CT	TT	TT	TT	CT	TT	CT	CT	TT	TT	TT
contig36515_236	G	A	GG	AG	GG	AG	GG	AG	GG	AG	AG	GG	GG	AG	AG	GG	AG	GG	AG	AG	GG	AG	GG	GG	AG	AG	GG	GG	AG	GG	AG	GG	AG	AG	AG	GG	AG	AG	AG	GG	GG	GG	AG	GG	AG	AG	GG	GG	GG
contig88390_73	G	A	GG	AG	GG	AG	GG	AG	GG	AG	AG	GG	GG	AG	AG	GG	AG	GG	AG	AG	GG	AG	GG	GG	AG	GG	GG	GG	AG	GG	AG	GG	AG	AG	AG	GG	AG	AG	AG	GG	GG	GG	AG	GG	AG	AG	GG	GG	GG
contig29543_186	A	C	AA	CA	AA	CA	AA	CA	AA	CA	CA	AA	AA	CA	CA	AA	CA	AA	CA	CA	AA	CA	AA	AA	CA	AA	AA	AA	CA	AA	CA	AA	CA	CA	CA	AA	CA	CA	CA	AA	AA	AA	CA	AA	CA	CA	AA	AA	AA
contig29543_232	G	A	GG	AG	GG	GG	AG	GG	AG	AG	GG	GG	AG	AG	AG	GG	GG	AG	AG	AG	GG	AG	GG	AG	GG	AG	AG	GG	GG	AG	AG	AG	AG	AG	AG	AG	AG	GG	GG	GG	GG	AG	AG	GG	AG	AG	AG	GG	GG
contig434634_128	A	C	CC	AA	CC	CA	CA	AA	CA	AA	CA	CC	CA	AA	AA	CC	AA	CA	AA	AA	CC	AA	CC	AA	CA	CA	CA	CC	CA	CA	AA	CA	AA	AA	AA	CA	AA	CA	CA	CC	CC	CA	AA	CC	AA	CA	CA	CC	CC
contig29543_103	T	C	TT	CT	TT	TT	CT	TT	CT	CT	TT	TT	CT	CT	CT	TT	TT	CT	CT	CT	TT	CT	TT	CT	TT	CT	CT	TT	TT	CT	CT	CT	CT	CT	CT	CT	CT	TT	TT	TT	TT	CT	CT	TT	CT	CT	CT	TT	TT
contig67576_47	A	G	GG	AA	GG	GA	GA	AA	GA	AA	GA	GG	GA	AA	AA	GG	AA	GA	AA	AA	GG	AA	GG	GA	AA	GA	GA	GG	AA	GA	AA	GA	AA	AA	AA	GA	AA	AA	AA	GG	GG	GA	AA	GG	AA	AA	GA	GG	GG
contig88390_152	C	T	CC	TC	CC	TC	CC	TC	CC	TC	TC	CC	CC	TC	TC	CC	TC	CC	TC	TC	CC	TC	CC	CC	TC	CC	CC	CC	TC	CC	TC	CC	TC	TC	TC	CC	TC	TC	TC	CC	CC	CC	TC	CC	TC	TC	TC	CC	CC
contig21849_29	C	A	CC	AC	CC	AC	CC	AC	CC	AC	AC	CC	CC	AC	AC	CC	AC	CC	AC	AC	CC	AC	CC	CC	AC	CC	CC	CC	AC	CC	AC	CC	AC	AC	AC	CC	AC	AC	AC	CC	CC	CC	AC	CC	AC	AC	AC	CC	CC
contig722414_32	A	G	AA	GA	AA	GA	AA	GA	AA	GA	GA	AA	AA	GG	AA	AA	GA	AA	GA	GA	AA	GA	AA	AA	GA	AA	AA	AA	GA	AA	GA	AA	GA	GA	GA	AA	GA	GA	GA	AA	AA	AA	GA	AA	GA	GA	GA	AA	AA
contig658368_107	T	C	TT	CT	TT	CT	TT	CT	TT	CT	CT	TT	TT	CT	TT	TT	CT	TT	CT	CT	TT	CT	TT	TT	CT	TT	TT	TT	CT	TT	CT	TT	CT	CT	CT	TT	CT	CT	CT	TT	TT	TT	CT	TT	CC	TT	CT	TT	TT
contig12107_32	C	A	CC	AC	CC	AC	CC	AC	CC	AC	AC	CC	CC	AC	CC	CC	AC	CC	AC	AC	CC	AC	CC	CC	AC	CC	CC	CC	AC	CC	AC	CC	AC	AC	AC	CC	AC	AC	AC	CC	CC	CC	AC	CC	AC	AC	AC	CC	CC
contig722414_180	T	C	TT	CT	TT	CT	TT	CT	TT	CT	CT	TT	TT	CC	TT	TT	CT	TT	CT	CT	TT	CT	TT	TT	CT	TT	TT	TT	CT	TT	CT	TT	CT	CT	CT	TT	CT	CT	CT	TT	TT	TT	CT	TT	CT	CT	CT	TT	TT
contig722414_61	A	G	AA	GA	AA	GA	AA	GA	AA	GA	GA	AA	AA	GG	AA	AA	GA	AA	GA	GA	AA	GA	AA	AA	GA	AA	AA	AA	GA	AA	GA	AA	GA	GA	GA	AA	GA	GA	GA	AA	AA	AA	GA	AA	GA	GA	GA	AA	AA
contig658368_100	A	G	GG	AA	GG	GA	GA	GA	GA	AA	AA	GG	GA	AA	GA	GG	GA	GA	AA	AA	GG	AA	GG	GA	AA	GA	GA	GG	GA	GA	AA	GA	AA	AA	AA	GA	AA	GA	GA	GG	GG	GA	AA	GG	AA	AA	AA	GG	GG
contig658368_75	C	T	CC	TC	CC	TC	CC	TC	CC	TC	TC	CC	CC	TC	CC	CC	TC	CC	TC	TC	CC	TC	CC	CC	TC	CC	CC	CC	TC	CC	TC	CC	TC	TC	TC	CC	TC	TC	TC	CC	CC	CC	TC	CC	TC	TC	TC	CC	CC
contig12107_105	G	A	GG	AA	GG	GG	AG	GG	AG	AA	GG	GG	AG	AG	AG	GG	GG	AG	AG	AG	GG	AG	GG	AG	GG	AG	AG	GG	GG	AG	AG	AG	AG	AG	AG	AG	AG	GG	GG	GG	GG	AG	AG	GG	AA	AA	AA	GG	GG
contig34408_115	C	T	TT	CC	TT	TC	TC	TC	TC	CC	TC	TT	TC	CC	TC	TT	TC	TC	CC	CC	TT	CC	TT	TC	TC	TC	TC	TT	TC	TC	CC	TC	CC	CC	CC	TC	CC	TC	TC	TT	TT	TC	CC	TT	TC	TC	TC	TT	TT
contig12107_100	C	T	CC	TC	CC	TC	CC	TC	CC	TC	TC	CC	CC	TC	CC	CC	TC	CC	TC	TC	CC	TC	CC	CC	TC	CC	CC	CC	TC	CC	TC	CC	TC	TC	TC	CC	TC	TC	TC	CC	CC	CC	TC	CC	TC	TC	TC	CC	CC
contig12107_58	C	T	CC	TC	CC	TC	CC	TC	CC	TC	TC	CC	CC	TC	CC	CC	TC	CC	TC	TC	CC	TC	CC	CC	TC	CC	CC	CC	TC	CC	TC	CC	TC	TC	TC	CC	TC	TC	TC	CC	CC	CC	TC	CC	CC	CC	CC	CC	CC
contig50322_73	C	T	CC	TC	CC	CC	TC	CC	TC	TC	CC	CC	TC	TC	TC	CC	CC	TC	TC	TC	CC	TC	CC	TC	CC	TC	TC	CC	CC	TC	TC	TC	TC	TC	TC	TC	TC	CC	CC	CC	CC	TC	TC	CC	TC	TC	TC	CC	CC
contig12107_118	G	A	GG	AG	GG	GG	AG	GG	AG	AG	GG	GG	AG	AG	AG	GG	GG	AG	AG	AG	GG	AG	GG	AG	GG	AG	AG	GG	GG	AG	AG	AG	AG	AG	AG	AG	AG	GG	GG	GG	GG	AG	AG	GG	AG	AG	AG	GG	GG
contig53510_89	A	C	CC	AA	CC	CA	CA	CA	CA	AA	CA	CC	CA	AA	CA	CC	CA	CA	AA	AA	CC	CA	CC	CA	CA	CA	CA	CC	CA	CA	AA	CA	AA	AA	AA	CA	AA	CA	CA	CC	CC	CA	AA	CC	CA	CA	CA	CC	CC
contig50322_92	C	T	CC	TC	CC	CC	TC	CC	TC	TC	CC	CC	TC	TC	TC	CC	CC	TC	TC	TC	CC	TC	CC	TC	CC	TC	TC	CC	CC	TC	TC	TC	TC	TC	TC	TC	TC	CC	CC	CC	CC	TC	TC	CC	CC	CC	CC	CC	CC
contig50322_184	G	A	GG	AG	GG	AG	GG	AG	GG	AG	AG	GG	GG	AG	GG	GG	AG	GG	AG	AG	GG	GG	GG	GG	AG	GG	GG	GG	AG	GG	AG	GG	AG	AG	AG	GG	AG	AG	AG	GG	GG	GG	AG	GG	GG	GG	GG	GG	GG
contig36932_271	A	G	AA	GA	AA	AA	GA	AA	GA	GA	AA	AA	GA	GA	GA	AA	AA	GA	GA	GA	AA	GA	AA	GA	AA	GA	GA	AA	AA	GA	GA	GA	GA	GA	GA	GA	GA	AA	AA	AA	AA	GA	GA	AA	AA	AA	AA	AA	AA
contig50322_114	A	C	AA	CA	AA	AA	CA	AA	CA	CA	AA	AA	CA	CA	CA	AA	AA	CA	CA	CA	AA	CA	AA	CA	AA	CA	CA	AA	AA	CA	CA	CA	CA	CA	CA	CA	CA	AA	AA	AA	AA	CA	CA	AA	AA	AA	AA	AA	AA
contig50322_209	C	T	TT	CC	TT	TC	TC	TC	TC	CC	TC	TT	TC	CC	TC	TT	TC	TC	CC	CC	TT	TC	TT	TC	TC	TC	TC	TT	TC	TC	CC	TC	CC	CC	CC	TC	CC	TC	TC	TT	TT	TC	CC	TT	CC	CC	CC	TT	TT
contig50322_17	T	A	TT	AT	TT	AT	TT	AT	TT	AT	AT	TT	TT	AT	TT	TT	AT	TT	AT	AT	TT	TT	TT	TT	AT	TT	TT	TT	AT	TT	AT	TT	AT	AT	AT	TT	AT	AT	AT	TT	TT	TT	AT	TT	TT	TT	TT	TT	TT
contig53510_155	G	A	GG	AG	GG	GG	AG	GG	AG	AG	GG	GG	AG	AG	AG	GG	GG	AG	AG	AG	GG	AG	GG	AG	GG	AG	AG	GG	GG	AG	AG	AG	AG	AG	AG	AG	AG	GG	GG	GG	GG	AG	AG	GG	GG	GG	GG	GG	GG
contig50322_166	A	C	CC	AA	CC	CA	CA	CA	CA	AA	CA	CC	CC	AA	CA	CC	CA	CA	AA	AA	CC	CA	CC	CA	CA	CA	CA	CC	CA	CC	AA	CA	AA	AA	AA	CA	AA	CA	CA	CC	CC	CA	AA	CC	AA	AA	AA	CC	CC
contig50322_190	C	T	TT	CC	TT	TC	TC	TC	TC	CC	TC	TT	TT	CC	TC	TT	TC	TC	CC	CC	TT	TC	TT	TC	TC	TC	TC	TT	TC	TT	CC	TC	CC	CC	CC	TC	CC	TC	TC	TT	TT	TC	CC	TT	CC	CC	CC	TT	TT
contig50322_149	C	T	CC	TC	CC	TC	CC	TC	CC	TC	TC	CC	CC	TC	CC	CC	TC	CC	TC	TC	CC	CC	CC	CC	TC	CC	CC	CC	TC	CC	TC	CC	TC	TC	TC	CC	TC	TC	TC	CC	CC	CC	TC	CC	CC	CC	CC	CC	CC
contig50322_206	C	A	CC	AC	CC	AC	CC	AC	CC	AC	AC	CC	CC	AC	CC	CC	AC	CC	AC	AC	CC	CC	CC	CC	AC	CC	CC	CC	AC	CC	AC	CC	AC	AC	AC	CC	AC	AC	AC	CC	CC	CC	AC	CC	CC	CC	CC	CC	CC
contig50322_224	C	T	TT	CC	TT	TC	TC	TC	TC	CC	TC	TT	TT	CC	TC	TT	TC	TC	CC	CC	TT	TC	TT	TC	TC	TC	TC	TT	TC	TT	CC	TC	CC	CC	CC	TC	CC	TC	TC	TT	TT	TC	CC	TT	CC	CC	CC	TT	TT
contig50322_157	C	T	TT	CC	TT	TC	TC	TC	TC	CC	TC	TT	TT	CC	TC	TT	TC	TC	CC	CC	TT	TC	TT	TC	TC	TC	TC	TT	TC	TT	CC	TC	CC	CC	CC	TC	CC	TC	TC	TT	TT	TC	CC	TT	CC	CC	CC	TT	TT
contig50322_219	T	G	TT	GT	TT	GT	TT	GT	TT	GT	GT	TT	TT	GT	TT	TT	GT	TT	GT	GT	TT	TT	TT	TT	GT	TT	TT	TT	GT	TT	GT	TT	GT	GT	GT	TT	GT	GT	GT	TT	TT	TT	GT	TT	GT	TT	TT	TT	TT
contig50322_232	C	A	AA	CC	AA	AC	AC	AC	AC	CC	AC	AA	AA	CC	AC	AA	AC	AC	CC	CC	AA	AC	AA	AC	AC	AC	AC	AA	AC	AA	CC	AC	CC	CC	CC	AC	CC	AC	AC	AA	AA	AC	CC	AA	AC	CC	CC	AA	AA
contig50322_65	C	T	CC	TT	CC	TC	TC	TC	TC	TT	TC	CC	CC	TT	TC	CC	TC	TC	TT	TT	CC	TC	CC	TC	TC	TC	TC	CC	TC	CC	TT	TC	TT	TT	TT	TC	TT	TC	TC	CC	CC	TC	TT	CC	TC	CC	CC	CC	CC
contig50322_233	T	C	CC	TT	CC	CT	CT	CT	CT	TT	CT	CC	CC	TT	CT	CC	CT	CT	TT	TT	CC	CT	CC	CT	CT	CT	CT	CC	CT	CC	TT	CT	TT	TT	TT	CT	TT	CT	CT	CC	CC	CT	TT	CC	CT	TT	TT	CC	CC
contig50322_30	G	A	AA	GG	AA	AG	AG	AG	AG	GG	AG	AA	AA	GG	AG	AA	AG	AG	GG	GG	AA	AG	AA	AG	AG	AG	AG	AA	AG	AA	GG	AG	GG	GG	GG	AG	GG	AG	AG	AA	AA	AG	GG	AA	AG	GG	GG	AA	AA
contig765672_180	G	A	GG	AA	GG	AG	AG	AG	AG	AA	AG	GG	AG	AG	GG	GG	AG	AG	AA	AA	GG	AG	GG	AG	AG	AG	AG	GG	AG	AA	AA	AG	AA	AA	AA	AG	AA	AG	AG	GG	GG	AG	AA	GG	AG	GG	GG	GG	GG
contig36932_281	G	A	GG	AG	GG	AG	GG	AG	GG	AG	AG	GG	GG	AG	GG	GG	AG	GG	AG	AG	GG	GG	GG	GG	AG	GG	GG	GG	AG	GG	AG	GG	AG	AG	AG	GG	AG	AG	AG	GG	GG	GG	AG	GG	GG	GG	GG	GG	GG
contig765672_127	C	T	CC	TC	CC	TC	CC	TC	CC	TC	TC	CC	CC	CC	CC	CC	TC	CC	TC	TC	CC	CC	CC	CC	TC	CC	CC	CC	TC	CC	TC	CC	TC	TC	TC	CC	TC	TC	TC	CC	CC	CC	TC	CC	CC	CC	CC	CC	CC
contig36932_203	G	C	GG	CG	GG	CG	GG	CG	GG	CG	CG	GG	GG	CG	GG	GG	CG	GG	CG	CG	GG	GG	GG	GG	CG	GG	GG	GG	CG	GG	CG	GG	CG	CG	CG	GG	CG	CG	CG	GG	GG	GG	CG	GG	GG	GG	GG	GG	GG
contig36932_125	C	G	CC	GC	CC	GC	CC	GC	CC	GC	GC	CC	CC	GC	CC	CC	GC	CC	GC	GC	CC	CC	CC	CC	GC	CC	CC	CC	GC	CC	GC	CC	GC	GC	GC	CC	GC	GC	GC	CC	CC	CC	GC	CC	CC	CC	CC	CC	CC
contig36932_197	A	G	AA	GA	AA	GA	AA	GA	AA	GA	GA	AA	AA	GA	AA	AA	GA	AA	GA	GA	AA	AA	AA	AA	GA	AA	AA	AA	GA	AA	GA	AA	GA	GA	GA	AA	GA	GA	GA	AA	AA	AA	GA	AA	AA	AA	AA	AA	AA
contig36932_119	C	T	TT	CC	TT	TC	TC	TC	TC	CC	TC	TT	TC	CC	TC	TT	TC	TC	CC	CC	TT	TC	TT	TC	TC	TC	TC	TT	TC	TC	CC	TC	CC	CC	CC	TC	CC	TC	TC	TT	TT	TC	CC	TT	TC	CC	CC	TT	TT
contig36932_69	A	G	GG	AA	GG	GA	GA	GA	GA	AA	GA	GG	GA	AA	GA	GG	GA	GA	AA	AA	GG	GA	GG	GA	GA	GA	GA	GG	GA	GA	AA	GA	AA	AA	AA	GA	AA	GA	GA	GG	GG	GA	AA	GG	GA	AA	AA	GG	GG
contig765672_23	G	A	GG	AA	GG	AG	AG	AG	AG	AA	AA	GG	AG	AG	GG	GG	AG	AG	AA	AA	GG	AG	GG	GG	AG	AG	AG	GG	AA	AG	AA	AG	AA	AA	AA	AG	AA	AG	AG	GG	GG	AG	AA	GG	AG	AA	AA	GG	GG
contig36932_98	C	T	CC	TC	CC	TC	CC	TC	CC	TC	TC	CC	CC	TC	CC	CC	TC	CC	TC	TC	CC	CC	CC	CC	TC	CC	CC	CC	TC	CC	TC	CC	TC	TC	TC	CC	TC	TC	TC	CC	CC	CC	TC	CC	CC	TC	TC	CC	CC
contig765672_185	C	T	CC	TT	CC	TC	TC	TC	TC	TT	TT	CC	TC	TC	CC	CC	TC	TC	TT	TT	CC	TC	CC	CC	TC	TC	TC	CC	TT	TT	TT	TC	TT	TT	TT	TC	TT	TC	TC	CC	CC	TC	TT	CC	TC	TT	TT	CC	CC
[truncated: 27,759 more rows]
[truncated: 155 more columns]
