# Supplementary material for: Construction of a high-density linkage map and detection of sex-specific markers in Penaeus japonicus
Source: PeerJ. 2021 Oct 29;9:e12390. doi: 10.7717/peerj.12390 (PMC8559604; doi:10.7717/peerj.12390)
Supplement: Supplemental Information 2 [file peerj-09-12390-s002.xlsx]

## Sheet: TableS1
Table S2. Sequencing data of GBS for each individual. "X*" indicates the individual is a male offspring, "C*" indicates the individual is female spring, and "P*" indicates the individual is one parent.
SampleID	Raw_Reads	Raw_Base(GB)	Clean_Reads	Clean_Base(GB)	Q20	GCcontent(%)
X37	10753554	1.58	10753554	1.46	96.75	50.76
X38	10830402	1.59	10830402	1.47	96.92	50.02
X39	11354158	1.66	11354158	1.54	97.01	49.38
X40	10846262	1.59	10846262	1.48	96.87	50.14
X41	10996672	1.61	10996672	1.5	96.89	50.14
X43	10431176	1.53	10431176	1.42	97.25	47.78
X45	10675710	1.57	10675710	1.45	96.43	49.91
X46	10802692	1.59	10802692	1.47	97.3	47.78
X47	10861020	1.6	10861020	1.48	96.71	49.2
X48	10688912	1.58	10688912	1.45	96.96	49.55
X49	10710754	1.58	10710754	1.46	96.84	49.22
X50	10558858	1.56	10558858	1.44	96.94	49.39
X52	11464384	1.69	11464384	1.56	96.82	49.7
X53	10816548	1.59	10816548	1.47	96.79	49.57
X54	11401230	1.68	11401230	1.55	96.95	49.04
X55	10923764	1.61	10923764	1.49	96.93	49.31
X57	11236240	1.65	11236240	1.53	97.02	49.04
X58	10900346	1.6	10900346	1.48	96.94	49.26
X59	11219040	1.65	11219040	1.53	96.95	49.24
X61	10859298	1.6	10859298	1.48	96.81	50.16
X62	10730176	1.58	10730176	1.46	96.98	49.41
X63	11316662	1.66	11316662	1.54	96.95	49.03
X64	11002204	1.62	11002204	1.5	96.71	50.52
X65	10585702	1.56	10585702	1.44	97.03	49.24
X66	10789090	1.59	10789090	1.47	96.86	49.13
X67	11323578	1.66	11323578	1.54	96.91	48.7
X68	10636112	1.56	10636112	1.45	96.88	49.17
X69	11361400	1.67	11361400	1.55	97.02	50.01
X71	11232976	1.65	11232976	1.53	97.08	49.34
X72	11320174	1.66	11320174	1.54	97.16	49.78
X73	10890492	1.6	10890492	1.48	97.11	49.64
X74	10607312	1.56	10607312	1.44	97.21	49.14
X75	10994094	1.62	10994094	1.5	97.17	49.51
X76	10675164	1.57	10675164	1.45	97.18	49.62
X77	11069484	1.63	11069484	1.51	96.91	49.45
X78	11340454	1.67	11340454	1.54	97.09	48.46
X79	10895864	1.6	10895864	1.48	97.36	47.57
X80	10754638	1.58	10754638	1.46	97.3	48.37
X86	10975720	1.61	10975720	1.49	96.96	49.97
X87	10661442	1.57	10661442	1.45	97.1	48.87
X88	10950522	1.61	10950522	1.49	97.06	49.04
X89	11090484	1.63	11090484	1.51	97.14	48.64
X90	10832798	1.59	10832798	1.47	97.27	48.55
X94	10717478	1.58	10717478	1.46	97.26	48.22
X95	10893864	1.6	10893864	1.48	97.33	46.37
P6	11079112	1.62	11079112	1.51	96.51	49.27
P9	10880462	1.59	10880462	1.48	96.41	50.23
P12	10933776	1.6	10933776	1.49	97.38	47.49
P19	10592650	1.55	10592650	1.44	96.73	47.73
P20	10774542	1.58	10774542	1.47	95.98	50.76
P29	11283892	1.65	11283892	1.53	97.15	47.05
X27	10938446	1.6	10938446	1.49	96.5	47.67
C25	10694598	1.58	10694598	1.45	96.31	50.34
C26	11598984	1.71	11598984	1.58	96.32	49.58
C32	11590642	1.71	11590642	1.58	96.86	49.01
C34	10541996	1.55	10541996	1.43	96.67	47.88
C42	10855910	1.6	10855910	1.48	96.22	49.22
C47	10945986	1.61	10945986	1.49	96.32	48.95
C48	11568816	1.7	11568816	1.57	96.17	49.45
C59	10657098	1.57	10657098	1.45	96.04	49.07
C60	10494854	1.54	10494854	1.43	96.28	48.9
C61	10419774	1.53	10419774	1.42	96.14	49.42
C67	11283676	1.66	11283676	1.53	96.63	47.66
C68	10769878	1.58	10769878	1.46	96.51	48.31
C73	10585682	1.56	10585682	1.44	96.44	49.58
C76	11154916	1.64	11154916	1.52	96.3	49.99
C77	10526808	1.55	10526808	1.43	96.31	49.14
C78	11317412	1.66	11317412	1.54	96.65	49.33
C83	11388966	1.67	11388966	1.55	96.63	47.64
C88	10853288	1.58	10853288	1.48	96.09	49.69
C89	10694534	1.57	10694534	1.45	96.76	49.53
C91	11369544	1.67	11369544	1.55	96.63	49.33
C94	11670046	1.72	11670046	1.59	96.61	49.21
C95	10833890	1.59	10833890	1.47	96.6	49.89
C97	11011258	1.61	11011258	1.5	96.73	49.71
C100	11267252	1.65	11267252	1.53	96.79	50.09
X1	11117230	1.63	11117230	1.51	96.62	49.35
X4	11292512	1.65	11292512	1.54	96.64	49.92
X6	11022698	1.61	11022698	1.5	96.65	49.73
X8	11035204	1.62	11035204	1.5	96.57	50
X11	11350682	1.66	11350682	1.54	96.6	49.09
X13	10953828	1.6	10953828	1.49	96.86	49.74
X14	11172348	1.64	11172348	1.52	96.73	49.76
X15	10831016	1.59	10831016	1.47	96.9	49.92
X16	11266622	1.65	11266622	1.53	96.72	49.28
X17	11010614	1.61	11010614	1.5	96.67	49.89
X18	11668404	1.71	11668404	1.59	96.84	49.34
X19	10722288	1.57	10722288	1.46	96.93	49.91
X20	10809894	1.58	10809894	1.47	96.63	50.55
X29	11459360	1.69	11459360	1.56	96.41	49.81
X30	11274570	1.66	11274570	1.53	96.77	49.23
X31	10968194	1.62	10968194	1.49	97.1	49.85
X32	11458078	1.69	11458078	1.56	96.77	49.89
X34	11339198	1.67	11339198	1.54	96.71	50.02
X35	11203718	1.65	11203718	1.52	96.92	49.8
X36	11259044	1.66	11259044	1.53	96.81	49.91
C17	12852784	1.9	12852784	1.75	96.03	48.66
C18	11296074	1.67	11296074	1.54	96.23	48.85
C19	11791734	1.74	11791734	1.6	96.66	49.43
C20	12649554	1.87	12649554	1.72	96.28	49.81
C21	13081622	1.93	13081622	1.78	96.26	49.36
C22	10770132	1.59	10770132	1.46	96.28	49.24
C23	10644150	1.57	10644150	1.45	96.49	49.02
C24	10891750	1.61	10891750	1.48	96.34	48.7
C27	10797646	1.59	10797646	1.47	96.3	49.69
C28	12402454	1.83	12402454	1.69	96.41	49.5
C29	10447370	1.54	10447370	1.42	96.42	49.7
C30	10953804	1.62	10953804	1.49	96.11	48.69
C31	12333140	1.82	12333140	1.68	96.44	49.74
C33	13197408	1.95	13197408	1.79	96.08	48.82
C35	12378264	1.83	12378264	1.68	96.31	48.72
C36	13059872	1.93	13059872	1.78	96.4	49.57
C37	12866754	1.9	12866754	1.75	96.25	49.45
C38	14230360	2.1	14230360	1.94	96.1	49.81
C39	12747360	1.87	12747360	1.73	96.33	49.7
C40	11312798	1.66	11312798	1.54	96.29	48.88
X70	11523000	1.69	11523000	1.57	96.93	50.15
X81	10637464	1.56	10637464	1.45	97.11	48.98
X82	12578910	1.85	12578910	1.71	97.05	49.1
X83	10178694	1.5	10178694	1.38	97.15	49
X84	10964086	1.61	10964086	1.49	97	49.87
X85	13297344	1.95	13297344	1.81	97.04	49.95
X91	10587318	1.56	10587318	1.44	97.04	49.51
X92	11463914	1.69	11463914	1.56	97.01	49.92
X93	21136022	3.11	21136022	2.87	96.91	49.49
X96	11382284	1.67	11382284	1.55	97.16	48.25
X97	10890230	1.6	10890230	1.48	97.3	48.57
X98	11017168	1.61	11017168	1.5	97.1	48.38
X99	10758884	1.58	10758884	1.46	97.11	48.81
X100	11169746	1.63	11169746	1.52	97.04	48.45
P3	12963866	1.9	12963866	1.76	97.05	49.61
P15	10704916	1.57	10704916	1.46	96.47	50.45
X33	13145458	1.94	13145458	1.79	96.56	49.47
X42	10796328	1.58	10796328	1.47	96.81	49.78
X44	11165510	1.64	11165510	1.52	96.39	49.93
C1	13506828	1.99	13506828	1.84	96.03	46.06
C2	12103146	1.79	12103146	1.65	96.19	47.17
C3	13261008	1.96	13261008	1.8	96.59	46.75
C4	11706442	1.73	11706442	1.59	96.21	46.5
C5	12817568	1.89	12817568	1.74	96.2	45.97
C6	11936522	1.76	11936522	1.62	96.18	45.3
C7	11849054	1.75	11849054	1.61	96.41	46.28
C8	10854194	1.6	10854194	1.48	96.41	44.07
C9	12478212	1.84	12478212	1.7	96.22	49.36
C10	11458584	1.69	11458584	1.56	96.12	48.22
C11	11340104	1.67	11340104	1.54	96.33	48.55
C12	12595476	1.86	12595476	1.71	96.17	49.97
C13	13172288	1.94	13172288	1.79	96.16	50.46
C14	11473586	1.69	11473586	1.56	96.04	48.22
C15	12687304	1.87	12687304	1.73	96.41	50.07
C16	12413656	1.83	12413656	1.69	96.35	49.71
X21	12901684	1.89	12901684	1.75	96.25	50.05
X22	12399682	1.82	12399682	1.69	96.22	49.3
X23	12401248	1.82	12401248	1.69	96.28	49.25
X24	13343220	1.95	13343220	1.81	96.2	50.36
X25	11589346	1.7	11589346	1.58	96.18	50.61
X26	12101672	1.77	12101672	1.65	96.19	49.26
X28	13361998	1.96	13361998	1.82	95.93	50.23
C41	12238816	1.8	12238816	1.66	96.17	49.45
C43	11888086	1.75	11888086	1.62	96.31	49.23
C44	12699974	1.87	12699974	1.73	96.26	49.89
C45	10773020	1.58	10773020	1.47	96.1	49.37
C46	12167602	1.79	12167602	1.65	96.33	49.22
C49	12571060	1.85	12571060	1.71	96.19	50.14
C50	11132322	1.64	11132322	1.51	96.37	50.09
C51	11306766	1.66	11306766	1.54	96.25	48.78
C52	10607734	1.56	10607734	1.44	95.99	50.96
C53	12623220	1.86	12623220	1.72	96.44	49.62
C54	12207482	1.79	12207482	1.66	96.18	49.96
C55	11358160	1.67	11358160	1.54	96.1	49.36
C56	12316614	1.81	12316614	1.68	96.17	49.28
C57	10220940	1.5	10220940	1.39	96.17	49.12
C58	12342394	1.81	12342394	1.68	96.18	49.79
C62	12817924	1.88	12817924	1.74	96.25	49.61
C63	11871170	1.75	11871170	1.61	96.18	49.41
C64	10310492	1.52	10310492	1.4	96.31	49
C65	10192532	1.5	10192532	1.39	96.31	48.63
C66	10642200	1.56	10642200	1.45	96.22	48.93
C69	10177332	1.5	10177332	1.38	96.44	49.65
C70	11117276	1.63	11117276	1.51	96.18	49.57
C71	10521900	1.55	10521900	1.43	96.34	49.46
C72	11776940	1.73	11776940	1.6	96.19	50.08
C74	13113118	1.93	13113118	1.78	96.34	49.42
C75	10658100	1.57	10658100	1.45	96.29	49.26
C79	11596398	1.7	11596398	1.58	96.36	49.31
C80	10925132	1.61	10925132	1.49	96.38	49.44
C81	10789108	1.59	10789108	1.47	96.15	50.11
C82	11031516	1.62	11031516	1.5	96.43	49.29
C84	11594486	1.7	11594486	1.58	96.3	50.09
C85	11367862	1.67	11367862	1.55	96.54	48.96
C86	11984382	1.75	11984382	1.63	96.28	49.45
C87	11044914	1.62	11044914	1.5	96.27	49.23
C90	11060528	1.63	11060528	1.5	96.83	49.92
C92	11019998	1.62	11019998	1.5	96.69	50.23
C93	11399034	1.68	11399034	1.55	96.87	49.82
C96	10756696	1.58	10756696	1.46	96.68	49.9
C98	10457130	1.53	10457130	1.42	96.68	50.28
C99	10243226	1.5	10243226	1.39	96.77	49.97
X2	10768516	1.58	10768516	1.46	96.68	50.31
X3	10240950	1.5	10240950	1.39	96.9	49.31
X5	10568898	1.55	10568898	1.44	96.59	50.21
X7	11173972	1.64	11173972	1.52	96.81	50.38
X9	10864644	1.59	10864644	1.48	96.68	49.52
X10	10622572	1.56	10622572	1.44	96.54	49.46
X12	7819872	1.15	7819872	1.06	96.57	49.84
X51	10728490	1.58	10728490	1.46	96.71	49.85
X56	10608472	1.56	10608472	1.44	96.86	49.7
X60	10253912	1.51	10253912	1.39	96.78	49.28
Total	2365165970	347.71	2365165970	321.69
