# Supplementary material for: Construction of a high-density linkage map and detection of sex-specific markers in Penaeus japonicus
Source: PeerJ. 2021 Oct 29;9:e12390. doi: 10.7717/peerj.12390 (PMC8559604; doi:10.7717/peerj.12390)
Supplement: Supplemental Information 3 [file peerj-09-12390-s003.xlsx]

## Sheet: Sheet1
Table S3. Sex averaged genetic linkage map of Penaeus japonicus.
CHROM	POS	Marker_ID
1	0	contig28319_82
1	0	contig28319_96
1	0	contig28319_83
1	0.756	contig12932_90
1	1.766	contig784270_26
1	1.766	contig21440_98
1	1.766	contig21440_52
1	1.766	contig21440_53
1	1.766	contig423427_7
1	1.766	contig784270_92
1	1.766	contig59559_57
1	1.766	contig14927_283
1	1.766	contig51826_174
1	1.766	contig784270_27
1	19.958	contig59559_44
1	19.958	contig38211_62
1	19.958	contig41284_168
1	19.958	contig33850_138
1	19.958	contig3286_267
1	19.958	contig33850_82
1	19.958	contig41284_176
1	19.958	contig33850_89
1	19.958	contig45545_180
1	19.958	contig38211_101
1	19.958	contig766776_138
1	19.958	contig45545_221
1	19.958	contig3286_122
1	19.958	contig11031_216
1	19.958	contig766776_134
1	19.958	contig766776_106
1	19.958	contig41284_143
1	19.958	contig45545_204
1	20.209	contig71349_103
1	20.209	contig41284_83
1	20.209	contig884999_56
1	20.209	contig658660_26
1	20.209	contig59559_58
1	20.209	contig68905_163
1	20.209	contig3286_141
1	20.209	contig3286_127
1	20.209	contig54884_124
1	20.209	contig59559_72
1	20.209	contig33850_71
1	20.209	contig51826_26
1	20.209	contig45545_210
1	20.209	contig68905_188
1	20.209	contig11031_236
1	20.209	contig68905_76
1	20.209	contig71349_127
1	20.209	contig3286_152
1	20.209	contig41830_91
1	20.209	contig11031_155
1	20.209	contig3286_202
1	20.209	contig884999_28
1	20.209	contig11031_218
1	20.964	contig22477_140
1	20.964	contig514019_126
1	20.964	contig22477_144
1	21.215	contig514019_30
1	21.215	contig41830_76
1	23.256	contig398333_57
1	23.256	contig55714_137
1	23.256	contig398333_142
1	23.256	contig25759_14
1	23.256	contig545223_22
1	23.256	contig55714_182
1	23.256	contig398333_111
1	23.256	contig533857_134
1	23.507	contig55714_51
1	27.948	contig724673_171
1	28.199	contig724673_147
1	28.199	contig724673_162
1	28.199	contig724673_172
1	28.199	contig724673_182
1	38.735	contig40481_10
1	44.003	contig1108_112
1	44.254	contig514019_111
1	45.264	contig17615_58
1	47.305	contig80284_96
1	47.555	contig26848_138
1	47.555	contig26848_167
1	47.555	contig80284_15
1	47.555	contig26848_96
1	47.555	contig26848_166
1	47.555	contig26848_149
1	47.555	contig450641_76
1	47.555	contig450641_110
1	48.311	contig25808_41
1	48.311	contig25808_37
1	48.311	contig46862_42
1	48.311	contig25808_187
1	48.311	contig46862_174
1	48.311	contig25808_265
1	48.311	contig561612_17
1	48.311	contig66249_54
1	48.311	contig40554_36
1	48.311	contig46862_151
1	48.311	contig29396_95
1	48.311	contig46862_39
1	48.311	contig66249_107
1	48.311	contig29396_75
1	48.311	contig356885_87
1	48.311	contig7906_148
1	48.311	contig46862_158
1	48.311	contig38463_104
1	48.311	contig29396_159
1	48.311	contig40554_147
1	48.311	contig66249_20
1	48.311	contig535543_70
1	48.311	contig40554_135
1	48.311	contig40554_140
1	48.311	contig356885_82
1	48.311	contig535543_82
1	48.311	contig46862_57
1	48.311	contig66249_115
1	48.311	contig25808_175
1	48.311	contig38463_76
1	49.321	contig15608_77
1	49.321	contig46862_40
1	49.321	contig434348_73
1	49.321	contig561612_102
1	49.321	contig434348_26
1	50.844	contig15608_167
1	50.844	contig46862_203
1	50.844	contig46862_154
1	50.844	contig66249_66
1	50.844	contig46862_37
1	51.095	contig25808_223
1	51.095	contig404765_119
1	51.345	contig356885_80
1	51.345	contig356885_29
1	51.345	contig25808_119
1	51.596	contig819321_62
1	53.377	contig25808_218
1	53.377	contig970105_32
1	53.377	contig970105_43
1	53.377	contig970105_23
1	53.377	contig819321_84
1	53.377	contig47208_227
1	53.377	contig819321_70
1	54.133	contig47208_2
1	54.133	contig47208_146
1	54.133	contig47208_121
1	54.133	contig47208_189
1	54.133	contig47208_178
1	54.133	contig47208_201
1	54.133	contig47208_157
1	54.133	contig47208_207
1	54.133	contig47208_176
1	54.133	contig47208_221
1	54.133	contig47208_196
1	54.133	contig47208_149
1	54.133	contig47208_145
1	55.143	contig30570_124
1	55.143	contig30570_8
1	55.143	contig624313_118
1	55.143	contig30570_119
1	55.143	contig47208_105
1	55.143	contig47208_237
1	55.143	contig30570_53
1	55.143	contig16726_122
1	55.143	contig30570_11
1	56.153	contig625697_86
1	56.153	contig57968_152
1	56.153	contig49696_121
1	56.153	contig625697_61
1	56.153	contig625697_85
1	56.153	contig623889_71
1	56.153	contig625697_62
1	56.153	contig57968_159
1	57.164	contig889690_203
1	57.414	contig889690_202
1	57.665	contig623889_31
1	57.665	contig57968_161
1	57.915	contig623889_92
1	58.166	contig699342_36
1	59.176	contig18437_129
1	59.176	contig18437_87
1	59.176	contig49696_108
1	59.932	contig18437_109
1	60.182	contig18437_119
1	60.433	contig716842_94
1	60.433	contig716842_23
1	60.433	contig716842_63
1	61.443	contig278927_39
1	61.443	contig11078_222
1	61.443	contig11078_180
1	61.946	contig521309_107
1	61.946	contig11826_113
1	61.946	contig521309_157
1	61.946	contig708267_73
1	61.946	contig11826_162
1	61.946	contig69671_65
1	61.946	contig11826_218
1	61.946	contig278927_6
1	62.196	contig372676_56
1	62.196	contig487800_47
1	62.196	contig708267_31
1	62.196	contig69671_251
1	62.196	contig11826_263
1	62.196	contig372676_98
1	62.196	contig45787_65
1	62.196	contig487800_81
1	62.196	contig785723_33
1	62.196	contig785723_50
1	62.196	contig11826_92
1	62.196	contig393806_87
1	62.196	contig785723_37
1	62.196	contig606865_8
1	62.196	contig372676_95
1	62.196	contig785723_39
1	62.447	contig45787_17
1	62.447	contig45787_142
1	62.447	contig572755_31
1	62.447	contig45787_137
1	62.447	contig45787_61
1	62.447	contig45787_187
1	62.447	contig372676_131
1	62.447	contig45787_210
1	62.447	contig45787_35
1	62.447	contig487800_82
1	62.447	contig45787_156
1	62.447	contig487800_110
1	62.447	contig487800_54
1	62.95	contig774368_184
1	62.95	contig774368_114
1	63.452	contig774368_78
1	64.462	contig44815_139
1	64.462	contig22873_176
1	64.462	contig55156_154
1	64.462	contig55078_51
1	64.462	contig495158_30
1	64.462	contig55156_136
1	64.462	contig22873_41
1	64.462	contig46536_53
1	64.462	contig42624_50
1	64.462	contig51411_180
1	64.462	contig51411_238
1	64.462	contig46536_26
1	64.462	contig22873_66
1	64.462	contig55078_183
1	64.462	contig581556_65
1	64.462	contig42624_28
1	64.462	contig55078_62
1	64.462	contig55156_149
1	64.462	contig55078_63
1	64.462	contig24900_39
1	64.462	contig41783_6
1	64.462	contig35175_94
1	64.462	contig41783_268
1	64.462	contig46536_74
1	64.462	contig51411_171
1	64.462	contig55078_105
1	64.462	contig58311_24
1	64.462	contig51411_166
1	64.462	contig627356_47
1	64.713	contig7174_93
1	64.713	contig1527_118
1	64.713	contig729237_70
1	64.713	contig699690_112
1	64.713	contig1527_255
1	64.713	contig7174_38
1	64.713	contig42409_130
1	64.713	contig42409_190
1	64.713	contig1527_22
1	64.713	contig726248_179
1	64.713	contig7174_156
1	64.713	contig42409_32
1	64.713	contig46972_54
1	64.713	contig54590_43
1	64.713	contig42409_65
1	64.713	contig42409_94
1	64.713	contig42409_85
1	64.713	contig26089_179
1	64.713	contig726248_112
1	64.963	contig55078_61
1	64.963	contig726248_70
1	64.963	contig55078_151
1	64.963	contig18865_87
1	64.963	contig55078_168
1	64.963	contig814328_10
1	64.963	contig602139_39
1	64.963	contig26089_163
1	64.963	contig7174_167
1	64.963	contig42624_18
1	64.963	contig30205_25
1	64.963	contig7174_174
1	64.963	contig55156_112
1	64.963	contig783106_102
1	64.963	contig581556_137
1	64.963	contig16107_89
1	64.963	contig42409_234
1	64.963	contig55156_17
1	64.963	contig1527_268
1	64.963	contig46536_168
1	64.963	contig495158_73
1	64.963	contig581556_47
1	64.963	contig55078_147
1	64.963	contig51411_76
1	64.963	contig5005_3
1	65.466	contig783106_116
1	65.466	contig42624_36
1	65.466	contig22873_108
1	65.466	contig55078_161
1	65.466	contig46972_86
1	65.466	contig783106_189
1	65.466	contig55078_173
1	65.466	contig18865_54
1	65.466	contig602139_51
1	65.466	contig672213_58
1	65.466	contig4439_198
1	65.466	contig602139_128
1	65.466	contig5005_82
1	65.466	contig783106_177
1	65.466	contig11438_30
1	65.466	contig5005_52
1	65.717	contig113_44
1	65.717	contig602728_32
1	65.717	contig729514_73
1	65.717	contig45097_167
1	65.717	contig30205_28
1	65.717	contig30205_31
1	65.717	contig45097_155
1	65.717	contig15702_76
1	65.717	contig518468_19
1	65.717	contig30205_237
1	65.717	contig16107_203
1	65.717	contig45097_240
1	66.472	contig4439_128
1	66.472	contig4439_245
1	66.472	contig502675_112
1	66.975	contig386668_71
1	66.975	contig53771_142
1	66.975	contig76932_42
1	66.975	contig386668_116
1	67.225	contig53771_153
1	67.981	contig33362_92
1	67.981	contig27193_97
1	67.981	contig16749_83
1	68.232	contig33362_7
1	72.13	contig964449_39
1	72.38	contig570560_34
1	72.38	contig570560_43
1	72.631	contig570560_94
1	72.631	contig66689_162
1	72.631	contig781828_129
1	72.631	contig15198_87
1	72.631	contig964449_45
1	72.631	contig84792_92
1	72.631	contig15198_159
1	72.631	contig15198_75
1	72.631	contig964449_43
1	72.631	contig415548_26
1	72.631	contig15198_143
1	72.631	contig56874_167
1	72.631	contig66689_185
1	72.631	contig17319_61
1	72.631	contig76044_10
1	72.631	contig42809_215
1	72.631	contig17319_38
1	72.631	contig8546_54
1	72.631	contig372731_57
1	72.631	contig781828_35
1	72.631	contig781828_41
1	72.631	contig31628_194
1	72.631	contig66689_181
1	72.631	contig578595_129
1	72.631	contig531123_135
1	72.631	contig531123_182
1	72.631	contig531123_106
1	72.631	contig25293_89
1	72.631	contig578595_19
1	72.631	contig41989_132
1	72.631	contig578595_15
1	72.631	contig578595_2
1	72.631	contig33362_183
1	72.631	contig531123_46
1	72.631	contig16749_93
1	72.631	contig16749_144
1	72.631	contig33362_107
1	72.631	contig800030_37
1	72.631	contig545287_67
1	72.631	contig28935_115
1	72.631	contig41989_76
1	72.631	contig41989_77
1	72.631	contig583544_29
1	72.631	contig33362_34
1	72.631	contig583544_86
1	72.631	contig800030_92
1	72.631	contig53771_170
1	72.631	contig33362_167
1	72.631	contig86515_48
1	72.631	contig800030_137
1	72.631	contig53771_113
1	72.631	contig730930_62
1	72.631	contig730930_95
1	73.641	contig426585_54
1	73.641	contig426585_57
1	73.641	contig426585_43
1	73.641	contig426585_63
1	74.144	contig295020_8
1	74.144	contig42809_204
1	74.144	contig494054_46
1	74.144	contig70326_99
1	74.144	contig807242_126
1	74.144	contig76044_43
1	74.144	contig28038_81
1	74.144	contig76044_81
1	74.144	contig3166_128
1	74.144	contig84792_182
1	74.144	contig42809_53
1	74.144	contig41089_241
1	74.144	contig8546_208
1	74.144	contig749256_88
1	74.144	contig3166_26
1	74.144	contig76044_173
1	74.144	contig42809_229
1	74.144	contig42809_160
1	74.144	contig41089_218
1	74.144	contig21169_136
1	74.144	contig42809_211
1	74.144	contig3166_82
1	74.144	contig41089_164
1	74.144	contig41089_6
1	74.144	contig56874_145
1	74.144	contig42809_213
1	74.144	contig401834_63
1	74.144	contig56874_47
1	74.144	contig84792_164
1	74.144	contig56874_144
1	74.144	contig51386_78
1	74.144	contig56874_115
1	75.41	contig3800_129
1	75.41	contig42626_82
1	75.41	contig42626_17
1	75.41	contig42626_3
1	75.41	contig54597_149
1	75.41	contig42626_62
1	75.41	contig42626_54
1	75.41	contig74052_51
1	75.41	contig2087_78
1	75.41	contig42626_207
1	75.41	contig2087_76
1	75.41	contig2087_275
1	75.41	contig70752_9
1	75.41	contig70752_48
1	75.41	contig2087_79
1	75.41	contig70752_99
1	75.41	contig54597_84
1	75.41	contig54597_143
1	75.41	contig779353_46
1	75.41	contig2087_50
1	75.41	contig54597_92
1	75.41	contig2087_207
1	75.41	contig2087_258
1	75.41	contig54597_110
1	75.41	contig70326_117
1	75.41	contig2087_189
1	75.41	contig54597_162
1	75.41	contig54597_72
1	75.41	contig54597_48
1	75.41	contig54597_170
1	75.41	contig94075_250
1	75.41	contig94075_253
1	75.41	contig54597_126
1	75.41	contig54597_161
1	75.912	contig53479_21
1	75.912	contig53479_65
1	75.912	contig70752_145
1	75.912	contig53479_40
1	75.912	contig555417_9
1	75.912	contig53479_112
1	75.912	contig53479_168
1	76.668	contig555417_150
1	76.668	contig25715_19
1	76.668	contig555417_149
1	77.423	contig46376_218
1	78.179	contig636477_79
1	78.179	contig25892_28
1	78.179	contig10351_27
1	78.179	contig10351_72
1	78.179	contig53387_92
1	78.179	contig10351_82
1	78.179	contig51854_103
1	78.179	contig577826_143
1	78.179	contig699004_87
1	78.179	contig699004_30
1	78.179	contig25892_248
1	78.179	contig215_35
1	78.179	contig636477_56
1	78.179	contig577826_106
1	78.179	contig636477_67
1	78.43	contig53387_122
1	78.43	contig9607_26
1	78.43	contig596833_24
1	78.43	contig49433_135
1	78.43	contig8075_136
1	78.43	contig699004_66
1	78.43	contig49433_49
1	78.43	contig53820_35
1	78.43	contig224279_24
1	78.43	contig8075_207
1	78.43	contig215_27
1	78.43	contig53820_67
1	78.43	contig49433_137
1	78.43	contig8075_203
1	78.43	contig36899_16
1	78.68	contig8075_143
1	78.68	contig215_105
1	78.68	contig8075_212
1	78.68	contig8075_144
1	78.68	contig8075_215
1	78.68	contig8075_222
1	78.68	contig8075_217
1	78.68	contig8075_220
1	78.68	contig501492_180
1	78.68	contig286430_78
1	78.68	contig8075_214
1	78.68	contig50207_45
1	78.68	contig840657_218
1	78.68	contig511045_96
1	78.68	contig511045_139
1	78.68	contig50207_158
1	78.68	contig41542_41
1	78.68	contig15532_168
1	78.68	contig41542_92
1	78.68	contig41542_58
1	78.68	contig41542_199
1	78.68	contig23073_32
1	78.68	contig840657_176
1	78.68	contig35942_34
1	78.68	contig36899_100
1	78.68	contig50207_230
1	78.68	contig50207_181
1	78.68	contig41542_124
1	78.68	contig35942_33
1	78.68	contig840657_164
1	78.68	contig35942_115
1	78.68	contig53820_108
1	78.68	contig701481_66
1	78.68	contig840657_183
1	78.68	contig15532_138
1	78.68	contig447852_155
1	78.68	contig447852_106
1	78.68	contig15532_166
1	78.931	contig59445_238
1	79.182	contig35942_81
1	79.182	contig18085_98
1	79.182	contig35942_17
1	79.182	contig563900_51
1	79.182	contig641679_111
1	79.182	contig563900_80
1	79.182	contig501492_195
1	79.182	contig20070_30
1	79.182	contig840657_59
1	79.182	contig20070_16
1	79.182	contig641679_119
1	79.182	contig38710_66
1	79.182	contig641679_102
1	79.182	contig641679_142
1	79.182	contig38710_109
1	79.182	contig563900_66
1	79.182	contig641679_88
1	79.432	contig13520_180
1	79.432	contig470338_157
1	79.432	contig17756_187
1	79.432	contig470338_169
1	79.432	contig22060_2
1	79.432	contig22060_59
1	79.432	contig17756_46
1	79.432	contig211828_80
1	79.432	contig470338_136
1	79.432	contig470338_170
1	79.432	contig17756_202
1	79.432	contig22060_92
1	79.432	contig17756_180
1	79.432	contig13520_149
1	79.432	contig17756_124
1	79.432	contig22060_72
1	79.432	contig14787_157
1	79.432	contig14787_176
1	79.432	contig470338_25
1	79.432	contig13520_141
1	79.432	contig4550_23
1	79.432	contig14787_139
1	79.683	contig17756_203
1	79.683	contig79196_46
1	79.683	contig79196_148
1	79.683	contig17756_73
1	79.683	contig79196_57
1	79.683	contig470338_106
1	79.683	contig4064_129
1	79.683	contig522050_87
1	79.683	contig49293_233
1	79.683	contig17756_157
1	79.683	contig49293_216
1	79.683	contig43029_112
1	79.683	contig79196_170
1	79.683	contig4064_178
1	79.683	contig49293_85
1	79.683	contig470338_134
1	79.683	contig13520_166
1	79.683	contig17756_179
1	79.683	contig13520_64
1	79.683	contig17756_175
1	79.683	contig470338_92
1	79.683	contig20070_104
1	79.683	contig470338_125
1	79.683	contig79196_191
1	79.683	contig49293_4
1	79.683	contig79196_68
1	79.683	contig522050_86
1	79.683	contig49293_219
1	79.934	contig740267_15
1	79.934	contig42237_189
1	79.934	contig42237_132
1	79.934	contig10923_4
1	79.934	contig21634_152
1	79.934	contig782027_87
1	79.934	contig522764_130
1	79.934	contig79196_185
1	79.934	contig42237_209
1	79.934	contig841515_93
1	79.934	contig43029_39
1	79.934	contig841515_85
1	79.934	contig10923_172
1	79.934	contig43029_3
1	79.934	contig4545_64
1	79.934	contig10923_191
1	79.934	contig10923_206
1	79.934	contig43487_68
1	79.934	contig21634_53
1	79.934	contig522764_161
1	79.934	contig21634_169
1	79.934	contig497442_10
1	79.934	contig43487_107
1	79.934	contig10923_65
1	79.934	contig823810_117
1	79.934	contig10923_122
1	80.184	contig32442_89
1	80.184	contig10923_186
1	80.184	contig32442_51
1	80.184	contig21634_62
1	80.184	contig43487_65
1	80.184	contig607605_48
1	80.184	contig841515_95
1	80.184	contig37982_77
1	80.184	contig32442_47
1	80.184	contig32442_96
1	80.184	contig607605_120
1	80.435	contig43487_177
1	80.435	contig43487_201
1	80.685	contig30807_25
1	80.685	contig4545_34
1	80.685	contig499528_7
1	80.685	contig55043_263
1	80.685	contig4545_96
1	80.685	contig611117_32
1	80.685	contig459339_50
1	80.685	contig55043_240
1	80.685	contig499528_45
1	80.685	contig462760_59
1	80.685	contig16466_24
1	80.685	contig19056_238
1	80.685	contig37982_17
1	80.685	contig4545_58
1	80.685	contig692706_142
1	80.685	contig462760_68
1	80.685	contig49904_133
1	80.685	contig679975_56
1	80.936	contig740210_88
1	80.936	contig499528_53
1	80.936	contig19049_248
1	80.936	contig49904_172
1	80.936	contig740210_79
1	80.936	contig740210_170
1	80.936	contig740210_77
1	80.936	contig740210_18
1	81.187	contig19049_42
1	81.187	contig35799_186
1	81.187	contig692706_65
1	81.187	contig19049_225
1	81.187	contig55043_164
1	81.187	contig720665_113
1	81.187	contig35799_233
1	81.187	contig692706_140
1	81.187	contig11049_99
1	81.187	contig740210_236
1	81.187	contig19056_91
1	81.187	contig19049_224
1	81.187	contig740210_23
1	81.187	contig19049_50
1	81.187	contig35799_96
1	81.187	contig19049_65
1	81.187	contig19049_118
1	81.437	contig611117_97
1	81.437	contig454690_25
1	81.437	contig16466_45
1	81.437	contig499528_157
1	81.688	contig683959_181
1	81.688	contig702402_58
1	81.688	contig459339_116
1	81.688	contig720665_72
1	81.688	contig702402_129
1	81.688	contig451_130
1	81.688	contig49904_112
1	81.688	contig29397_139
1	81.688	contig683959_155
1	81.688	contig55043_81
1	81.688	contig42821_107
1	81.688	contig611117_52
1	81.688	contig49904_207
1	81.688	contig16466_153
1	81.688	contig29397_140
1	81.939	contig451_192
1	82.949	contig782928_59
1	83.199	contig782928_103
1	83.199	contig702402_46
1	83.199	contig702402_151
1	83.955	contig782928_34
1	85.221	contig41673_142
1	85.472	contig49162_132
1	85.472	contig49162_151
1	85.472	contig49162_149
1	85.472	contig12845_67
1	85.472	contig45034_12
1	85.472	contig49162_98
1	85.472	contig49162_97
1	85.722	contig45034_41
1	85.722	contig12845_91
1	85.722	contig45034_114
1	86.478	contig602330_127
1	86.478	contig602330_52
1	86.478	contig52906_173
1	86.728	contig602330_229
1	86.979	contig602330_47
1	91.695	contig1577_113
1	91.695	contig8877_22
1	91.695	contig1577_89
1	91.695	contig1577_194
1	92.45	contig47978_6
1	92.45	contig47978_211
1	92.45	contig47978_123
1	94.232	contig37925_22
1	94.232	contig37925_107
1	94.734	contig37925_187
1	96.775	contig40899_20
1	96.775	contig3957_46
1	96.775	contig3957_6
1	96.775	contig3957_113
1	98.041	contig3957_127
1	98.292	contig40899_119
1	99.302	contig256682_8
1	99.302	contig256682_22
1	102.396	contig472423_123
1	102.396	contig68869_165
1	102.396	contig720849_207
1	102.396	contig68869_21
1	102.396	contig68869_14
1	102.396	contig68869_24
1	102.396	contig472423_156
1	102.396	contig720849_166
1	102.396	contig68869_206
1	102.396	contig720849_177
1	102.396	contig68869_170
1	102.396	contig23345_204
1	102.396	contig23345_151
1	102.396	contig68869_143
1	102.396	contig68869_167
1	102.396	contig472423_39
1	102.396	contig68869_149
1	102.396	contig68869_85
1	102.396	contig68869_227
1	102.396	contig68869_177
1	102.396	contig68869_164
1	102.396	contig68869_163
1	102.646	contig720849_120
1	102.646	contig23345_176
1	102.646	contig68869_16
1	102.646	contig472423_162
1	102.646	contig23345_140
1	102.646	contig720849_172
1	102.646	contig720849_149
1	102.646	contig23345_118
1	102.646	contig23345_109
1	102.646	contig23345_184
1	102.646	contig23345_145
1	102.646	contig23345_166
1	103.402	contig293882_94
1	103.402	contig13817_105
1	103.402	contig293882_93
1	103.653	contig815570_170
1	103.653	contig774955_186
1	103.653	contig774955_2
1	103.653	contig774955_56
1	103.653	contig774955_67
1	103.653	contig13817_93
1	103.653	contig13817_11
1	107.822	contig13817_6
1	108.324	contig383171_112
1	108.324	contig383171_51
1	108.324	contig383171_87
1	108.827	contig31619_187
1	108.827	contig31619_196
1	108.827	contig31619_206
1	108.827	contig31619_21
1	109.077	contig33326_11
1	109.328	contig344406_28
1	109.328	contig580308_16
1	109.328	contig834881_179
1	109.328	contig580308_14
1	109.328	contig580308_24
1	109.328	contig6292_152
1	109.328	contig23916_191
1	109.328	contig23916_147
1	109.328	contig344406_17
1	109.579	contig617952_62
1	109.579	contig484024_71
1	109.579	contig59606_36
1	109.579	contig568094_44
1	109.579	contig206777_98
1	109.579	contig59606_39
1	109.579	contig39271_191
1	109.579	contig568094_5
1	109.579	contig39271_2
1	109.579	contig833960_38
1	109.579	contig554988_50
1	109.579	contig554988_154
1	109.579	contig39271_135
1	109.579	contig815570_108
1	109.579	contig780631_12
1	109.829	contig276401_27
1	109.829	contig815570_79
1	109.829	contig55643_52
1	109.829	contig206777_37
1	109.829	contig39271_189
1	109.829	contig42901_126
1	109.829	contig554988_9
1	109.829	contig383171_100
1	109.829	contig815570_109
1	109.829	contig31619_61
1	109.829	contig56292_59
1	109.829	contig617952_194
1	109.829	contig31619_34
1	109.829	contig815570_145
1	109.829	contig54386_111
1	109.829	contig42901_96
1	109.829	contig42901_106
1	110.08	contig54386_116
1	110.08	contig833421_139
1	110.08	contig833421_33
1	110.08	contig33101_115
1	110.08	contig617952_94
1	110.08	contig54386_105
1	110.582	contig833421_35
1	111.085	contig33101_17
1	111.085	contig12932_126
1	111.085	contig675580_148
1	111.085	contig55643_159
1	111.085	contig523019_112
1	111.085	contig33101_8
1	113.65	contig523019_64
1	113.65	contig12932_162
1	113.65	contig12932_144
1	113.65	contig55643_247
1	115.691	contig383171_83
1	116.701	contig55643_229
1	116.701	contig55643_206
1	116.701	contig55643_232
1	133.474	contig78646_33
1	133.474	contig78646_116
1	147.526	contig469_104
1	147.526	contig469_200
1	158.062	contig3286_194
1	158.818	contig45545_179
1	159.069	contig658660_14
1	160.079	contig2785_190
1	160.581	contig33850_150
1	160.581	contig38211_94
1	160.581	contig978544_61
1	160.581	contig33850_178
1	160.581	contig33850_145
1	160.581	contig28319_239
1	160.832	contig3286_63
1	160.832	contig41284_202
1	160.832	contig33850_70
1	160.832	contig45545_230
1	160.832	contig41284_203
1	160.832	contig45545_223
1	160.832	contig45545_222
1	160.832	contig3286_236
1	160.832	contig45545_227
1	161.083	contig41284_135
1	161.083	contig3286_227
1	161.083	contig3286_234
1	161.083	contig3286_220
1	161.083	contig31606_186
1	161.838	contig68905_167
1	162.594	contig54531_108
1	162.594	contig54531_141
1	162.594	contig54531_78
1	162.594	contig54531_253
1	162.594	contig54531_242
1	162.594	contig54531_87
1	162.594	contig14927_274
1	162.594	contig54531_185
1	162.594	contig68905_223
1	162.594	contig68905_175
1	162.594	contig884999_12
1	162.594	contig14927_205
1	162.594	contig68905_178
1	162.594	contig14927_70
1	162.594	contig71349_48
1	162.594	contig14927_103
1	162.594	contig25165_216
1	162.845	contig51826_147
1	162.845	contig40568_120
1	162.845	contig423427_13
1	162.845	contig51826_28
1	162.845	contig51826_81
1	162.845	contig40568_114
1	162.845	contig834602_150
1	163.347	contig533857_175
1	163.347	contig533857_189
1	163.347	contig545223_26
1	163.347	contig533857_188
1	163.598	contig398333_78
1	163.598	contig55714_156
1	163.598	contig55714_153
1	163.598	contig624746_14
1	163.598	contig55714_84
1	163.598	contig35864_14
1	163.598	contig14548_109
1	163.598	contig55714_173
1	163.848	contig54531_232
1	163.848	contig14548_113
1	163.848	contig54531_193
1	163.848	contig55714_90
1	164.099	contig475448_70
1	164.099	contig28804_36
1	164.099	contig475448_179
1	164.099	contig28804_82
1	164.35	contig24388_15
1	164.35	contig93410_168
1	164.35	contig478166_54
1	164.35	contig24388_102
1	164.35	contig478166_77
1	164.35	contig478166_97
1	164.35	contig24388_180
1	164.35	contig24388_183
1	164.35	contig24388_113
1	164.35	contig93410_47
1	164.35	contig470597_11
1	164.35	contig650817_19
1	164.35	contig35184_35
1	164.35	contig538960_25
1	164.35	contig24388_73
1	164.35	contig93410_115
1	164.35	contig650817_75
1	164.35	contig93410_52
1	164.6	contig76722_5
1	164.6	contig650817_152
1	164.6	contig47610_181
1	164.6	contig4867_197
1	164.6	contig4867_14
1	164.6	contig185682_16
1	164.6	contig47610_34
1	164.6	contig185682_174
1	164.6	contig185682_54
1	164.6	contig650817_44
1	164.6	contig76722_111
1	164.851	contig12891_14
1	164.851	contig12891_108
1	164.851	contig729309_66
1	164.851	contig31494_229
1	165.353	contig21381_177
1	165.353	contig32494_174
1	165.353	contig21381_23
1	165.353	contig715976_105
1	165.353	contig32494_5
1	165.353	contig32494_227
1	165.353	contig21381_127
1	165.353	contig32494_125
1	165.353	contig21381_173
1	165.353	contig21381_90
1	165.353	contig32494_61
1	165.353	contig715976_86
1	165.353	contig20366_35
1	165.353	contig21381_63
1	165.353	contig715976_78
1	165.604	contig21381_183
1	165.855	contig42093_100
1	165.855	contig4867_60
1	165.855	contig185682_5
1	165.855	contig47163_134
1	165.855	contig24388_166
1	165.855	contig724673_96
1	165.855	contig24388_175
1	165.855	contig47163_89
1	165.855	contig47163_95
1	165.855	contig724467_131
1	165.855	contig680700_36
1	165.855	contig713410_129
1	165.855	contig674020_122
1	165.855	contig14548_7
1	165.855	contig538960_97
1	165.855	contig24388_92
1	165.855	contig724673_68
1	165.855	contig185682_171
1	165.855	contig724673_26
1	165.855	contig37972_135
1	165.855	contig713410_70
1	165.855	contig53398_16
1	165.855	contig486851_41
1	165.855	contig674020_65
1	165.855	contig93410_23
1	165.855	contig14548_131
1	165.855	contig713410_95
1	165.855	contig21381_70
1	165.855	contig80747_71
1	165.855	contig21381_203
1	165.855	contig729309_72
1	165.855	contig21381_71
1	165.855	contig724673_170
1	165.855	contig538960_85
1	165.855	contig713410_67
1	165.855	contig650817_144
1	165.855	contig713410_153
1	165.855	contig32494_140
1	165.855	contig24388_74
1	166.105	contig29567_188
1	166.105	contig822520_97
1	166.105	contig64197_148
1	166.105	contig29567_108
1	166.105	contig800160_31
1	166.105	contig29567_88
1	166.105	contig650817_95
1	166.105	contig28928_150
1	166.105	contig30242_176
1	166.105	contig64197_198
1	166.105	contig64197_36
1	166.105	contig43231_62
1	166.105	contig62153_81
1	166.105	contig40207_240
1	166.105	contig30242_66
1	166.105	contig64197_146
1	166.105	contig822520_166
1	166.105	contig62153_124
1	166.105	contig62153_77
1	166.105	contig43231_84
1	166.105	contig16946_259
1	166.105	contig30242_174
1	166.105	contig24601_228
1	166.105	contig30242_161
1	166.105	contig62153_152
1	166.105	contig552703_9
1	166.105	contig51042_127
1	166.105	contig64197_7
1	166.105	contig635280_196
1	166.105	contig16946_103
1	166.105	contig30242_179
1	166.356	contig687360_153
1	166.356	contig811505_52
1	166.356	contig795465_203
1	166.356	contig494491_83
1	166.356	contig53238_106
1	166.356	contig930035_127
1	166.356	contig9749_15
1	166.356	contig930035_168
1	166.356	contig51042_176
1	166.356	contig51042_158
1	166.356	contig930035_159
1	166.356	contig552703_46
1	166.607	contig7344_26
1	166.607	contig9749_93
1	166.607	contig832184_138
1	166.607	contig697348_56
1	166.607	contig494491_110
1	166.607	contig645987_11
1	166.607	contig635280_74
1	166.607	contig69269_198
1	166.607	contig409218_81
1	166.607	contig252292_39
1	166.607	contig645987_40
1	166.607	contig24601_268
1	166.607	contig7077_152
1	166.607	contig9749_14
1	166.607	contig37053_224
1	166.607	contig36172_9
1	166.607	contig49084_109
1	166.607	contig29567_156
1	166.607	contig521701_34
1	166.607	contig500313_98
1	166.607	contig430163_146
1	166.607	contig38319_274
1	166.607	contig28636_94
1	166.607	contig48690_85
1	166.607	contig495891_31
1	166.607	contig37053_196
1	166.607	contig635280_232
1	166.607	contig687360_117
1	166.607	contig26532_9
1	166.607	contig447263_33
1	166.607	contig28636_99
1	166.607	contig28636_138
1	166.607	contig49084_119
1	166.607	contig40356_226
1	166.607	contig49084_169
1	166.607	contig28928_256
1	166.607	contig43231_179
1	166.607	contig64197_132
1	166.607	contig687360_123
1	166.607	contig16946_233
1	166.607	contig24378_158
1	166.607	contig40207_270
1	166.607	contig28928_118
1	166.607	contig495891_133
1	166.607	contig32239_106
1	166.607	contig64197_177
1	166.607	contig32239_206
1	166.607	contig64197_227
1	166.607	contig49084_199
1	166.607	contig28636_75
1	166.607	contig28928_3
1	166.607	contig16946_179
1	166.607	contig430163_128
1	166.607	contig28928_139
1	166.607	contig28928_77
1	166.607	contig16946_173
1	166.607	contig28636_101
1	166.607	contig667406_131
1	166.607	contig64197_84
1	166.607	contig495891_180
1	166.607	contig40207_16
1	166.607	contig247250_30
1	166.607	contig40207_91
1	166.607	contig40207_17
1	166.607	contig24601_114
1	166.607	contig28636_164
1	166.607	contig24378_234
1	166.607	contig428703_77
1	166.607	contig428703_69
1	166.607	contig447263_10
1	166.607	contig24601_116
1	166.607	contig30242_10
1	166.607	contig16946_116
1	166.607	contig28636_151
1	166.607	contig9868_169
1	166.607	contig49084_89
1	166.607	contig37053_197
1	166.607	contig64197_47
1	166.607	contig37053_164
1	166.607	contig32239_135
1	166.607	contig32239_94
1	166.607	contig16946_37
1	166.607	contig24378_81
1	166.607	contig46939_196
1	166.607	contig40207_15
1	166.607	contig645987_10
1	166.607	contig16946_161
1	166.607	contig16946_59
1	166.607	contig635280_84
1	166.607	contig494491_65
1	167.109	contig37186_192
1	167.36	contig16499_145
1	167.36	contig697348_36
1	167.36	contig16499_166
1	167.36	contig500313_144
1	167.36	contig16499_229
1	167.36	contig500313_149
1	167.36	contig16499_110
1	167.36	contig697348_85
1	168.37	contig16499_233
1	168.37	contig16499_167
1	168.37	contig680553_106
1	168.37	contig16499_165
1	168.37	contig63549_73
1	168.37	contig18384_11
1	168.37	contig830119_25
1	168.37	contig16499_161
1	168.37	contig16499_116
1	168.37	contig38261_223
1	168.37	contig311215_185
1	168.37	contig16499_163
1	168.37	contig28416_118
1	168.37	contig2736_155
1	168.37	contig48690_43
1	168.37	contig40801_113
1	168.37	contig18384_130
1	168.37	contig49019_115
1	168.37	contig376779_135
1	168.37	contig18384_54
1	168.37	contig16499_146
1	168.37	contig16499_44
1	168.37	contig18384_28
1	168.872	contig2736_135
1	168.872	contig40513_131
1	168.872	contig2736_182
1	168.872	contig149020_40
1	168.872	contig621595_91
1	168.872	contig38261_176
1	168.872	contig49019_56
1	168.872	contig32240_208
1	168.872	contig7385_115
1	168.872	contig40801_161
1	168.872	contig7385_165
1	168.872	contig2736_148
1	168.872	contig28416_69
1	168.872	contig7385_162
1	168.872	contig2736_40
1	168.872	contig607724_127
1	168.872	contig18384_137
1	168.872	contig7385_111
1	168.872	contig238402_182
1	168.872	contig53127_207
1	168.872	contig2736_88
1	168.872	contig32240_74
1	168.872	contig6827_174
1	168.872	contig2346_51
1	168.872	contig32240_102
1	168.872	contig32240_101
1	168.872	contig621595_95
1	168.872	contig28416_57
1	168.872	contig38261_253
1	168.872	contig6827_166
1	168.872	contig2736_30
1	168.872	contig32240_93
1	168.872	contig53127_179
1	168.872	contig32240_204
1	168.872	contig28416_93
1	168.872	contig31823_15
1	168.872	contig469_27
1	168.872	contig2736_70
1	169.123	contig714057_87
1	169.123	contig149020_17
1	169.123	contig607724_21
1	169.625	contig595069_10
1	169.625	contig714057_88
1	169.625	contig436983_51
1	169.625	contig607724_43
1	169.625	contig81574_45
1	169.625	contig607724_135
1	169.625	contig714057_23
1	169.625	contig607724_8
1	170.128	contig515036_129
1	170.128	contig427667_110
1	170.63	contig28115_101
1	170.63	contig9560_67
1	170.63	contig550508_87
1	170.63	contig44313_88
1	170.63	contig671208_92
1	170.63	contig11954_73
1	170.63	contig19532_101
1	170.63	contig541048_9
1	170.63	contig569779_121
1	170.63	contig841128_58
1	170.63	contig19532_74
1	170.63	contig18310_39
1	170.63	contig81574_115
1	170.881	contig569779_24
1	170.881	contig34359_188
1	170.881	contig595069_85
1	170.881	contig515036_60
1	170.881	contig33231_158
1	170.881	contig595069_102
1	171.132	contig727359_90
1	171.132	contig16573_181
1	171.132	contig12399_4
1	171.132	contig978600_37
1	171.132	contig28115_211
1	171.132	contig19337_26
1	171.132	contig34359_232
1	171.132	contig16573_176
1	171.132	contig16573_152
1	171.132	contig569779_149
1	171.382	contig19532_150
1	171.382	contig541048_3
1	171.382	contig20960_197
1	171.382	contig570759_99
1	171.382	contig541048_109
1	171.382	contig20960_63
1	171.382	contig44313_87
1	171.382	contig44313_129
1	171.382	contig570759_127
1	171.382	contig44313_24
1	171.382	contig11954_51
1	171.382	contig570759_126
1	171.382	contig550508_6
1	171.885	contig11954_133
1	173.151	contig8038_121
1	173.401	contig434099_36
1	173.401	contig434099_62
1	173.652	contig17853_64
1	173.652	contig50079_31
1	173.652	contig28137_71
1	173.652	contig28137_140
1	173.652	contig17853_46
1	173.652	contig651848_122
1	173.652	contig651848_138
1	173.652	contig28137_38
1	174.155	contig22113_62
1	174.405	contig49718_75
1	174.405	contig49718_5
1	174.908	contig453451_28
1	175.158	contig30844_202
1	175.914	contig25429_19
1	175.914	contig25429_105
1	175.914	contig653177_86
1	175.914	contig25429_244
1	175.914	contig653177_41
1	175.914	contig581208_156
1	175.914	contig25429_253
1	176.165	contig3783_140
1	176.165	contig581208_121
1	176.165	contig3783_139
1	176.165	contig3783_115
1	176.165	contig3783_106
1	177.175	contig18150_158
1	177.175	contig10219_236
1	177.175	contig618362_106
1	177.175	contig33035_178
1	177.175	contig835523_65
1	177.175	contig534621_6
1	177.175	contig10219_145
1	177.175	contig18150_150
1	177.425	contig819049_3
1	180.519	contig33035_202
1	180.519	contig9856_148
1	180.519	contig33035_201
1	180.519	contig81441_63
1	181.529	contig33035_206
1	181.529	contig33035_200
1	181.529	contig493463_71
1	181.529	contig33035_207
1	181.529	contig526481_27
1	181.529	contig835523_24
1	181.529	contig8420_5
1	182.032	contig33035_171
1	183.042	contig618362_80
1	183.042	contig579223_59
1	183.042	contig18989_63
1	183.042	contig493463_101
1	183.544	contig836231_60
1	183.544	contig32481_27
1	183.544	contig55125_43
1	183.544	contig87581_152
1	183.544	contig1769_23
1	183.544	contig490759_40
1	183.544	contig32481_50
1	183.544	contig6095_15
1	183.544	contig591655_16
1	183.544	contig534862_42
1	183.544	contig68599_130
1	183.544	contig55125_13
1	183.544	contig483849_108
1	183.544	contig782526_184
1	183.544	contig87581_172
1	183.544	contig716552_115
1	183.544	contig716552_68
1	183.544	contig55125_61
1	183.544	contig818809_178
1	183.544	contig8420_8
1	183.795	contig890164_170
1	183.795	contig490759_203
1	183.795	contig522648_113
1	183.795	contig32481_263
1	183.795	contig438752_22
1	183.795	contig32481_264
1	184.046	contig782526_168
1	184.046	contig782526_122
1	184.046	contig591807_100
1	184.046	contig47875_85
1	184.296	contig799906_160
1	184.296	contig799906_74
1	184.296	contig66929_9
1	184.296	contig716552_18
1	184.296	contig14487_201
1	184.296	contig26038_91
1	185.052	contig483849_156
1	185.052	contig4092_133
1	185.052	contig29426_110
1	185.052	contig4092_102
1	185.052	contig1896_133
1	186.062	contig51986_68
1	186.062	contig42244_74
1	186.062	contig42244_80
1	186.062	contig55422_279
1	186.062	contig42244_70
1	186.062	contig29455_59
1	186.062	contig48357_47
1	186.062	contig627240_225
1	186.062	contig8513_103
1	186.062	contig819481_66
1	186.062	contig44478_146
1	186.062	contig627240_50
1	186.062	contig819481_114
1	186.062	contig8513_3
1	186.062	contig44478_205
1	186.062	contig44478_178
1	186.062	contig48357_11
1	186.062	contig819481_117
1	186.062	contig781823_105
1	186.062	contig4478_30
1	186.062	contig750306_51
1	186.062	contig453466_80
1	186.062	contig48357_61
1	186.062	contig54577_92
1	186.062	contig20092_87
1	186.062	contig8513_46
1	186.062	contig4478_46
1	186.062	contig44478_201
1	186.062	contig8513_102
1	186.062	contig55422_51
1	186.062	contig255239_147
1	186.062	contig44478_128
1	186.062	contig627240_226
1	186.062	contig20153_86
1	186.062	contig55422_145
1	186.062	contig16814_156
1	186.062	contig54577_265
1	186.062	contig16814_171
1	186.062	contig343860_142
1	186.062	contig255239_119
1	186.062	contig8513_38
1	186.062	contig48357_96
1	186.062	contig42244_130
1	186.062	contig29426_109
1	186.062	contig16814_120
1	186.062	contig255239_79
1	186.062	contig627240_69
1	186.062	contig343860_2
1	186.062	contig16814_153
1	186.062	contig16814_155
1	187.585	contig4092_187
1	187.836	contig48814_171
1	187.836	contig813406_156
1	187.836	contig440520_238
1	187.836	contig103255_116
1	187.836	contig15982_158
1	187.836	contig48814_237
1	187.836	contig28211_21
1	187.836	contig103255_115
1	187.836	contig14309_36
1	187.836	contig103255_42
1	187.836	contig440520_78
1	187.836	contig103255_114
1	187.836	contig343094_64
1	187.836	contig42404_50
1	187.836	contig103255_59
1	187.836	contig14309_33
1	187.836	contig48814_17
1	187.836	contig48814_12
1	187.836	contig103255_13
1	187.836	contig41815_71
1	187.836	contig14309_76
1	187.836	contig14309_44
1	187.836	contig440520_47
1	187.836	contig14309_78
1	188.338	contig47970_22
1	188.338	contig42404_47
1	188.338	contig669223_23
1	188.338	contig47230_143
1	188.338	contig440520_224
1	188.338	contig59048_113
1	188.338	contig813406_48
1	188.338	contig783034_93
1	188.338	contig829947_44
1	188.338	contig84851_186
1	188.589	contig14309_66
1	188.84	contig59048_115
1	189.09	contig6270_97
1	191.131	contig697418_111
1	191.131	contig729022_32
1	191.131	contig654403_135
1	191.382	contig13630_116
1	191.382	contig5028_3
1	191.382	contig5028_44
1	191.382	contig697481_145
1	191.382	contig5028_128
1	191.632	contig4610_219
1	191.632	contig32268_28
1	191.632	contig697481_89
1	191.632	contig13630_158
1	192.135	contig4610_196
1	192.135	contig21970_156
1	192.135	contig4610_184
1	192.135	contig32268_183
1	192.135	contig32268_159
1	192.135	contig487869_66
1	193.145	contig32268_83
1	193.145	contig4610_16
1	193.145	contig21970_88
1	193.145	contig21970_126
1	193.145	contig41756_91
1	193.145	contig678252_9
1	193.396	contig41108_20
1	193.396	contig41756_44
1	193.396	contig41108_19
1	193.396	contig26833_91
1	193.396	contig57492_67
1	193.396	contig41756_86
1	193.396	contig41108_18
1	193.898	contig26833_68
1	193.898	contig41108_147
1	193.898	contig41756_67
1	193.898	contig41756_189
1	193.898	contig41108_127
1	193.898	contig26833_100
1	194.401	contig623372_83
1	194.401	contig4155_66
1	194.401	contig466098_59
1	194.401	contig466098_50
1	194.401	contig45407_41
1	194.401	contig4155_69
1	194.401	contig45407_15
1	194.401	contig466098_70
1	195.667	contig704380_53
1	195.667	contig453387_73
1	195.917	contig609991_89
1	195.917	contig529693_107
1	195.917	contig529693_118
1	195.917	contig45407_102
1	195.917	contig529693_95
1	196.42	contig54317_189
1	196.42	contig54317_38
1	196.42	contig23471_135
1	196.42	contig623372_66
1	197.686	contig4155_23
1	197.936	contig384135_36
1	198.439	contig626613_42
1	198.689	contig643302_42
1	198.689	contig64089_113
1	198.94	contig643302_132
1	199.191	contig23471_151
1	199.191	contig704380_44
1	199.191	contig453387_43
1	199.441	contig80144_85
1	199.441	contig384135_146
1	199.441	contig384135_143
1	199.441	contig23471_35
1	199.441	contig23471_56
1	199.441	contig970314_50
1	199.441	contig23471_58
1	199.692	contig529693_146
1	199.943	contig368540_133
1	199.943	contig368540_87
1	201.209	contig1281_16
1	203.511	contig230345_172
1	203.511	contig230345_7
1	203.511	contig23166_7
1	204.013	contig31388_96
1	204.013	contig31388_215
1	204.013	contig31388_112
1	204.013	contig31388_231
1	204.013	contig31388_109
1	204.013	contig230345_159
1	205.536	contig31388_213
1	205.536	contig31388_171
1	205.536	contig31388_207
1	205.536	contig31388_82
1	205.536	contig31388_184
1	205.536	contig31388_61
1	205.536	contig31388_214
1	205.536	contig31388_34
1	205.536	contig31388_195
1	207.059	contig710332_108
1	207.059	contig710332_33
1	207.059	contig710332_125
1	208.069	contig9337_93
1	209.079	contig60386_86
1	209.079	contig60386_4
1	209.582	contig429527_14
1	209.833	contig282489_23
1	209.833	contig8389_62
1	209.833	contig599016_125
1	209.833	contig397517_20
1	209.833	contig72139_31
1	210.083	contig282489_33
1	210.083	contig72139_18
1	210.083	contig9785_200
1	210.083	contig9785_196
1	210.083	contig72139_4
1	210.083	contig9785_237
1	210.083	contig9785_236
1	210.586	contig54278_54
1	210.586	contig53915_233
1	210.586	contig53915_100
1	210.586	contig19277_40
1	210.586	contig19277_66
1	210.586	contig599016_54
1	210.586	contig53915_40
1	210.836	contig287102_100
1	211.087	contig29079_144
1	211.087	contig28409_25
1	211.087	contig29079_29
1	211.087	contig1695_92
1	211.087	contig13101_126
1	211.087	contig29079_71
1	211.087	contig13101_65
1	211.087	contig29079_16
1	211.087	contig29079_216
1	211.087	contig13101_36
1	211.087	contig29079_195
1	211.338	contig1695_17
1	211.338	contig827797_134
1	211.338	contig671996_66
1	211.338	contig51335_68
1	211.338	contig57708_108
1	211.338	contig57708_163
1	211.338	contig29079_186
1	211.338	contig671996_86
1	211.84	contig287415_13
1	211.84	contig287415_116
1	211.84	contig287415_100
1	211.84	contig53935_68
1	211.84	contig22171_115
1	212.091	contig42978_208
1	212.091	contig287415_94
1	212.091	contig287415_88
1	212.091	contig29802_80
1	212.091	contig22171_178
1	212.091	contig23315_135
1	212.091	contig51335_129
1	212.341	contig22171_211
1	212.341	contig29802_122
1	212.341	contig55055_3
1	212.592	contig55055_98
1	212.592	contig42978_226
1	212.592	contig46807_14
1	213.095	contig46807_67
1	213.095	contig46807_118
1	213.095	contig29802_99
1	213.345	contig14998_74
1	213.345	contig22171_35
1	213.345	contig22171_34
1	213.345	contig29802_16
1	213.345	contig22171_30
1	213.345	contig22171_58
1	214.101	contig3107_78
1	214.101	contig3107_242
2	0	contig23217_60
2	0	contig23217_67
2	0.503	contig634757_111
2	0.503	contig550405_14
2	1.005	contig19785_171
2	1.005	contig795635_125
2	1.256	contig703993_167
2	1.256	contig703993_71
2	1.256	contig634757_157
2	1.256	contig634757_33
2	1.256	contig795635_127
2	1.506	contig634757_117
2	1.757	contig703993_272
2	2.008	contig795635_138
2	2.258	contig773643_17
2	2.258	contig773643_25
2	3.014	contig634757_164
2	4.024	contig662076_156
2	4.024	contig662076_187
2	4.024	contig662076_186
2	5.034	contig662076_146
2	5.034	contig662076_84
2	5.034	contig662076_131
2	5.034	contig662076_149
2	5.79	contig48525_89
2	5.79	contig48525_18
2	6.292	contig48525_132
2	9.121	contig48525_38
2	9.121	contig48525_39
2	9.877	contig744006_27
2	9.877	contig70151_72
2	9.877	contig70151_52
2	9.877	contig70151_40
2	9.877	contig70151_4
2	10.127	contig485206_101
2	10.378	contig602799_36
2	10.378	contig602799_50
2	10.378	contig31155_234
2	10.378	contig602799_105
2	10.378	contig31155_66
2	10.378	contig31155_201
2	10.378	contig31155_28
2	10.378	contig31155_127
2	10.378	contig602799_7
2	11.133	contig54611_4
2	11.133	contig18197_114
2	11.133	contig31155_223
2	11.133	contig10693_49
2	11.133	contig10693_140
2	11.133	contig18197_98
2	11.133	contig812481_47
2	11.133	contig18197_175
2	11.133	contig10693_145
2	11.636	contig18197_181
2	11.636	contig812481_70
2	11.636	contig812481_69
2	11.887	contig44605_93
2	11.887	contig79722_200
2	11.887	contig668313_61
2	11.887	contig18197_126
2	11.887	contig44605_129
2	13.152	contig18197_43
2	13.655	contig46296_142
2	13.655	contig5116_271
2	13.655	contig6439_84
2	13.655	contig5116_143
2	13.655	contig6439_11
2	13.655	contig534714_159
2	13.655	contig49319_103
2	13.655	contig408379_110
2	13.655	contig534714_91
2	13.655	contig6439_78
2	13.906	contig5116_129
2	13.906	contig46296_190
2	13.906	contig5116_124
2	13.906	contig46296_151
2	13.906	contig46296_193
2	13.906	contig534714_6
2	13.906	contig46296_103
2	14.156	contig27788_13
2	14.156	contig27788_60
2	15.166	contig14143_159
2	15.166	contig3828_10
2	15.922	contig14143_2
2	15.922	contig37553_69
2	15.922	contig85_130
2	15.922	contig41279_79
2	15.922	contig85_38
2	15.922	contig39775_24
2	15.922	contig39775_91
2	15.922	contig738700_6
2	15.922	contig85_179
2	15.922	contig738700_96
2	15.922	contig14143_155
2	15.922	contig42129_144
2	15.922	contig85_203
2	15.922	contig685036_104
2	15.922	contig738700_26
2	15.922	contig85_83
2	15.922	contig85_174
2	15.922	contig738700_57
2	15.922	contig85_195
2	15.922	contig85_198
2	15.922	contig85_165
2	15.922	contig85_208
2	15.922	contig306965_24
2	15.922	contig85_187
2	15.922	contig554749_8
2	15.922	contig42129_5
2	15.922	contig738700_50
2	15.922	contig738700_21
2	15.922	contig306965_93
2	15.922	contig738700_176
2	15.922	contig85_190
2	15.922	contig42129_7
2	15.922	contig42129_38
2	15.922	contig738700_22
2	15.922	contig14143_156
2	15.922	contig738700_3
2	15.922	contig85_24
2	16.173	contig42129_93
2	16.423	contig2338_75
2	16.423	contig2338_74
2	17.433	contig435558_8
2	17.684	contig6424_15
2	17.684	contig6424_109
2	17.684	contig435558_6
2	17.684	contig6424_81
2	17.684	contig6424_4
2	17.684	contig554749_58
2	17.684	contig6424_52
2	17.935	contig52907_72
2	18.437	contig28870_109
2	18.688	contig610444_25
2	18.688	contig28870_115
2	18.688	contig40347_141
2	18.688	contig8119_111
2	18.938	contig119895_111
2	18.938	contig40347_208
2	18.938	contig40347_15
2	18.938	contig40347_34
2	18.938	contig40347_195
2	18.938	contig40347_202
2	19.189	contig610444_93
2	19.189	contig610444_33
2	19.692	contig757018_68
2	19.692	contig53009_88
2	19.692	contig610444_11
2	19.692	contig39865_96
2	19.692	contig96070_28
2	19.942	contig39865_119
2	19.942	contig618527_101
2	19.942	contig37072_174
2	19.942	contig37072_96
2	19.942	contig37072_6
2	19.942	contig39865_114
2	19.942	contig37072_86
2	19.942	contig96070_49
2	19.942	contig69636_17
2	20.193	contig56016_100
2	20.193	contig59198_121
2	20.193	contig56016_150
2	20.193	contig69636_13
2	20.444	contig59198_106
2	20.444	contig35598_7
2	20.444	contig53009_100
2	20.444	contig53009_203
2	20.444	contig757018_11
2	20.444	contig618527_103
2	20.444	contig59198_115
2	20.444	contig59198_126
2	20.946	contig53009_29
2	20.946	contig53009_83
2	20.946	contig618527_72
2	20.946	contig618527_123
2	20.946	contig53009_198
2	21.702	contig485643_81
2	21.702	contig40453_168
2	21.702	contig40453_41
2	21.702	contig485643_61
2	21.952	contig665944_92
2	21.952	contig40453_145
2	22.203	contig63905_124
2	22.203	contig485643_60
2	22.454	contig63905_259
2	22.454	contig63905_51
2	22.454	contig63905_299
2	25.282	contig28989_121
2	25.282	contig425764_139
2	25.282	contig425764_138
2	26.548	contig7341_84
2	26.548	contig62370_116
2	26.548	contig599924_88
2	26.548	contig8293_68
2	26.548	contig59954_166
2	26.548	contig59954_112
2	26.548	contig8293_242
2	26.548	contig8293_156
2	26.548	contig62370_145
2	26.548	contig62370_216
2	26.548	contig599924_85
2	26.548	contig649044_85
2	26.548	contig62370_117
2	26.548	contig62370_3
2	27.051	contig60908_117
2	27.051	contig7341_17
2	27.051	contig700859_85
2	27.051	contig60908_90
2	27.051	contig7341_14
2	27.051	contig60908_93
2	27.051	contig7341_175
2	27.051	contig7341_122
2	27.051	contig7341_9
2	27.051	contig60908_21
2	27.301	contig8293_63
2	27.301	contig8293_125
2	27.301	contig59954_128
2	27.301	contig8293_194
2	27.301	contig59954_154
2	27.301	contig8293_44
2	27.301	contig8293_137
2	27.301	contig634491_123
2	29.342	contig56726_46
2	29.342	contig837643_47
2	29.342	contig28989_146
2	29.342	contig837643_150
2	29.342	contig39914_26
2	29.342	contig837643_146
2	29.342	contig837643_22
2	29.342	contig28989_39
2	29.342	contig837643_134
2	29.342	contig837643_130
2	29.342	contig837643_155
2	29.342	contig837643_177
2	31.124	contig56726_56
2	31.124	contig39914_107
2	31.124	contig737286_90
2	31.124	contig39914_75
2	31.374	contig627851_95
2	31.374	contig40276_152
2	31.374	contig40276_119
2	31.374	contig388122_52
2	31.374	contig39914_22
2	31.374	contig737286_62
2	31.374	contig73187_17
2	31.374	contig39914_86
2	31.374	contig10493_37
2	31.374	contig627851_140
2	31.374	contig582418_78
2	31.374	contig582418_49
2	31.877	contig88920_203
2	31.877	contig10892_90
2	31.877	contig68016_204
2	31.877	contig737286_72
2	31.877	contig40276_193
2	31.877	contig288878_138
2	31.877	contig737286_71
2	31.877	contig20880_278
2	31.877	contig40276_154
2	31.877	contig288878_204
2	31.877	contig10010_145
2	31.877	contig20880_206
2	31.877	contig68016_205
2	31.877	contig68016_186
2	31.877	contig288878_139
2	31.877	contig20880_141
2	31.877	contig68016_202
2	32.127	contig40276_71
2	32.127	contig10010_57
2	32.127	contig20880_269
2	32.127	contig48103_158
2	32.127	contig20880_260
2	32.127	contig20880_165
2	32.127	contig73187_253
2	32.127	contig88920_128
2	32.127	contig48103_159
2	32.127	contig48103_74
2	32.127	contig48103_93
2	32.63	contig10010_9
2	32.63	contig20880_166
2	33.132	contig49968_155
2	33.132	contig53940_228
2	33.132	contig46796_203
2	33.132	contig717829_41
2	33.132	contig36515_191
2	33.132	contig25879_249
2	33.132	contig46796_167
2	33.132	contig46796_68
2	33.132	contig597406_67
2	33.132	contig88390_231
2	33.132	contig25879_54
2	33.132	contig25879_105
2	33.132	contig46796_70
2	33.132	contig46796_262
2	33.132	contig46796_5
2	33.132	contig25879_46
2	33.132	contig46796_208
2	33.383	contig36014_63
2	33.383	contig36515_231
2	33.383	contig36515_184
2	33.634	contig717829_191
2	33.634	contig36515_114
2	33.634	contig888487_44
2	33.634	contig49968_214
2	33.634	contig29543_25
2	33.634	contig717829_174
2	33.634	contig36515_236
2	33.884	contig88390_73
2	33.884	contig29543_186
2	33.884	contig29543_232
2	33.884	contig434634_128
2	33.884	contig29543_103
2	34.135	contig67576_47
2	34.386	contig88390_152
2	34.386	contig21849_29
2	34.888	contig722414_32
2	34.888	contig658368_107
2	34.888	contig12107_32
2	34.888	contig722414_180
2	34.888	contig722414_61
2	34.888	contig658368_100
2	35.644	contig658368_75
2	35.644	contig12107_105
2	35.644	contig34408_115
2	35.644	contig12107_100
2	35.644	contig12107_58
2	35.894	contig50322_73
2	35.894	contig12107_118
2	35.894	contig53510_89
2	36.145	contig50322_92
2	36.145	contig50322_184
2	36.145	contig36932_271
2	36.145	contig50322_114
2	36.145	contig50322_209
2	36.145	contig50322_17
2	36.145	contig53510_155
2	36.145	contig50322_166
2	36.145	contig50322_190
2	36.145	contig50322_149
2	36.145	contig50322_206
2	36.145	contig50322_224
2	36.145	contig50322_157
2	36.145	contig50322_219
2	36.145	contig50322_232
2	36.145	contig50322_65
2	36.145	contig50322_233
2	36.145	contig50322_30
2	36.396	contig765672_180
2	36.396	contig36932_281
2	36.396	contig765672_127
2	36.396	contig36932_203
2	36.396	contig36932_125
2	36.396	contig36932_197
2	36.396	contig36932_119
2	36.396	contig36932_69
2	36.396	contig765672_23
2	36.396	contig36932_98
2	36.396	contig765672_185
[truncated: 27,759 more rows]
