# Supplementary material for: Construction of a high-density linkage map and detection of sex-specific markers in Penaeus japonicus
Source: PeerJ. 2021 Oct 29;9:e12390. doi: 10.7717/peerj.12390 (PMC8559604; doi:10.7717/peerj.12390)
Supplement: Supplemental Information 4 [file peerj-09-12390-s004.xlsx]

## Sheet: LG.fm.out
Table S4. Maternal and paternal linkage map of Penaeus japonicus.
Marker_id	Group	male_position	female_position
contig22171_30	1	0	0
contig22171_34	1	0	0
contig14998_74	1	0.503	0.503
contig22171_35	1	0.503	0
contig29802_16	1	1.005	0.503
contig3107_78	1	2.015	0.503
contig3107_242	1	2.015	0.503
contig46807_14	1	2.015	1.513
contig46807_67	1	2.015	1.513
contig46807_118	1	2.015	1.513
contig22171_58	1	3.025	1.513
contig23315_135	1	3.025	1.513
contig29802_99	1	3.025	1.513
contig29802_122	1	3.025	1.513
contig55055_3	1	3.025	1.513
contig55055_98	1	3.025	1.513
contig22171_115	1	3.528	1.513
contig22171_178	1	3.528	1.513
contig22171_211	1	3.528	1.513
contig29802_80	1	3.528	1.513
contig42978_208	1	3.528	1.513
contig42978_226	1	3.528	1.513
contig51335_129	1	3.528	1.513
contig287415_88	1	3.528	1.513
contig287415_94	1	3.528	1.513
contig287415_100	1	3.528	1.513
contig287415_116	1	3.528	1.513
contig29079_186	1	4.03	1.513
contig51335_68	1	4.03	1.513
contig53935_68	1	4.03	1.513
contig57708_108	1	4.03	2.015
contig57708_163	1	4.03	2.015
contig287415_13	1	4.03	1.513
contig671996_66	1	4.03	2.015
contig671996_86	1	4.03	2.015
contig827797_134	1	4.03	2.015
contig1695_17	1	4.533	2.015
contig1695_92	1	4.533	2.015
contig13101_36	1	4.533	2.015
contig13101_65	1	4.533	2.015
contig13101_126	1	4.533	2.015
contig28409_25	1	4.533	2.015
contig29079_16	1	4.533	2.015
contig29079_29	1	4.533	2.015
contig29079_71	1	4.533	2.015
contig29079_144	1	4.533	2.015
contig29079_195	1	4.533	2.015
contig29079_216	1	4.533	2.015
contig8389_62	1	5.035	4.03
contig9785_196	1	5.035	3.528
contig9785_200	1	5.035	3.528
contig9785_236	1	5.035	3.528
contig9785_237	1	5.035	3.528
contig19277_40	1	5.035	2.015
contig19277_66	1	5.035	2.518
contig53915_40	1	5.035	2.518
contig53915_100	1	5.035	2.518
contig53915_233	1	5.035	2.518
contig54278_54	1	5.035	2.518
contig72139_4	1	5.035	3.528
contig72139_18	1	5.035	2.015
contig72139_31	1	5.035	4.03
contig282489_23	1	5.035	2.518
contig282489_33	1	5.035	2.015
contig287102_100	1	5.035	2.015
contig599016_54	1	5.035	2.518
contig599016_125	1	5.035	2.518
contig9337_93	1	6.046	6.574
contig60386_4	1	6.046	4.533
contig60386_86	1	6.046	4.533
contig397517_20	1	6.046	4.03
contig429527_14	1	6.046	4.533
contig710332_33	1	7.056	9.625
contig710332_108	1	7.056	7.584
contig710332_125	1	7.056	7.584
contig31388_34	1	8.066	9.625
contig31388_61	1	8.066	9.625
contig31388_82	1	8.066	9.625
contig31388_96	1	8.066	9.625
contig31388_109	1	8.066	9.625
contig31388_112	1	8.066	9.625
contig31388_171	1	8.066	9.625
contig31388_184	1	8.066	9.625
contig31388_195	1	8.066	9.625
contig31388_207	1	8.066	9.625
contig31388_213	1	8.066	9.625
contig31388_214	1	8.066	9.625
contig31388_215	1	8.066	9.625
contig31388_231	1	8.066	9.625
contig23166_7	1	9.076	12.719
contig230345_7	1	9.076	12.719
contig230345_159	1	9.076	12.719
contig230345_172	1	9.076	12.719
contig1281_16	1	10.086	16.888
contig368540_87	1	10.589	18.929
contig368540_133	1	10.589	18.929
contig643302_42	1	10.589	19.939
contig643302_132	1	10.589	19.939
contig626613_42	1	11.091	19.939
contig970314_50	1	11.091	19.939
contig23471_135	1	12.101	19.939
contig54317_38	1	12.101	19.939
contig54317_189	1	12.101	19.939
contig384135_36	1	12.101	19.939
contig529693_95	1	13.111	19.939
contig529693_107	1	13.111	19.939
contig529693_118	1	13.111	19.939
contig609991_89	1	13.111	19.939
contig384135_143	1	13.614	19.939
contig453387_73	1	13.614	19.939
contig529693_146	1	13.614	19.939
contig704380_53	1	13.614	19.939
contig4155_66	1	16.179	19.939
contig4155_69	1	16.179	20.442
contig23471_35	1	16.179	19.939
contig23471_56	1	16.179	19.939
contig23471_58	1	16.179	19.939
contig23471_151	1	16.179	19.939
contig80144_85	1	16.179	19.939
contig384135_146	1	16.179	19.939
contig466098_50	1	16.179	20.442
contig466098_59	1	16.179	19.939
contig466098_70	1	16.179	20.442
contig704380_44	1	16.179	20.442
contig26833_91	1	17.189	20.442
contig41108_20	1	17.189	20.442
contig41756_44	1	17.189	20.944
contig41756_86	1	17.189	20.442
contig41756_91	1	17.189	20.442
contig453387_43	1	17.189	20.442
contig4155_23	1	19.23	21.447
contig4610_16	1	19.23	25.524
contig4610_184	1	19.23	25.524
contig4610_196	1	19.23	21.447
contig4610_219	1	19.23	20.944
contig13630_158	1	19.23	26.534
contig21970_88	1	19.23	25.524
contig21970_126	1	19.23	25.524
contig21970_156	1	19.23	25.524
contig26833_68	1	19.23	25.022
contig26833_100	1	19.23	25.022
contig32268_28	1	19.23	21.447
contig32268_83	1	19.23	25.524
contig32268_159	1	19.23	21.447
contig32268_183	1	19.23	25.524
contig41108_18	1	19.23	25.022
contig41108_19	1	19.23	25.022
contig41108_127	1	19.23	25.022
contig41108_147	1	19.23	25.022
contig41756_67	1	19.23	25.022
contig41756_189	1	19.23	25.022
contig45407_15	1	19.23	24.011
contig45407_41	1	19.23	24.011
contig45407_102	1	19.23	24.011
contig57492_67	1	19.23	25.022
contig64089_113	1	19.23	20.944
contig487869_66	1	19.23	25.524
contig623372_66	1	19.23	24.011
contig623372_83	1	19.23	24.011
contig678252_9	1	19.23	25.524
contig697481_89	1	19.23	20.944
contig697481_145	1	19.23	24.011
contig5028_3	1	19.732	30.703
contig5028_44	1	19.732	26.534
contig5028_128	1	19.732	30.703
contig13630_116	1	19.732	26.534
contig654403_135	1	20.235	30.703
contig697418_111	1	20.235	30.703
contig729022_32	1	20.235	30.703
contig59048_115	1	20.737	30.703
contig6270_97	1	21.24	30.703
contig14309_33	1	21.24	32.216
contig14309_36	1	21.24	30.703
contig14309_44	1	21.24	30.703
contig14309_66	1	21.24	32.216
contig14309_76	1	21.24	32.216
contig14309_78	1	21.24	32.216
contig15982_158	1	21.24	32.216
contig28211_21	1	21.24	32.216
contig41815_71	1	21.24	32.216
contig42404_47	1	21.24	30.703
contig42404_50	1	21.24	32.216
contig47230_143	1	21.24	30.703
contig47970_22	1	21.24	32.216
contig48814_12	1	21.24	32.216
contig48814_17	1	21.24	32.216
contig48814_171	1	21.24	32.216
contig48814_237	1	21.24	32.216
contig59048_113	1	21.24	30.703
contig84851_186	1	21.24	31.206
contig103255_42	1	21.24	32.216
contig103255_59	1	21.24	32.216
contig103255_114	1	21.24	32.216
contig103255_115	1	21.24	32.216
contig103255_116	1	21.24	32.216
contig343094_64	1	21.24	32.216
contig440520_47	1	21.24	31.206
contig440520_224	1	21.24	30.703
contig440520_238	1	21.24	32.216
contig669223_23	1	21.24	30.703
contig783034_93	1	21.24	30.703
contig813406_48	1	21.24	32.216
contig813406_156	1	21.24	32.216
contig829947_44	1	21.24	30.703
contig4092_102	1	23.805	33.221
contig4092_133	1	23.805	33.221
contig4092_187	1	23.805	32.719
contig4478_30	1	23.805	33.221
contig4478_46	1	23.805	33.221
contig8513_3	1	23.805	33.221
contig8513_38	1	23.805	33.221
contig8513_46	1	23.805	33.221
contig8513_102	1	23.805	33.221
contig8513_103	1	23.805	33.221
contig16814_120	1	23.805	33.221
contig16814_153	1	23.805	33.221
contig16814_155	1	23.805	33.221
contig16814_156	1	23.805	33.221
contig20092_87	1	23.805	33.221
contig20153_86	1	23.805	33.221
contig29426_109	1	23.805	33.221
contig29426_110	1	23.805	33.221
contig29455_59	1	23.805	33.221
contig42244_70	1	23.805	33.221
contig42244_74	1	23.805	32.216
contig42244_80	1	23.805	33.221
contig42244_130	1	23.805	33.221
contig44478_128	1	23.805	33.221
contig44478_146	1	23.805	33.221
contig44478_178	1	23.805	33.221
contig44478_201	1	23.805	33.221
contig44478_205	1	23.805	33.221
contig48357_11	1	23.805	32.216
contig48357_47	1	23.805	33.221
contig48357_61	1	23.805	33.221
contig48357_96	1	23.805	33.221
contig51986_68	1	23.805	33.221
contig54577_92	1	23.805	33.221
contig54577_265	1	23.805	33.221
contig55422_51	1	23.805	33.221
contig55422_145	1	23.805	33.221
contig55422_279	1	23.805	33.221
contig103255_13	1	23.805	32.216
contig255239_79	1	23.805	33.221
contig255239_119	1	23.805	33.221
contig255239_147	1	23.805	33.221
contig343860_2	1	23.805	33.221
contig343860_142	1	23.805	33.221
contig440520_78	1	23.805	32.216
contig453466_80	1	23.805	33.221
contig627240_50	1	23.805	32.216
contig627240_69	1	23.805	33.221
contig627240_225	1	23.805	33.221
contig627240_226	1	23.805	33.221
contig750306_51	1	23.805	32.216
contig781823_105	1	23.805	33.221
contig819481_66	1	23.805	32.719
contig819481_114	1	23.805	33.221
contig819481_117	1	23.805	33.221
contig1769_23	1	24.815	35.749
contig1896_133	1	24.815	35.247
contig6095_15	1	24.815	35.749
contig14487_201	1	24.815	35.749
contig16814_171	1	24.815	33.724
contig26038_91	1	24.815	35.749
contig32481_27	1	24.815	35.749
contig32481_50	1	24.815	35.749
contig55125_13	1	24.815	35.749
contig55125_43	1	24.815	35.749
contig55125_61	1	24.815	33.724
contig66929_9	1	24.815	35.749
contig68599_130	1	24.815	35.749
contig483849_108	1	24.815	35.749
contig483849_156	1	24.815	35.247
contig490759_40	1	24.815	35.749
contig490759_203	1	24.815	35.749
contig522648_113	1	24.815	35.749
contig534862_42	1	24.815	35.749
contig591655_16	1	24.815	35.749
contig591807_100	1	24.815	35.749
contig716552_18	1	24.815	35.749
contig716552_68	1	24.815	35.749
contig716552_115	1	24.815	35.749
contig782526_122	1	24.815	36.252
contig782526_168	1	24.815	36.252
contig782526_184	1	24.815	35.749
contig799906_74	1	24.815	35.749
contig799906_160	1	24.815	35.749
contig818809_178	1	24.815	35.749
contig890164_170	1	24.815	35.749
contig8420_8	1	25.317	37.257
contig32481_263	1	25.317	36.754
contig32481_264	1	25.317	36.754
contig47875_85	1	25.317	36.252
contig87581_152	1	25.317	37.257
contig87581_172	1	25.317	37.257
contig438752_22	1	25.317	36.754
contig493463_71	1	25.317	36.754
contig493463_101	1	25.317	37.759
contig8420_5	1	26.84	39.8
contig18989_63	1	26.84	37.759
contig33035_201	1	26.84	39.8
contig33035_202	1	26.84	39.8
contig579223_59	1	26.84	37.759
contig618362_80	1	26.84	37.759
contig836231_60	1	26.84	37.759
contig3783_115	1	28.363	41.313
contig10219_145	1	28.363	39.8
contig18150_158	1	28.363	39.8
contig25429_105	1	28.363	41.313
contig33035_171	1	28.363	39.8
contig33035_200	1	28.363	39.8
contig33035_206	1	28.363	40.303
contig33035_207	1	28.363	39.8
contig81441_63	1	28.363	41.313
contig526481_27	1	28.363	39.8
contig581208_121	1	28.363	41.313
contig581208_156	1	28.363	41.313
contig653177_41	1	28.363	41.313
contig835523_24	1	28.363	39.8
contig9856_148	1	28.866	41.313
contig25429_19	1	28.866	41.313
contig25429_244	1	28.866	41.313
contig653177_86	1	28.866	41.313
contig819049_3	1	34.692	41.313
contig10219_236	1	35.195	41.313
contig18150_150	1	35.195	41.313
contig33035_178	1	35.195	41.313
contig534621_6	1	35.195	41.313
contig618362_106	1	35.195	41.313
contig835523_65	1	35.195	41.313
contig3783_106	1	35.697	41.313
contig3783_139	1	35.697	41.313
contig3783_140	1	35.697	41.313
contig25429_253	1	36.2	41.313
contig30844_202	1	37.723	42.826
contig453451_28	1	37.723	41.815
contig17853_46	1	38.733	43.328
contig17853_64	1	38.733	42.826
contig28137_38	1	38.733	43.328
contig28137_71	1	38.733	42.826
contig28137_140	1	38.733	42.826
contig49718_5	1	38.733	42.826
contig49718_75	1	38.733	42.826
contig50079_31	1	38.733	43.328
contig651848_122	1	38.733	43.328
contig651848_138	1	38.733	43.328
contig8038_121	1	39.235	43.831
contig22113_62	1	39.235	43.328
contig9560_67	1	40.246	46.395
contig11954_51	1	40.246	46.395
contig11954_73	1	40.246	46.395
contig11954_133	1	40.246	46.395
contig12399_4	1	40.246	46.898
contig16573_152	1	40.246	46.898
contig16573_181	1	40.246	46.898
contig18310_39	1	40.246	46.395
contig19337_26	1	40.246	46.898
contig19532_74	1	40.246	46.395
contig19532_101	1	40.246	46.395
contig19532_150	1	40.246	46.395
contig20960_63	1	40.246	46.395
contig20960_197	1	40.246	46.395
contig28115_101	1	40.246	46.395
contig28115_211	1	40.246	46.898
contig34359_188	1	40.246	46.395
contig34359_232	1	40.246	46.898
contig44313_24	1	40.246	46.395
contig44313_87	1	40.246	46.395
contig44313_88	1	40.246	46.395
contig44313_129	1	40.246	46.395
contig434099_36	1	40.246	43.831
contig434099_62	1	40.246	43.831
contig515036_60	1	40.246	46.395
contig515036_129	1	40.246	46.395
contig541048_3	1	40.246	46.395
contig541048_9	1	40.246	46.395
contig541048_109	1	40.246	46.395
contig550508_6	1	40.246	46.395
contig550508_87	1	40.246	46.395
contig569779_24	1	40.246	46.395
contig569779_121	1	40.246	46.395
contig570759_99	1	40.246	46.395
contig570759_126	1	40.246	46.395
contig570759_127	1	40.246	46.395
contig727359_90	1	40.246	46.898
contig841128_58	1	40.246	43.831
contig978600_37	1	40.246	46.898
contig2736_135	1	41.256	49.928
contig2736_155	1	41.256	49.928
contig2736_182	1	41.256	49.928
contig7385_111	1	41.256	49.928
contig7385_115	1	41.256	49.928
contig7385_162	1	41.256	49.928
contig7385_165	1	41.256	49.928
contig16499_110	1	41.256	49.928
contig16499_145	1	41.256	49.928
contig16499_165	1	41.256	49.928
contig16499_166	1	41.256	49.928
contig16499_167	1	41.256	49.928
contig16499_229	1	41.256	49.928
contig16499_233	1	41.256	49.928
contig16573_176	1	41.256	46.898
contig18384_130	1	41.256	49.928
contig18384_137	1	41.256	49.928
contig28416_69	1	41.256	49.928
contig28416_118	1	41.256	49.928
contig32240_208	1	41.256	49.928
contig33231_158	1	41.256	47.4
contig38261_176	1	41.256	49.928
contig38261_223	1	41.256	49.928
contig40513_131	1	41.256	49.928
contig40801_161	1	41.256	49.928
contig49019_56	1	41.256	49.928
contig49019_115	1	41.256	49.928
contig53127_207	1	41.256	49.928
contig81574_45	1	41.256	49.928
contig81574_115	1	41.256	47.903
contig149020_17	1	41.256	49.928
contig149020_40	1	41.256	49.928
contig238402_182	1	41.256	49.928
contig427667_110	1	41.256	49.426
contig436983_51	1	41.256	49.928
contig500313_144	1	41.256	49.928
contig500313_149	1	41.256	49.928
contig569779_149	1	41.256	46.898
contig595069_10	1	41.256	49.928
contig595069_85	1	41.256	47.4
contig595069_102	1	41.256	47.4
contig607724_8	1	41.256	49.928
contig607724_21	1	41.256	49.928
contig607724_43	1	41.256	49.928
contig607724_127	1	41.256	49.928
contig607724_135	1	41.256	49.928
contig621595_91	1	41.256	49.928
contig671208_92	1	41.256	47.903
contig714057_23	1	41.256	49.928
contig714057_87	1	41.256	49.928
contig714057_88	1	41.256	49.928
contig830119_25	1	41.256	49.928
contig469_27	1	41.758	49.928
contig2346_51	1	41.758	49.928
contig2736_30	1	41.758	49.928
contig2736_40	1	41.758	49.928
contig2736_70	1	41.758	49.928
contig2736_88	1	41.758	49.928
contig2736_148	1	41.758	49.928
contig6827_166	1	41.758	49.928
contig6827_174	1	41.758	49.928
contig28416_57	1	41.758	49.928
contig28416_93	1	41.758	49.928
contig31823_15	1	41.758	49.928
contig32240_74	1	41.758	49.928
contig32240_93	1	41.758	49.928
contig32240_101	1	41.758	49.928
contig32240_102	1	41.758	49.928
contig32240_204	1	41.758	49.928
contig38261_253	1	41.758	49.928
contig53127_179	1	41.758	49.928
contig621595_95	1	41.758	49.928
contig16499_44	1	42.768	51.441
contig16499_116	1	42.768	51.441
contig16499_146	1	42.768	51.441
contig16499_161	1	42.768	51.441
contig16499_163	1	42.768	51.441
contig18384_11	1	42.768	49.928
contig18384_28	1	42.768	51.441
contig18384_54	1	42.768	49.928
contig37186_192	1	42.768	50.938
contig40801_113	1	42.768	51.441
contig63549_73	1	42.768	51.441
contig311215_185	1	42.768	51.441
contig376779_135	1	42.768	50.938
contig680553_106	1	42.768	51.441
contig7077_152	1	44.809	51.441
contig9749_14	1	44.809	51.943
contig9749_15	1	44.809	51.441
contig9749_93	1	44.809	51.943
contig9868_169	1	44.809	51.441
contig16946_37	1	44.809	51.441
contig16946_59	1	44.809	51.441
contig16946_116	1	44.809	51.441
contig16946_161	1	44.809	51.441
contig16946_173	1	44.809	51.441
contig16946_179	1	44.809	51.441
contig16946_233	1	44.809	51.441
contig24378_81	1	44.809	51.441
contig24378_158	1	44.809	51.441
contig24378_234	1	44.809	51.441
contig24601_114	1	44.809	51.943
contig24601_228	1	44.809	51.943
contig24601_268	1	44.809	51.441
contig28636_75	1	44.809	51.441
contig28636_94	1	44.809	51.943
contig28636_99	1	44.809	51.441
contig28636_101	1	44.809	51.441
contig28636_138	1	44.809	51.943
contig28636_151	1	44.809	51.441
contig28636_164	1	44.809	51.441
contig28928_3	1	44.809	51.441
contig28928_77	1	44.809	51.441
contig28928_118	1	44.809	51.441
contig28928_139	1	44.809	51.441
contig28928_150	1	44.809	51.943
contig28928_256	1	44.809	51.441
contig30242_10	1	44.809	51.441
contig32239_94	1	44.809	51.441
contig32239_106	1	44.809	51.441
contig32239_135	1	44.809	51.441
contig32239_206	1	44.809	51.441
contig36172_9	1	44.809	51.943
contig37053_164	1	44.809	51.441
contig37053_196	1	44.809	51.441
contig37053_197	1	44.809	51.441
contig37053_224	1	44.809	51.441
contig38319_274	1	44.809	51.943
contig40207_16	1	44.809	51.441
contig40207_17	1	44.809	51.441
contig40207_91	1	44.809	51.441
contig40207_270	1	44.809	51.441
contig40356_226	1	44.809	51.943
contig48690_43	1	44.809	51.943
contig48690_85	1	44.809	51.943
contig49084_89	1	44.809	51.441
contig49084_109	1	44.809	51.943
contig49084_119	1	44.809	51.441
contig49084_169	1	44.809	51.441
contig49084_199	1	44.809	51.441
contig64197_47	1	44.809	51.441
contig64197_84	1	44.809	51.441
contig64197_132	1	44.809	51.441
contig64197_177	1	44.809	51.441
contig64197_227	1	44.809	51.441
contig69269_198	1	44.809	51.441
contig247250_30	1	44.809	51.441
contig428703_69	1	44.809	51.441
contig428703_77	1	44.809	51.441
contig430163_128	1	44.809	51.441
contig430163_146	1	44.809	51.441
contig447263_10	1	44.809	51.441
contig447263_33	1	44.809	51.943
contig494491_83	1	44.809	51.943
contig494491_110	1	44.809	51.943
contig495891_31	1	44.809	51.441
contig495891_133	1	44.809	51.441
contig495891_180	1	44.809	51.441
contig521701_34	1	44.809	51.441
contig635280_74	1	44.809	51.441
contig635280_196	1	44.809	51.441
contig635280_232	1	44.809	51.441
contig645987_10	1	44.809	51.441
contig667406_131	1	44.809	51.441
contig687360_117	1	44.809	51.441
contig687360_123	1	44.809	51.441
contig697348_56	1	44.809	51.943
contig697348_85	1	44.809	51.441
contig811505_52	1	44.809	51.441
contig930035_127	1	44.809	51.441
contig930035_159	1	44.809	51.441
contig930035_168	1	44.809	51.441
contig7344_26	1	45.312	51.943
contig24601_116	1	45.312	51.943
contig26532_9	1	45.312	51.943
contig29567_156	1	45.312	51.943
contig43231_62	1	45.312	51.943
contig43231_84	1	45.312	51.943
contig43231_179	1	45.312	51.943
contig46939_196	1	45.312	51.943
contig252292_39	1	45.312	51.943
contig409218_81	1	45.312	51.943
contig494491_65	1	45.312	51.943
contig500313_98	1	45.312	51.943
contig635280_84	1	45.312	51.943
contig645987_11	1	45.312	51.943
contig645987_40	1	45.312	51.943
contig687360_153	1	45.312	51.943
contig697348_36	1	45.312	51.943
contig795465_203	1	45.312	51.943
contig832184_138	1	45.312	51.943
contig16946_103	1	45.815	52.446
contig16946_259	1	45.815	52.446
contig29567_88	1	45.815	51.943
contig29567_108	1	45.815	51.943
contig29567_188	1	45.815	52.446
contig30242_66	1	45.815	52.446
contig30242_161	1	45.815	52.446
contig30242_174	1	45.815	52.446
contig30242_176	1	45.815	52.446
contig30242_179	1	45.815	51.943
contig40207_15	1	45.815	51.943
contig40207_240	1	45.815	52.446
contig51042_127	1	45.815	52.446
contig62153_77	1	45.815	52.446
contig62153_81	1	45.815	52.446
contig62153_124	1	45.815	52.446
contig62153_152	1	45.815	52.446
contig64197_7	1	45.815	51.943
contig64197_36	1	45.815	52.446
contig64197_146	1	45.815	52.446
contig64197_148	1	45.815	52.446
contig64197_198	1	45.815	52.446
contig552703_9	1	45.815	52.446
contig650817_95	1	45.815	52.446
contig650817_144	1	45.815	52.446
contig800160_31	1	45.815	52.446
contig822520_97	1	45.815	52.446
contig822520_166	1	45.815	51.943
contig4867_14	1	46.317	54.461
contig4867_60	1	46.317	52.948
contig4867_197	1	46.317	54.461
contig12891_14	1	46.317	53.959
contig12891_108	1	46.317	53.959
contig14548_7	1	46.317	52.948
contig14548_131	1	46.317	52.948
contig20366_35	1	46.317	52.948
contig21381_23	1	46.317	52.948
contig21381_63	1	46.317	52.948
contig21381_70	1	46.317	52.446
contig21381_71	1	46.317	52.948
contig21381_90	1	46.317	52.948
contig21381_127	1	46.317	52.948
contig21381_173	1	46.317	52.948
contig21381_177	1	46.317	52.948
contig21381_183	1	46.317	52.948
contig21381_203	1	46.317	52.948
contig24388_15	1	46.317	54.964
contig24388_73	1	46.317	54.964
contig24388_74	1	46.317	52.948
contig24388_92	1	46.317	52.948
contig24388_102	1	46.317	54.964
contig24388_113	1	46.317	54.964
contig24388_166	1	46.317	52.948
contig24388_175	1	46.317	52.948
contig24388_180	1	46.317	54.964
contig24388_183	1	46.317	54.964
contig31494_229	1	46.317	53.959
contig32494_5	1	46.317	52.948
contig32494_61	1	46.317	52.948
contig32494_125	1	46.317	52.948
contig32494_140	1	46.317	52.948
contig32494_174	1	46.317	52.948
contig32494_227	1	46.317	52.948
contig35184_35	1	46.317	54.964
contig37972_135	1	46.317	52.446
contig42093_100	1	46.317	52.948
contig47163_89	1	46.317	52.948
contig47163_95	1	46.317	52.948
contig47163_134	1	46.317	52.948
contig47610_34	1	46.317	54.461
contig47610_181	1	46.317	54.461
contig51042_158	1	46.317	52.446
contig51042_176	1	46.317	52.446
contig53238_106	1	46.317	52.446
contig53398_16	1	46.317	52.948
contig76722_5	1	46.317	54.461
contig76722_111	1	46.317	54.461
contig80747_71	1	46.317	52.948
contig93410_23	1	46.317	52.446
contig93410_47	1	46.317	54.964
contig93410_52	1	46.317	54.964
contig93410_115	1	46.317	54.964
contig93410_168	1	46.317	54.964
contig185682_5	1	46.317	52.948
contig185682_16	1	46.317	54.461
contig185682_54	1	46.317	54.461
contig185682_171	1	46.317	52.948
contig185682_174	1	46.317	54.461
contig470597_11	1	46.317	54.964
contig475448_70	1	46.317	55.466
contig478166_54	1	46.317	54.964
contig478166_77	1	46.317	54.964
contig478166_97	1	46.317	54.964
contig486851_41	1	46.317	52.948
contig538960_25	1	46.317	54.964
contig538960_85	1	46.317	52.948
contig538960_97	1	46.317	52.948
contig552703_46	1	46.317	52.446
contig650817_19	1	46.317	54.461
contig650817_44	1	46.317	54.461
contig650817_75	1	46.317	54.461
contig650817_152	1	46.317	54.964
contig674020_65	1	46.317	52.948
contig674020_122	1	46.317	52.948
contig680700_36	1	46.317	52.948
contig713410_67	1	46.317	52.948
contig713410_70	1	46.317	52.948
contig713410_95	1	46.317	52.948
contig713410_129	1	46.317	52.948
contig713410_153	1	46.317	52.948
contig715976_78	1	46.317	52.948
contig715976_86	1	46.317	52.948
contig715976_105	1	46.317	52.948
contig724467_131	1	46.317	52.948
contig724673_26	1	46.317	52.948
contig724673_68	1	46.317	52.948
contig724673_96	1	46.317	52.948
contig724673_170	1	46.317	52.948
contig729309_66	1	46.317	53.959
contig729309_72	1	46.317	52.948
contig28804_36	1	46.82	55.466
contig28804_82	1	46.82	55.466
contig54531_78	1	46.82	55.466
contig54531_87	1	46.82	55.969
contig54531_108	1	46.82	55.466
contig54531_141	1	46.82	55.969
contig54531_185	1	46.82	55.969
contig54531_242	1	46.82	55.466
contig54531_253	1	46.82	55.466
contig55714_84	1	46.82	55.969
contig475448_179	1	46.82	55.466
contig624746_14	1	46.82	55.969
contig14548_109	1	47.83	55.969
contig14548_113	1	47.83	55.969
contig25759_14	1	47.83	55.969
contig35864_14	1	47.83	55.969
contig54531_193	1	47.83	55.969
contig54531_232	1	47.83	55.969
contig55714_51	1	47.83	56.471
contig55714_90	1	47.83	55.969
contig55714_137	1	47.83	55.969
contig55714_153	1	47.83	55.969
contig55714_156	1	47.83	55.969
contig55714_173	1	47.83	55.969
contig55714_182	1	47.83	55.969
contig398333_57	1	47.83	55.969
contig398333_78	1	47.83	55.969
contig398333_111	1	47.83	55.969
contig398333_142	1	47.83	55.969
contig533857_134	1	47.83	55.969
contig545223_22	1	47.83	55.969
contig22477_140	1	48.84	56.471
contig22477_144	1	48.84	56.471
contig11031_155	1	50.363	56.471
contig11031_216	1	50.363	56.974
contig11031_218	1	50.363	56.974
contig11031_236	1	50.363	56.974
contig14927_70	1	50.363	57.979
contig14927_103	1	50.363	57.476
contig14927_205	1	50.363	57.979
contig14927_283	1	50.363	56.471
contig21440_52	1	50.363	56.974
contig21440_53	1	50.363	56.471
contig21440_98	1	50.363	56.974
contig40568_114	1	50.363	57.476
contig40568_120	1	50.363	57.476
contig51826_28	1	50.363	57.476
contig51826_81	1	50.363	57.476
contig51826_147	1	50.363	57.476
contig423427_7	1	50.363	56.471
contig423427_13	1	50.363	57.476
contig533857_175	1	50.363	56.974
contig533857_188	1	50.363	56.974
contig533857_189	1	50.363	56.974
contig545223_26	1	50.363	56.471
contig766776_106	1	50.363	56.974
contig766776_134	1	50.363	56.974
contig766776_138	1	50.363	56.974
contig834602_150	1	50.363	57.476
contig2785_190	1	50.865	57.979
contig14927_274	1	50.865	57.979
contig28319_82	1	50.865	59.502
contig28319_83	1	50.865	59.502
contig28319_96	1	50.865	59.502
contig33850_71	1	50.865	59.502
contig33850_82	1	50.865	59.502
contig33850_89	1	50.865	59.502
contig33850_138	1	50.865	57.979
contig51826_26	1	50.865	59.502
contig51826_174	1	50.865	59.502
contig68905_76	1	50.865	59.502
contig68905_163	1	50.865	59.502
contig68905_167	1	50.865	59.502
contig68905_175	1	50.865	59.502
contig68905_178	1	50.865	59.502
contig68905_188	1	50.865	59.502
contig68905_223	1	50.865	59.502
contig71349_103	1	50.865	59.502
contig71349_127	1	50.865	57.979
contig884999_12	1	50.865	57.979
contig884999_28	1	50.865	57.979
contig884999_56	1	50.865	57.979
contig3286_63	1	51.368	61.527
contig3286_220	1	51.368	61.527
contig3286_227	1	51.368	61.527
contig3286_234	1	51.368	61.527
contig3286_236	1	51.368	61.527
contig25165_216	1	51.368	59.502
contig28319_239	1	51.368	60.004
contig31606_186	1	51.368	61.527
contig33850_70	1	51.368	60.004
contig33850_145	1	51.368	60.004
contig33850_150	1	51.368	60.004
contig33850_178	1	51.368	60.004
contig38211_62	1	51.368	61.527
contig38211_94	1	51.368	60.004
contig38211_101	1	51.368	61.527
contig41284_135	1	51.368	61.527
contig41284_202	1	51.368	61.527
contig45545_222	1	51.368	61.527
contig45545_223	1	51.368	61.527
contig45545_227	1	51.368	61.527
contig45545_230	1	51.368	61.527
contig54884_124	1	51.368	61.527
contig59559_44	1	51.368	61.527
contig59559_57	1	51.368	61.527
contig59559_58	1	51.368	61.527
contig59559_72	1	51.368	61.527
contig71349_48	1	51.368	59.502
contig658660_14	1	51.368	61.527
contig658660_26	1	51.368	61.527
contig978544_61	1	51.368	61.527
contig41284_83	1	51.87	61.527
contig41284_143	1	51.87	61.527
contig41284_168	1	51.87	61.527
contig41284_176	1	51.87	61.527
contig45545_179	1	51.87	61.527
contig45545_180	1	51.87	61.527
contig45545_204	1	51.87	61.527
contig45545_210	1	51.87	61.527
contig45545_221	1	51.87	61.527
contig3286_122	1	52.88	62.537
contig3286_127	1	52.88	62.537
contig3286_141	1	52.88	62.537
contig3286_152	1	52.88	62.537
contig3286_202	1	52.88	62.537
contig3286_267	1	52.88	62.537
contig3286_194	1	54.403	64.06
contig41284_203	1	54.403	62.537
contig724673_171	1	64.326	84.836
contig724673_147	1	64.828	84.836
contig724673_162	1	64.828	84.836
contig724673_172	1	64.828	84.836
contig724673_182	1	64.828	84.836
contig40481_10	1	78.55	84.836
contig514019_111	1	94.286	104.119
contig17615_58	1	96.327	105.642
contig41830_76	1	96.327	105.642
contig41830_91	1	96.327	105.642
contig514019_30	1	96.327	105.642
contig514019_126	1	96.327	105.642
contig1108_112	1	99.955	105.642
contig80284_96	1	99.955	107.165
contig26848_96	1	100.458	108.688
contig26848_138	1	100.458	108.688
contig26848_149	1	100.458	108.688
contig26848_166	1	100.458	108.688
contig26848_167	1	100.458	108.688
contig80284_15	1	100.458	107.165
contig450641_76	1	100.458	108.688
contig450641_110	1	100.458	108.688
contig561612_17	1	100.458	108.688
contig7906_148	1	101.468	109.191
contig38463_76	1	101.468	109.191
contig40554_140	1	101.468	109.191
contig46862_39	1	101.468	109.191
contig46862_151	1	101.468	109.191
contig46862_158	1	101.468	109.191
contig66249_20	1	101.468	109.191
contig66249_107	1	101.468	109.191
contig25808_37	1	101.971	109.191
contig25808_265	1	101.971	109.191
contig38463_104	1	101.971	109.191
contig356885_87	1	101.971	109.191
contig25808_41	1	102.473	109.693
contig25808_175	1	102.473	109.191
contig25808_187	1	102.473	109.191
contig29396_75	1	102.473	109.191
contig29396_95	1	102.473	109.191
contig29396_159	1	102.473	109.191
contig40554_36	1	102.473	109.191
contig40554_135	1	102.473	109.191
contig40554_147	1	102.473	109.191
contig46862_42	1	102.473	109.191
contig46862_57	1	102.473	109.191
contig46862_174	1	102.473	109.191
contig66249_54	1	102.473	109.191
contig356885_82	1	102.473	109.191
contig404765_119	1	102.473	113.862
contig819321_62	1	102.473	114.365
contig47208_121	1	102.976	116.406
contig47208_145	1	102.976	116.406
contig47208_146	1	102.976	116.406
contig47208_149	1	102.976	116.406
contig47208_157	1	102.976	116.406
contig47208_176	1	102.976	116.406
contig47208_178	1	102.976	116.406
contig47208_196	1	102.976	116.406
contig47208_207	1	102.976	116.406
contig47208_221	1	102.976	116.406
contig47208_227	1	102.976	116.406
contig15608_77	1	103.986	117.416
contig15608_167	1	103.986	117.416
contig25808_119	1	103.986	117.416
contig25808_218	1	103.986	117.416
contig25808_223	1	103.986	117.416
contig46862_37	1	103.986	117.416
contig46862_40	1	103.986	117.416
contig46862_154	1	103.986	117.416
contig46862_203	1	103.986	117.416
contig47208_2	1	103.986	116.406
contig47208_189	1	103.986	116.406
contig47208_201	1	103.986	116.406
contig66249_66	1	103.986	117.416
contig66249_115	1	103.986	117.416
contig356885_29	1	103.986	117.416
contig356885_80	1	103.986	117.416
contig535543_70	1	103.986	117.416
contig535543_82	1	103.986	117.416
contig561612_102	1	103.986	117.416
contig819321_70	1	103.986	117.416
contig970105_23	1	103.986	117.416
contig970105_32	1	103.986	117.416
contig970105_43	1	103.986	116.406
contig819321_84	1	104.488	117.416
contig16726_122	1	106.011	117.416
contig30570_8	1	106.011	117.416
contig30570_11	1	106.011	117.416
contig30570_53	1	106.011	117.416
contig30570_119	1	106.011	117.416
contig30570_124	1	106.011	118.426
contig47208_105	1	106.011	118.426
contig47208_237	1	106.011	118.426
contig624313_118	1	106.011	118.426
contig49696_121	1	107.021	118.426
contig57968_152	1	107.021	118.426
contig57968_159	1	107.021	118.426
contig57968_161	1	107.021	118.426
contig623889_31	1	107.021	120.467
contig623889_71	1	107.021	120.97
contig623889_92	1	107.021	118.426
contig625697_61	1	107.021	118.426
contig625697_62	1	107.021	118.426
contig625697_85	1	107.021	118.426
contig625697_86	1	107.021	118.426
contig889690_202	1	107.021	120.97
contig889690_203	1	107.021	120.467
contig18437_109	1	108.032	123.513
contig49696_108	1	108.032	123.513
contig699342_36	1	108.032	121.472
contig278927_39	1	109.555	123.513
contig11078_222	1	110.057	125.539
contig18437_87	1	110.057	123.513
contig18437_119	1	110.057	123.513
contig18437_129	1	110.057	123.513
contig716842_23	1	110.057	124.016
contig716842_63	1	110.057	124.016
contig716842_94	1	110.057	124.016
contig11078_180	1	110.56	125.539
contig11826_113	1	110.56	126.549
contig278927_6	1	110.56	126.549
contig521309_107	1	110.56	125.539
contig521309_157	1	110.56	126.549
contig708267_73	1	110.56	126.549
contig785723_37	1	111.062	126.549
contig785723_39	1	111.062	126.549
contig785723_50	1	111.062	126.549
contig45787_17	1	111.565	126.549
contig45787_35	1	111.565	126.549
contig45787_61	1	111.565	126.549
contig45787_137	1	111.565	126.549
contig45787_142	1	111.565	126.549
contig45787_156	1	111.565	126.549
contig45787_187	1	111.565	126.549
contig45787_210	1	111.565	126.549
contig372676_131	1	111.565	126.549
contig487800_54	1	111.565	126.549
contig487800_82	1	111.565	126.549
contig487800_110	1	111.565	126.549
contig572755_31	1	111.565	126.549
contig606865_8	1	111.565	126.549
contig11826_92	1	112.575	126.549
contig11826_162	1	112.575	126.549
contig11826_218	1	112.575	126.549
contig11826_263	1	112.575	126.549
contig45787_65	1	112.575	126.549
contig69671_65	1	112.575	126.549
contig69671_251	1	112.575	126.549
contig372676_56	1	112.575	126.549
contig372676_95	1	112.575	126.549
contig372676_98	1	112.575	126.549
contig393806_87	1	112.575	126.549
contig487800_47	1	112.575	126.549
contig487800_81	1	112.575	126.549
contig708267_31	1	112.575	126.549
contig774368_78	1	112.575	126.549
contig774368_114	1	112.575	126.549
contig774368_184	1	112.575	126.549
contig785723_33	1	112.575	126.549
contig18865_54	1	114.098	127.559
contig18865_87	1	114.098	127.559
contig26089_163	1	114.098	127.559
contig26089_179	1	114.098	127.559
contig41783_268	1	114.098	128.062
contig42409_234	1	114.098	127.559
contig46972_54	1	114.098	127.559
contig46972_86	1	114.098	127.559
contig627356_47	1	114.098	128.062
contig672213_58	1	114.098	127.559
contig814328_10	1	114.098	127.559
contig22873_41	1	114.6	128.062
contig22873_66	1	114.6	128.062
contig22873_176	1	114.6	128.062
contig24900_39	1	114.6	128.062
contig35175_94	1	114.6	128.062
contig41783_6	1	114.6	128.062
contig42624_28	1	114.6	128.062
contig42624_50	1	114.6	128.062
contig44815_139	1	114.6	128.062
contig46536_26	1	114.6	128.062
contig46536_53	1	114.6	128.062
contig46536_74	1	114.6	128.062
contig51411_166	1	114.6	128.062
contig51411_171	1	114.6	128.062
contig51411_180	1	114.6	128.062
contig51411_238	1	114.6	128.062
contig55078_51	1	114.6	128.062
contig55078_62	1	114.6	128.062
contig55078_63	1	114.6	128.062
contig55078_105	1	114.6	128.062
contig55078_183	1	114.6	128.062
contig55156_136	1	114.6	128.062
contig55156_149	1	114.6	128.062
contig55156_154	1	114.6	128.062
contig58311_24	1	114.6	128.062
contig495158_30	1	114.6	128.062
contig581556_47	1	114.6	128.062
contig581556_65	1	114.6	128.062
contig1527_22	1	115.103	128.062
contig1527_118	1	115.103	128.062
contig1527_255	1	115.103	128.062
contig1527_268	1	115.103	128.062
contig7174_38	1	115.103	128.062
contig7174_93	1	115.103	128.062
contig7174_156	1	115.103	128.062
contig7174_167	1	115.103	128.062
contig7174_174	1	115.103	128.062
contig16107_89	1	115.103	128.062
contig22873_108	1	115.103	128.062
contig30205_25	1	115.103	128.062
contig42409_32	1	115.103	128.062
contig42409_65	1	115.103	128.062
contig42409_85	1	115.103	128.062
contig42409_94	1	115.103	128.062
contig42409_130	1	115.103	128.062
contig42409_190	1	115.103	128.062
contig42624_18	1	115.103	128.062
contig42624_36	1	115.103	128.062
contig46536_168	1	115.103	128.062
contig51411_76	1	115.103	128.062
contig54590_43	1	115.103	128.062
contig55078_61	1	115.103	128.062
contig55078_147	1	115.103	128.062
contig55078_151	1	115.103	128.062
contig55078_161	1	115.103	128.062
contig55078_168	1	115.103	128.062
contig55078_173	1	115.103	128.062
contig55156_17	1	115.103	128.062
contig55156_112	1	115.103	128.062
contig495158_73	1	115.103	128.062
contig581556_137	1	115.103	128.062
contig602139_39	1	115.103	128.062
contig699690_112	1	115.103	128.062
contig726248_70	1	115.103	128.062
contig726248_112	1	115.103	128.062
contig726248_179	1	115.103	128.062
contig729237_70	1	115.103	128.062
contig783106_102	1	115.103	128.062
contig5005_3	1	115.605	128.062
contig5005_52	1	115.605	128.062
contig5005_82	1	115.605	128.062
contig4439_198	1	116.615	128.062
contig11438_30	1	116.615	128.062
contig602139_51	1	116.615	128.062
contig602139_128	1	116.615	128.062
contig783106_116	1	116.615	128.062
contig783106_177	1	116.615	128.062
contig783106_189	1	116.615	128.062
contig113_44	1	117.118	128.062
contig15702_76	1	117.118	129.072
contig16107_203	1	117.118	128.062
contig27193_97	1	117.118	129.072
contig30205_28	1	117.118	129.072
contig30205_31	1	117.118	129.072
contig30205_237	1	117.118	128.062
contig45097_155	1	117.118	128.062
contig45097_167	1	117.118	128.062
contig45097_240	1	117.118	128.062
contig518468_19	1	117.118	129.072
contig602728_32	1	117.118	128.062
contig729514_73	1	117.118	129.072
contig4439_245	1	118.128	129.072
contig4439_128	1	119.138	129.072
contig33362_92	1	119.138	129.072
contig53771_113	1	119.138	129.072
contig53771_142	1	119.138	129.072
contig53771_153	1	119.138	129.072
contig53771_170	1	119.138	129.072
contig76932_42	1	119.138	129.072
contig386668_71	1	119.138	129.072
contig386668_116	1	119.138	129.072
contig502675_112	1	119.138	129.072
contig25293_89	1	120.148	129.574
contig33362_34	1	120.148	129.072
contig33362_107	1	120.148	129.574
contig33362_167	1	120.148	129.072
contig33362_183	1	120.148	129.574
contig545287_67	1	120.148	129.574
contig16749_83	1	120.651	129.574
contig16749_93	1	120.651	130.077
contig16749_144	1	120.651	130.077
contig33362_7	1	120.651	129.574
contig41989_76	1	120.651	129.574
contig41989_77	1	120.651	129.574
contig41989_132	1	120.651	133.128
contig86515_48	1	120.651	132.118
contig583544_29	1	120.651	133.128
contig730930_62	1	120.651	130.077
contig730930_95	1	120.651	130.077
contig800030_37	1	120.651	129.574
contig28935_115	1	121.153	133.128
contig15198_75	1	123.194	135.672
contig15198_87	1	123.194	135.672
contig15198_143	1	123.194	135.672
contig15198_159	1	123.194	135.672
contig31628_194	1	123.194	135.169
contig66689_162	1	123.194	135.672
contig415548_26	1	123.194	135.672
contig531123_46	1	123.194	135.672
contig531123_106	1	123.194	135.169
contig531123_135	1	123.194	135.672
contig531123_182	1	123.194	135.169
contig570560_34	1	123.194	135.672
contig570560_43	1	123.194	135.672
contig570560_94	1	123.194	135.672
contig578595_2	1	123.194	135.672
contig578595_15	1	123.194	135.169
contig578595_19	1	123.194	135.672
contig578595_129	1	123.194	135.169
contig583544_86	1	123.194	133.128
contig781828_129	1	123.194	135.672
contig800030_92	1	123.194	135.169
contig800030_137	1	123.194	135.169
contig964449_39	1	123.194	135.672
contig964449_43	1	123.194	135.672
contig964449_45	1	123.194	135.672
contig781828_41	1	123.697	135.672
contig3166_26	1	124.199	137.184
contig3166_128	1	124.199	137.184
contig28038_81	1	124.199	137.184
contig41089_218	1	124.199	137.184
contig41089_241	1	124.199	137.184
contig42809_53	1	124.199	137.184
contig42809_160	1	124.199	137.184
contig42809_204	1	124.199	137.184
contig51386_78	1	124.199	137.184
contig66689_181	1	124.199	137.184
contig66689_185	1	124.199	137.184
contig70326_99	1	124.199	137.184
contig76044_43	1	124.199	137.184
contig76044_81	1	124.199	137.184
contig76044_173	1	124.199	137.184
contig84792_92	1	124.199	137.184
contig84792_182	1	124.199	137.184
contig295020_8	1	124.199	137.184
contig372731_57	1	124.199	137.184
contig426585_43	1	124.199	136.174
contig426585_54	1	124.199	136.174
contig426585_57	1	124.199	136.174
contig426585_63	1	124.199	136.174
contig494054_46	1	124.199	137.184
contig781828_35	1	124.199	136.174
contig807242_126	1	124.199	137.184
contig3166_82	1	124.702	137.184
contig8546_54	1	124.702	137.184
contig8546_208	1	124.702	137.184
contig17319_38	1	124.702	137.184
contig17319_61	1	124.702	137.184
contig41089_6	1	124.702	137.184
contig41089_164	1	124.702	137.184
contig42809_211	1	124.702	137.184
contig42809_213	1	124.702	137.184
contig42809_215	1	124.702	137.184
contig42809_229	1	124.702	137.184
contig56874_47	1	124.702	137.184
contig56874_115	1	124.702	137.184
contig56874_144	1	124.702	137.184
contig56874_145	1	124.702	137.184
contig56874_167	1	124.702	137.184
contig76044_10	1	124.702	137.184
contig84792_164	1	124.702	137.184
contig401834_63	1	124.702	137.184
contig749256_88	1	124.702	137.184
contig2087_50	1	126.225	138.194
contig2087_76	1	126.225	138.194
contig2087_78	1	126.225	138.194
contig2087_79	1	126.225	138.194
contig2087_189	1	126.225	138.194
contig2087_207	1	126.225	138.194
contig2087_258	1	126.225	138.194
contig2087_275	1	126.225	138.194
contig21169_136	1	126.225	137.184
contig42626_3	1	126.225	138.194
contig42626_17	1	126.225	138.194
contig42626_54	1	126.225	138.194
contig42626_62	1	126.225	138.194
contig42626_82	1	126.225	138.194
contig42626_207	1	126.225	138.194
contig54597_48	1	126.225	138.194
contig54597_72	1	126.225	138.194
contig54597_84	1	126.225	138.194
contig54597_92	1	126.225	138.194
contig54597_110	1	126.225	138.194
contig54597_126	1	126.225	138.194
contig54597_143	1	126.225	138.194
contig54597_149	1	126.225	138.194
contig54597_161	1	126.225	138.194
contig54597_162	1	126.225	138.194
contig54597_170	1	126.225	138.194
contig70326_117	1	126.225	138.194
contig74052_51	1	126.225	138.194
contig94075_250	1	126.225	138.194
contig94075_253	1	126.225	138.194
contig779353_46	1	126.225	138.194
contig53479_21	1	126.727	138.697
contig53479_40	1	126.727	138.697
contig53479_65	1	126.727	138.697
contig53479_112	1	126.727	138.697
contig53479_168	1	126.727	138.697
contig70752_145	1	126.727	138.697
contig215_27	1	128.769	141.764
contig215_35	1	128.769	141.262
contig215_105	1	128.769	141.764
contig3800_129	1	128.769	138.697
contig8075_136	1	128.769	141.764
contig8075_143	1	128.769	141.262
contig8075_144	1	128.769	138.697
contig8075_203	1	128.769	138.697
contig8075_207	1	128.769	141.262
contig8075_212	1	128.769	138.697
contig8075_214	1	128.769	141.262
contig8075_215	1	128.769	138.697
contig8075_217	1	128.769	141.262
contig8075_220	1	128.769	141.262
contig8075_222	1	128.769	138.697
contig9607_26	1	128.769	141.764
contig10351_27	1	128.769	138.697
contig10351_72	1	128.769	141.262
contig10351_82	1	128.769	138.697
contig15532_168	1	128.769	141.764
contig25715_19	1	128.769	141.262
contig25892_28	1	128.769	141.262
contig25892_248	1	128.769	141.262
contig35942_33	1	128.769	141.764
contig35942_34	1	128.769	141.764
contig35942_115	1	128.769	141.764
contig36899_16	1	128.769	141.764
contig36899_100	1	128.769	141.764
contig41542_41	1	128.769	141.764
contig41542_58	1	128.769	141.764
contig41542_199	1	128.769	141.764
contig46376_218	1	128.769	141.764
contig49433_49	1	128.769	141.764
contig49433_135	1	128.769	141.764
contig49433_137	1	128.769	141.764
contig50207_45	1	128.769	141.764
contig50207_158	1	128.769	141.764
contig50207_181	1	128.769	141.764
contig50207_230	1	128.769	141.764
contig51854_103	1	128.769	138.697
contig53387_92	1	128.769	141.262
contig53387_122	1	128.769	141.764
contig53820_35	1	128.769	141.764
contig53820_67	1	128.769	141.764
contig53820_108	1	128.769	141.764
contig70752_9	1	128.769	138.697
contig70752_48	1	128.769	138.697
contig70752_99	1	128.769	138.697
contig224279_24	1	128.769	141.764
contig286430_78	1	128.769	141.262
contig501492_180	1	128.769	141.764
contig511045_96	1	128.769	141.764
contig511045_139	1	128.769	141.764
contig555417_9	1	128.769	138.697
contig555417_149	1	128.769	141.262
contig555417_150	1	128.769	141.262
contig577826_106	1	128.769	141.262
contig577826_143	1	128.769	141.262
contig596833_24	1	128.769	141.764
contig636477_56	1	128.769	141.262
contig636477_67	1	128.769	141.262
contig636477_79	1	128.769	141.262
contig699004_30	1	128.769	138.697
contig699004_66	1	128.769	141.764
contig699004_87	1	128.769	141.262
contig840657_164	1	128.769	141.764
contig840657_176	1	128.769	141.764
contig840657_183	1	128.769	141.764
contig840657_218	1	128.769	141.764
contig15532_138	1	129.271	141.764
contig15532_166	1	129.271	141.764
contig23073_32	1	129.271	141.764
contig41542_92	1	129.271	141.764
contig41542_124	1	129.271	141.764
contig59445_238	1	129.271	141.764
contig447852_106	1	129.271	141.764
contig447852_155	1	129.271	141.764
contig701481_66	1	129.271	141.764
contig35942_17	1	129.774	142.267
contig4550_23	1	130.276	142.267
contig13520_141	1	130.276	142.267
contig13520_149	1	130.276	142.267
contig13520_180	1	130.276	142.267
contig14787_139	1	130.276	142.267
contig14787_157	1	130.276	142.267
contig14787_176	1	130.276	142.267
contig17756_46	1	130.276	142.267
contig17756_124	1	130.276	142.267
contig17756_180	1	130.276	142.267
contig17756_187	1	130.276	142.267
contig17756_202	1	130.276	142.267
contig18085_98	1	130.276	142.267
contig20070_16	1	130.276	142.267
contig20070_30	1	130.276	142.267
contig22060_2	1	130.276	142.267
contig22060_59	1	130.276	142.267
contig22060_72	1	130.276	142.267
contig22060_92	1	130.276	142.267
contig35942_81	1	130.276	142.267
contig38710_66	1	130.276	142.267
contig38710_109	1	130.276	142.267
contig211828_80	1	130.276	142.267
contig470338_25	1	130.276	142.267
contig470338_136	1	130.276	142.267
contig470338_157	1	130.276	142.267
contig470338_169	1	130.276	142.267
contig470338_170	1	130.276	142.267
contig501492_195	1	130.276	142.267
contig563900_51	1	130.276	142.267
contig563900_66	1	130.276	142.267
contig563900_80	1	130.276	142.267
contig641679_88	1	130.276	142.267
contig641679_102	1	130.276	142.267
contig641679_111	1	130.276	142.267
contig641679_119	1	130.276	142.267
contig641679_142	1	130.276	142.267
contig840657_59	1	130.276	142.267
contig4064_129	1	131.286	142.267
contig4064_178	1	131.286	142.267
contig10923_4	1	131.286	142.267
contig10923_122	1	131.286	142.267
contig10923_186	1	131.286	142.267
contig10923_191	1	131.286	142.267
contig13520_166	1	131.286	142.267
contig17756_73	1	131.286	142.267
contig17756_175	1	131.286	142.267
contig17756_203	1	131.286	142.267
contig21634_53	1	131.286	142.267
contig21634_62	1	131.286	142.267
contig21634_152	1	131.286	142.267
contig32442_47	1	131.286	142.267
contig32442_51	1	131.286	142.267
contig32442_89	1	131.286	142.267
contig32442_96	1	131.286	142.267
contig37982_77	1	131.286	142.267
contig42237_132	1	131.286	142.267
contig42237_189	1	131.286	142.267
contig42237_209	1	131.286	142.267
contig43029_3	1	131.286	142.267
contig43029_39	1	131.286	142.267
contig43029_112	1	131.286	142.267
contig49293_4	1	131.286	142.267
contig49293_85	1	131.286	142.267
contig49293_216	1	131.286	142.267
contig49293_219	1	131.286	142.267
contig49293_233	1	131.286	142.267
contig79196_46	1	131.286	142.267
contig79196_57	1	131.286	142.267
contig79196_68	1	131.286	142.267
contig79196_148	1	131.286	142.267
contig79196_170	1	131.286	142.267
contig79196_185	1	131.286	142.267
contig79196_191	1	131.286	142.267
contig470338_106	1	131.286	142.267
contig470338_125	1	131.286	142.267
contig522050_86	1	131.286	142.267
contig522050_87	1	131.286	142.267
contig522764_130	1	131.286	142.267
contig522764_161	1	131.286	142.267
contig607605_48	1	131.286	142.267
contig607605_120	1	131.286	142.267
contig782027_87	1	131.286	142.267
contig823810_117	1	131.286	142.267
contig841515_85	1	131.286	142.267
contig841515_93	1	131.286	142.267
contig841515_95	1	131.286	142.267
contig10923_65	1	131.789	142.769
contig10923_172	1	131.789	142.769
contig10923_206	1	131.789	142.769
contig13520_64	1	131.789	142.267
contig17756_157	1	131.789	142.267
contig17756_179	1	131.789	142.267
contig20070_104	1	131.789	142.267
contig21634_169	1	131.789	142.769
contig43487_65	1	131.789	142.769
contig43487_68	1	131.789	142.769
contig43487_107	1	131.789	142.769
contig43487_177	1	131.789	142.769
contig43487_201	1	131.789	142.769
contig470338_92	1	131.789	142.267
contig470338_134	1	131.789	142.267
contig497442_10	1	131.789	142.769
contig4545_34	1	132.291	143.272
contig4545_58	1	132.291	143.272
contig4545_64	1	132.291	143.272
contig4545_96	1	132.291	143.272
contig11049_99	1	132.291	143.774
contig16466_24	1	132.291	143.272
contig19049_42	1	132.291	143.774
contig19049_65	1	132.291	143.774
contig19049_118	1	132.291	143.774
contig19049_224	1	132.291	143.774
contig19049_225	1	132.291	143.774
contig19049_248	1	132.291	143.272
contig19056_91	1	132.291	143.774
contig19056_238	1	132.291	143.272
contig30807_25	1	132.291	143.272
contig37982_17	1	132.291	143.272
contig49904_133	1	132.291	143.272
contig49904_172	1	132.291	142.769
contig55043_164	1	132.291	143.774
contig55043_240	1	132.291	143.774
contig55043_263	1	132.291	143.272
contig462760_59	1	132.291	143.774
contig462760_68	1	132.291	143.774
contig499528_7	1	132.291	143.272
contig499528_45	1	132.291	142.769
contig499528_53	1	132.291	143.272
contig611117_32	1	132.291	143.272
contig679975_56	1	132.291	142.769
contig692706_65	1	132.291	143.774
contig692706_142	1	132.291	143.272
contig740267_15	1	132.291	142.769
contig451_130	1	132.794	143.774
contig451_192	1	132.794	144.779
contig16466_45	1	132.794	144.277
contig16466_153	1	132.794	144.277
contig19049_50	1	132.794	143.774
contig29397_139	1	132.794	144.277
contig29397_140	1	132.794	144.277
contig35799_96	1	132.794	143.774
contig35799_186	1	132.794	143.774
contig35799_233	1	132.794	143.774
contig42821_107	1	132.794	143.774
contig49904_112	1	132.794	144.277
contig49904_207	1	132.794	144.277
contig454690_25	1	132.794	144.277
contig459339_50	1	132.794	143.774
contig459339_116	1	132.794	144.277
contig499528_157	1	132.794	143.774
contig611117_52	1	132.794	144.277
contig611117_97	1	132.794	144.277
contig683959_155	1	132.794	144.277
contig683959_181	1	132.794	143.774
contig692706_140	1	132.794	143.774
contig702402_46	1	132.794	144.779
contig702402_58	1	132.794	144.277
contig702402_129	1	132.794	143.774
contig720665_72	1	132.794	143.774
contig720665_113	1	132.794	144.277
contig740210_18	1	132.794	143.774
contig740210_23	1	132.794	143.774
contig740210_77	1	132.794	143.774
contig740210_79	1	132.794	143.774
contig740210_88	1	132.794	143.774
contig740210_170	1	132.794	143.774
contig740210_236	1	132.794	143.774
contig782928_103	1	132.794	144.779
contig782928_34	1	134.835	144.779
contig782928_59	1	134.835	144.779
contig41673_142	1	137.929	146.292
contig49162_97	1	137.929	146.794
contig49162_98	1	137.929	146.794
contig49162_132	1	137.929	146.794
contig49162_151	1	137.929	146.794
contig55043_81	1	137.929	145.282
contig702402_151	1	137.929	144.779
contig12845_67	1	138.431	147.297
contig12845_91	1	138.431	146.794
contig45034_12	1	138.431	146.794
contig45034_41	1	138.431	146.794
contig45034_114	1	138.431	146.794
contig49162_149	1	138.431	146.794
contig52906_173	1	138.431	148.307
contig602330_52	1	138.431	148.307
contig602330_127	1	138.431	148.307
contig602330_47	1	138.934	148.809
contig602330_229	1	138.934	148.307
contig1577_89	1	145.325	151.903
contig1577_113	1	145.325	151.903
contig1577_194	1	145.325	151.903
contig8877_22	1	145.325	151.903
contig47978_6	1	145.325	153.426
contig47978_123	1	145.325	153.426
contig47978_211	1	145.325	153.426
contig37925_22	1	146.336	155.991
contig37925_107	1	146.336	155.991
contig37925_187	1	146.336	155.991
contig3957_6	1	147.346	160.16
contig3957_113	1	147.346	160.16
contig3957_127	1	147.346	160.16
contig40899_20	1	147.346	160.16
contig3957_46	1	149.91	160.16
contig40899_119	1	149.91	160.662
contig256682_22	1	149.91	162.704
contig23345_109	1	151.951	166.873
contig23345_118	1	151.951	166.873
contig23345_140	1	151.951	166.873
contig23345_145	1	151.951	166.873
contig23345_166	1	151.951	166.873
contig23345_176	1	151.951	166.873
contig23345_184	1	151.951	166.873
contig68869_16	1	151.951	166.873
contig68869_85	1	151.951	166.873
contig68869_143	1	151.951	166.873
contig68869_149	1	151.951	166.873
contig68869_163	1	151.951	166.873
contig68869_164	1	151.951	166.873
contig68869_165	1	151.951	166.873
contig68869_167	1	151.951	166.873
contig68869_170	1	151.951	166.873
contig68869_177	1	151.951	166.873
contig68869_227	1	151.951	166.873
contig472423_39	1	151.951	166.873
contig472423_156	1	151.951	166.873
contig472423_162	1	151.951	166.873
contig720849_120	1	151.951	166.873
contig720849_149	1	151.951	166.873
contig720849_172	1	151.951	166.873
contig720849_177	1	151.951	166.873
contig469_104	1	153.474	173.653
contig469_200	1	153.474	173.653
contig13817_6	1	153.474	177.822
contig13817_11	1	153.474	168.385
contig13817_93	1	153.474	168.385
contig13817_105	1	153.474	168.385
contig31619_187	1	153.474	177.822
contig293882_93	1	153.474	167.883
contig293882_94	1	153.474	167.883
contig774955_2	1	153.474	168.385
contig774955_56	1	153.474	168.385
contig774955_67	1	153.474	168.385
contig774955_186	1	153.474	168.385
contig815570_170	1	153.474	168.385
contig31619_196	1	154.997	177.822
contig78646_33	1	154.997	178.833
contig78646_116	1	154.997	178.833
contig6292_152	1	155.5	178.833
contig12932_90	1	155.5	179.335
contig12932_126	1	155.5	179.838
contig12932_144	1	155.5	179.335
contig12932_162	1	155.5	179.838
contig23345_151	1	155.5	179.838
contig23345_204	1	155.5	179.335
contig23916_147	1	155.5	179.335
contig23916_191	1	155.5	179.335
contig31619_21	1	155.5	179.335
contig31619_34	1	155.5	179.335
contig31619_61	1	155.5	179.335
contig31619_206	1	155.5	179.335
contig33101_8	1	155.5	179.335
contig33101_17	1	155.5	179.335
contig33101_115	1	155.5	179.335
contig33326_11	1	155.5	178.833
contig39271_2	1	155.5	179.335
contig39271_135	1	155.5	179.335
contig39271_189	1	155.5	179.335
contig39271_191	1	155.5	179.335
contig42901_96	1	155.5	179.335
contig42901_106	1	155.5	179.335
contig42901_126	1	155.5	179.335
contig54386_105	1	155.5	179.335
contig54386_111	1	155.5	178.833
contig54386_116	1	155.5	179.335
contig55643_52	1	155.5	179.335
contig55643_159	1	155.5	179.838
contig55643_206	1	155.5	179.335
contig55643_229	1	155.5	179.335
contig55643_232	1	155.5	179.335
contig55643_247	1	155.5	179.838
contig56292_59	1	155.5	179.335
contig59606_36	1	155.5	179.335
contig59606_39	1	155.5	179.335
contig68869_14	1	155.5	179.838
contig68869_21	1	155.5	179.335
contig68869_24	1	155.5	179.838
contig68869_206	1	155.5	179.838
contig206777_37	1	155.5	179.838
contig206777_98	1	155.5	179.335
contig276401_27	1	155.5	179.335
contig344406_17	1	155.5	179.335
contig344406_28	1	155.5	179.335
contig383171_51	1	155.5	179.335
contig383171_83	1	155.5	179.838
contig383171_87	1	155.5	179.838
contig383171_100	1	155.5	179.335
contig383171_112	1	155.5	179.335
contig472423_123	1	155.5	179.838
contig484024_71	1	155.5	179.335
contig523019_64	1	155.5	179.335
contig523019_112	1	155.5	179.335
contig554988_9	1	155.5	179.838
contig554988_50	1	155.5	179.335
contig554988_154	1	155.5	179.335
contig568094_5	1	155.5	179.335
contig568094_44	1	155.5	179.335
contig580308_14	1	155.5	178.833
contig580308_16	1	155.5	179.335
contig580308_24	1	155.5	178.833
contig617952_62	1	155.5	179.335
contig617952_94	1	155.5	179.335
contig617952_194	1	155.5	179.838
contig675580_148	1	155.5	179.838
contig720849_166	1	155.5	179.335
contig720849_207	1	155.5	179.838
contig780631_12	1	155.5	179.335
contig784270_26	1	155.5	179.335
contig784270_27	1	155.5	179.335
contig784270_92	1	155.5	179.335
contig815570_79	1	155.5	179.335
contig815570_108	1	155.5	179.335
contig815570_109	1	155.5	179.335
contig815570_145	1	155.5	178.833
contig833421_33	1	155.5	178.833
contig833421_35	1	155.5	179.335
contig833421_139	1	155.5	178.833
contig833960_38	1	155.5	179.335
contig834881_179	1	155.5	179.335
contig256682_8	1	157.541	182.931
contig434348_26	1	169.327	214.675
contig434348_73	1	169.327	214.675
contig53215_16	2	0	0
contig53215_30	2	0	0
contig506830_45	2	0	0
contig5456_17	2	1.523	0.503
contig5456_91	2	1.523	1.513
contig5456_92	2	1.523	0.503
contig5456_97	2	1.523	0.503
contig5456_130	2	1.523	1.513
contig5456_131	2	1.523	1.513
contig5456_156	2	1.523	0.503
contig5456_177	2	1.523	0.503
contig5456_186	2	1.523	1.513
contig22185_21	2	1.523	0
contig37468_39	2	1.523	1.513
contig37468_70	2	1.523	1.513
contig52639_120	2	1.523	1.513
contig506830_20	2	1.523	1.513
contig506830_23	2	1.523	1.513
contig6585_116	2	3.046	1.513
contig6585_193	2	3.046	1.513
contig24157_27	2	3.046	1.513
contig37150_100	2	3.046	1.513
contig37150_169	2	3.046	1.513
contig37150_236	2	3.046	1.513
contig37468_14	2	3.046	1.513
contig37468_72	2	3.046	1.513
contig37468_209	2	3.046	1.513
contig756124_64	2	3.046	1.513
contig6585_14	2	4.056	1.513
contig37468_15	2	4.056	1.513
contig37468_28	2	4.056	1.513
contig37468_141	2	4.056	1.513
contig83086_41	2	4.056	1.513
contig359506_71	2	4.056	1.513
contig422633_139	2	4.056	1.513
contig496815_45	2	4.056	1.513
contig616764_59	2	4.056	1.513
contig616764_69	2	4.056	1.513
contig645068_67	2	4.056	1.513
contig756124_55	2	4.056	1.513
contig24157_22	2	5.066	5.141
contig24157_47	2	5.066	1.513
contig725240_24	2	6.076	5.141
contig7642_4	2	6.579	5.141
contig7642_19	2	6.579	5.141
contig7642_41	2	6.579	5.644
contig17627_164	2	6.579	5.644
contig27218_139	2	6.579	5.141
contig27218_160	2	6.579	5.141
contig27218_198	2	6.579	5.141
contig69775_9	2	6.579	5.141
contig311674_31	2	6.579	5.141
contig311674_54	2	6.579	5.141
contig575109_20	2	6.579	5.141
contig890277_45	2	6.579	5.141
contig890277_87	2	6.579	5.141
contig1010_128	2	7.081	5.644
contig1010_227	2	7.081	5.644
contig17627_85	2	7.081	5.644
contig1010_2	2	7.584	7.664
contig17627_43	2	7.584	5.644
contig17627_48	2	7.584	6.654
contig17627_58	2	7.584	5.644
contig38581_74	2	7.584	7.664
contig38581_157	2	7.584	7.664
contig69775_53	2	7.584	7.664
contig69775_69	2	7.584	7.664
contig69775_115	2	7.584	7.664
contig311674_16	2	7.584	7.664
contig442865_59	2	7.584	6.654
contig575109_18	2	7.584	5.644
contig575109_26	2	7.584	6.654
contig778647_71	2	7.584	7.664
contig789017_21	2	7.584	7.664
contig789017_64	2	7.584	7.664
contig789017_115	2	7.584	5.644
contig1010_180	2	8.086	7.664
contig38581_279	2	8.086	9.705
contig69775_37	2	8.086	7.664
contig15330_20	2	11.715	9.705
contig38581_84	2	14.28	9.705
contig38581_108	2	14.28	9.705
contig38581_183	2	14.28	9.705
contig38581_214	2	14.28	9.705
contig560933_44	2	14.28	14.973
contig560933_91	2	14.28	14.973
contig560933_156	2	14.28	14.973
contig560933_111	2	14.782	14.973
contig560933_117	2	14.782	14.973
contig43635_57	2	15.285	17.538
contig43635_73	2	15.285	17.538
contig43635_112	2	15.285	17.538
contig43635_127	2	15.285	17.538
contig43635_131	2	15.285	17.538
contig43635_158	2	15.285	17.538
contig43635_203	2	15.285	17.538
contig11765_4	2	16.808	18.548
contig22363_141	2	17.31	19.05
contig22363_157	2	17.31	19.05
contig22363_186	2	17.31	20.061
contig22363_214	2	17.31	19.05
contig22363_216	2	17.31	19.05
contig22363_217	2	17.31	19.05
contig23353_14	2	17.31	18.548
contig28560_7	2	17.31	20.061
contig28560_76	2	17.31	20.061
contig28560_98	2	17.31	20.061
contig28560_111	2	17.31	20.061
contig28560_135	2	17.31	20.061
contig77643_16	2	17.31	19.05
contig77643_24	2	17.31	20.061
contig77643_70	2	17.31	19.05
contig77643_156	2	17.31	19.05
contig385916_71	2	17.31	19.05
contig834284_11	2	17.31	20.061
contig838726_39	2	17.31	19.05
contig65160_47	2	17.813	20.061
contig640203_93	2	17.813	20.061
contig659583_40	2	17.813	20.061
contig178_130	2	18.823	20.563
contig178_168	2	18.823	20.563
contig6892_74	2	18.823	20.563
contig6892_124	2	18.823	20.563
contig8638_71	2	18.823	20.563
contig8638_110	2	18.823	20.563
contig13196_36	2	18.823	20.563
contig13196_171	2	18.823	20.563
contig16280_152	2	18.823	20.563
contig732234_30	2	18.823	20.563
contig834284_109	2	18.823	20.563
contig2009_26	2	21.387	21.066
contig2009_30	2	21.387	21.066
contig2009_47	2	21.387	21.066
contig2009_158	2	21.387	21.066
contig691302_177	2	21.387	20.563
contig423300_22	2	21.89	21.066
contig423300_55	2	21.89	21.066
contig423300_98	2	21.89	21.568
contig423300_150	2	21.89	21.066
contig22721_143	2	28.853	26.836
contig748920_163	2	28.853	31.005
contig748920_164	2	28.853	31.005
contig711888_6	2	29.356	32.528
contig27337_149	2	29.858	33.031
contig34317_15	2	29.858	33.031
contig37510_49	2	29.858	34.041
contig47859_21	2	29.858	33.031
contig47859_164	2	29.858	33.031
contig47859_196	2	29.858	33.031
contig434537_18	2	29.858	34.041
contig671048_67	2	29.858	33.031
contig48565_50	2	30.361	36.082
contig725135_19	2	31.884	36.584
contig725135_29	2	31.884	36.584
contig17625_106	2	32.386	37.087
contig30825_172	2	32.386	37.087
contig755651_136	2	32.386	37.589
contig263_3	2	32.889	38.092
contig263_176	2	32.889	39.6
contig4906_90	2	32.889	38.092
contig6639_44	2	32.889	39.097
contig6639_188	2	32.889	39.097
contig6639_194	2	32.889	39.097
contig15696_19	2	32.889	38.595
contig15696_120	2	32.889	38.595
contig15696_178	2	32.889	38.092
contig15696_180	2	32.889	38.595
contig15696_197	2	32.889	38.595
contig15696_199	2	32.889	38.595
contig15696_202	2	32.889	38.595
contig17625_62	2	32.889	37.589
contig17625_70	2	32.889	37.589
contig22718_146	2	32.889	39.097
contig30825_63	2	32.889	37.589
contig30825_64	2	32.889	37.589
contig30825_106	2	32.889	37.589
contig30825_147	2	32.889	37.589
contig49314_79	2	32.889	37.589
contig49314_153	2	32.889	38.092
contig49314_192	2	32.889	38.092
contig49314_200	2	32.889	39.097
contig50800_122	2	32.889	37.589
contig51801_22	2	32.889	39.097
contig51801_91	2	32.889	37.589
contig64302_5	2	32.889	37.589
contig64302_17	2	32.889	39.097
contig64302_102	2	32.889	39.097
contig64302_104	2	32.889	39.097
contig64302_110	2	32.889	38.595
contig64302_173	2	32.889	38.595
contig64302_194	2	32.889	39.097
contig86600_225	2	32.889	38.092
contig92109_174	2	32.889	38.595
contig489383_102	2	32.889	39.097
contig489383_126	2	32.889	39.6
contig545529_120	2	32.889	38.595
contig545529_140	2	32.889	38.595
contig713745_191	2	32.889	38.595
contig783928_132	2	32.889	38.092
contig6031_48	2	34.412	40.605
contig6031_90	2	34.412	41.107
contig6031_92	2	34.412	40.102
contig6031_112	2	34.412	40.102
contig6031_130	2	34.412	40.605
contig27000_41	2	34.412	40.605
contig34958_29	2	34.412	40.605
contig34958_53	2	34.412	41.107
contig34958_59	2	34.412	41.107
contig34958_235	2	34.412	40.102
contig50800_48	2	34.412	40.605
contig53990_194	2	34.412	41.107
contig64695_126	2	34.412	41.107
contig64695_140	2	34.412	40.605
contig64695_145	2	34.412	41.107
contig64695_168	2	34.412	40.102
contig64695_172	2	34.412	41.107
contig64695_174	2	34.412	40.605
contig64695_185	2	34.412	40.605
contig64695_203	2	34.412	41.107
contig64695_207	2	34.412	40.605
contig64695_231	2	34.412	40.605
contig64695_237	2	34.412	41.107
contig65407_44	2	34.412	40.605
contig65407_107	2	34.412	40.605
contig65407_123	2	34.412	40.102
contig101547_46	2	34.412	41.107
contig101547_98	2	34.412	41.107
contig488575_108	2	34.412	40.102
contig615736_49	2	34.412	40.605
contig615736_68	2	34.412	40.605
contig633202_49	2	34.412	41.107
contig713745_71	2	34.412	40.605
contig801265_48	2	34.412	40.102
contig801265_71	2	34.412	40.102
contig9045_56	2	36.976	41.107
contig9045_119	2	36.976	41.107
contig9045_149	2	36.976	41.107
contig9045_176	2	36.976	41.107
contig9045_179	2	36.976	41.107
contig9045_185	2	36.976	41.107
contig9045_207	2	36.976	41.107
contig53990_181	2	36.976	41.107
contig64695_228	2	36.976	41.107
contig633202_141	2	36.976	41.107
contig9045_124	2	37.479	41.107
contig9045_168	2	37.479	41.107
contig9045_213	2	37.479	41.107
contig101547_73	2	37.479	41.107
contig101547_110	2	37.479	41.107
contig101547_111	2	37.479	41.107
contig101547_137	2	37.479	41.107
contig101547_168	2	37.479	41.107
contig101547_195	2	37.479	41.107
contig794566_82	2	37.479	41.107
contig16494_67	2	39.002	43.651
contig16494_72	2	39.002	43.148
contig16494_94	2	39.002	43.651
contig16494_182	2	39.002	43.651
contig18086_13	2	39.002	43.651
contig18086_26	2	39.002	43.651
contig18086_46	2	39.002	43.148
contig18086_107	2	39.002	43.148
contig30993_10	2	39.002	43.651
contig30993_40	2	39.002	43.651
contig30993_138	2	39.002	43.148
contig30993_168	2	39.002	43.651
contig42906_55	2	39.002	44.153
contig51279_86	2	39.002	43.651
contig51279_89	2	39.002	44.656
contig51279_154	2	39.002	44.656
contig56935_81	2	39.002	44.153
contig56935_181	2	39.002	43.651
contig71062_21	2	39.002	43.651
contig157346_76	2	39.002	44.153
contig671183_77	2	39.002	43.148
contig671183_108	2	39.002	43.651
contig700581_76	2	39.002	43.651
contig700581_108	2	39.002	43.651
contig811730_18	2	39.002	43.148
contig811730_32	2	39.002	43.148
contig811730_79	2	39.002	43.148
contig819564_91	2	39.002	43.651
contig819564_135	2	39.002	43.651
contig819564_153	2	39.002	43.651
contig34278_78	2	39.504	44.656
contig34278_156	2	39.504	44.656
contig34278_234	2	39.504	45.158
contig34278_235	2	39.504	45.158
contig56070_33	2	39.504	44.656
contig744848_74	2	39.504	45.158
contig744848_109	2	39.504	45.158
contig894738_83	2	39.504	45.158
contig8832_119	2	40.514	45.661
contig13225_113	2	40.514	47.168
contig13225_114	2	40.514	47.168
contig22832_86	2	40.514	45.661
contig22832_105	2	40.514	45.661
contig22832_106	2	40.514	45.661
contig22832_112	2	40.514	45.661
contig22832_122	2	40.514	45.661
contig30352_5	2	40.514	47.168
contig30352_37	2	40.514	47.168
contig30352_223	2	40.514	47.168
contig30352_228	2	40.514	45.158
contig30352_233	2	40.514	45.661
contig30352_251	2	40.514	47.168
contig34278_51	2	40.514	45.158
contig41953_47	2	40.514	47.168
contig46065_6	2	40.514	45.661
contig46065_78	2	40.514	45.661
contig46065_184	2	40.514	45.661
contig52150_90	2	40.514	47.168
contig52150_106	2	40.514	47.168
contig52150_118	2	40.514	47.168
contig52150_137	2	40.514	47.168
contig52150_152	2	40.514	47.168
contig52150_159	2	40.514	47.168
contig52150_171	2	40.514	47.168
contig52150_182	2	40.514	47.168
contig514231_2	2	40.514	45.661
contig514231_162	2	40.514	46.666
contig562244_74	2	40.514	46.163
contig688258_99	2	40.514	45.661
contig791642_101	2	40.514	45.661
contig791642_109	2	40.514	45.661
contig791642_110	2	40.514	45.661
contig13225_115	2	41.017	47.671
contig15139_4	2	41.017	47.671
contig15139_71	2	41.017	47.671
contig15139_112	2	41.017	47.671
contig721895_81	2	41.017	47.671
contig752031_135	2	41.017	47.671
contig752031_149	2	41.017	47.671
contig752031_150	2	41.017	47.671
contig15139_99	2	41.519	48.173
contig15139_129	2	41.519	48.173
contig15139_131	2	41.519	48.173
contig18211_135	2	41.519	48.676
contig21995_111	2	41.519	47.671
contig21995_113	2	41.519	47.671
contig21995_165	2	41.519	48.173
contig31370_183	2	41.519	47.671
contig33068_9	2	41.519	47.671
contig33068_52	2	41.519	48.676
contig33068_86	2	41.519	48.676
contig33068_107	2	41.519	48.173
contig33068_113	2	41.519	48.173
contig33068_160	2	41.519	48.676
contig33191_251	2	41.519	48.676
contig33191_259	2	41.519	48.676
contig33191_263	2	41.519	48.676
contig46587_224	2	41.519	48.676
contig57223_32	2	41.519	48.676
contig57223_164	2	41.519	48.676
contig57223_182	2	41.519	48.676
contig69602_2	2	41.519	48.676
contig69602_4	2	41.519	48.676
contig69602_10	2	41.519	48.676
[truncated: 27,771 more rows]
